# Supplementary material for: Clustering-based COPD subtypes have distinct longitudinal outcomes and multi-omics biomarkers
Source: HighWire-hosted journal article supplement (doi:10.1136/bmjresp-2021-001182), 2022-08-01
Supplement: bmjresp-2021-001182supp005_data_supplement.xlsx [file bmjresp-2021-001182supp005_data_supplement.xlsx]

## Sheet: ULE vs. RRS
Table S7. Differential gene expression between k-means clusters (covariates: k-means cluster assignment, age, race, sex, and current smoking status, white blood cell count proportions, and library prep batch). We corrected for multiple comparisons with the Benjamini-Hochberg method. In this file, there are 6 sheets for each pairwise comparison between the four k-means clusters. The cluster follow…
Ensembl gene ID	HUGO gene symbol	Log fold change	Average expression	FDR
ENSG00000154165	GPR15	0.492209	4.32812	2.79368e-11
ENSG00000063438	AHRR	0.363585	-0.246724	0.0347598
ENSG00000135898	GPR55	0.196323	2.7659	0.0415754
ENSG00000183856	IQGAP3	0.332519	-1.73719	0.371094
ENSG00000144668	ITGA9	0.210285	1.29264	0.578909
ENSG00000149516	MS4A3	0.288479	2.39308	0.578909
ENSG00000151715	TMEM45B	-0.180289	3.28696	0.578909
ENSG00000179409	GEMIN4	-0.0669737	4.18211	0.578909
ENSG00000254528	RP11-728F11.4	-0.299278	-0.17763	0.578909
ENSG00000272636	DOC2B	0.363937	-1.598	0.578909
ENSG00000114948	ADAM23	0.228576	2.88601	0.705904
ENSG00000142794	NBPF3	-0.127134	3.72593	0.930241
ENSG00000165891	E2F7	0.234827	-0.528481	0.930241
ENSG00000175556	LONRF3	-0.0834476	3.58447	0.930241
ENSG00000177879	AP3S1	0.0734499	4.67209	0.930241
ENSG00000198692	EIF1AY	0.163934	0.964667	0.930241
ENSG00000207820	MIR545	0.252749	-1.59058	0.930241
ENSG00000273983	HIST1H3G	0.203262	2.10244	0.930241
ENSG00000276368	HIST1H2AJ	0.204964	1.37074	0.930241
ENSG00000073711	PPP2R3A	-0.210253	-0.102068	0.931728
ENSG00000163050	ADCK3	-0.0772377	5.70868	0.931728
ENSG00000184661	CDCA2	0.217775	-0.0369942	0.931728
ENSG00000211734	TRBV5-1	-0.135086	2.80425	0.931728
ENSG00000085491	SLC25A24	0.0654571	5.72194	0.951365
ENSG00000092096	SLC22A17	-0.204967	0.307687	0.951365
ENSG00000113810	SMC4	0.0615799	5.90142	0.951365
ENSG00000124334	IL9R	0.210398	-0.255926	0.951365
ENSG00000133477	FAM83F	0.24061	0.242101	0.951365
ENSG00000165730	STOX1	-0.364329	-0.913793	0.951365
ENSG00000197299	BLM	0.0674999	3.79104	0.951365
ENSG00000199347	RNU5E-1	0.304101	0.081756	0.951365
ENSG00000200241	Y_RNA	0.245526	-2.31445	0.951365
ENSG00000211780	TRAV6	-0.177451	0.678303	0.951365
ENSG00000237649	KIFC1	0.185218	0.170051	0.951365
ENSG00000272002	RP11-557L19.1	-0.261144	-2.31474	0.951365
ENSG00000274267	HIST1H3B	0.169435	3.32229	0.951365
ENSG00000275158	TRBV12-5	-0.274743	-1.26864	0.951365
ENSG00000001497	LAS1L	-0.0451322	4.59115	0.986458
ENSG00000006282	SPATA20	-0.161715	2.98554	0.986458
ENSG00000006576	PHTF2	0.0511388	5.93394	0.986458
ENSG00000064270	ATP2C2	0.280639	-0.557646	0.986458
ENSG00000064763	FAR2	0.0674551	5.78883	0.986458
ENSG00000065328	MCM10	0.176732	0.105805	0.986458
ENSG00000068394	GPKOW	-0.0501745	4.15125	0.986458
ENSG00000070018	LRP6	-0.12529	2.39932	0.986458
ENSG00000072274	TFRC	0.0833703	6.79739	0.986458
ENSG00000073282	TP63	0.215199	-1.27583	0.986458
ENSG00000079691	LRRC16A	-0.123367	3.56678	0.986458
ENSG00000080822	CLDND1	0.0656593	6.13136	0.986458
ENSG00000087128	TMPRSS11E	0.274928	-2.35892	0.986458
ENSG00000088325	TPX2	0.141402	1.81605	0.986458
ENSG00000089006	SNX5	0.0372754	6.53772	0.986458
ENSG00000093009	CDC45	0.250501	-1.1428	0.986458
ENSG00000095951	HIVEP1	-0.0412884	6.98121	0.986458
ENSG00000096006	CRISP3	0.238194	2.03543	0.986458
ENSG00000096696	DSP	-0.428742	0.626882	0.986458
ENSG00000100207	TCF20	-0.0440247	7.12371	0.986458
ENSG00000100448	CTSG	0.308268	0.181471	0.986458
ENSG00000100473	COCH	0.182143	1.15394	0.986458
ENSG00000100591	AHSA1	-0.0400185	5.53342	0.986458
ENSG00000102038	SMARCA1	-0.252461	-0.956392	0.986458
ENSG00000103355	PRSS33	-0.180387	0.831196	0.986458
ENSG00000104043	ATP8B4	0.0751179	5.90619	0.986458
ENSG00000105072	C19orf44	-0.09425	0.920712	0.986458
ENSG00000105767	CADM4	-0.133085	1.04688	0.986458
ENSG00000107249	GLIS3	-0.202109	0.737909	0.986458
ENSG00000107281	NPDC1	0.150916	1.86424	0.986458
ENSG00000107518	ATRNL1	0.223852	-2.01638	0.986458
ENSG00000107742	SPOCK2	-0.0617495	7.25286	0.986458
ENSG00000109189	USP46	0.0805207	4.0771	0.986458
ENSG00000110107	PRPF19	-0.0418482	5.34287	0.986458
ENSG00000111728	ST8SIA1	0.105002	3.95616	0.986458
ENSG00000116922	C1orf109	-0.0560286	3.4404	0.986458
ENSG00000117594	HSD11B1	-0.226628	-2.02022	0.986458
ENSG00000118520	ARG1	0.176245	3.02722	0.986458
ENSG00000119457	SLC46A2	-0.0966601	3.34909	0.986458
ENSG00000120256	LRP11	0.124074	0.665103	0.986458
ENSG00000120875	DUSP4	0.138441	0.764008	0.986458
ENSG00000120915	EPHX2	-0.101824	3.99025	0.986458
ENSG00000120942	UBIAD1	-0.048218	4.38931	0.986458
ENSG00000121594	CD80	0.134307	1.22044	0.986458
ENSG00000123965	PMS2P5	0.187978	-0.538276	0.986458
ENSG00000125454	SLC25A19	-0.0587714	2.86711	0.986458
ENSG00000129173	E2F8	0.225773	-1.43347	0.986458
ENSG00000131747	TOP2A	0.132757	2.62193	0.986458
ENSG00000132465	IGJ	0.223059	5.0365	0.986458
ENSG00000133895	MEN1	-0.0695354	2.93613	0.986458
ENSG00000134827	TCN1	0.174892	2.90282	0.986458
ENSG00000135049	AGTPBP1	0.0409939	8.08221	0.986458
ENSG00000136098	NEK3	0.0734544	2.70855	0.986458
ENSG00000136492	BRIP1	0.0866731	3.00565	0.986458
ENSG00000136689	IL1RN	-0.0871278	5.4238	0.986458
ENSG00000137474	MYO7A	-0.143043	0.854001	0.986458
ENSG00000137710	RDX	0.0555573	4.37908	0.986458
ENSG00000138758	2021-09-11	0.0489648	5.57442	0.986458
ENSG00000139624	CERS5	0.0389877	4.87651	0.986458
ENSG00000140525	FANCI	0.062645	3.95719	0.986458
ENSG00000140807	NKD1	-0.165079	0.633294	0.986458
ENSG00000143110	C1orf162	-0.0452621	6.43876	0.986458
ENSG00000143869	GDF7	-0.221216	1.57991	0.986458
ENSG00000144655	CSRNP1	-0.0909533	5.17814	0.986458
ENSG00000146918	NCAPG2	0.119803	3.84576	0.986458
ENSG00000147687	TATDN1	0.0715286	2.80419	0.986458
ENSG00000148154	UGCG	0.0579862	5.60446	0.986458
ENSG00000148346	LCN2	0.210314	2.85554	0.986458
ENSG00000148773	MKI67	0.125191	4.38183	0.986458
ENSG00000151320	AKAP6	-0.150195	2.76302	0.986458
ENSG00000151575	TEX9	0.13472	1.21133	0.986458
ENSG00000153093	ACOXL	-0.174075	-0.199527	0.986458
ENSG00000156509	FBXO43	0.222515	-2.06319	0.986458
ENSG00000156869	FRRS1	0.0875516	2.7867	0.986458
ENSG00000161204	ABCF3	-0.0398329	5.07727	0.986458
ENSG00000162627	SNX7	0.254886	-2.11263	0.986458
ENSG00000162849	KIF26B	-0.252676	-1.84276	0.986458
ENSG00000162929	KIAA1841	0.0582526	3.30631	0.986458
ENSG00000163528	CHCHD4	-0.0611752	2.79135	0.986458
ENSG00000164045	CDC25A	0.199806	-0.739117	0.986458
ENSG00000164073	MFSD8	0.043773	5.10011	0.986458
ENSG00000164077	MON1A	-0.0775145	2.58911	0.986458
ENSG00000164466	SFXN1	0.0402419	5.45167	0.986458
ENSG00000164484	TMEM200A	0.146949	1.0876	0.986458
ENSG00000164675	IQUB	0.201232	-1.73941	0.986458
ENSG00000165300	SLITRK5	-0.24876	-0.268455	0.986458
ENSG00000165424	ZCCHC24	-0.0915959	1.79947	0.986458
ENSG00000165688	PMPCA	-0.0362255	4.24155	0.986458
ENSG00000165716	FAM69B	-0.199798	0.00992834	0.986458
ENSG00000166750	SLFN5	0.0565658	8.10037	0.986458
ENSG00000168995	SIGLEC7	-0.0764746	3.95008	0.986458
ENSG00000169397	RNASE3	0.252647	0.288587	0.986458
ENSG00000170298	LGALS9B	-0.267869	-1.3981	0.986458
ENSG00000170365	SMAD1	0.131363	2.10477	0.986458
ENSG00000170448	NFXL1	0.134617	5.20701	0.986458
ENSG00000170801	HTRA3	0.244345	-2.27923	0.986458
ENSG00000172985	SH3RF3	-0.127591	2.34628	0.986458
ENSG00000174255	ZNF80	-0.221893	1.13267	0.986458
ENSG00000175137	SH3BP5L	-0.0546766	6.42419	0.986458
ENSG00000175352	NRIP3	0.159254	0.589064	0.986458
ENSG00000176476	CCDC101	-0.0567225	3.61533	0.986458
ENSG00000179869	ABCA13	0.230653	3.47014	0.986458
ENSG00000181778	TMEM252	-0.137214	2.03834	0.986458
ENSG00000181873	IBA57	0.0659004	3.96804	0.986458
ENSG00000183458	RP11-958N24.1	-0.116293	-0.103339	0.986458
ENSG00000184178	SCFD2	-0.04413	4.91685	0.986458
ENSG00000184357	HIST1H1B	0.129305	4.42246	0.986458
ENSG00000184436	THAP7	-0.0652718	3.92766	0.986458
ENSG00000184900	SUMO3	-0.0426777	3.96097	0.986458
ENSG00000184905	TCEAL2	-0.231483	-2.27913	0.986458
ENSG00000185710	SMG1P4	0.273235	0.989875	0.986458
ENSG00000196569	LAMA2	-0.130773	1.65796	0.986458
ENSG00000196656	AC004057.1	-0.270913	-1.34047	0.986458
ENSG00000196873	CBWD3	0.0879602	2.43052	0.986458
ENSG00000197301	RP11-366L20.2	0.145648	0.369947	0.986458
ENSG00000197403	OR6N1	0.278795	-2.28542	0.986458
ENSG00000197561	ELANE	0.253527	-0.462134	0.986458
ENSG00000198270	TMEM116	0.0560588	4.5181	0.986458
ENSG00000198796	ALPK2	0.234694	0.387602	0.986458
ENSG00000198908	BHLHB9	-0.0790152	1.65825	0.986458
ENSG00000198932	GPRASP1	-0.0693637	5.35251	0.986458
ENSG00000198933	TBKBP1	-0.113078	3.22161	0.986458
ENSG00000200156	RNU5B-1	0.30775	1.82979	0.986458
ENSG00000200183	RNU6-238P	-0.199075	-2.03272	0.986458
ENSG00000200816	SNORA38	0.204495	0.310663	0.986458
ENSG00000201221	RNU4-40P	0.205727	-1.03015	0.986458
ENSG00000203414	BTBD7P1	-0.220994	-0.836388	0.986458
ENSG00000204177	BMS1P1	0.122316	2.38029	0.986458
ENSG00000204386	NEU1	-0.0482484	5.20518	0.986458
ENSG00000204778	RP11-15J10.1	0.21185	-0.183544	0.986458
ENSG00000207523	SNORA66	0.187203	-0.988044	0.986458
ENSG00000211553	AC253576.2	-0.171977	1.18109	0.986458
ENSG00000211662	IGLV3-21	0.227234	1.42349	0.986458
ENSG00000211677	IGLC2	0.190826	3.38956	0.986458
ENSG00000211678	IGLJ3	-0.230357	-2.15019	0.986458
ENSG00000211803	TRAV23DV6	-0.165622	1.51177	0.986458
ENSG00000212443	SNORA53	0.305528	3.37576	0.986458
ENSG00000212719	C17orf51	-0.0945474	2.10777	0.986458
ENSG00000213693	SEC14L1P1	-0.0615105	3.03363	0.986458
ENSG00000214960	ISPD	0.139666	1.66937	0.986458
ENSG00000223551	TMSB4XP4	0.171968	-0.332223	0.986458
ENSG00000224152	AC009506.1	-0.0953822	3.12474	0.986458
ENSG00000224312	MCCD1P2	0.20295	-2.26288	0.986458
ENSG00000224460	RP11-439L18.2	-0.168295	-0.550309	0.986458
ENSG00000224650	IGHV3-74	0.197876	0.12409	0.986458
ENSG00000225025	KIF4CP	0.243995	-1.11574	0.986458
ENSG00000225873	LINC00694	-0.105663	3.01338	0.986458
ENSG00000226240	LINC00381	-0.209951	-1.18345	0.986458
ENSG00000226686	LINC01535	0.235394	-1.932	0.986458
ENSG00000229124	VIM-AS1	0.0461996	5.02537	0.986458
ENSG00000233108	AC006042.7	0.214029	-1.97767	0.986458
ENSG00000233820	RP11-535M15.2	0.276737	-1.06887	0.986458
ENSG00000234222	RP11-315I20.1	0.204356	-1.39808	0.986458
ENSG00000235369	RPL36AP15	0.142984	-0.0216888	0.986458
ENSG00000236447	ATG10-IT1	0.215385	-2.03816	0.986458
ENSG00000237298	TTN-AS1	0.0540064	7.26064	0.986458
ENSG00000237989	AP001046.5	-0.248282	-1.38624	0.986458
ENSG00000238015	RP4-641G12.3	-0.25511	-0.874478	0.986458
ENSG00000238222	MKRN4P	0.294804	-1.00987	0.986458
ENSG00000238287	RP11-656D10.3	0.16034	-0.0712294	0.986458
ENSG00000243661	WBP1LP1	-0.194737	-0.541489	0.986458
ENSG00000243708	PLA2G4B	-0.179489	-0.516742	0.986458
ENSG00000243746	EEF1A1P10	-0.0918137	2.33774	0.986458
ENSG00000244055	AC007566.10	0.0970261	1.59009	0.986458
ENSG00000245648	RP11-277P12.20	0.220876	-1.51661	0.986458
ENSG00000246859	STARD4-AS1	-0.20999	-1.53065	0.986458
ENSG00000247624	CPEB2-AS1	-0.0874611	1.72668	0.986458
ENSG00000254006	RP11-1D12.2	0.304992	-2.1631	0.986458
ENSG00000254500	RANP3	0.168252	-0.456288	0.986458
ENSG00000254739	RP13-46H24.1	-0.218528	-2.13856	0.986458
ENSG00000255026	RP11-326C3.2	-0.118073	2.88689	0.986458
ENSG00000255115	RP11-91P24.3	-0.162882	-0.445468	0.986458
ENSG00000258057	BCDIN3D-AS1	-0.196634	-0.885	0.986458
ENSG00000258297	RP11-658F2.8	0.0591531	3.35006	0.986458
ENSG00000258357	RP11-778J16.2	0.200273	-2.00643	0.986458
ENSG00000258790	KIAA0391	0.209588	-2.18071	0.986458
ENSG00000258920	FOXN3-AS1	-0.141842	0.0402159	0.986458
ENSG00000259407	RP11-158M2.3	0.190085	-1.49153	0.986458
ENSG00000259959	RP11-121C2.2	0.141267	3.49177	0.986458
ENSG00000260947	RP11-384P7.7	0.274106	-0.0753042	0.986458
ENSG00000264167	RP1-253P7.1	0.230071	-1.91152	0.986458
ENSG00000265273	PGDP1	-0.214669	-2.33221	0.986458
ENSG00000265287	RP11-192H23.6	0.230802	-2.15921	0.986458
ENSG00000266094	RASSF5	-0.03385	8.34801	0.986458
ENSG00000266473	RP11-401F2.3	-0.195868	-2.38549	0.986458
ENSG00000267895	SIGLEC19P	-0.156078	-0.0117403	0.986458
ENSG00000269892	RP4-761J14.10	0.153059	0.226064	0.986458
ENSG00000271141	RP11-171I2.4	0.0842379	2.2382	0.986458
ENSG00000271452	RP11-342K6.2	-0.198281	-1.4459	0.986458
ENSG00000272659	AP000295.10	0.203245	-1.21354	0.986458
ENSG00000273008	RP11-351D16.3	-0.131889	-0.0220177	0.986458
ENSG00000273108	RP11-416N2.4	-0.216136	-1.68186	0.986458
ENSG00000273196	RP11-717A5.2	0.225551	-2.27123	0.986458
ENSG00000275638	RP11-16E23.5	0.0855361	1.63936	0.986458
ENSG00000276293	PIP4K2B	-0.0315893	6.07906	0.986458
ENSG00000276696	Y_RNA	-0.230272	-2.23724	0.986458
ENSG00000278272	HIST1H3C	0.154701	2.45334	0.986458
ENSG00000279693	RP11-71L14.3	-0.160492	0.195344	0.986458
ENSG00000279989	RP11-158H5.2	-0.222674	-1.09821	0.986458
ENSG00000155666	KDM8	-0.058754	2.94264	0.987274
ENSG00000000003	TSPAN6	-0.116017	-1.08109	0.996474
ENSG00000000419	DPM1	0.042366	4.00812	0.996474
ENSG00000000457	SCYL3	-0.0101475	5.95328	0.996474
ENSG00000000460	C1orf112	-0.0056662	3.98086	0.996474
ENSG00000000938	FGR	-0.0101656	8.66446	0.996474
ENSG00000000971	CFH	0.056947	3.31632	0.996474
ENSG00000001036	FUCA2	0.00368722	4.31699	0.996474
ENSG00000001084	GCLC	0.0335225	5.32217	0.996474
ENSG00000001167	NFYA	0.00795856	6.29579	0.996474
ENSG00000001460	STPG1	-0.00822629	1.65432	0.996474
ENSG00000001461	NIPAL3	-0.0117247	6.26836	0.996474
ENSG00000001629	ANKIB1	0.0106699	6.33139	0.996474
ENSG00000001630	CYP51A1	-0.0557795	-0.192693	0.996474
ENSG00000001631	KRIT1	0.0235474	5.96709	0.996474
ENSG00000002016	RAD52	0.00466505	3.37371	0.996474
ENSG00000002549	LAP3	-0.0145091	6.25445	0.996474
ENSG00000002726	AOC1	-0.180275	-0.805627	0.996474
ENSG00000002745	WNT16	-0.0830328	0.0130259	0.996474
ENSG00000002822	MAD1L1	-0.0226401	5.18908	0.996474
ENSG00000002834	LASP1	-0.0245906	7.78492	0.996474
ENSG00000002919	SNX11	-0.00730903	5.20941	0.996474
ENSG00000002933	TMEM176A	-0.288282	2.05455	0.996474
ENSG00000003056	M6PR	-0.00341674	7.26979	0.996474
ENSG00000003096	KLHL13	-0.0923818	-0.244968	0.996474
ENSG00000003137	CYP26B1	0.0932127	-2.75838	0.996474
ENSG00000003147	ICA1	0.0568917	1.97615	0.996474
ENSG00000003249	DBNDD1	-0.0585115	-0.851139	0.996474
ENSG00000003393	ALS2	0.0240948	5.01116	0.996474
ENSG00000003400	CASP10	-0.0132593	6.46315	0.996474
ENSG00000003402	CFLAR	0.0160162	10.1988	0.996474
ENSG00000003436	TFPI	0.0139703	1.98196	0.996474
ENSG00000003509	NDUFAF7	0.00582679	4.63239	0.996474
ENSG00000004142	POLDIP2	-0.0113102	5.19566	0.996474
ENSG00000004399	PLXND1	-0.0229468	4.49232	0.996474
ENSG00000004455	AK2	-0.00198225	6.62547	0.996474
ENSG00000004468	CD38	-0.0287979	4.35564	0.996474
ENSG00000004478	FKBP4	-0.0373284	4.47174	0.996474
ENSG00000004487	KDM1A	-0.0172551	5.68778	0.996474
ENSG00000004534	RBM6	-0.0122154	7.00137	0.996474
ENSG00000004660	CAMKK1	-0.0183008	3.78398	0.996474
ENSG00000004700	RECQL	0.026919	6.12645	0.996474
ENSG00000004766	CCDC132	0.0231537	5.89567	0.996474
ENSG00000004777	ARHGAP33	0.0508518	0.0493147	0.996474
ENSG00000004799	PDK4	-0.0629862	5.2446	0.996474
ENSG00000004809	SLC22A16	0.0385944	1.72926	0.996474
ENSG00000004846	ABCB5	-0.0261416	-2.25239	0.996474
ENSG00000004864	SLC25A13	0.0264502	4.25339	0.996474
ENSG00000004866	ST7	-0.0129112	3.04252	0.996474
ENSG00000004897	CDC27	0.0329973	6.89618	0.996474
ENSG00000004939	SLC4A1	0.0330372	8.98311	0.996474
ENSG00000004961	HCCS	-0.0149839	3.83322	0.996474
ENSG00000004975	DVL2	-0.0298722	3.17209	0.996474
ENSG00000005007	UPF1	-0.0203681	6.82109	0.996474
ENSG00000005020	SKAP2	0.0202716	6.53284	0.996474
ENSG00000005022	SLC25A5	-0.00704049	6.24362	0.996474
ENSG00000005059	CCDC109B	0.0122651	5.48651	0.996474
ENSG00000005075	POLR2J	-0.0205878	3.98168	0.996474
ENSG00000005100	DHX33	-0.0080344	3.65426	0.996474
ENSG00000005102	MEOX1	-0.0658547	0.142769	0.996474
ENSG00000005108	THSD7A	0.201755	0.0791047	0.996474
ENSG00000005156	LIG3	-0.00713566	5.35818	0.996474
ENSG00000005175	RPAP3	0.0193378	5.63562	0.996474
ENSG00000005187	ACSM3	0.0205066	3.84597	0.996474
ENSG00000005189	AC004381.6	0.0877824	0.900343	0.996474
ENSG00000005194	CIAPIN1	-0.00568855	4.28545	0.996474
ENSG00000005243	COPZ2	0.0602318	0.098666	0.996474
ENSG00000005302	MSL3	0.0144936	6.38202	0.996474
ENSG00000005339	CREBBP	-0.0198503	7.10071	0.996474
ENSG00000005381	MPO	0.171887	1.82243	0.996474
ENSG00000005436	GCFC2	0.00998696	4.13746	0.996474
ENSG00000005469	CROT	-0.00568841	3.79678	0.996474
ENSG00000005471	ABCB4	-0.0489976	2.80413	0.996474
ENSG00000005483	KMT2E	0.00938583	7.71576	0.996474
ENSG00000005486	RHBDD2	-0.0220878	3.41106	0.996474
ENSG00000005513	SOX8	-0.152453	-0.347263	0.996474
ENSG00000005700	IBTK	0.0261307	6.11922	0.996474
ENSG00000005801	ZNF195	0.011255	4.9355	0.996474
ENSG00000005810	MYCBP2	0.00439779	9.13262	0.996474
ENSG00000005812	FBXL3	0.00831463	7.08652	0.996474
ENSG00000005844	ITGAL	0.00929274	7.6183	0.996474
ENSG00000005882	PDK2	-0.0312295	3.23394	0.996474
ENSG00000005884	ITGA3	-0.039054	1.33229	0.996474
ENSG00000005893	LAMP2	-0.0144318	8.33075	0.996474
ENSG00000005961	ITGA2B	-0.0202695	4.7426	0.996474
ENSG00000006007	GDE1	0.00927524	6.35809	0.996474
ENSG00000006015	C19orf60	-0.0199567	3.4713	0.996474
ENSG00000006025	OSBPL7	-0.00701465	3.38239	0.996474
ENSG00000006062	MAP3K14	0.00536462	4.18557	0.996474
ENSG00000006125	AP2B1	0.0239483	7.74479	0.996474
ENSG00000006194	ZNF263	-0.0114216	5.49142	0.996474
ENSG00000006451	RALA	0.0376857	3.98312	0.996474
ENSG00000006453	BAIAP2L1	0.048076	-1.49045	0.996474
ENSG00000006530	AGK	-0.0154075	5.17182	0.996474
ENSG00000006534	ALDH3B1	-0.0157189	4.77307	0.996474
ENSG00000006607	FARP2	0.0406463	4.74854	0.996474
ENSG00000006625	GGCT	-0.0173787	1.66838	0.996474
ENSG00000006638	TBXA2R	-0.0714761	-0.162648	0.996474
ENSG00000006652	IFRD1	-0.0106825	7.2344	0.996474
ENSG00000006695	COX10	0.0160937	3.64347	0.996474
ENSG00000006704	GTF2IRD1	-0.0174822	-2.28479	0.996474
ENSG00000006712	PAF1	-0.0472829	4.49005	0.996474
ENSG00000006715	VPS41	-0.00474415	7.05318	0.996474
ENSG00000006740	ARHGAP44	0.0487771	-2.75808	0.996474
ENSG00000006744	ELAC2	-0.017415	5.63041	0.996474
ENSG00000006747	SCIN	0.110372	-1.19962	0.996474
ENSG00000006757	PNPLA4	-0.0482162	1.77463	0.996474
ENSG00000006831	ADIPOR2	-0.0152892	5.74379	0.996474
ENSG00000006837	CDKL3	0.0195096	-0.50089	0.996474
ENSG00000007038	PRSS21	0.0782219	-0.790051	0.996474
ENSG00000007047	MARK4	0.0511624	3.03856	0.996474
ENSG00000007062	PROM1	0.0215746	-1.87859	0.996474
ENSG00000007080	CCDC124	0.00822571	1.54942	0.996474
ENSG00000007129	CEACAM21	0.0171508	4.08613	0.996474
ENSG00000007168	PAFAH1B1	-0.00913344	7.14621	0.996474
ENSG00000007202	KIAA0100	-0.0129243	7.82717	0.996474
ENSG00000007237	GAS7	0.0125929	6.58266	0.996474
ENSG00000007255	TRAPPC6A	-0.0199283	2.71338	0.996474
ENSG00000007264	MATK	-0.0258275	4.2349	0.996474
ENSG00000007312	CD79B	-0.038291	5.28641	0.996474
ENSG00000007350	TKTL1	-0.0179909	2.25681	0.996474
ENSG00000007376	RPUSD1	-0.0488935	2.55996	0.996474
ENSG00000007402	CACNA2D2	-0.0333701	1.49674	0.996474
ENSG00000007516	BAIAP3	-0.0302544	2.53274	0.996474
ENSG00000007520	TSR3	-0.0407602	3.81422	0.996474
ENSG00000007541	PIGQ	0.0106157	3.24411	0.996474
ENSG00000007923	DNAJC11	-0.0105466	4.43061	0.996474
ENSG00000007944	MYLIP	-0.0487427	6.69751	0.996474
ENSG00000007968	E2F2	-0.015248	6.05198	0.996474
ENSG00000008018	PSMB1	0.0309642	5.93963	0.996474
ENSG00000008083	JARID2	-0.0146702	7.12161	0.996474
ENSG00000008128	CDK11A	0.0135005	2.27581	0.996474
ENSG00000008130	NADK	-0.0377279	7.84284	0.996474
ENSG00000008226	DLEC1	0.0190935	2.57818	0.996474
ENSG00000008282	SYPL1	-0.00606374	4.49357	0.996474
ENSG00000008283	CYB561	0.0114275	3.9229	0.996474
ENSG00000008294	SPAG9	0.0141376	8.17808	0.996474
ENSG00000008324	SS18L2	0.0377799	2.86358	0.996474
ENSG00000008382	MPND	-0.00953135	2.71282	0.996474
ENSG00000008394	MGST1	0.0251348	2.94549	0.996474
ENSG00000008405	CRY1	-0.00377882	3.90131	0.996474
ENSG00000008516	MMP25	-0.0466169	7.23254	0.996474
ENSG00000008517	IL32	0.0317359	4.61351	0.996474
ENSG00000008710	PKD1	-0.0349315	3.99621	0.996474
ENSG00000008838	MED24	-0.0309353	4.36452	0.996474
ENSG00000008853	RHOBTB2	-0.018379	2.88527	0.996474
ENSG00000008952	SEC62	0.0434504	7.04334	0.996474
ENSG00000008988	RPS20	0.0359716	7.75073	0.996474
ENSG00000009307	CSDE1	0.0169679	9.40705	0.996474
ENSG00000009335	UBE3C	0.00482836	6.90201	0.996474
ENSG00000009413	REV3L	0.019261	6.91073	0.996474
ENSG00000009694	TENM1	0.0340753	4.42358	0.996474
ENSG00000009780	FAM76A	0.0204452	3.88712	0.996474
ENSG00000009790	TRAF3IP3	0.00727463	7.88569	0.996474
ENSG00000009830	POMT2	0.0122596	2.04202	0.996474
ENSG00000009844	VTA1	0.0126832	5.28406	0.996474
ENSG00000009954	BAZ1B	-0.00702693	6.7076	0.996474
ENSG00000010017	RANBP9	0.0142917	5.68735	0.996474
ENSG00000010030	ETV7	0.0604114	2.07694	0.996474
ENSG00000010072	SPRTN	0.00475859	4.81371	0.996474
ENSG00000010165	METTL13	-0.0254312	4.6212	0.996474
ENSG00000010219	DYRK4	0.0133173	3.37422	0.996474
ENSG00000010244	ZNF207	0.0201023	8.57964	0.996474
ENSG00000010256	UQCRC1	-0.0180268	5.79062	0.996474
ENSG00000010270	STARD3NL	0.00959633	4.90582	0.996474
ENSG00000010292	NCAPD2	-0.00823864	5.83938	0.996474
ENSG00000010295	IFFO1	-0.00684762	4.6707	0.996474
ENSG00000010310	GIPR	0.0364023	0.929615	0.996474
ENSG00000010318	PHF7	0.02535	2.56455	0.996474
ENSG00000010319	SEMA3G	0.0464782	-0.234944	0.996474
ENSG00000010322	NISCH	-0.0181785	6.15264	0.996474
ENSG00000010361	FUZ	0.0114172	3.14285	0.996474
ENSG00000010379	SLC6A13	-0.0214026	-1.10851	0.996474
ENSG00000010404	IDS	0.0110947	6.70861	0.996474
ENSG00000010539	ZNF200	-0.0241919	5.49908	0.996474
ENSG00000010610	CD4	-0.0212344	6.2353	0.996474
ENSG00000010671	BTK	0.0154401	6.67678	0.996474
ENSG00000010704	HFE	-0.0177163	2.96983	0.996474
ENSG00000010803	SCMH1	-0.00705855	4.09685	0.996474
ENSG00000010810	FYN	-0.0185896	8.00837	0.996474
ENSG00000010818	HIVEP2	-0.0291289	7.44779	0.996474
ENSG00000011007	TCEB3	-0.0178614	5.28314	0.996474
ENSG00000011009	LYPLA2	-0.0232546	4.01371	0.996474
ENSG00000011021	CLCN6	0.0163871	3.95951	0.996474
ENSG00000011028	MRC2	0.0240499	4.38067	0.996474
ENSG00000011105	TSPAN9	-0.0295957	1.84488	0.996474
ENSG00000011114	BTBD7	0.0078419	5.65163	0.996474
ENSG00000011132	APBA3	-0.0192815	3.92134	0.996474
ENSG00000011143	MKS1	-0.0240404	2.79992	0.996474
ENSG00000011198	ABHD5	-0.027184	6.91051	0.996474
ENSG00000011201	KAL1	0.0485781	-1.95501	0.996474
ENSG00000011243	AKAP8L	-0.0278597	5.76276	0.996474
ENSG00000011258	MBTD1	0.01499	6.04202	0.996474
ENSG00000011275	RNF216	-0.0305187	6.63081	0.996474
ENSG00000011295	TTC19	0.00347502	4.98323	0.996474
ENSG00000011304	PTBP1	-0.0273635	6.35145	0.996474
ENSG00000011376	LARS2	-0.00796787	4.76515	0.996474
ENSG00000011405	PIK3C2A	0.00668067	6.48279	0.996474
ENSG00000011422	PLAUR	-0.0531521	5.95518	0.996474
ENSG00000011426	ANLN	0.0716203	1.49342	0.996474
ENSG00000011451	WIZ	0.00718735	2.47598	0.996474
ENSG00000011454	RABGAP1	0.00863297	6.23115	0.996474
ENSG00000011478	QPCTL	-0.0829268	0.520733	0.996474
ENSG00000011485	PPP5C	-0.00500693	4.32346	0.996474
ENSG00000011523	CEP68	0.023197	4.77712	0.996474
ENSG00000011566	MAP4K3	-0.0078923	4.2441	0.996474
ENSG00000011590	ZBTB32	0.0294194	-0.413727	0.996474
ENSG00000011600	TYROBP	-0.0406862	7.65771	0.996474
ENSG00000011638	TMEM159	-0.00600754	3.53915	0.996474
ENSG00000012048	BRCA1	0.0235625	4.44699	0.996474
ENSG00000012061	ERCC1	0.00504401	4.67063	0.996474
ENSG00000012124	CD22	0.0249977	4.5891	0.996474
ENSG00000012171	SEMA3B	-0.0691177	-0.684914	0.996474
ENSG00000012174	MBTPS2	0.00439976	3.23531	0.996474
ENSG00000012211	PRICKLE3	0.00687296	1.3599	0.996474
ENSG00000012223	LTF	0.193871	4.19241	0.996474
ENSG00000012232	EXTL3	-0.0276835	6.44067	0.996474
ENSG00000012660	ELOVL5	0.00535743	8.05947	0.996474
ENSG00000012779	ALOX5	-0.0154467	8.0769	0.996474
ENSG00000012817	KDM5D	-0.0144754	2.09379	0.996474
ENSG00000012822	CALCOCO1	0.00851206	6.88337	0.996474
ENSG00000012983	MAP4K5	0.0266894	5.95646	0.996474
ENSG00000013016	EHD3	-0.0356199	4.0648	0.996474
ENSG00000013275	PSMC4	-0.0207841	5.42375	0.996474
ENSG00000013288	MAN2B2	-0.0330517	5.92024	0.996474
ENSG00000013364	MVP	-0.00482301	7.70574	0.996474
ENSG00000013374	NUB1	-0.00320241	6.58676	0.996474
ENSG00000013375	PGM3	-0.00383872	4.75091	0.996474
ENSG00000013441	CLK1	0.0279176	8.10989	0.996474
ENSG00000013503	POLR3B	-0.00453228	4.11261	0.996474
ENSG00000013523	ANGEL1	0.00399747	4.21752	0.996474
ENSG00000013561	RNF14	0.0316561	6.42821	0.996474
ENSG00000013563	DNASE1L1	0.00953933	4.90269	0.996474
ENSG00000013573	DDX11	0.0953909	3.36452	0.996474
ENSG00000013583	HEBP1	-0.0303765	2.21683	0.996474
ENSG00000013619	MAMLD1	0.117851	0.21873	0.996474
ENSG00000013810	TACC3	-0.0368771	5.96922	0.996474
ENSG00000014123	UFL1	0.0232899	5.77062	0.996474
ENSG00000014138	POLA2	-0.00596541	4.24678	0.996474
ENSG00000014216	CAPN1	-0.0164577	5.99604	0.996474
ENSG00000014257	ACPP	0.0192015	5.43209	0.996474
ENSG00000014641	MDH1	0.0170284	5.55876	0.996474
ENSG00000014824	SLC30A9	0.0131066	5.74003	0.996474
ENSG00000014914	MTMR11	-0.00530055	4.00414	0.996474
ENSG00000014919	COX15	0.0135044	5.54387	0.996474
ENSG00000015153	YAF2	0.0144146	5.56197	0.996474
ENSG00000015171	ZMYND11	0.0230632	5.79599	0.996474
ENSG00000015285	WAS	-0.0202848	4.88632	0.996474
ENSG00000015475	BID	-0.0071673	6.58511	0.996474
ENSG00000015479	MATR3	0.0188115	5.00102	0.996474
ENSG00000015532	XYLT2	-0.0225297	4.11099	0.996474
ENSG00000015676	NUDCD3	-0.015755	6.4521	0.996474
ENSG00000016391	CHDH	0.162677	-0.828874	0.996474
ENSG00000016864	GLT8D1	0.00970644	4.92789	0.996474
ENSG00000017260	ATP2C1	0.0216279	6.25143	0.996474
ENSG00000017483	SLC38A5	0.0237745	3.58094	0.996474
ENSG00000017797	RALBP1	0.0213114	7.02494	0.996474
ENSG00000018189	RUFY3	0.0204201	5.41744	0.996474
ENSG00000018280	SLC11A1	-0.0319624	7.9204	0.996474
ENSG00000018408	WWTR1	-0.041982	-0.0428203	0.996474
ENSG00000018510	AGPS	0.0214993	5.98493	0.996474
ENSG00000018610	CXorf56	-0.0117817	3.89774	0.996474
ENSG00000018699	TTC27	0.00521428	4.48611	0.996474
ENSG00000018869	ZNF582	0.0164334	2.3147	0.996474
ENSG00000019144	PHLDB1	0.0424222	-1.27402	0.996474
ENSG00000019169	MARCO	0.0308851	2.36467	0.996474
ENSG00000019186	CYP24A1	0.0963315	-2.04951	0.996474
ENSG00000019485	PRDM11	0.021084	2.90502	0.996474
ENSG00000019582	CD74	-0.0163988	7.82766	0.996474
ENSG00000019991	HGF	0.0174304	4.08732	0.996474
ENSG00000019995	ZRANB1	0.0188357	6.66838	0.996474
ENSG00000020129	NCDN	-0.012371	2.56165	0.996474
ENSG00000020256	ZFP64	-0.00737127	3.00886	0.996474
ENSG00000020426	MNAT1	0.0189307	3.42801	0.996474
ENSG00000020577	SAMD4A	-0.0105945	3.01816	0.996474
ENSG00000020922	MRE11A	0.0112938	5.93641	0.996474
ENSG00000021300	PLEKHB1	-0.0652037	2.68211	0.996474
ENSG00000021355	SERPINB1	0.00701659	7.43504	0.996474
ENSG00000021574	SPAST	0.0103293	5.86984	0.996474
ENSG00000021645	NRXN3	0.193873	0.858276	0.996474
ENSG00000021826	CPS1	0.0748721	-0.688543	0.996474
ENSG00000022267	FHL1	-0.0318941	4.03911	0.996474
ENSG00000022277	RTFDC1	-0.021577	6.9542	0.996474
ENSG00000022556	NLRP2	0.0501031	2.1854	0.996474
ENSG00000022567	SLC45A4	-0.0502985	6.90403	0.996474
ENSG00000022840	RNF10	0.0232763	9.05504	0.996474
ENSG00000022976	ZNF839	-0.014143	4.11654	0.996474
ENSG00000023041	ZDHHC6	0.0193418	5.76707	0.996474
ENSG00000023171	GRAMD1B	-0.0276873	3.56489	0.996474
ENSG00000023191	RNH1	-0.0336827	5.88881	0.996474
ENSG00000023228	NDUFS1	0.00262066	6.5809	0.996474
ENSG00000023287	RB1CC1	0.0194739	7.49746	0.996474
ENSG00000023318	ERP44	0.00637204	6.24705	0.996474
ENSG00000023330	ALAS1	-0.00996659	4.81126	0.996474
ENSG00000023445	BIRC3	0.033532	7.85322	0.996474
ENSG00000023516	AKAP11	0.00638295	6.76284	0.996474
ENSG00000023572	GLRX2	0.0771607	2.20324	0.996474
ENSG00000023608	SNAPC1	0.0111301	1.83979	0.996474
ENSG00000023697	DERA	0.007246	4.38475	0.996474
ENSG00000023734	STRAP	0.0265543	3.80729	0.996474
ENSG00000023839	ABCC2	-0.028743	3.04012	0.996474
ENSG00000023892	DEF6	-0.0310131	7.01572	0.996474
ENSG00000023902	PLEKHO1	-0.0234782	7.10764	0.996474
ENSG00000023909	GCLM	0.0174726	4.38479	0.996474
ENSG00000024048	UBR2	0.0118846	8.98491	0.996474
ENSG00000024526	DEPDC1	0.207548	-0.966274	0.996474
ENSG00000025039	RRAGD	0.0167027	5.0953	0.996474
ENSG00000025156	HSF2	-0.0139953	4.03676	0.996474
ENSG00000025293	PHF20	-0.0104396	6.93995	0.996474
ENSG00000025434	NR1H3	0.00788129	1.51141	0.996474
ENSG00000025708	TYMP	-0.0264314	6.97562	0.996474
ENSG00000025770	NCAPH2	-0.0216514	4.36988	0.996474
ENSG00000025772	TOMM34	-0.0430039	3.3017	0.996474
ENSG00000025796	SEC63	0.0225133	5.44937	0.996474
ENSG00000025800	KPNA6	-0.00466457	6.3647	0.996474
ENSG00000026025	VIM	0.0153489	10.1683	0.996474
ENSG00000026103	FAS	0.0434879	6.53614	0.996474
ENSG00000026297	RNASET2	-0.00883394	7.6737	0.996474
ENSG00000026508	CD44	0.0128479	8.53466	0.996474
ENSG00000026559	KCNG1	-0.0351864	-0.0905614	0.996474
ENSG00000026652	AGPAT4	-0.0122765	4.99762	0.996474
ENSG00000026751	SLAMF7	0.00727121	5.82776	0.996474
ENSG00000026950	BTN3A1	0.00858759	8.21384	0.996474
ENSG00000027001	MIPEP	-0.0187882	3.13931	0.996474
ENSG00000027075	PRKCH	-0.00330738	7.87216	0.996474
ENSG00000027697	IFNGR1	0.00492603	7.91861	0.996474
ENSG00000027847	B4GALT7	-0.0176825	3.17823	0.996474
ENSG00000027869	SH2D2A	-0.0380627	2.4843	0.996474
ENSG00000028116	VRK2	0.0193453	4.9602	0.996474
ENSG00000028137	TNFRSF1B	-0.0421888	8.35583	0.996474
ENSG00000028203	VEZT	0.0268047	5.40022	0.996474
ENSG00000028277	POU2F2	-0.0142118	4.62665	0.996474
ENSG00000028310	BRD9	0.0029578	5.57733	0.996474
ENSG00000028528	SNX1	0.0033836	7.23186	0.996474
ENSG00000028839	TBPL1	0.00569653	4.97689	0.996474
ENSG00000029153	ARNTL2	0.0801171	0.964464	0.996474
ENSG00000029363	BCLAF1	0.00900576	8.27116	0.996474
ENSG00000029534	ANK1	0.0495985	6.46402	0.996474
ENSG00000029639	TFB1M	-0.0231987	4.15685	0.996474
ENSG00000029993	HMGB3	0.0716628	0.650919	0.996474
ENSG00000030066	NUP160	-0.00392834	6.25717	0.996474
ENSG00000030110	BAK1	0.0249415	4.55413	0.996474
ENSG00000030582	GRN	-0.0501469	6.87408	0.996474
ENSG00000031003	FAM13B	0.0178817	6.72241	0.996474
ENSG00000031081	ARHGAP31	0.00695253	4.81429	0.996474
ENSG00000031691	CENPQ	0.0110746	1.37923	0.996474
ENSG00000031698	SARS	-0.0166933	6.70341	0.996474
ENSG00000031823	RANBP3	-0.0273919	5.27722	0.996474
ENSG00000032219	ARID4A	0.0295776	7.10782	0.996474
ENSG00000032389	TSSC1	-0.0306758	4.30834	0.996474
ENSG00000032444	PNPLA6	-0.012135	5.16161	0.996474
ENSG00000032742	IFT88	0.0337946	4.03306	0.996474
ENSG00000033011	ALG1	-0.0286914	3.81706	0.996474
ENSG00000033030	ZCCHC8	0.0152512	4.78997	0.996474
ENSG00000033050	ABCF2	-0.0281863	4.39493	0.996474
ENSG00000033100	CHPF2	-0.0156156	5.57129	0.996474
ENSG00000033122	LRRC7	0.0328604	-0.228877	0.996474
ENSG00000033170	FUT8	0.00503651	5.17762	0.996474
ENSG00000033178	UBA6	0.0301982	6.65729	0.996474
ENSG00000033327	GAB2	-0.0338501	6.77029	0.996474
ENSG00000033627	ATP6V0A1	0.00579316	5.62648	0.996474
ENSG00000033867	SLC4A7	0.0397873	6.74804	0.996474
ENSG00000034053	APBA2	-0.0193699	5.07015	0.996474
ENSG00000034152	MAP2K3	0.0228861	6.63268	0.996474
ENSG00000034239	EFCAB1	0.0873444	-2.22741	0.996474
ENSG00000034510	TMSB10	0.0224533	8.95511	0.996474
ENSG00000034533	ASTE1	0.0128628	5.00993	0.996474
ENSG00000034677	RNF19A	0.0315586	7.3324	0.996474
ENSG00000034713	GABARAPL2	0.0294703	6.57131	0.996474
ENSG00000035115	SH3YL1	-0.00844545	5.4775	0.996474
ENSG00000035141	FAM136A	0.00443966	4.00995	0.996474
ENSG00000035403	VCL	-0.028641	8.03222	0.996474
ENSG00000035499	DEPDC1B	0.0261083	0.374341	0.996474
ENSG00000035664	DAPK2	-0.0172381	6.19067	0.996474
ENSG00000035681	NSMAF	0.00712565	6.26711	0.996474
ENSG00000035687	ADSS	0.0268853	6.16532	0.996474
ENSG00000035720	STAP1	-0.0218238	3.12057	0.996474
ENSG00000035862	TIMP2	-0.0274987	5.06892	0.996474
ENSG00000035928	RFC1	0.00944424	6.27491	0.996474
ENSG00000036054	TBC1D23	0.0302614	6.05604	0.996474
ENSG00000036257	CUL3	0.0140813	7.15248	0.996474
ENSG00000036448	MYOM2	-0.0596925	2.57926	0.996474
ENSG00000036530	CYP46A1	-0.035883	-1.38933	0.996474
ENSG00000036549	ZZZ3	0.00376463	6.1983	0.996474
ENSG00000036565	SLC18A1	-0.0272968	-1.21162	0.996474
ENSG00000037280	FLT4	-0.0567811	1.08846	0.996474
ENSG00000037474	NSUN2	-0.0229972	6.18057	0.996474
ENSG00000037637	FBXO42	-0.00444131	5.85655	0.996474
ENSG00000037757	MRI1	-0.0277511	4.40414	0.996474
ENSG00000037897	METTL1	-0.0919068	0.716271	0.996474
ENSG00000038002	AGA	0.0181003	4.16811	0.996474
ENSG00000038274	MAT2B	0.00530845	7.45627	0.996474
ENSG00000038358	EDC4	-0.015466	4.52747	0.996474
ENSG00000038532	CLEC16A	0.0126349	5.85107	0.996474
ENSG00000038945	MSR1	-0.0202496	2.59825	0.996474
ENSG00000039068	CDH1	0.0191782	2.7931	0.996474
ENSG00000039123	SKIV2L2	0.0223355	6.39495	0.996474
ENSG00000039319	ZFYVE16	0.00736456	7.41438	0.996474
ENSG00000039560	RAI14	-0.112137	-1.00274	0.996474
ENSG00000039650	PNKP	-0.00914053	4.47391	0.996474
ENSG00000040199	PHLPP2	0.0243852	5.30552	0.996474
ENSG00000040275	SPDL1	0.0180857	2.69448	0.996474
ENSG00000040487	PQLC2	0.0186736	2.30405	0.996474
ENSG00000040531	CTNS	-0.0189726	3.53361	0.996474
ENSG00000040633	PHF23	-0.0299018	5.40428	0.996474
ENSG00000040933	INPP4A	-0.00366463	7.96563	0.996474
ENSG00000041353	RAB27B	-0.0210874	5.62297	0.996474
ENSG00000041357	PSMA4	0.0560534	5.34536	0.996474
ENSG00000041515	MYO16	0.252427	0.647825	0.996474
ENSG00000041988	THAP3	0.0238661	3.12589	0.996474
ENSG00000042062	FAM65C	0.0579032	1.49561	0.996474
ENSG00000042088	TDP1	-0.00984452	5.1816	0.996474
ENSG00000042286	AIFM2	0.0142237	1.4416	0.996474
ENSG00000042317	SPATA7	0.016039	2.16297	0.996474
ENSG00000042429	MED17	0.00406707	6.04676	0.996474
ENSG00000042445	RETSAT	-0.031261	4.45827	0.996474
ENSG00000042493	CAPG	0.00634638	5.27108	0.996474
ENSG00000042753	AP2S1	-0.00942246	5.16033	0.996474
ENSG00000042832	TG	-0.0453692	3.56913	0.996474
ENSG00000042980	ADAM28	-0.0122724	5.6557	0.996474
ENSG00000043093	DCUN1D1	0.0199069	6.71377	0.996474
ENSG00000043143	JADE2	-0.0352386	6.39148	0.996474
ENSG00000043462	LCP2	0.00505927	8.18359	0.996474
ENSG00000043591	ADRB1	0.177273	-1.42571	0.996474
ENSG00000044115	CTNNA1	-0.00705844	6.90358	0.996474
ENSG00000044459	CNTLN	0.0229316	3.72552	0.996474
ENSG00000044574	HSPA5	-0.0093824	6.59751	0.996474
ENSG00000046604	DSG2	0.180781	-1.73988	0.996474
ENSG00000046647	GEMIN8	0.0215614	3.14552	0.996474
ENSG00000046651	OFD1	0.0169821	6.08363	0.996474
ENSG00000046653	GPM6B	0.118685	-2.01828	0.996474
ENSG00000047056	WDR37	-0.00817177	6.32678	0.996474
ENSG00000047249	ATP6V1H	-0.0158101	5.28414	0.996474
ENSG00000047315	POLR2B	0.0158745	7.50398	0.996474
ENSG00000047346	FAM214A	0.0154677	6.91221	0.996474
ENSG00000047365	ARAP2	0.0253248	7.98892	0.996474
ENSG00000047410	TPR	0.0077071	8.67323	0.996474
ENSG00000047578	KIAA0556	0.0126638	5.00484	0.996474
ENSG00000047579	DTNBP1	-0.0126006	3.82309	0.996474
ENSG00000047597	XK	0.0420557	5.62088	0.996474
ENSG00000047617	ANO2	-0.0604054	-1.74019	0.996474
ENSG00000047621	C12orf4	0.0486313	4.33173	0.996474
ENSG00000047634	SCML1	-0.0409791	3.27961	0.996474
ENSG00000047644	WWC3	-0.0100823	6.32935	0.996474
ENSG00000047849	MAP4	0.0283755	5.41893	0.996474
ENSG00000047932	GOPC	0.0100182	5.72728	0.996474
ENSG00000048052	HDAC9	0.0136361	5.67408	0.996474
ENSG00000048140	TSPAN17	0.00757191	4.55746	0.996474
ENSG00000048162	NOP16	0.00915317	2.48319	0.996474
ENSG00000048342	CC2D2A	-0.105697	-0.0841174	0.996474
ENSG00000048392	RRM2B	0.00972385	6.60052	0.996474
ENSG00000048405	ZNF800	-0.00920348	6.46671	0.996474
ENSG00000048462	TNFRSF17	0.0634801	0.17019	0.996474
ENSG00000048471	SNX29	-0.0125748	6.14258	0.996474
ENSG00000048544	MRPS10	0.0080654	4.80555	0.996474
ENSG00000048649	RSF1	0.00698967	6.99288	0.996474
ENSG00000048740	CELF2	-0.00565396	9.01583	0.996474
ENSG00000048828	FAM120A	-0.00371394	7.62602	0.996474
ENSG00000048991	R3HDM1	0.0194071	4.6379	0.996474
ENSG00000049089	COL9A2	-0.0173	2.05773	0.996474
ENSG00000049167	ERCC8	0.0165219	3.64455	0.996474
ENSG00000049192	ADAMTS6	-0.0734649	2.03694	0.996474
ENSG00000049239	H6PD	0.0118667	5.34582	0.996474
ENSG00000049245	VAMP3	-0.00926082	6.37267	0.996474
ENSG00000049246	PER3	-0.0262483	2.85123	0.996474
ENSG00000049247	UTS2	0.175251	-0.0809896	0.996474
ENSG00000049323	LTBP1	-0.0159819	4.45533	0.996474
ENSG00000049449	RCN1	-0.013893	3.24635	0.996474
ENSG00000049541	RFC2	-0.0158392	4.09291	0.996474
ENSG00000049618	ARID1B	-0.012609	6.62273	0.996474
ENSG00000049656	CLPTM1L	-0.00368538	5.90112	0.996474
ENSG00000049759	NEDD4L	0.0469786	3.73226	0.996474
ENSG00000049768	FOXP3	0.0497234	-0.345624	0.996474
ENSG00000049769	PPP1R3F	-0.00677776	2.82971	0.996474
ENSG00000049883	PTCD2	-0.00440172	4.02343	0.996474
ENSG00000050030	KIAA2022	-0.0587973	1.64544	0.996474
ENSG00000050130	JKAMP	0.0246951	5.5845	0.996474
ENSG00000050165	DKK3	0.0780389	-0.524941	0.996474
ENSG00000050438	SLC4A8	0.0102646	3.83222	0.996474
ENSG00000050555	LAMC3	-0.0320016	-1.74472	0.996474
ENSG00000050628	PTGER3	0.136455	-0.525787	0.996474
ENSG00000050730	TNIP3	-0.0916603	0.948762	0.996474
ENSG00000050748	MAPK9	0.0232844	5.22887	0.996474
ENSG00000050767	COL23A1	0.020666	-2.15872	0.996474
ENSG00000051009	FAM160A2	-0.0128056	5.24407	0.996474
ENSG00000051128	HOMER3	-0.0767022	2.22128	0.996474
ENSG00000051180	RAD51	0.0647246	-0.17209	0.996474
ENSG00000051341	POLQ	0.0287103	2.31083	0.996474
ENSG00000051382	PIK3CB	0.0105903	6.04731	0.996474
ENSG00000051523	CYBA	-0.0458142	7.08284	0.996474
ENSG00000051596	THOC3	-0.0274145	3.29772	0.996474
ENSG00000051620	HEBP2	0.0113081	7.04092	0.996474
ENSG00000051825	MPHOSPH9	0.0170688	5.91379	0.996474
ENSG00000052126	PLEKHA5	0.0423797	3.04517	0.996474
ENSG00000052723	SIKE1	0.0165059	5.66057	0.996474
ENSG00000052795	FNIP2	0.0155714	5.19054	0.996474
ENSG00000052802	MSMO1	0.0397109	3.81508	0.996474
ENSG00000052841	TTC17	0.0112464	7.52759	0.996474
ENSG00000053108	FSTL4	-0.0324566	-0.997184	0.996474
ENSG00000053254	FOXN3	-0.00701154	7.49767	0.996474
ENSG00000053328	METTL24	-0.0523486	-1.9201	0.996474
ENSG00000053371	AKR7A2	-0.0236375	3.92113	0.996474
ENSG00000053372	MRTO4	-0.0213281	3.48986	0.996474
ENSG00000053501	USE1	-0.0574215	2.13611	0.996474
ENSG00000053770	AP5M1	0.0118791	6.72251	0.996474
ENSG00000053900	ANAPC4	0.0322067	5.55806	0.996474
ENSG00000053918	KCNQ1	-0.0588198	4.88112	0.996474
ENSG00000054116	TRAPPC3	-0.0151717	5.26589	0.996474
ENSG00000054118	THRAP3	-0.0069138	7.89288	0.996474
ENSG00000054148	PHPT1	-0.0101265	2.75347	0.996474
ENSG00000054179	ENTPD2	0.066753	-2.35249	0.996474
ENSG00000054219	LY75	-0.00503778	5.05	0.996474
ENSG00000054267	ARID4B	0.00926862	7.78456	0.996474
ENSG00000054277	OPN3	0.0115251	3.83105	0.996474
ENSG00000054282	SDCCAG8	-0.00692158	5.15369	0.996474
ENSG00000054392	HHAT	0.0298567	2.91748	0.996474
ENSG00000054523	KIF1B	0.0187146	6.37932	0.996474
ENSG00000054611	TBC1D22A	-0.0167122	6.04318	0.996474
ENSG00000054654	SYNE2	0.041963	10.0346	0.996474
ENSG00000054965	FAM168A	-0.0198657	5.48183	0.996474
ENSG00000054967	RELT	-0.0246046	6.80615	0.996474
ENSG00000054983	GALC	0.00914179	6.03697	0.996474
ENSG00000055044	NOP58	0.00642003	5.45802	0.996474
ENSG00000055070	SZRD1	-0.0162263	5.9704	0.996474
ENSG00000055118	KCNH2	0.0385264	1.42061	0.996474
ENSG00000055130	CUL1	-0.0063773	6.17463	0.996474
ENSG00000055163	CYFIP2	-0.0110176	8.33362	0.996474
ENSG00000055208	TAB2	0.00862799	7.54015	0.996474
ENSG00000055211	GINM1	0.0312834	4.55205	0.996474
ENSG00000055332	EIF2AK2	-0.0286143	6.71533	0.996474
ENSG00000055483	USP36	-0.00902269	4.54619	0.996474
ENSG00000055732	MCOLN3	0.169738	0.403279	0.996474
ENSG00000055950	MRPL43	-0.00876864	4.14593	0.996474
ENSG00000055955	ITIH4	0.0636684	-0.438136	0.996474
ENSG00000055957	ITIH1	0.139788	-1.50468	0.996474
ENSG00000056050	C4orf27	0.0139159	2.65446	0.996474
ENSG00000056097	ZFR	0.00424079	7.19092	0.996474
ENSG00000056277	ZNF280C	0.0198782	2.96213	0.996474
ENSG00000056558	TRAF1	0.0178367	6.44306	0.996474
ENSG00000056586	RC3H2	0.0118114	7.28664	0.996474
ENSG00000056736	IL17RB	0.0479738	-1.0922	0.996474
ENSG00000056972	TRAF3IP2	-0.0353239	2.58635	0.996474
ENSG00000057019	DCBLD2	-0.0506355	1.20403	0.996474
ENSG00000057252	SOAT1	-0.00946321	6.66619	0.996474
ENSG00000057294	PKP2	0.0762297	0.888895	0.996474
ENSG00000057468	MSH4	-0.019098	0.176669	0.996474
ENSG00000057608	GDI2	0.0185089	7.73961	0.996474
ENSG00000057657	PRDM1	0.0161952	5.28008	0.996474
ENSG00000057663	ATG5	0.0256919	5.04848	0.996474
ENSG00000057704	TMCC3	-0.0361376	6.84438	0.996474
ENSG00000057757	PITHD1	0.0461528	7.11593	0.996474
ENSG00000057935	MTA3	-0.0193106	3.69459	0.996474
ENSG00000058063	ATP11B	0.0105618	8.34669	0.996474
ENSG00000058091	CDK14	-0.0123473	5.35619	0.996474
ENSG00000058262	SEC61A1	-0.0144684	7.0378	0.996474
ENSG00000058272	PPP1R12A	0.0153794	8.22975	0.996474
ENSG00000058600	POLR3E	-0.0231871	5.34303	0.996474
ENSG00000058668	ATP2B4	0.0167299	7.32854	0.996474
ENSG00000058673	ZC3H11A	-0.00226365	8.31377	0.996474
ENSG00000058729	RIOK2	0.0191959	4.29557	0.996474
ENSG00000058799	YIPF1	-0.015723	5.28459	0.996474
ENSG00000059145	UNKL	-0.0134918	4.75634	0.996474
ENSG00000059377	TBXAS1	-0.00500545	7.98449	0.996474
ENSG00000059378	PARP12	-0.0281807	6.44525	0.996474
ENSG00000059573	ALDH18A1	-0.0225323	4.30939	0.996474
ENSG00000059588	TARBP1	0.0207772	5.63022	0.996474
ENSG00000059691	GATB	-0.0147282	3.71553	0.996474
ENSG00000059728	MXD1	-0.0307741	9.65107	0.996474
ENSG00000059758	CDK17	-0.0115689	6.87279	0.996474
ENSG00000059769	DNAJC25	-0.0181761	2.30858	0.996474
ENSG00000059804	SLC2A3	-0.057139	8.63109	0.996474
ENSG00000059915	PSD	-0.103357	-0.149432	0.996474
ENSG00000060069	CTDP1	-0.0347348	5.93282	0.996474
ENSG00000060138	YBX3	0.0622758	8.9668	0.996474
ENSG00000060140	STYK1	0.0387944	1.42989	0.996474
ENSG00000060237	WNK1	0.0151978	8.79279	0.996474
ENSG00000060339	CCAR1	0.00667359	6.45743	0.996474
ENSG00000060491	OGFR	-0.0340046	6.50788	0.996474
ENSG00000060558	GNA15	-0.00535496	3.97498	0.996474
ENSG00000060642	PIGV	-0.0249667	4.3132	0.996474
ENSG00000060656	PTPRU	-0.100816	-2.08798	0.996474
ENSG00000060688	SNRNP40	0.006259	5.37754	0.996474
ENSG00000060709	RIMBP2	0.0934281	-2.59764	0.996474
ENSG00000060762	MPC1	0.0168144	4.09021	0.996474
ENSG00000060971	ACAA1	-0.00628983	6.2112	0.996474
ENSG00000060982	BCAT1	0.0131233	3.70097	0.996474
ENSG00000061273	HDAC7	-0.0191479	5.9208	0.996474
ENSG00000061337	LZTS1	0.0898903	-1.94981	0.996474
ENSG00000061794	MRPS35	0.0106966	4.40681	0.996474
ENSG00000061918	GUCY1B3	0.0128478	3.41118	0.996474
ENSG00000061936	SFSWAP	-0.0116651	6.49287	0.996474
ENSG00000061938	TNK2	-0.00984914	5.58956	0.996474
ENSG00000061987	MON2	0.0134001	7.68731	0.996474
ENSG00000062194	GPBP1	0.00938447	7.39554	0.996474
ENSG00000062282	DGAT2	-0.0648132	7.17384	0.996474
ENSG00000062370	ZNF112	-0.12189	-0.106783	0.996474
ENSG00000062485	CS	0.022686	5.11238	0.996474
ENSG00000062524	LTK	-0.142813	1.47902	0.996474
ENSG00000062582	MRPS24	-0.0617087	-0.287728	0.996474
ENSG00000062598	ELMO2	-0.00786656	6.4111	0.996474
ENSG00000062650	WAPAL	0.00368027	7.58018	0.996474
ENSG00000062716	VMP1	0.0263415	9.00198	0.996474
ENSG00000062725	APPBP2	-0.0108649	6.02741	0.996474
ENSG00000062822	POLD1	-0.0359283	3.15191	0.996474
ENSG00000063046	EIF4B	0.0149577	8.95062	0.996474
ENSG00000063127	SLC6A16	0.0205621	2.32555	0.996474
ENSG00000063169	GLTSCR1	0.0158346	1.37115	0.996474
ENSG00000063176	SPHK2	-0.0464223	2.17316	0.996474
ENSG00000063177	RPL18	-0.0143655	8.27222	0.996474
ENSG00000063244	U2AF2	-0.0361415	5.78147	0.996474
ENSG00000063245	EPN1	0.007841	4.45292	0.996474
ENSG00000063322	MED29	-0.0276871	4.83257	0.996474
ENSG00000063587	ZNF275	-0.034122	4.39934	0.996474
ENSG00000063601	MTMR1	-0.0137416	6.18938	0.996474
ENSG00000063660	GPC1	0.0562614	-2.10371	0.996474
ENSG00000063761	ADCK1	-0.00996994	1.96806	0.996474
ENSG00000063854	HAGH	-0.0118242	6.7869	0.996474
ENSG00000063978	RNF4	-0.0103815	6.70015	0.996474
ENSG00000064012	CASP8	0.0162337	8.28528	0.996474
ENSG00000064042	LIMCH1	0.0984349	-1.3355	0.996474
ENSG00000064102	ASUN	0.0197556	4.55436	0.996474
ENSG00000064115	TM7SF3	0.0159021	5.30763	0.996474
ENSG00000064201	TSPAN32	-0.0265753	5.07124	0.996474
ENSG00000064225	ST3GAL6	0.0360215	5.03114	0.996474
ENSG00000064309	CDON	0.00990783	0.8279	0.996474
ENSG00000064313	TAF2	0.016315	6.09535	0.996474
ENSG00000064393	HIPK2	-0.0141958	6.06005	0.996474
ENSG00000064419	TNPO3	0.00420521	6.85538	0.996474
ENSG00000064490	RFXANK	-0.0230064	4.41357	0.996474
ENSG00000064545	TMEM161A	-0.042863	1.60563	0.996474
ENSG00000064547	LPAR2	-0.0167721	4.51889	0.996474
ENSG00000064601	CTSA	-0.0454449	6.24983	0.996474
ENSG00000064607	SUGP2	-0.00331031	6.6714	0.996474
ENSG00000064651	SLC12A2	0.0153009	4.40792	0.996474
ENSG00000064666	CNN2	-0.0571522	7.02849	0.996474
ENSG00000064687	ABCA7	-0.0585114	6.39875	0.996474
ENSG00000064703	DDX20	0.00769385	5.06972	0.996474
ENSG00000064726	BTBD1	0.0198371	5.90058	0.996474
ENSG00000064886	CHI3L2	-0.0938439	3.34194	0.996474
ENSG00000064932	SBNO2	-0.0258295	6.4839	0.996474
ENSG00000064933	PMS1	0.0272709	4.55987	0.996474
ENSG00000064961	HMG20B	-0.0133294	3.72009	0.996474
ENSG00000064989	CALCRL	0.0277539	1.97651	0.996474
ENSG00000064995	TAF11	0.0114143	4.37002	0.996474
ENSG00000064999	ANKS1A	-0.0202709	5.09079	0.996474
ENSG00000065000	AP3D1	-0.0205323	6.07343	0.996474
ENSG00000065029	ZNF76	-0.0276283	4.45434	0.996474
ENSG00000065054	SLC9A3R2	-0.0340405	-1.78977	0.996474
ENSG00000065060	UHRF1BP1	0.0252571	5.03425	0.996474
ENSG00000065135	GNAI3	0.0226895	8.18177	0.996474
ENSG00000065154	OAT	0.0120786	5.43678	0.996474
ENSG00000065243	PKN2	0.0195221	7.33264	0.996474
ENSG00000065268	WDR18	-0.0271404	2.75866	0.996474
ENSG00000065308	TRAM2	-0.0050547	4.23926	0.996474
ENSG00000065357	DGKA	-0.0233145	7.09542	0.996474
ENSG00000065361	ERBB3	0.0794207	-2.23013	0.996474
ENSG00000065413	ANKRD44	0.00345675	9.5012	0.996474
ENSG00000065457	ADAT1	0.0129356	5.58488	0.996474
ENSG00000065485	PDIA5	-0.0390195	1.98528	0.996474
ENSG00000065491	TBC1D22B	0.0237781	5.02197	0.996474
ENSG00000065518	NDUFB4	-0.0122287	4.77955	0.996474
ENSG00000065526	SPEN	-0.00538473	7.75572	0.996474
ENSG00000065534	MYLK	-0.0597409	4.4422	0.996474
ENSG00000065548	ZC3H15	0.0324919	5.32988	0.996474
ENSG00000065559	MAP2K4	-0.0128008	6.72249	0.996474
ENSG00000065600	TMEM206	0.00570414	3.89757	0.996474
ENSG00000065613	SLK	0.0284341	7.43738	0.996474
ENSG00000065615	CYB5R4	0.012023	7.57554	0.996474
ENSG00000065618	COL17A1	0.227917	-1.0792	0.996474
ENSG00000065621	GSTO2	0.0608103	0.756537	0.996474
ENSG00000065665	SEC61A2	0.0193455	3.56301	0.996474
ENSG00000065675	PRKCQ	-0.00844316	6.25659	0.996474
ENSG00000065717	TLE2	-0.0670488	-0.167053	0.996474
ENSG00000065802	ASB1	-0.0167735	5.27241	0.996474
ENSG00000065809	FAM107B	0.0151004	7.81982	0.996474
ENSG00000065833	ME1	0.024373	0.516267	0.996474
ENSG00000065882	TBC1D1	-0.0178646	7.49128	0.996474
ENSG00000065911	MTHFD2	0.0317379	4.98312	0.996474
ENSG00000065923	SLC9A7	0.0101059	5.03405	0.996474
ENSG00000065989	PDE4A	-0.033038	1.01314	0.996474
ENSG00000066027	PPP2R5A	-0.0210527	7.07078	0.996474
ENSG00000066044	ELAVL1	-0.00281294	4.90929	0.996474
ENSG00000066056	TIE1	0.0544363	-1.79919	0.996474
ENSG00000066084	DIP2B	-0.030941	7.99106	0.996474
ENSG00000066135	KDM4A	-0.0116672	6.26198	0.996474
ENSG00000066136	NFYC	-0.00890493	5.60643	0.996474
ENSG00000066185	ZMYND12	-0.124776	-0.811146	0.996474
ENSG00000066279	ASPM	0.0651738	2.86807	0.996474
ENSG00000066294	CD84	0.0124153	7.12083	0.996474
ENSG00000066322	ELOVL1	-0.0160762	5.49613	0.996474
ENSG00000066336	SPI1	-0.041058	5.81316	0.996474
ENSG00000066379	ZNRD1	0.00631446	4.05138	0.996474
ENSG00000066382	MPPED2	0.0322909	-1.43609	0.996474
ENSG00000066422	ZBTB11	-0.00684272	6.56686	0.996474
ENSG00000066427	ATXN3	0.021231	5.906	0.996474
ENSG00000066455	GOLGA5	0.022476	5.66258	0.996474
ENSG00000066468	FGFR2	0.0690076	1.42592	0.996474
ENSG00000066557	LRRC40	0.0293866	4.15502	0.996474
ENSG00000066583	ISOC1	-0.0305899	3.65051	0.996474
ENSG00000066697	MSANTD3	0.0233762	2.79861	0.996474
ENSG00000066735	KIF26A	0.171745	-1.73252	0.996474
ENSG00000066739	ATG2B	0.00863994	7.12276	0.996474
ENSG00000066777	ARFGEF1	0.0151745	7.83486	0.996474
ENSG00000066827	ZFAT	-0.0431376	5.32455	0.996474
ENSG00000066855	MTFR1	0.00729727	2.70097	0.996474
ENSG00000066926	FECH	0.0536863	7.52155	0.996474
ENSG00000066933	MYO9A	0.00984336	6.59597	0.996474
ENSG00000067064	IDI1	0.0209778	5.24747	0.996474
ENSG00000067082	KLF6	0.0136403	8.66617	0.996474
ENSG00000067113	PPAP2A	-0.056218	1.85954	0.996474
ENSG00000067141	NEO1	-0.0318549	3.16393	0.996474
ENSG00000067167	TRAM1	0.0364149	7.2432	0.996474
ENSG00000067182	TNFRSF1A	-0.028761	6.74716	0.996474
ENSG00000067191	CACNB1	0.0546035	2.14778	0.996474
ENSG00000067208	EVI5	-0.0088714	5.44129	0.996474
ENSG00000067221	STOML1	-0.0264575	2.44868	0.996474
ENSG00000067225	PKM	-0.0139021	6.65981	0.996474
ENSG00000067248	DHX29	0.0387011	5.48936	0.996474
ENSG00000067334	DNTTIP2	0.0180902	5.36652	0.996474
ENSG00000067365	METTL22	-0.0346846	4.90269	0.996474
ENSG00000067369	TP53BP1	-0.00336499	6.04681	0.996474
ENSG00000067445	TRO	0.0684855	-0.939225	0.996474
ENSG00000067560	RHOA	-0.0147687	8.94596	0.996474
ENSG00000067596	DHX8	-0.0203755	7.07419	0.996474
ENSG00000067601	PMS2P4	0.019135	1.21427	0.996474
ENSG00000067606	PRKCZ	-0.00654668	3.86909	0.996474
ENSG00000067646	ZFY	0.0240916	0.95397	0.996474
ENSG00000067704	IARS2	-0.008067	6.03943	0.996474
ENSG00000067715	SYT1	-0.17338	-1.41598	0.996474
ENSG00000067798	NAV3	-0.0193042	1.2871	0.996474
ENSG00000067829	IDH3G	-0.0446662	4.70656	0.996474
ENSG00000067836	ROGDI	0.0131077	4.12291	0.996474
ENSG00000067840	PDZD4	-0.0286898	3.88101	0.996474
ENSG00000067900	ROCK1	0.0081154	7.97722	0.996474
ENSG00000067955	CBFB	0.0115981	5.90449	0.996474
ENSG00000067992	PDK3	-0.0170525	5.61984	0.996474
ENSG00000068001	HYAL2	-0.034742	2.52979	0.996474
ENSG00000068028	RASSF1	0.0140942	6.29266	0.996474
ENSG00000068079	IFI35	-0.0313873	4.92247	0.996474
ENSG00000068137	PLEKHH3	-0.1324	-2.23237	0.996474
ENSG00000068305	MEF2A	0.00598199	6.35166	0.996474
ENSG00000068308	OTUD5	-0.0170319	5.25575	0.996474
ENSG00000068323	TFE3	-0.0284265	5.83319	0.996474
ENSG00000068366	ACSL4	0.0112933	7.51813	0.996474
ENSG00000068383	INPP5A	-0.0236025	5.11373	0.996474
ENSG00000068400	GRIPAP1	-0.0169883	5.38956	0.996474
ENSG00000068489	PRR11	-0.00925839	1.62692	0.996474
ENSG00000068615	REEP1	-0.0460897	-1.76611	0.996474
ENSG00000068650	ATP11A	-0.0123045	6.94989	0.996474
ENSG00000068697	LAPTM4A	0.0143149	5.62579	0.996474
ENSG00000068724	TTC7A	-0.0146429	5.98194	0.996474
ENSG00000068745	IP6K2	-0.00946477	5.55744	0.996474
ENSG00000068784	SRBD1	0.0210565	5.7482	0.996474
ENSG00000068831	RASGRP2	-0.0470148	7.41286	0.996474
ENSG00000068878	PSME4	0.00673799	7.39468	0.996474
ENSG00000068885	IFT80	0.0357591	3.70398	0.996474
ENSG00000068903	SIRT2	-0.0349342	4.58483	0.996474
ENSG00000068912	ERLEC1	0.0165542	4.83322	0.996474
ENSG00000068971	PPP2R5B	0.0102707	4.71019	0.996474
ENSG00000068976	PYGM	-0.0331152	2.10564	0.996474
ENSG00000069188	SDK2	0.0265728	1.19944	0.996474
ENSG00000069248	NUP133	-0.00754741	6.08762	0.996474
ENSG00000069345	DNAJA2	0.0169155	6.31913	0.996474
ENSG00000069399	BCL3	-0.0252526	3.24658	0.996474
ENSG00000069424	KCNAB2	-0.0127879	6.82485	0.996474
ENSG00000069493	CLEC2D	0.00813542	7.93702	0.996474
ENSG00000069509	FUNDC1	-0.0243753	2.40074	0.996474
ENSG00000069535	MAOB	0.0217138	-1.69076	0.996474
ENSG00000069667	RORA	0.0173634	8.03076	0.996474
ENSG00000069712	KIAA1107	-0.0196055	2.99962	0.996474
ENSG00000069849	ATP1B3	-0.00563205	5.1083	0.996474
ENSG00000069869	NEDD4	0.0207346	3.71738	0.996474
ENSG00000069943	PIGB	0.0321095	5.87068	0.996474
ENSG00000069956	MAPK6	0.0251247	4.81673	0.996474
ENSG00000069966	GNB5	-0.00369767	5.05584	0.996474
ENSG00000069974	RAB27A	0.0371219	6.91672	0.996474
ENSG00000069998	CECR5	-0.0178983	4.24932	0.996474
ENSG00000070010	UFD1L	0.0227866	5.47926	0.996474
ENSG00000070047	PHRF1	-0.0347181	5.37117	0.996474
ENSG00000070061	IKBKAP	-0.00652333	6.19188	0.996474
ENSG00000070081	NUCB2	0.0291354	4.76821	0.996474
ENSG00000070087	PFN2	-0.0496599	1.48772	0.996474
ENSG00000070159	PTPN3	0.182733	-2.16496	0.996474
ENSG00000070182	SPTB	0.0630232	6.48583	0.996474
ENSG00000070190	DAPP1	0.0165488	7.4773	0.996474
ENSG00000070214	SLC44A1	0.0126576	5.88679	0.996474
ENSG00000070366	SMG6	-0.00860431	5.19723	0.996474
ENSG00000070367	EXOC5	0.0131914	6.2922	0.996474
ENSG00000070371	CLTCL1	0.0112824	3.50292	0.996474
ENSG00000070404	FSTL3	0.0168015	0.760557	0.996474
ENSG00000070413	DGCR2	-0.0432428	6.66113	0.996474
ENSG00000070423	RNF126	-0.0161853	3.69202	0.996474
ENSG00000070444	MNT	-0.00534941	4.24552	0.996474
ENSG00000070476	ZXDC	-0.0189257	6.63683	0.996474
ENSG00000070495	JMJD6	0.00889651	5.08508	0.996474
ENSG00000070501	POLB	0.0298683	4.91576	0.996474
ENSG00000070526	ST6GALNAC1	0.0818168	0.96632	0.996474
ENSG00000070610	GBA2	-0.00648081	5.85691	0.996474
ENSG00000070614	NDST1	-0.0754016	5.76866	0.996474
ENSG00000070669	ASNS	-0.00679673	4.18417	0.996474
ENSG00000070718	AP3M2	0.00826743	5.22036	0.996474
ENSG00000070731	ST6GALNAC2	-0.00950944	4.71418	0.996474
ENSG00000070756	PABPC1	-0.00513185	8.49631	0.996474
ENSG00000070761	CFAP20	-0.0295925	3.81975	0.996474
ENSG00000070770	CSNK2A2	0.0158341	5.29168	0.996474
ENSG00000070785	EIF2B3	0.0332848	3.55423	0.996474
ENSG00000070814	TCOF1	-0.00549857	4.72414	0.996474
ENSG00000070882	OSBPL3	0.0141075	5.73073	0.996474
ENSG00000070915	SLC12A3	0.0296435	-0.8361	0.996474
ENSG00000070950	RAD18	0.0154815	4.04257	0.996474
ENSG00000070961	ATP2B1	0.0152388	8.07777	0.996474
ENSG00000071051	NCK2	-0.0158357	6.06358	0.996474
ENSG00000071054	MAP4K4	-0.0213867	8.05441	0.996474
ENSG00000071073	MGAT4A	0.00403689	7.8852	0.996474
ENSG00000071082	RPL31	0.048932	6.20002	0.996474
ENSG00000071127	WDR1	-0.020271	8.493	0.996474
ENSG00000071189	SNX13	0.0150768	7.44343	0.996474
ENSG00000071205	ARHGAP10	0.00858283	3.88808	0.996474
ENSG00000071242	RPS6KA2	0.017352	2.99022	0.996474
ENSG00000071243	ING3	-0.00349718	4.86651	0.996474
ENSG00000071246	VASH1	-0.017489	3.67391	0.996474
ENSG00000071282	LMCD1	0.0779421	-1.35774	0.996474
ENSG00000071462	WBSCR22	-0.0234634	3.95346	0.996474
ENSG00000071539	TRIP13	0.0536473	-0.456305	0.996474
ENSG00000071553	ATP6AP1	-0.0293808	5.79706	0.996474
ENSG00000071575	TRIB2	-0.0293528	6.08999	0.996474
ENSG00000071655	MBD3	-0.0221764	3.85794	0.996474
ENSG00000071794	HLTF	-0.00747955	4.71356	0.996474
ENSG00000071859	FAM50A	-0.00386296	4.36782	0.996474
ENSG00000071889	FAM3A	0.00710073	3.21436	0.996474
ENSG00000071994	PDCD2	0.0095808	6.07262	0.996474
ENSG00000072042	RDH11	-0.0111678	5.56699	0.996474
ENSG00000072062	PRKACA	-0.00852109	4.22146	0.996474
ENSG00000072071	LPHN1	-0.0720112	1.86188	0.996474
ENSG00000072110	ACTN1	-0.0513844	7.67598	0.996474
ENSG00000072121	ZFYVE26	-0.0201787	6.22287	0.996474
ENSG00000072133	RPS6KA6	0.0369356	-1.6813	0.996474
ENSG00000072134	EPN2	0.0440968	3.18971	0.996474
ENSG00000072163	LIMS2	-0.0870522	-0.0655397	0.996474
ENSG00000072195	SPEG	0.0907687	0.0523991	0.996474
ENSG00000072210	ALDH3A2	0.00712414	5.40297	0.996474
ENSG00000072310	SREBF1	-0.0238267	3.60987	0.996474
ENSG00000072364	AFF4	-0.0101025	7.28138	0.996474
ENSG00000072401	UBE2D1	-0.0366776	6.20337	0.996474
ENSG00000072415	MPP5	0.00880222	3.67731	0.996474
ENSG00000072422	RHOBTB1	-0.0178553	2.92488	0.996474
ENSG00000072501	SMC1A	-0.0257967	6.72113	0.996474
ENSG00000072506	HSD17B10	-0.00633376	4.18623	0.996474
ENSG00000072518	MARK2	-0.022971	5.08716	0.996474
ENSG00000072571	HMMR	0.10333	-0.23416	0.996474
ENSG00000072682	P4HA2	0.0218326	0.951	0.996474
ENSG00000072694	FCGR2B	-0.0238462	4.71302	0.996474
ENSG00000072736	NFATC3	-0.00337329	7.72393	0.996474
ENSG00000072756	TRNT1	0.0218231	5.13286	0.996474
ENSG00000072778	ACADVL	-0.0148209	6.65494	0.996474
ENSG00000072786	STK10	-0.00543734	8.00797	0.996474
ENSG00000072803	FBXW11	-0.00641946	6.29879	0.996474
ENSG00000072818	ACAP1	-0.0201219	7.0428	0.996474
ENSG00000072840	EVC	0.0503393	0.514224	0.996474
ENSG00000072849	DERL2	0.00630262	5.31604	0.996474
ENSG00000072858	SIDT1	-0.0191799	5.85464	0.996474
ENSG00000072864	NDE1	-0.00813758	6.34962	0.996474
ENSG00000072952	MRVI1	-0.0171903	6.16054	0.996474
ENSG00000072954	TMEM38A	0.012271	1.74526	0.996474
ENSG00000072958	AP1M1	-0.0105766	5.8292	0.996474
ENSG00000073008	PVR	0.0371841	3.52482	0.996474
ENSG00000073050	XRCC1	0.00687188	3.3383	0.996474
ENSG00000073060	SCARB1	0.0158953	2.25799	0.996474
ENSG00000073111	MCM2	0.0151666	3.16046	0.996474
ENSG00000073150	PANX2	-0.0219938	1.55353	0.996474
ENSG00000073169	SELO	-0.0163224	4.01175	0.996474
ENSG00000073331	ALPK1	0.0342499	7.75682	0.996474
ENSG00000073417	PDE8A	0.0143171	5.11471	0.996474
ENSG00000073464	CLCN4	-0.0203937	3.98364	0.996474
ENSG00000073536	NLE1	0.00453197	3.46799	0.996474
ENSG00000073578	SDHA	-0.00810022	6.37835	0.996474
ENSG00000073584	SMARCE1	0.014192	5.68738	0.996474
ENSG00000073614	KDM5A	-0.0082088	8.87648	0.996474
ENSG00000073670	ADAM11	0.0185254	-2.22818	0.996474
ENSG00000073712	FERMT2	-0.0189364	-2.15476	0.996474
ENSG00000073737	DHRS9	0.0294775	5.25726	0.996474
ENSG00000073756	PTGS2	-0.0318053	5.37928	0.996474
ENSG00000073792	IGF2BP2	0.0417371	5.3091	0.996474
ENSG00000073803	MAP3K13	-0.0179787	2.6551	0.996474
ENSG00000073849	ST6GAL1	-0.0141227	7.41389	0.996474
ENSG00000073861	TBX21	-0.0244557	4.86146	0.996474
ENSG00000073905	VDAC1P1	0.0246881	-1.87373	0.996474
ENSG00000073921	PICALM	0.010653	9.57251	0.996474
ENSG00000073969	NSF	0.00463857	5.42897	0.996474
ENSG00000074054	CLASP1	-0.00661619	6.96165	0.996474
ENSG00000074071	MRPS34	-0.0109109	3.76368	0.996474
ENSG00000074201	CLNS1A	0.00683418	5.61448	0.996474
ENSG00000074219	TEAD2	-0.0474367	-2.41199	0.996474
ENSG00000074266	EED	0.02443	4.97708	0.996474
ENSG00000074276	CDHR2	0.0629977	1.28507	0.996474
ENSG00000074356	C17orf85	0.0193521	6.01474	0.996474
ENSG00000074370	ATP2A3	-0.0145504	6.33178	0.996474
ENSG00000074416	MGLL	0.0286915	3.06119	0.996474
ENSG00000074527	NTN4	-0.14574	-0.23835	0.996474
ENSG00000074582	BCS1L	0.0249032	3.32527	0.996474
ENSG00000074590	NUAK1	-0.0731128	0.212636	0.996474
ENSG00000074603	DPP8	0.0137474	7.08898	0.996474
ENSG00000074657	ZNF532	0.0417255	3.71423	0.996474
ENSG00000074660	SCARF1	-0.0708156	4.63572	0.996474
ENSG00000074696	PTPLAD1	0.00900665	4.72898	0.996474
ENSG00000074706	IPCEF1	-0.0203443	6.4221	0.996474
ENSG00000074755	ZZEF1	-0.00774033	7.71815	0.996474
ENSG00000074800	ENO1	-0.0174019	8.65172	0.996474
ENSG00000074842	MYDGF	-0.0205733	3.93078	0.996474
ENSG00000074855	ANO8	-0.00919023	2.14896	0.996474
ENSG00000074964	ARHGEF10L	-0.0334388	4.26397	0.996474
ENSG00000074966	TXK	-0.052	6.36504	0.996474
ENSG00000075035	WSCD2	0.0407885	-2.33465	0.996474
ENSG00000075089	ACTR6	0.0260775	3.38856	0.996474
ENSG00000075142	SRI	0.00682293	5.49485	0.996474
ENSG00000075151	EIF4G3	-0.0111693	6.37858	0.996474
ENSG00000075188	NUP37	0.0350325	3.42206	0.996474
ENSG00000075213	SEMA3A	-0.0487145	-0.356139	0.996474
ENSG00000075218	GTSE1	0.0519622	-0.333813	0.996474
ENSG00000075223	SEMA3C	0.0655065	4.04594	0.996474
ENSG00000075234	TTC38	-0.0427845	4.96858	0.996474
ENSG00000075239	ACAT1	0.0394957	3.47185	0.996474
ENSG00000075240	GRAMD4	-0.0280601	4.93169	0.996474
ENSG00000075275	CELSR1	-0.0451842	1.72632	0.996474
ENSG00000075292	ZNF638	0.00832635	8.3496	0.996474
ENSG00000075303	SLC25A40	0.0288217	5.1463	0.996474
ENSG00000075336	TIMM21	-0.00740958	3.33677	0.996474
ENSG00000075340	ADD2	0.0143285	3.43695	0.996474
ENSG00000075413	MARK3	0.0216461	7.57328	0.996474
ENSG00000075415	SLC25A3	-0.00773156	7.32549	0.996474
ENSG00000075420	FNDC3B	-0.00939969	7.7711	0.996474
ENSG00000075426	FOSL2	-0.0459349	7.01844	0.996474
ENSG00000075539	FRYL	0.0176677	8.31153	0.996474
ENSG00000075568	TMEM131	0.0221769	6.47247	0.996474
ENSG00000075624	ACTB	-0.0299761	11.0646	0.996474
ENSG00000075643	MOCOS	-0.0427147	-2.28569	0.996474
ENSG00000075711	DLG1	0.0142961	6.23013	0.996474
ENSG00000075785	RAB7A	-0.0258548	5.88653	0.996474
ENSG00000075790	BCAP29	0.0384266	4.36513	0.996474
ENSG00000075826	SEC31B	0.0230037	3.38464	0.996474
ENSG00000075856	SART3	-0.00488887	6.36081	0.996474
ENSG00000075884	ARHGAP15	0.0129022	8.49155	0.996474
ENSG00000075914	EXOSC7	-0.0236375	4.11755	0.996474
ENSG00000075945	KIFAP3	0.00932169	5.24577	0.996474
ENSG00000075975	MKRN2	-0.00669469	4.96652	0.996474
ENSG00000076003	MCM6	-0.0127654	4.6025	0.996474
ENSG00000076043	REXO2	0.0222785	4.47459	0.996474
ENSG00000076053	RBM7	0.0112713	4.5896	0.996474
ENSG00000076067	RBMS2	-0.0145085	2.77225	0.996474
ENSG00000076108	BAZ2A	0.00738391	6.41237	0.996474
ENSG00000076201	PTPN23	-0.0138048	3.09215	0.996474
ENSG00000076248	UNG	-0.0159752	3.4039	0.996474
ENSG00000076258	FMO4	0.0339372	2.27315	0.996474
ENSG00000076321	KLHL20	0.0105404	5.04019	0.996474
ENSG00000076351	SLC46A1	0.0224738	2.47215	0.996474
ENSG00000076356	PLXNA2	-0.0239083	3.50672	0.996474
ENSG00000076382	SPAG5	0.0130178	2.18736	0.996474
ENSG00000076513	ANKRD13A	0.0107403	8.41245	0.996474
ENSG00000076554	TPD52	0.0154837	4.20099	0.996474
ENSG00000076641	PAG1	0.00944389	8.34713	0.996474
ENSG00000076662	ICAM3	-0.0396393	8.6795	0.996474
ENSG00000076685	NT5C2	0.00638024	7.80251	0.996474
ENSG00000076706	MCAM	0.149713	-2.19893	0.996474
ENSG00000076716	GPC4	-0.121655	-1.84319	0.996474
ENSG00000076770	MBNL3	0.037478	8.68422	0.996474
ENSG00000076864	RAP1GAP	0.276579	1.8501	0.996474
ENSG00000076928	ARHGEF1	-0.0384253	7.07765	0.996474
ENSG00000076944	STXBP2	-0.0122379	4.70489	0.996474
ENSG00000077044	DGKD	-0.0167657	6.73661	0.996474
ENSG00000077063	CTTNBP2	0.0978915	-0.78242	0.996474
ENSG00000077097	TOP2B	0.0201129	7.83124	0.996474
ENSG00000077147	TM9SF3	0.0273145	7.17315	0.996474
ENSG00000077150	NFKB2	-0.0226208	5.75571	0.996474
ENSG00000077152	UBE2T	-0.0685059	0.182233	0.996474
ENSG00000077157	PPP1R12B	-0.0276451	7.39052	0.996474
ENSG00000077232	DNAJC10	0.0290064	6.75467	0.996474
ENSG00000077235	GTF3C1	-0.0219203	6.0064	0.996474
ENSG00000077238	IL4R	-0.0291124	7.74763	0.996474
ENSG00000077254	USP33	0.0199499	7.07123	0.996474
ENSG00000077264	PAK3	-0.177438	-0.45012	0.996474
ENSG00000077312	SNRPA	0.0335601	3.46945	0.996474
ENSG00000077327	SPAG6	0.116734	-1.36743	0.996474
ENSG00000077348	EXOSC5	-0.0245173	2.13403	0.996474
ENSG00000077380	DYNC1I2	0.0200561	5.34656	0.996474
ENSG00000077454	LRCH4	-0.0307784	5.15125	0.996474
ENSG00000077458	FAM76B	0.018242	5.46804	0.996474
ENSG00000077463	SIRT6	-0.034629	2.3794	0.996474
ENSG00000077514	POLD3	0.00881061	5.03575	0.996474
ENSG00000077549	CAPZB	-0.00479377	6.21691	0.996474
ENSG00000077585	GPR137B	0.0319595	3.2269	0.996474
ENSG00000077616	NAALAD2	0.0443692	-2.30956	0.996474
ENSG00000077684	JADE1	-0.00302677	6.76414	0.996474
ENSG00000077713	SLC25A43	0.011552	3.03336	0.996474
ENSG00000077721	UBE2A	0.0031841	5.01712	0.996474
ENSG00000077782	FGFR1	0.0614895	1.87279	0.996474
ENSG00000077984	CST7	-0.0194956	5.28062	0.996474
ENSG00000078018	MAP2	-0.0412569	-0.307264	0.996474
ENSG00000078053	AMPH	-0.0807143	-2.31344	0.996474
ENSG00000078061	ARAF	-0.00468893	4.27248	0.996474
ENSG00000078070	MCCC1	0.00263018	4.64464	0.996474
ENSG00000078081	LAMP3	-0.144705	0.635799	0.996474
ENSG00000078114	NEBL	0.236031	1.03217	0.996474
ENSG00000078124	ACER3	0.0218996	5.25417	0.996474
ENSG00000078140	UBE2K	0.0183971	5.75322	0.996474
ENSG00000078142	PIK3C3	0.0180026	7.10691	0.996474
ENSG00000078177	N4BP2	0.017303	6.04858	0.996474
ENSG00000078237	C12orf5	0.0368379	3.75705	0.996474
ENSG00000078246	TULP3	-0.0209642	2.13127	0.996474
ENSG00000078269	SYNJ2	-0.0460426	4.32616	0.996474
ENSG00000078304	PPP2R5C	0.0117095	8.35279	0.996474
ENSG00000078369	GNB1	-0.01576	7.88683	0.996474
ENSG00000078399	HOXA9	0.117002	-2.21208	0.996474
ENSG00000078401	EDN1	-0.0282659	-0.701388	0.996474
ENSG00000078403	MLLT10	0.00903005	5.83334	0.996474
ENSG00000078487	ZCWPW1	-0.0443085	2.59596	0.996474
ENSG00000078589	P2RY10	0.00716943	5.67705	0.996474
ENSG00000078596	ITM2A	0.0478271	5.08344	0.996474
ENSG00000078668	VDAC3	0.012829	5.86351	0.996474
ENSG00000078674	PCM1	0.0261777	8.24613	0.996474
ENSG00000078687	TNRC6C	-0.0112426	5.87728	0.996474
ENSG00000078699	CBFA2T2	0.0180223	4.70213	0.996474
ENSG00000078747	ITCH	0.0122064	7.84727	0.996474
ENSG00000078804	TP53INP2	-0.0366751	2.0256	0.996474
ENSG00000078808	SDF4	-0.0347544	5.08745	0.996474
ENSG00000078814	MYH7B	-0.0573431	-2.26243	0.996474
ENSG00000078902	TOLLIP	-0.0108552	5.04647	0.996474
ENSG00000079102	RUNX1T1	-0.0291993	-2.38739	0.996474
ENSG00000079134	THOC1	0.00683519	5.39871	0.996474
ENSG00000079150	FKBP7	-0.0206825	-0.866532	0.996474
ENSG00000079156	OSBPL6	-0.186485	-0.0932839	0.996474
ENSG00000079215	SLC1A3	0.0233145	0.363758	0.996474
ENSG00000079257	LXN	0.0384839	2.88222	0.996474
ENSG00000079277	MKNK1	-0.0216981	6.61487	0.996474
ENSG00000079308	TNS1	0.0168146	7.66388	0.996474
ENSG00000079332	SAR1A	-0.00475199	6.90736	0.996474
ENSG00000079335	CDC14A	0.0155462	6.32427	0.996474
ENSG00000079337	RAPGEF3	-0.0467497	-1.22563	0.996474
ENSG00000079385	CEACAM1	0.0224403	4.31872	0.996474
ENSG00000079387	SENP1	-0.00865792	5.44424	0.996474
ENSG00000079393	DUSP13	0.0492766	-1.57148	0.996474
ENSG00000079432	CIC	-0.0110766	4.01936	0.996474
ENSG00000079435	LIPE	-0.0436431	1.21568	0.996474
ENSG00000079459	FDFT1	-0.00958179	6.53728	0.996474
ENSG00000079462	PAFAH1B3	-0.0705573	1.66689	0.996474
ENSG00000079482	OPHN1	0.0344441	1.92743	0.996474
ENSG00000079739	PGM1	-0.0194192	5.00782	0.996474
ENSG00000079785	DDX1	0.0189858	5.36785	0.996474
ENSG00000079805	DNM2	-0.0130358	7.40173	0.996474
ENSG00000079819	EPB41L2	-0.0317491	3.9896	0.996474
ENSG00000079931	MOXD1	0.0221658	-0.601142	0.996474
ENSG00000079950	STX7	0.0193486	8.38331	0.996474
ENSG00000079999	KEAP1	0.0068502	4.51152	0.996474
ENSG00000080007	DDX43	-0.0431784	-0.0619575	0.996474
ENSG00000080031	PTPRH	0.0175972	-2.32489	0.996474
ENSG00000080189	SLC35C2	-0.0099898	5.65369	0.996474
ENSG00000080200	CRYBG3	0.0134893	5.90795	0.996474
ENSG00000080298	RFX3	0.0159586	5.75918	0.996474
ENSG00000080345	RIF1	0.00911186	7.45072	0.996474
ENSG00000080371	RAB21	0.0120457	6.65385	0.996474
ENSG00000080503	SMARCA2	-0.011689	7.62214	0.996474
ENSG00000080546	SESN1	-0.011197	5.40106	0.996474
ENSG00000080561	MID2	-0.0141802	2.65363	0.996474
ENSG00000080573	COL5A3	-0.124572	0.3268	0.996474
ENSG00000080603	SRCAP	0.0138646	2.72895	0.996474
ENSG00000080608	KIAA0020	0.00823679	4.72139	0.996474
ENSG00000080802	CNOT4	-0.00848377	5.39067	0.996474
ENSG00000080815	PSEN1	-0.00935759	7.74443	0.996474
ENSG00000080819	CPOX	0.0178323	4.59373	0.996474
ENSG00000080823	MOK	0.107428	0.545289	0.996474
ENSG00000080824	HSP90AA1	0.0170942	7.31071	0.996474
ENSG00000080839	RBL1	0.0300772	5.14765	0.996474
ENSG00000080845	DLGAP4	0.0526107	2.90173	0.996474
ENSG00000080854	IGSF9B	0.0640528	1.94412	0.996474
ENSG00000080947	CROCCP3	0.0110854	3.82589	0.996474
ENSG00000080986	NDC80	0.0543664	2.31286	0.996474
ENSG00000081014	AP4E1	0.0206955	5.24136	0.996474
ENSG00000081019	RSBN1	-0.0140404	6.44	0.996474
ENSG00000081026	MAGI3	-0.0203844	2.63212	0.996474
ENSG00000081052	COL4A4	0.0570165	1.67602	0.996474
ENSG00000081059	TCF7	-0.0435597	6.63472	0.996474
ENSG00000081148	IMPG2	0.0313044	2.52879	0.996474
ENSG00000081154	PCNP	0.0302769	5.97406	0.996474
ENSG00000081181	ARG2	0.0566723	0.667108	0.996474
ENSG00000081237	PTPRC	-0.0108362	11.5881	0.996474
ENSG00000081307	UBA5	0.0266634	4.88256	0.996474
ENSG00000081320	STK17B	0.0177154	9.40573	0.996474
ENSG00000081692	JMJD4	-0.0248629	4.50099	0.996474
ENSG00000081721	DUSP12	-0.0161726	3.4682	0.996474
ENSG00000081760	AACS	-0.00620761	3.27752	0.996474
ENSG00000081791	KIAA0141	-0.0035495	5.54486	0.996474
ENSG00000081870	HSPB11	0.0236909	3.81362	0.996474
ENSG00000081913	PHLPP1	0.0133473	4.22567	0.996474
ENSG00000081985	IL12RB2	-0.107195	2.43467	0.996474
ENSG00000082014	SMARCD3	-0.00760437	3.79758	0.996474
ENSG00000082068	WDR70	0.00949128	5.36935	0.996474
ENSG00000082146	STRADB	0.0144228	9.27776	0.996474
ENSG00000082153	BZW1	0.0163599	6.85751	0.996474
ENSG00000082196	C1QTNF3	-0.0185343	1.63994	0.996474
ENSG00000082213	C5orf22	0.0281947	4.81865	0.996474
ENSG00000082258	CCNT2	0.011231	7.18854	0.996474
ENSG00000082269	FAM135A	0.0192715	4.70965	0.996474
ENSG00000082397	EPB41L3	0.0214013	5.33426	0.996474
ENSG00000082458	DLG3	0.0578504	3.24139	0.996474
ENSG00000082512	TRAF5	0.020084	6.43529	0.996474
ENSG00000082515	MRPL22	-0.00659143	3.05685	0.996474
ENSG00000082516	GEMIN5	-0.0237435	4.8774	0.996474
ENSG00000082641	NFE2L1	-0.00458582	5.98327	0.996474
ENSG00000082701	GSK3B	-0.011728	6.65472	0.996474
ENSG00000082781	ITGB5	-0.0341705	3.79782	0.996474
ENSG00000082805	ERC1	-0.024044	5.90965	0.996474
ENSG00000082898	XPO1	0.0320609	7.64769	0.996474
ENSG00000082996	RNF13	0.00885191	7.51918	0.996474
ENSG00000083093	PALB2	0.00586792	3.93792	0.996474
ENSG00000083097	DOPEY1	0.0114405	6.7212	0.996474
ENSG00000083099	LYRM2	0.0180482	4.61015	0.996474
ENSG00000083123	BCKDHB	-0.0184521	3.66678	0.996474
ENSG00000083168	KAT6A	-0.00837826	8.44822	0.996474
ENSG00000083223	ZCCHC6	0.00904904	8.93082	0.996474
ENSG00000083444	PLOD1	-0.0415148	5.19314	0.996474
ENSG00000083457	ITGAE	0.0353814	3.26054	0.996474
ENSG00000083520	DIS3	0.0219981	6.47401	0.996474
ENSG00000083535	PIBF1	0.0220741	5.13107	0.996474
ENSG00000083544	TDRD3	0.00654961	4.61118	0.996474
ENSG00000083635	NUFIP1	0.00951845	1.66819	0.996474
ENSG00000083642	PDS5B	0.0235447	6.70844	0.996474
ENSG00000083720	OXCT1	0.00657836	5.1304	0.996474
ENSG00000083750	RRAGB	0.0203309	3.97968	0.996474
ENSG00000083799	CYLD	0.0134321	8.91419	0.996474
ENSG00000083807	SLC27A5	-0.0271469	1.74648	0.996474
ENSG00000083812	ZNF324	-0.00983634	4.21145	0.996474
ENSG00000083814	ZNF671	0.00466548	4.91547	0.996474
ENSG00000083817	ZNF416	0.00637058	3.42361	0.996474
ENSG00000083828	ZNF586	0.0128072	6.02087	0.996474
ENSG00000083838	ZNF446	-0.012882	2.3435	0.996474
ENSG00000083857	FAT1	0.227547	1.23591	0.996474
ENSG00000083937	CHMP2B	0.013152	4.64694	0.996474
ENSG00000084073	ZMPSTE24	0.00578847	5.54776	0.996474
ENSG00000084090	STARD7	-0.00598594	6.92168	0.996474
ENSG00000084092	NOA1	-0.0207486	4.72826	0.996474
ENSG00000084093	REST	-0.00261534	6.74749	0.996474
ENSG00000084110	HAL	-0.0132543	6.77029	0.996474
ENSG00000084112	SSH1	-0.0207181	5.61077	0.996474
ENSG00000084207	GSTP1	-0.0387995	6.04226	0.996474
ENSG00000084234	APLP2	-0.023537	8.04891	0.996474
ENSG00000084444	KIAA1467	-0.0448998	2.73399	0.996474
ENSG00000084623	EIF3I	-0.00472797	5.87267	0.996474
ENSG00000084652	TXLNA	-0.0200385	5.63789	0.996474
ENSG00000084676	NCOA1	-0.00370304	8.31616	0.996474
ENSG00000084693	AGBL5	-0.00953812	2.68925	0.996474
ENSG00000084731	KIF3C	-0.0779625	2.95381	0.996474
ENSG00000084733	RAB10	-0.00499493	7.22859	0.996474
ENSG00000084754	HADHA	-0.0140927	7.33549	0.996474
ENSG00000084764	MAPRE3	-0.0111437	0.995844	0.996474
ENSG00000084774	CAD	-0.0155098	4.09135	0.996474
ENSG00000085063	CD59	0.0168581	5.86859	0.996474
ENSG00000085117	CD82	-0.028809	5.96722	0.996474
ENSG00000085185	BCORL1	-0.00905491	2.67306	0.996474
ENSG00000085224	ATRX	0.0107585	7.92511	0.996474
ENSG00000085231	TAF9	0.0601271	1.24057	0.996474
ENSG00000085265	FCN1	-0.0210919	9.51598	0.996474
ENSG00000085274	MYNN	0.0281722	5.17589	0.996474
ENSG00000085276	MECOM	0.139454	-1.32377	0.996474
ENSG00000085365	SCAMP1	0.0278534	5.25805	0.996474
ENSG00000085382	HACE1	0.0206475	4.33852	0.996474
ENSG00000085433	WDR47	0.00939088	4.79298	0.996474
ENSG00000085449	WDFY1	0.0172766	6.59667	0.996474
ENSG00000085465	OVGP1	-0.0240968	1.60499	0.996474
ENSG00000085514	PILRA	-0.0453155	5.08085	0.996474
ENSG00000085644	ZNF213	-0.0479619	2.82999	0.996474
ENSG00000085662	AKR1B1	-0.0117254	4.86731	0.996474
ENSG00000085719	CPNE3	0.0135491	6.82659	0.996474
ENSG00000085721	RRN3	-0.00995698	5.3845	0.996474
ENSG00000085733	CTTN	-0.0439461	4.17148	0.996474
ENSG00000085741	WNT11	-0.0220614	-1.80984	0.996474
ENSG00000085760	MTIF2	0.0231867	4.6353	0.996474
ENSG00000085788	DDHD2	0.0148533	5.80557	0.996474
ENSG00000085831	TTC39A	-0.0170343	0.266873	0.996474
ENSG00000085832	EPS15	0.0233309	7.66707	0.996474
ENSG00000085840	ORC1	0.0580132	0.695392	0.996474
ENSG00000085871	MGST2	0.0154745	2.81605	0.996474
ENSG00000085978	ATG16L1	-0.00255262	6.00654	0.996474
ENSG00000085982	USP40	0.00727731	4.19953	0.996474
ENSG00000085998	POMGNT1	-0.00864194	4.17812	0.996474
ENSG00000085999	RAD54L	-0.0157245	-1.36165	0.996474
ENSG00000086015	MAST2	-0.0104516	3.22064	0.996474
ENSG00000086061	DNAJA1	0.0231822	6.57092	0.996474
ENSG00000086062	B4GALT1	-0.012597	5.85267	0.996474
ENSG00000086065	CHMP5	0.0317049	4.64298	0.996474
ENSG00000086189	DIMT1	-0.0061943	4.03886	0.996474
ENSG00000086200	IPO11	0.00361881	4.66022	0.996474
ENSG00000086232	EIF2AK1	0.0289639	7.4939	0.996474
ENSG00000086288	NME8	0.0455486	3.0499	0.996474
ENSG00000086289	EPDR1	0.0715208	0.0399274	0.996474
ENSG00000086300	SNX10	0.00806849	6.86107	0.996474
ENSG00000086475	SEPHS1	-0.016158	4.45126	0.996474
ENSG00000086504	MRPL28	-0.0223561	4.09147	0.996474
ENSG00000086506	HBQ1	0.117247	1.97321	0.996474
ENSG00000086544	ITPKC	-0.0238515	3.562	0.996474
ENSG00000086548	CEACAM6	0.256219	0.595676	0.996474
ENSG00000086589	RBM22	0.00782154	5.50892	0.996474
ENSG00000086598	TMED2	0.0175963	6.87429	0.996474
ENSG00000086619	ERO1LB	0.0117766	4.71932	0.996474
ENSG00000086666	ZFAND6	0.0123499	6.44547	0.996474
ENSG00000086730	LAT2	-0.0299238	7.18763	0.996474
ENSG00000086827	ZW10	-0.00716344	4.32869	0.996474
ENSG00000086848	ALG9	-0.0310399	2.65211	0.996474
ENSG00000087008	ACOX3	-0.0296697	3.93206	0.996474
ENSG00000087053	MTMR2	0.0249334	4.27569	0.996474
ENSG00000087074	PPP1R15A	-0.00449965	5.89639	0.996474
ENSG00000087085	ACHE	0.182661	-0.590996	0.996474
ENSG00000087086	FTL	-0.0301686	11.1312	0.996474
ENSG00000087087	SRRT	-0.0150496	3.8724	0.996474
ENSG00000087088	BAX	-0.0230205	4.21985	0.996474
ENSG00000087095	NLK	0.0151625	5.21407	0.996474
ENSG00000087116	ADAMTS2	-0.0992178	-2.62057	0.996474
ENSG00000087152	ATXN7L3	-0.0180572	6.15253	0.996474
ENSG00000087157	PGS1	-0.0155502	6.99516	0.996474
ENSG00000087206	UIMC1	-0.00513341	6.50202	0.996474
ENSG00000087237	CETP	0.115954	-1.13181	0.996474
ENSG00000087253	LPCAT2	0.0120295	7.22833	0.996474
ENSG00000087266	SH3BP2	-0.0111103	7.03525	0.996474
ENSG00000087269	NOP14	-0.0152393	5.03973	0.996474
ENSG00000087274	ADD1	0.0107271	7.53274	0.996474
ENSG00000087299	L2HGDH	-0.0243566	2.23621	0.996474
ENSG00000087301	TXNDC16	0.0342492	4.77499	0.996474
ENSG00000087302	C14orf166	0.00626144	5.58112	0.996474
ENSG00000087303	NID2	-0.0923817	-1.71703	0.996474
ENSG00000087365	SF3B2	-0.0282919	6.32415	0.996474
ENSG00000087448	KLHL42	-0.00741891	4.83709	0.996474
ENSG00000087460	GNAS	0.0114098	8.81535	0.996474
ENSG00000087470	DNM1L	0.0143822	5.9178	0.996474
ENSG00000087502	ERGIC2	0.0282814	5.76	0.996474
ENSG00000087586	AURKA	0.0481954	2.24776	0.996474
ENSG00000087589	CASS4	-0.0493017	6.02047	0.996474
ENSG00000087903	RFX2	0.0524111	3.83194	0.996474
ENSG00000088035	ALG6	0.0331747	4.85733	0.996474
ENSG00000088038	CNOT3	-0.0148478	3.19018	0.996474
ENSG00000088053	GP6	-0.0809915	1.14065	0.996474
ENSG00000088179	PTPN4	0.0181421	7.74483	0.996474
ENSG00000088205	DDX18	0.00280815	6.53409	0.996474
ENSG00000088247	KHSRP	-0.00899742	4.20916	0.996474
ENSG00000088256	GNA11	0.0195599	0.726486	0.996474
ENSG00000088280	ASAP3	0.130423	0.063801	0.996474
ENSG00000088298	EDEM2	-0.0150931	5.63022	0.996474
ENSG00000088340	FER1L4	-0.0574988	-2.45062	0.996474
ENSG00000088356	PDRG1	0.00865531	3.00039	0.996474
ENSG00000088387	DOCK9	-0.00389261	6.58603	0.996474
ENSG00000088448	ANKRD10	0.00526437	7.33593	0.996474
ENSG00000088543	C3orf18	0.019385	3.26989	0.996474
ENSG00000088682	COQ9	0.00959396	4.45412	0.996474
ENSG00000088726	TMEM40	-0.049834	1.71371	0.996474
ENSG00000088727	KIF9	0.0111524	1.11199	0.996474
ENSG00000088766	CRLS1	0.033841	4.43193	0.996474
ENSG00000088808	PPP1R13B	-0.02595	2.75597	0.996474
ENSG00000088812	ATRN	-0.0138015	5.48991	0.996474
ENSG00000088826	SMOX	0.0159887	3.85183	0.996474
ENSG00000088827	SIGLEC1	-0.216659	1.76519	0.996474
ENSG00000088833	NSFL1C	-0.017278	6.66719	0.996474
ENSG00000088854	C20orf194	0.0145158	4.55909	0.996474
ENSG00000088881	EBF4	-0.0421913	-0.80598	0.996474
ENSG00000088888	MAVS	-0.00480792	6.3304	0.996474
ENSG00000088899	LZTS3	-0.0934996	-0.8336	0.996474
ENSG00000088930	XRN2	-0.00318695	7.5554	0.996474
ENSG00000088970	KIZ	0.0287525	4.94315	0.996474
ENSG00000088986	DYNLL1	0.0139864	5.36227	0.996474
ENSG00000089009	RPL6	0.0384787	7.55579	0.996474
ENSG00000089012	SIRPG	-0.0167273	3.18245	0.996474
ENSG00000089022	MAPKAPK5	-0.0114276	5.6161	0.996474
ENSG00000089041	P2RX7	0.00562666	4.71315	0.996474
ENSG00000089048	ESF1	0.0266401	3.7315	0.996474
ENSG00000089050	RBBP9	-0.0336766	3.76218	0.996474
ENSG00000089053	ANAPC5	0.0048218	7.23496	0.996474
ENSG00000089057	SLC23A2	-0.0169279	5.82352	0.996474
ENSG00000089060	SLC8B1	-0.00752137	5.57116	0.996474
ENSG00000089063	TMEM230	0.0029379	5.96193	0.996474
ENSG00000089091	DZANK1	0.00665349	1.81331	0.996474
ENSG00000089094	KDM2B	0.00531336	5.04609	0.996474
ENSG00000089127	OAS1	-0.0488156	6.43988	0.996474
ENSG00000089154	GCN1L1	-0.0310155	6.52725	0.996474
ENSG00000089157	RPLP0	0.0248109	8.6766	0.996474
ENSG00000089159	PXN	-0.0188914	6.29225	0.996474
ENSG00000089163	SIRT4	-0.132315	-0.298304	0.996474
ENSG00000089169	RPH3A	0.0642398	-0.860602	0.996474
ENSG00000089177	KIF16B	-0.0368009	4.57309	0.996474
ENSG00000089195	TRMT6	0.0306769	3.96107	0.996474
ENSG00000089220	PEBP1	-0.0111839	5.53515	0.996474
ENSG00000089248	ERP29	-0.00902407	5.95476	0.996474
ENSG00000089280	FUS	0.0142156	7.18649	0.996474
ENSG00000089289	IGBP1	0.0055606	5.38478	0.996474
ENSG00000089327	FXYD5	-0.0069065	5.07321	0.996474
ENSG00000089335	ZNF302	0.00667992	5.09603	0.996474
ENSG00000089351	GRAMD1A	-0.0259257	5.57063	0.996474
ENSG00000089472	HEPH	0.0362425	-1.04735	0.996474
ENSG00000089486	CDIP1	-0.0414059	3.08566	0.996474
ENSG00000089505	CMTM1	-0.0110484	2.77677	0.996474
ENSG00000089597	GANAB	-0.0222096	6.5262	0.996474
ENSG00000089639	GMIP	-0.0130442	6.32092	0.996474
ENSG00000089685	BIRC5	0.125948	-0.181194	0.996474
ENSG00000089692	LAG3	0.0656078	-0.526931	0.996474
ENSG00000089693	MLF2	-0.0270447	5.4539	0.996474
ENSG00000089723	OTUB2	0.0499031	-0.70578	0.996474
ENSG00000089737	DDX24	-0.0183009	7.26318	0.996474
ENSG00000089775	ZBTB25	0.0109334	6.22788	0.996474
ENSG00000089818	NECAP1	-0.00771056	5.93567	0.996474
ENSG00000089820	ARHGAP4	-0.0207504	6.97821	0.996474
ENSG00000089847	ANKRD24	0.105145	-1.36851	0.996474
ENSG00000089876	DHX32	-0.00476949	3.90077	0.996474
ENSG00000090006	LTBP4	0.0609936	2.62209	0.996474
ENSG00000090013	BLVRB	0.0537171	7.44923	0.996474
ENSG00000090020	SLC9A1	-0.0225698	2.69049	0.996474
ENSG00000090060	PAPOLA	0.0049386	8.29968	0.996474
ENSG00000090097	PCBP4	0.0127283	2.14995	0.996474
ENSG00000090238	YPEL3	-0.0337072	6.34394	0.996474
ENSG00000090263	MRPS33	-0.0119402	3.15093	0.996474
ENSG00000090273	NUDC	-0.0335026	4.77485	0.996474
ENSG00000090316	MAEA	-0.0213581	6.01989	0.996474
ENSG00000090339	ICAM1	0.00666037	5.05775	0.996474
ENSG00000090372	STRN4	-0.00810529	4.65805	0.996474
ENSG00000090376	IRAK3	-0.00748004	7.77373	0.996474
ENSG00000090382	LYZ	0.0473778	11.5731	0.996474
ENSG00000090432	MUL1	-0.0371118	4.45097	0.996474
ENSG00000090447	TFAP4	0.0108235	2.63926	0.996474
ENSG00000090470	PDCD7	-0.00276592	4.25747	0.996474
ENSG00000090487	SPG21	-0.0167886	6.55286	0.996474
ENSG00000090520	DNAJB11	0.0071239	5.07607	0.996474
ENSG00000090554	FLT3LG	-0.0201982	0.609458	0.996474
ENSG00000090581	GNPTG	-0.0198194	4.84499	0.996474
ENSG00000090612	ZNF268	0.0166746	4.91573	0.996474
ENSG00000090659	CD209	-0.0435695	-2.12361	0.996474
ENSG00000090661	CERS4	-0.0268548	3.81615	0.996474
ENSG00000090686	USP48	0.0163251	6.87309	0.996474
ENSG00000090776	EFNB1	-0.0303832	1.95541	0.996474
ENSG00000090857	PDPR	0.0431054	5.02257	0.996474
ENSG00000090861	AARS	-0.0232326	5.03549	0.996474
ENSG00000090863	GLG1	-0.0150721	7.66291	0.996474
ENSG00000090889	KIF4A	0.106285	0.64511	0.996474
ENSG00000090971	NAT14	0.0274831	-0.837127	0.996474
ENSG00000090975	PITPNM2	-0.0243009	3.06047	0.996474
ENSG00000090989	EXOC1	0.0165478	6.60251	0.996474
ENSG00000091009	RBM27	0.0179986	4.85723	0.996474
ENSG00000091073	DTX2	0.0153028	2.75471	0.996474
ENSG00000091106	NLRC4	-0.0118239	6.06682	0.996474
ENSG00000091129	NRCAM	-0.0226363	0.319701	0.996474
ENSG00000091137	SLC26A4	0.0170852	-1.91634	0.996474
ENSG00000091140	DLD	0.0277303	5.80115	0.996474
ENSG00000091164	TXNL1	0.0187392	4.91212	0.996474
ENSG00000091181	IL5RA	0.0138027	4.69892	0.996474
ENSG00000091262	ABCC6	-0.0199955	1.17582	0.996474
ENSG00000091317	CMTM6	0.00564883	8.70687	0.996474
ENSG00000091409	ITGA6	-0.0317163	6.69537	0.996474
ENSG00000091428	RAPGEF4	-0.0487417	-1.17788	0.996474
ENSG00000091436	pk	0.0180288	5.0909	0.996474
ENSG00000091483	FH	-0.00631643	4.6929	0.996474
ENSG00000091490	SEL1L3	0.0110547	6.76701	0.996474
ENSG00000091513	TF	0.0416891	-1.42537	0.996474
ENSG00000091527	CDV3	0.0130815	8.0321	0.996474
ENSG00000091536	MYO15A	0.0616748	-1.05488	0.996474
ENSG00000091542	ALKBH5	-0.0209238	6.47099	0.996474
ENSG00000091592	NLRP1	-0.00525038	7.87515	0.996474
ENSG00000091622	PITPNM3	0.0171875	-0.990387	0.996474
ENSG00000091640	SPAG7	-0.013228	3.68291	0.996474
ENSG00000091651	ORC6	0.101121	0.139035	0.996474
ENSG00000091831	ESR1	-0.0763924	1.13794	0.996474
ENSG00000091844	RGS17	-0.0282109	-1.04755	0.996474
ENSG00000091947	TMEM101	-0.0200771	4.27829	0.996474
ENSG00000092010	PSME1	-0.0199433	7.8242	0.996474
ENSG00000092020	PPP2R3C	0.0476083	5.4914	0.996474
ENSG00000092036	HAUS4	-0.0175648	4.86522	0.996474
ENSG00000092051	JPH4	0.0803105	-2.31677	0.996474
ENSG00000092067	CEBPE	-0.0137149	1.91087	0.996474
ENSG00000092068	SLC7A8	-0.104039	-0.593676	0.996474
ENSG00000092094	OSGEP	0.0189468	5.15427	0.996474
ENSG00000092098	RNF31	-0.0383456	4.7347	0.996474
ENSG00000092108	SCFD1	0.0282437	6.16466	0.996474
ENSG00000092140	G2E3	0.00749708	5.23256	0.996474
ENSG00000092148	HECTD1	0.012374	7.94794	0.996474
ENSG00000092199	HNRNPC	0.0138115	8.82547	0.996474
ENSG00000092200	RPGRIP1	0.00736615	3.42489	0.996474
ENSG00000092203	TOX4	-0.0122999	6.65306	0.996474
ENSG00000092208	GEMIN2	-0.0200677	2.03922	0.996474
ENSG00000092295	TGM1	-0.0807231	0.104267	0.996474
ENSG00000092330	TINF2	-0.0229103	6.69591	0.996474
ENSG00000092421	SEMA6A	0.107043	-2.37569	0.996474
ENSG00000092439	TRPM7	0.0278534	7.17602	0.996474
ENSG00000092470	WDR76	0.0495471	3.68558	0.996474
ENSG00000092529	CAPN3	0.0673143	1.89221	0.996474
ENSG00000092531	SNAP23	0.00313537	7.51823	0.996474
ENSG00000092621	PHGDH	-0.0169805	0.689066	0.996474
ENSG00000092820	EZR	0.0129253	7.34048	0.996474
ENSG00000092841	MYL6	0.0470772	7.87442	0.996474
ENSG00000092847	AGO1	-0.0117145	6.36916	0.996474
ENSG00000092853	CLSPN	0.0618337	1.52178	0.996474
ENSG00000092871	RFFL	-0.00941613	6.16922	0.996474
ENSG00000092929	UNC13D	-0.0360258	6.53445	0.996474
ENSG00000092931	MFSD11	0.00973698	4.67433	0.996474
ENSG00000092964	DPYSL2	-0.00396093	6.63191	0.996474
ENSG00000092969	TGFB2	0.0388166	-1.64467	0.996474
ENSG00000092978	GPATCH2	0.00864996	4.80596	0.996474
ENSG00000093000	NUP50	-0.00466378	7.89718	0.996474
ENSG00000093010	COMT	-0.0252176	4.50858	0.996474
ENSG00000093072	CECR1	-0.0238639	6.91621	0.996474
ENSG00000093100	XXbac-B461K10.4	-0.06296	-1.52713	0.996474
ENSG00000093134	VNN3	0.0395878	6.75819	0.996474
ENSG00000093144	ECHDC1	0.0199195	5.54051	0.996474
ENSG00000093167	LRRFIP2	0.011506	6.306	0.996474
ENSG00000093183	SEC22C	0.020398	5.55645	0.996474
ENSG00000093217	XYLB	0.0171941	1.05981	0.996474
ENSG00000094631	HDAC6	0.0123721	5.40573	0.996474
ENSG00000094804	CDC6	0.113529	0.42941	0.996474
ENSG00000094880	CDC23	0.0193066	4.88751	0.996474
ENSG00000094914	AAAS	0.00796253	3.03303	0.996474
ENSG00000094916	CBX5	0.00603895	5.98793	0.996474
ENSG00000094975	SUCO	0.0289714	6.4569	0.996474
ENSG00000095002	MSH2	-0.00932858	4.64237	0.996474
ENSG00000095015	MAP3K1	0.0151006	9.01336	0.996474
ENSG00000095059	DHPS	-0.0212855	4.52371	0.996474
ENSG00000095066	HOOK2	-0.00774488	2.40845	0.996474
ENSG00000095139	ARCN1	-0.0167641	6.84564	0.996474
ENSG00000095209	TMEM38B	-0.021603	3.22772	0.996474
ENSG00000095261	PSMD5	-0.00759038	5.0027	0.996474
ENSG00000095303	PTGS1	-0.0371235	5.82106	0.996474
ENSG00000095319	NUP188	-0.011191	5.10053	0.996474
ENSG00000095321	CRAT	0.0727876	3.06963	0.996474
ENSG00000095370	SH2D3C	-0.0217172	6.15307	0.996474
ENSG00000095380	NANS	-0.00542609	4.22726	0.996474
ENSG00000095383	TBC1D2	-0.0323798	4.49472	0.996474
ENSG00000095397	DFNB31	0.030722	0.597947	0.996474
ENSG00000095485	CWF19L1	0.0136933	5.62886	0.996474
ENSG00000095564	BTAF1	0.0207201	7.8152	0.996474
ENSG00000095574	IKZF5	-0.0129858	4.90207	0.996474
ENSG00000095585	BLNK	0.0224355	3.24077	0.996474
ENSG00000095637	SORBS1	0.0507663	0.981413	0.996474
ENSG00000095739	BAMBI	-0.0786506	-0.796199	0.996474
ENSG00000095787	WAC	0.00978257	8.09437	0.996474
ENSG00000095794	CREM	-0.0340732	3.41565	0.996474
ENSG00000095906	NUBP2	-0.0308417	4.00308	0.996474
ENSG00000095932	SMIM24	0.0692884	1.97122	0.996474
ENSG00000096063	SRPK1	0.00883414	6.78304	0.996474
ENSG00000096070	BRPF3	-0.031582	4.65916	0.996474
ENSG00000096080	MRPS18A	-0.0139188	3.69982	0.996474
ENSG00000096092	TMEM14A	-0.00851563	1.60515	0.996474
ENSG00000096093	EFHC1	0.0409496	3.44897	0.996474
ENSG00000096384	HSP90AB1	-0.0378292	7.68084	0.996474
ENSG00000096401	CDC5L	-0.00877712	6.57412	0.996474
ENSG00000096433	ITPR3	0.022744	5.42376	0.996474
ENSG00000096746	HNRNPH3	0.0162408	6.27526	0.996474
ENSG00000096872	IFT74	0.0151539	2.96202	0.996474
ENSG00000096968	JAK2	0.0296907	7.72011	0.996474
ENSG00000096996	IL12RB1	-0.0253275	4.66919	0.996474
ENSG00000097007	ABL1	-0.00890491	3.92399	0.996474
ENSG00000097021	ACOT7	-0.0126112	0.672453	0.996474
ENSG00000097033	SH3GLB1	0.00932628	7.62853	0.996474
ENSG00000097046	CDC7	0.0514942	3.36147	0.996474
ENSG00000097096	SYDE2	-0.0582243	2.11109	0.996474
ENSG00000099139	PCSK5	-0.0377762	4.50062	0.996474
ENSG00000099194	SCD	0.0399197	1.83786	0.996474
ENSG00000099203	TMED1	-0.0325421	2.91346	0.996474
ENSG00000099204	ABLIM1	-0.041231	7.49496	0.996474
ENSG00000099219	ERMP1	0.00966492	5.46815	0.996474
ENSG00000099246	RAB18	0.0143645	6.49227	0.996474
ENSG00000099250	NRP1	0.0756514	1.71302	0.996474
ENSG00000099251	HSD17B7P2	0.0223322	2.76796	0.996474
ENSG00000099256	PRTFDC1	-0.0133867	0.0279754	0.996474
ENSG00000099282	TSPAN15	-0.0297904	0.441481	0.996474
ENSG00000099284	H2AFY2	0.0231687	1.03673	0.996474
ENSG00000099290	FAM21A	-0.00371382	5.24513	0.996474
ENSG00000099308	MAST3	-0.0356765	6.37612	0.996474
ENSG00000099326	MZF1	-0.0098998	4.10222	0.996474
ENSG00000099330	OCEL1	-0.0495803	1.59416	0.996474
ENSG00000099331	MYO9B	-0.0282265	7.63349	0.996474
ENSG00000099338	CATSPERG	0.0354964	2.35992	0.996474
ENSG00000099341	PSMD8	-0.0224795	5.52314	0.996474
ENSG00000099364	FBXL19	-0.0451685	2.87148	0.996474
ENSG00000099365	STX1B	-0.0212903	-1.91185	0.996474
ENSG00000099377	HSD3B7	0.021468	0.266404	0.996474
ENSG00000099381	SETD1A	0.0194484	1.94848	0.996474
ENSG00000099385	BCL7C	-0.0171508	3.45567	0.996474
ENSG00000099622	CIRBP	-0.0118671	7.66996	0.996474
ENSG00000099624	ATP5D	-0.0348404	1.58718	0.996474
ENSG00000099725	PRKY	0.0221977	1.59325	0.996474
ENSG00000099783	HNRNPM	-0.0282225	6.6691	0.996474
ENSG00000099795	NDUFB7	-0.00934797	2.99603	0.996474
ENSG00000099797	TECR	-0.0168262	3.25824	0.996474
ENSG00000099800	TIMM13	-0.0156327	2.86266	0.996474
ENSG00000099804	CDC34	0.0417311	7.03732	0.996474
ENSG00000099814	CEP170B	0.0325063	-1.35004	0.996474
ENSG00000099817	POLR2E	-0.0335781	4.33183	0.996474
ENSG00000099821	POLRMT	-0.0343517	4.2367	0.996474
ENSG00000099822	HCN2	-0.0566776	-1.85457	0.996474
ENSG00000099840	IZUMO4	-0.0712479	0.429879	0.996474
ENSG00000099849	RASSF7	-0.00673031	3.21637	0.996474
ENSG00000099860	GADD45B	-0.053255	4.87116	0.996474
ENSG00000099866	MADCAM1	0.155767	-1.46745	0.996474
ENSG00000099875	MKNK2	-0.0285047	6.6602	0.996474
ENSG00000099889	ARVCF	-0.0406787	1.39786	0.996474
ENSG00000099899	TRMT2A	-0.0284641	4.32088	0.996474
ENSG00000099901	RANBP1	0.0102662	3.53258	0.996474
ENSG00000099910	KLHL22	-0.00761347	5.11099	0.996474
ENSG00000099917	MED15	0.00791355	5.74672	0.996474
ENSG00000099940	SNAP29	-0.0359351	5.21145	0.996474
ENSG00000099942	CRKL	-0.0140855	7.34145	0.996474
ENSG00000099949	LZTR1	-0.0245053	5.05812	0.996474
ENSG00000099953	MMP11	0.0181167	-0.225208	0.996474
ENSG00000099956	SMARCB1	-0.0392689	3.49096	0.996474
ENSG00000099957	P2RX6	-0.142981	-1.48808	0.996474
ENSG00000099958	DERL3	0.0339178	0.572461	0.996474
ENSG00000099968	BCL2L13	0.00905664	5.95511	0.996474
ENSG00000099974	DDTL	0.182639	-0.754274	0.996474
ENSG00000099977	DDT	0.00810918	3.03585	0.996474
ENSG00000099985	OSM	-0.074546	2.61702	0.996474
ENSG00000099991	CABIN1	0.0049683	6.17156	0.996474
ENSG00000099992	TBC1D10A	-0.0341789	3.8122	0.996474
ENSG00000099994	SUSD2	0.155094	-1.8137	0.996474
ENSG00000099995	SF3A1	-0.0145484	5.52473	0.996474
ENSG00000099998	GGT5	0.064521	-1.09525	0.996474
ENSG00000099999	RNF215	0.0161753	2.04681	0.996474
ENSG00000100003	SEC14L2	-0.0111462	1.01253	0.996474
ENSG00000100023	PPIL2	-0.0241825	5.24933	0.996474
ENSG00000100024	UPB1	-0.0756785	1.41993	0.996474
ENSG00000100027	YPEL1	0.0179044	3.95912	0.996474
ENSG00000100028	SNRPD3	0.00409932	5.0348	0.996474
ENSG00000100029	PES1	-0.0197777	4.69192	0.996474
ENSG00000100030	MAPK1	-0.00233726	9.18434	0.996474
ENSG00000100031	GGT1	-0.0344141	3.06403	0.996474
ENSG00000100034	PPM1F	-0.0243127	7.41368	0.996474
ENSG00000100036	SLC35E4	0.0199031	0.359891	0.996474
ENSG00000100038	TOP3B	-0.0220188	4.67403	0.996474
ENSG00000100055	CYTH4	-0.00801383	8.77313	0.996474
ENSG00000100056	DGCR14	-0.0183728	4.17687	0.996474
ENSG00000100058	CRYBB2P1	-0.0339706	3.75921	0.996474
ENSG00000100060	MFNG	-0.0297312	5.91612	0.996474
ENSG00000100068	LRP5L	0.0318123	3.27637	0.996474
ENSG00000100075	SLC25A1	-0.033857	3.27773	0.996474
ENSG00000100083	GGA1	-0.00617938	4.63832	0.996474
ENSG00000100084	HIRA	-0.0495103	3.45597	0.996474
ENSG00000100095	SEZ6L	0.0281201	0.707584	0.996474
ENSG00000100097	LGALS1	-0.0126847	6.09812	0.996474
ENSG00000100099	HPS4	0.0077109	5.22155	0.996474
ENSG00000100100	PIK3IP1	-0.025877	7.36327	0.996474
ENSG00000100104	SRRD	0.01408	5.79922	0.996474
ENSG00000100105	PATZ1	-0.0155352	4.47904	0.996474
ENSG00000100106	TRIOBP	-0.0296398	5.46814	0.996474
ENSG00000100109	TFIP11	-0.0125726	6.20239	0.996474
ENSG00000100116	GCAT	0.16344	1.39385	0.996474
ENSG00000100124	ANKRD54	-0.0178896	2.7257	0.996474
ENSG00000100129	EIF3L	-0.00483917	7.47151	0.996474
ENSG00000100138	NHP2L1	-0.0150982	5.45415	0.996474
ENSG00000100139	MICALL1	-0.0180762	3.09028	0.996474
ENSG00000100147	CCDC134	-0.0139751	2.19975	0.996474
ENSG00000100151	PICK1	-0.0405951	3.17099	0.996474
ENSG00000100154	TTC28	-0.0916555	1.63069	0.996474
ENSG00000100181	TPTEP1	0.0654101	3.30332	0.996474
ENSG00000100197	CYP2D6	-0.0584837	-1.27052	0.996474
ENSG00000100201	DDX17	0.0107724	10.7848	0.996474
ENSG00000100206	DMC1	0.023879	-0.825157	0.996474
ENSG00000100209	HSCB	-0.0062932	1.93187	0.996474
ENSG00000100220	RTCB	-0.0115401	5.46251	0.996474
ENSG00000100221	JOSD1	0.00312315	5.70201	0.996474
ENSG00000100225	FBXO7	0.054657	9.97776	0.996474
ENSG00000100227	POLDIP3	-0.0180428	6.29832	0.996474
ENSG00000100228	RAB36	-0.0699654	0.459934	0.996474
ENSG00000100239	PPP6R2	-0.0108859	5.7769	0.996474
ENSG00000100241	SBF1	-0.0262023	6.26362	0.996474
ENSG00000100242	SUN2	-0.0289319	8.39462	0.996474
ENSG00000100243	CYB5R3	-0.00979422	4.08735	0.996474
ENSG00000100246	DNAL4	0.00811677	2.31901	0.996474
ENSG00000100263	RHBDD3	-0.0129406	2.10878	0.996474
ENSG00000100266	PACSIN2	-0.0374231	7.47666	0.996474
ENSG00000100271	TTLL1	0.0212646	2.19788	0.996474
ENSG00000100281	HMGXB4	0.0114599	4.2559	0.996474
ENSG00000100284	TOM1	-0.049294	5.63367	0.996474
ENSG00000100285	NEFH	0.0189077	-0.415277	0.996474
ENSG00000100288	CHKB	0.0102782	1.228	0.996474
ENSG00000100290	BIK	-0.0202015	-0.0395207	0.996474
ENSG00000100292	HMOX1	-0.0365388	4.9281	0.996474
ENSG00000100294	MCAT	-0.0450675	2.1777	0.996474
ENSG00000100296	THOC5	-0.00480815	6.05838	0.996474
ENSG00000100297	MCM5	-0.00843164	5.35047	0.996474
ENSG00000100298	APOBEC3H	-0.0374691	0.656714	0.996474
ENSG00000100300	TSPO	-0.0122155	6.16599	0.996474
ENSG00000100304	TTLL12	0.0126402	3.58634	0.996474
ENSG00000100307	CBX7	-0.0122828	6.29614	0.996474
ENSG00000100316	RPL3	0.0176844	9.22818	0.996474
ENSG00000100319	ZMAT5	-0.0404633	3.23355	0.996474
ENSG00000100320	RBFOX2	-0.0573586	0.0379842	0.996474
ENSG00000100321	SYNGR1	-0.0896716	1.02777	0.996474
ENSG00000100324	TAB1	0.0109603	3.79937	0.996474
ENSG00000100325	ASCC2	0.0143669	7.90607	0.996474
ENSG00000100330	MTMR3	-0.0132948	7.87574	0.996474
ENSG00000100335	MIEF1	0.00985595	4.68289	0.996474
ENSG00000100336	APOL4	0.054511	-0.121155	0.996474
ENSG00000100342	APOL1	-0.0114214	4.85583	0.996474
ENSG00000100345	MYH9	-0.0316195	9.82104	0.996474
ENSG00000100347	SAMM50	0.00345345	4.7182	0.996474
ENSG00000100350	FOXRED2	-0.160115	-0.605316	0.996474
ENSG00000100351	GRAP2	-0.0126467	6.85848	0.996474
ENSG00000100353	EIF3D	-0.0108543	7.36684	0.996474
ENSG00000100354	TNRC6B	-0.00760461	8.3964	0.996474
ENSG00000100359	SGSM3	-0.0241618	4.68918	0.996474
ENSG00000100360	IFT27	0.0211025	3.65138	0.996474
ENSG00000100364	KIAA0930	-0.0133476	5.72846	0.996474
ENSG00000100365	NCF4	-0.0388858	6.8762	0.996474
ENSG00000100368	CSF2RB	-0.0201387	8.55367	0.996474
ENSG00000100372	SLC25A17	-0.00368413	3.47865	0.996474
ENSG00000100373	UPK3A	-0.0435554	-0.0956737	0.996474
ENSG00000100379	KCTD17	-0.0523941	2.15421	0.996474
ENSG00000100385	IL2RB	-0.0361144	4.60756	0.996474
ENSG00000100387	RBX1	0.0519816	4.65213	0.996474
ENSG00000100395	L3MBTL2	-0.0122165	4.74245	0.996474
ENSG00000100399	CHADL	-0.0984538	-1.98278	0.996474
ENSG00000100401	RANGAP1	-0.0314764	4.87412	0.996474
ENSG00000100403	ZC3H7B	-0.0120753	4.98951	0.996474
ENSG00000100410	PHF5A	0.0141806	3.3212	0.996474
ENSG00000100413	POLR3H	-0.0346641	4.21839	0.996474
ENSG00000100416	TRMU	-0.0167517	4.86403	0.996474
ENSG00000100417	PMM1	-0.00964461	2.77835	0.996474
ENSG00000100422	CERK	-0.00418993	7.20291	0.996474
ENSG00000100425	BRD1	0.00475646	5.67134	0.996474
ENSG00000100426	ZBED4	-0.0126786	5.23339	0.996474
ENSG00000100427	MLC1	-0.025464	3.25422	0.996474
ENSG00000100429	HDAC10	-0.0884698	0.871048	0.996474
ENSG00000100433	KCNK10	-0.0801258	-1.10442	0.996474
ENSG00000100439	ABHD4	-0.00898435	4.69409	0.996474
ENSG00000100442	FKBP3	0.0293917	3.89967	0.996474
ENSG00000100445	SDR39U1	-0.00942904	4.44404	0.996474
ENSG00000100453	GZMB	-0.0441862	5.72714	0.996474
ENSG00000100461	RBM23	-0.0294844	7.30922	0.996474
ENSG00000100462	PRMT5	-0.0318224	4.76705	0.996474
ENSG00000100478	AP4S1	0.0273613	4.064	0.996474
ENSG00000100479	POLE2	0.0382273	2.29322	0.996474
ENSG00000100483	VCPKMT	0.0347897	4.52026	0.996474
ENSG00000100485	SOS2	0.00693723	7.42144	0.996474
ENSG00000100490	CDKL1	0.0198445	4.02422	0.996474
ENSG00000100503	NIN	-0.00623502	9.24268	0.996474
ENSG00000100504	PYGL	-0.0320085	8.51084	0.996474
ENSG00000100519	PSMC6	0.0133758	5.34838	0.996474
ENSG00000100522	GNPNAT1	0.00974767	3.46502	0.996474
ENSG00000100523	DDHD1	0.0176152	6.923	0.996474
ENSG00000100526	CDKN3	0.0728335	-0.474469	0.996474
ENSG00000100532	CGRRF1	0.0223864	3.38535	0.996474
ENSG00000100554	ATP6V1D	0.02522	5.32404	0.996474
ENSG00000100567	PSMA3	0.0431039	4.39038	0.996474
ENSG00000100568	VTI1B	0.0326503	6.82438	0.996474
ENSG00000100575	TIMM9	0.0720169	1.40521	0.996474
ENSG00000100578	KIAA0586	0.0144469	5.82619	0.996474
ENSG00000100583	SAMD15	-0.0290908	-0.802821	0.996474
ENSG00000100592	DAAM1	0.00896254	4.0175	0.996474
ENSG00000100596	SPTLC2	-0.00613622	7.60966	0.996474
ENSG00000100599	RIN3	-0.0126687	5.56458	0.996474
ENSG00000100600	LGMN	-0.0249611	1.30109	0.996474
ENSG00000100603	SNW1	0.00412293	5.99367	0.996474
ENSG00000100605	ITPK1	-0.0221892	6.62257	0.996474
ENSG00000100612	DHRS7	-0.0179743	6.6895	0.996474
ENSG00000100614	PPM1A	0.0321548	8.18978	0.996474
ENSG00000100628	ASB2	0.0588672	1.9139	0.996474
ENSG00000100629	CEP128	0.0222235	4.66663	0.996474
ENSG00000100632	ERH	0.0296659	4.13426	0.996474
ENSG00000100644	HIF1A	-0.0276506	7.73844	0.996474
ENSG00000100647	SUSD6	-0.00596194	6.35255	0.996474
ENSG00000100650	SRSF5	0.00575713	8.46299	0.996474
ENSG00000100664	EIF5	0.00839475	7.76991	0.996474
ENSG00000100678	SLC8A3	0.0831548	-0.0691295	0.996474
ENSG00000100697	DICER1	-0.00462156	8.65301	0.996474
ENSG00000100711	ZFYVE21	-0.00824176	3.81538	0.996474
ENSG00000100714	MTHFD1	0.0076092	4.41425	0.996474
ENSG00000100721	TCL1A	-0.0458614	4.54147	0.996474
ENSG00000100726	TELO2	-0.0269086	3.12248	0.996474
ENSG00000100731	PCNX	-0.0146005	9.23626	0.996474
ENSG00000100744	GSKIP	0.0329878	4.30508	0.996474
ENSG00000100749	VRK1	0.0362245	4.93457	0.996474
ENSG00000100764	PSMC1	-0.0180996	4.68985	0.996474
ENSG00000100784	RPS6KA5	0.020504	7.06701	0.996474
ENSG00000100796	SMEK1	0.00918365	7.52767	0.996474
ENSG00000100802	C14orf93	-0.00463491	3.4956	0.996474
ENSG00000100804	PSMB5	-0.0351265	3.8546	0.996474
ENSG00000100813	ACIN1	-0.0120953	7.87034	0.996474
ENSG00000100815	TRIP11	0.0199702	6.37259	0.996474
ENSG00000100823	APEX1	-0.0126827	5.07118	0.996474
ENSG00000100836	PABPN1	0.0113669	4.84487	0.996474
ENSG00000100865	CINP	-0.0231698	4.3482	0.996474
ENSG00000100883	SRP54	0.0202452	5.73893	0.996474
ENSG00000100888	CHD8	-0.0114778	7.41492	0.996474
ENSG00000100889	PCK2	0.01037	3.04079	0.996474
ENSG00000100890	KIAA0391	0.027361	3.70314	0.996474
ENSG00000100897	DCAF11	-0.00982807	6.85608	0.996474
ENSG00000100902	PSMA6	0.0230955	3.54609	0.996474
ENSG00000100906	NFKBIA	-0.0320696	7.1513	0.996474
ENSG00000100908	EMC9	-0.0420059	1.4065	0.996474
ENSG00000100911	PSME2	0.0081202	5.45995	0.996474
ENSG00000100918	REC8	-0.0244885	2.89588	0.996474
ENSG00000100926	TM9SF1	-0.0359398	1.51671	0.996474
ENSG00000100934	SEC23A	-0.0046589	6.34208	0.996474
ENSG00000100938	GMPR2	-0.00652089	6.39012	0.996474
ENSG00000100941	PNN	0.0129646	6.58415	0.996474
ENSG00000100949	RABGGTA	-0.0370977	2.94269	0.996474
ENSG00000100979	PLTP	-0.0258985	-0.60665	0.996474
ENSG00000100982	PCIF1	-0.0258132	4.85732	0.996474
ENSG00000100983	GSS	-0.0271801	3.84076	0.996474
ENSG00000100985	MMP9	-0.0857962	5.15959	0.996474
ENSG00000100991	TRPC4AP	-0.0131525	7.10884	0.996474
ENSG00000100994	PYGB	-0.0570132	5.50508	0.996474
ENSG00000101000	PROCR	0.0516994	-0.0400331	0.996474
ENSG00000101003	GINS1	-0.0254346	-0.27728	0.996474
ENSG00000101004	NINL	-0.0692124	0.77816	0.996474
ENSG00000101017	CD40	0.0393567	3.34953	0.996474
ENSG00000101019	UQCC1	-0.00594063	5.01843	0.996474
ENSG00000101040	ZMYND8	0.00744216	6.46446	0.996474
ENSG00000101049	SGK2	0.101503	-1.4683	0.996474
ENSG00000101052	IFT52	0.0475018	4.16063	0.996474
ENSG00000101057	MYBL2	0.0355379	2.20078	0.996474
ENSG00000101079	NDRG3	-0.0125547	5.22414	0.996474
ENSG00000101082	SLA2	-0.0569129	5.35864	0.996474
ENSG00000101084	C20orf24	-0.0319173	3.83316	0.996474
ENSG00000101096	NFATC2	-0.0204446	5.99635	0.996474
ENSG00000101109	STK4	-0.00708575	9.66304	0.996474
ENSG00000101126	ADNP	-0.00291247	6.98902	0.996474
ENSG00000101132	PFDN4	-0.0303857	1.35106	0.996474
ENSG00000101138	CSTF1	0.00676908	5.02795	0.996474
ENSG00000101146	RAE1	-0.016032	5.05581	0.996474
ENSG00000101150	TPD52L2	-0.0228969	7.0012	0.996474
ENSG00000101152	DNAJC5	-0.0299983	6.9805	0.996474
ENSG00000101158	NELFCD	0.0212872	5.22666	0.996474
ENSG00000101160	CTSZ	-0.0238157	7.47132	0.996474
ENSG00000101161	PRPF6	-0.0239616	6.40714	0.996474
ENSG00000101162	TUBB1	-0.0312308	7.65943	0.996474
ENSG00000101166	SLMO2	0.0170311	5.34434	0.996474
ENSG00000101181	MTG2	-0.0267927	4.33184	0.996474
ENSG00000101182	PSMA7	-0.00480434	6.07329	0.996474
ENSG00000101187	SLCO4A1	0.0946742	-1.19429	0.996474
ENSG00000101188	NTSR1	-0.0236523	-1.83517	0.996474
ENSG00000101189	MRGBP	-0.0169106	3.44759	0.996474
ENSG00000101190	TCFL5	-0.0298727	3.30735	0.996474
ENSG00000101191	DIDO1	-0.0133227	7.38276	0.996474
ENSG00000101193	GID8	0.00744075	6.1193	0.996474
ENSG00000101194	SLC17A9	-0.0413445	1.78388	0.996474
ENSG00000101199	ARFGAP1	-0.0155712	4.6565	0.996474
ENSG00000101213	PTK6	0.0287641	-0.457415	0.996474
ENSG00000101216	GMEB2	-0.00995312	4.45566	0.996474
ENSG00000101220	C20orf27	-0.00635904	2.86415	0.996474
ENSG00000101224	CDC25B	-0.00764026	5.21551	0.996474
ENSG00000101230	ISM1	-0.0831023	0.930364	0.996474
ENSG00000101236	RNF24	-0.032345	7.33548	0.996474
ENSG00000101246	ARFRP1	-0.0244994	5.39951	0.996474
ENSG00000101247	NDUFAF5	0.0117806	3.74952	0.996474
ENSG00000101255	TRIB3	0.045354	2.19514	0.996474
ENSG00000101265	RASSF2	-0.0185804	10.0854	0.996474
ENSG00000101266	CSNK2A1	0.00211619	6.21173	0.996474
ENSG00000101294	HM13	-0.0153039	6.04261	0.996474
ENSG00000101298	SNPH	-0.0606901	2.76138	0.996474
ENSG00000101307	SIRPB1	-0.0558229	6.09881	0.996474
ENSG00000101310	SEC23B	-0.0161714	6.24091	0.996474
ENSG00000101333	PLCB4	-0.0367868	-1.68832	0.996474
ENSG00000101335	MYL9	0.0386901	1.05545	0.996474
ENSG00000101336	HCK	-0.0267241	8.85409	0.996474
ENSG00000101343	CRNKL1	-0.00615	6.45731	0.996474
ENSG00000101346	POFUT1	-0.0100205	4.64016	0.996474
ENSG00000101347	SAMHD1	0.00681321	8.64873	0.996474
ENSG00000101350	KIF3B	0.0172809	5.37956	0.996474
ENSG00000101353	MROH8	-0.041627	0.376268	0.996474
ENSG00000101361	NOP56	-0.00716787	5.96504	0.996474
ENSG00000101363	MANBAL	-0.0262653	3.46027	0.996474
ENSG00000101365	IDH3B	-0.0395322	5.36425	0.996474
[truncated: 19,639 more rows]

## Sheet: AD vs. RRS
Ensembl gene ID	HUGO gene symbol	Log fold change	Average expression	FDR
ENSG00000154165	GPR15	0.354058	4.32812	1.82338e-07
ENSG00000163788	SNRK	-0.0659899	8.40708	2.96231e-07
ENSG00000163629	PTPN13	0.21294	3.63096	6.12625e-07
ENSG00000253981	ALG1L13P	-0.209741	4.01933	4.21411e-06
ENSG00000135218	CD36	0.138383	7.57545	7.78715e-06
ENSG00000007944	MYLIP	-0.0989624	6.69751	1.8731e-05
ENSG00000012232	EXTL3	-0.106706	6.44067	1.8731e-05
ENSG00000115604	IL18R1	-0.14791	5.60212	1.8731e-05
ENSG00000116863	ADPRHL2	-0.099239	4.63179	1.8731e-05
ENSG00000132670	PTPRA	0.0802284	6.30302	1.8731e-05
ENSG00000076685	NT5C2	-0.0648538	7.80251	2.18669e-05
ENSG00000184602	SNN	-0.111544	7.21523	2.18669e-05
ENSG00000135018	UBQLN1	0.0577265	7.53256	2.55506e-05
ENSG00000100644	HIF1A	-0.0889152	7.73844	2.61646e-05
ENSG00000166439	RNF169	-0.0486997	7.87669	5.7965e-05
ENSG00000011422	PLAUR	-0.121989	5.95518	6.04126e-05
ENSG00000148450	MSRB2	-0.134646	3.44738	7.17874e-05
ENSG00000110446	SLC15A3	-0.0886613	5.82367	7.69087e-05
ENSG00000006715	VPS41	-0.0540307	7.05318	9.57072e-05
ENSG00000035664	DAPK2	-0.126309	6.19067	9.57072e-05
ENSG00000057704	TMCC3	-0.112796	6.84438	9.57072e-05
ENSG00000072274	TFRC	0.133716	6.79739	9.57072e-05
ENSG00000120129	DUSP1	-0.120328	7.84636	9.57072e-05
ENSG00000147324	MFHAS1	0.110465	5.49965	9.57072e-05
ENSG00000152484	USP12	0.202566	6.59249	9.57072e-05
ENSG00000165434	PGM2L1	0.123373	4.62979	9.57072e-05
ENSG00000169621	APLF	0.129139	3.45992	9.57072e-05
ENSG00000184588	PDE4B	-0.0739337	7.22682	9.57072e-05
ENSG00000196684	HSH2D	-0.12127	6.27729	9.57072e-05
ENSG00000266094	RASSF5	-0.0505723	8.34801	9.57072e-05
ENSG00000109674	NEIL3	0.256778	3.69061	0.000113952
ENSG00000011198	ABHD5	-0.106231	6.91051	0.000120189
ENSG00000164674	SYTL3	-0.105154	5.75819	0.0001236
ENSG00000172794	RAB37	-0.0874102	6.58613	0.0001236
ENSG00000132965	ALOX5AP	-0.121154	7.40096	0.000137078
ENSG00000134905	CARS2	-0.0713742	6.5995	0.000137825
ENSG00000158050	DUSP2	-0.22202	3.32794	0.000137825
ENSG00000152270	PDE3B	-0.0821174	7.78038	0.000154671
ENSG00000060491	OGFR	-0.0939084	6.50788	0.000169351
ENSG00000116017	ARID3A	-0.102942	5.38226	0.000169351
ENSG00000149483	TMEM138	0.0736273	4.60925	0.000169351
ENSG00000198873	GRK5	-0.0766473	5.08459	0.000169351
ENSG00000185905	C16orf54	-0.0817876	7.43355	0.000188885
ENSG00000110958	PTGES3	0.0933837	5.99537	0.000190444
ENSG00000055732	MCOLN3	0.30533	0.403279	0.000194313
ENSG00000198771	RCSD1	-0.0553585	8.27526	0.000207024
ENSG00000137804	NUSAP1	0.193854	3.63503	0.000246094
ENSG00000139323	POC1B	0.102484	5.26985	0.000246094
ENSG00000179562	GCC1	-0.0589379	6.06997	0.000246094
ENSG00000155926	SLA	-0.0637033	9.19438	0.000251181
ENSG00000135776	ABCB10	0.116651	5.60221	0.000255531
ENSG00000118113	MMP8	0.422272	2.6768	0.000255846
ENSG00000173825	TIGD3	-0.172744	3.0018	0.000257887
ENSG00000023734	STRAP	0.0869297	3.80729	0.000265766
ENSG00000125347	IRF1	-0.0856832	9.42295	0.000269045
ENSG00000173812	EIF1	0.080462	6.77622	0.000269045
ENSG00000180353	HCLS1	-0.0591122	9.24919	0.000269045
ENSG00000124226	RNF114	-0.0440232	6.46726	0.000272196
ENSG00000143815	LBR	-0.065094	8.39959	0.000272196
ENSG00000146122	DAAM2	-0.481409	1.58915	0.000278778
ENSG00000165480	SKA3	0.229157	2.50453	0.000282724
ENSG00000204592	HLA-E	-0.0851339	11.4346	0.000282724
ENSG00000134830	C5AR2	-0.0953976	7.04749	0.000288534
ENSG00000163808	KIF15	0.208792	2.07138	0.000292595
ENSG00000188186	LAMTOR4	-0.0923482	5.89538	0.000292595
ENSG00000205531	NAP1L4	0.0660225	7.49633	0.000292595
ENSG00000214717	ZBED1	-0.0781559	5.80366	0.000292595
ENSG00000230006	ANKRD36BP2	0.282802	5.06535	0.000292595
ENSG00000179542	SLITRK4	0.152697	2.68746	0.000331956
ENSG00000130775	THEMIS2	-0.078571	8.59226	0.000342376
ENSG00000155962	CLIC2	0.193367	3.24711	0.000351142
ENSG00000143546	S100A8	0.24263	8.31711	0.000359265
ENSG00000151893	CACUL1	-0.0552013	7.56471	0.000359265
ENSG00000080839	RBL1	0.0706822	5.14765	0.000391418
ENSG00000131669	NINJ1	-0.124207	5.8242	0.000404577
ENSG00000132964	CDK8	0.0862934	4.01205	0.000404577
ENSG00000134686	PHC2	-0.121123	6.94768	0.000405726
ENSG00000153395	LPCAT1	-0.073607	6.79819	0.000451618
ENSG00000118777	ABCG2	0.258779	2.4206	0.000481342
ENSG00000163462	TRIM46	0.198651	0.186865	0.000481342
ENSG00000116675	DNAJC6	0.224033	4.29476	0.000493237
ENSG00000136816	TOR1B	-0.105716	5.42747	0.000503481
ENSG00000076662	ICAM3	-0.107312	8.6795	0.000505753
ENSG00000237359	RP11-509J21.2	0.211679	0.751257	0.000505753
ENSG00000196562	SULF2	-0.105286	7.43171	0.000506009
ENSG00000113719	ERGIC1	-0.0823785	7.75395	0.000510978
ENSG00000086730	LAT2	-0.0800657	7.18763	0.000539162
ENSG00000141526	SLC16A3	-0.11376	7.48184	0.000539162
ENSG00000163050	ADCK3	-0.0910615	5.70868	0.000539162
ENSG00000134330	IAH1	0.0615547	4.67583	0.000547734
ENSG00000111737	RAB35	-0.0655695	5.40734	0.000552625
ENSG00000123240	OPTN	0.147116	7.11429	0.000552625
ENSG00000180875	GREM2	0.326263	-0.56713	0.000557999
ENSG00000126759	CFP	-0.0917449	7.31808	0.000562082
ENSG00000170345	FOS	-0.117639	6.22928	0.000562082
ENSG00000210082	MT-RNR2	0.20304	10.2668	0.000562082
ENSG00000029153	ARNTL2	0.192973	0.964464	0.000562744
ENSG00000174485	DENND4A	0.0703448	8.23043	0.000566556
ENSG00000276317	RP11-93B14.10	-0.133294	1.74436	0.000566556
ENSG00000136156	ITM2B	-0.0734776	10.3339	0.000566907
ENSG00000073737	DHRS9	-0.17091	5.25726	0.000577317
ENSG00000101639	CEP192	0.0559865	7.43445	0.000592913
ENSG00000100749	VRK1	0.148857	4.93457	0.000597737
ENSG00000008130	NADK	-0.0925211	7.84284	0.000600652
ENSG00000146859	TMEM140	-0.0967762	7.40929	0.000600652
ENSG00000175582	RAB6A	0.0797486	6.80169	0.000600652
ENSG00000176749	CDK5R1	-0.135233	3.93101	0.000600652
ENSG00000254470	AP5B1	-0.102805	6.51002	0.000600652
ENSG00000178935	ZNF552	-0.0677082	4.56715	0.000605064
ENSG00000183576	SETD3	0.0663371	6.05847	0.000616115
ENSG00000102445	KIAA0226L	-0.115551	6.51706	0.000625341
ENSG00000106462	EZH2	0.0970395	3.31253	0.000625341
ENSG00000165175	MID1IP1	-0.0877335	5.80878	0.000625341
ENSG00000170892	TSEN34	-0.0953132	6.00362	0.000625341
ENSG00000186517	ARHGAP30	-0.0594604	9.05144	0.000625341
ENSG00000160179	ABCG1	-0.172921	5.34946	0.000644816
ENSG00000139112	GABARAPL1	-0.0734841	6.36328	0.000648589
ENSG00000101460	MAP1LC3A	-0.196461	1.1547	0.000659121
ENSG00000119986	AVPI1	-0.226181	0.0614582	0.000662255
ENSG00000111145	ELK3	0.064117	4.72034	0.000717987
ENSG00000104219	ZDHHC2	0.0974829	6.67056	0.000737534
ENSG00000234745	HLA-B	-0.0946233	11.4961	0.000737534
ENSG00000277496	RP11-93B14.9	-0.101278	3.44364	0.000745647
ENSG00000139842	CUL4A	0.0707415	6.87159	0.000759738
ENSG00000189077	TMEM120A	-0.0952782	4.51184	0.000759738
ENSG00000121152	NCAPH	0.16554	1.18979	0.000774216
ENSG00000145741	BTF3	0.107925	7.23566	0.000774216
ENSG00000110330	BIRC2	0.0884457	7.269	0.000782843
ENSG00000006652	IFRD1	-0.0729857	7.2344	0.000785332
ENSG00000100387	RBX1	0.111486	4.65213	0.000785332
ENSG00000114166	KAT2B	0.108564	8.05696	0.000785332
ENSG00000128383	APOBEC3A	-0.112366	7.2625	0.000785332
ENSG00000133112	TPT1	0.218806	9.26392	0.000785332
ENSG00000149212	SESN3	0.121924	8.30836	0.000785332
ENSG00000154957	ZNF18	-0.0529442	4.97163	0.000785332
ENSG00000169871	TRIM56	-0.059046	7.33534	0.000785332
ENSG00000172977	KAT5	-0.0578116	5.31648	0.000785332
ENSG00000197329	PELI1	-0.0718212	8.03052	0.000785332
ENSG00000173334	TRIB1	-0.0832028	5.45548	0.000798851
ENSG00000223336	RNU2-6P	-0.192896	0.499143	0.000820641
ENSG00000012983	MAP4K5	0.0715007	5.95646	0.000830805
ENSG00000085514	PILRA	-0.101535	5.08085	0.000832003
ENSG00000182885	GPR97	-0.141838	6.12073	0.000832003
ENSG00000125257	ABCC4	0.14991	5.70965	0.000840789
ENSG00000110888	CAPRIN2	0.0817887	5.88413	0.000844119
ENSG00000164125	FAM198B	0.102594	5.95186	0.000891665
ENSG00000197562	RAB40C	-0.093753	3.42474	0.000904588
ENSG00000040199	PHLPP2	0.116337	5.30552	0.000907117
ENSG00000105851	PIK3CG	-0.046997	7.63373	0.000907117
ENSG00000125651	GTF2F1	-0.0763321	5.36879	0.000907117
ENSG00000102384	CENPI	0.168474	1.69316	0.000935109
ENSG00000131242	RAB11FIP4	-0.0719398	7.06121	0.000935109
ENSG00000138376	BARD1	0.0928442	4.28654	0.000935109
ENSG00000157045	NTAN1	0.112746	4.28855	0.000935109
ENSG00000100034	PPM1F	-0.0905656	7.41368	0.000945702
ENSG00000108924	HLF	0.203415	0.359147	0.000947037
ENSG00000135604	STX11	-0.0988518	6.13322	0.000997465
ENSG00000112077	RHAG	0.24827	1.79985	0.00100655
ENSG00000123349	PFDN5	0.176988	6.16914	0.00101964
ENSG00000277586	NEFL	0.262509	1.88728	0.00108221
ENSG00000117859	OSBPL9	-0.0405773	6.6536	0.00109607
ENSG00000115993	TRAK2	0.14632	7.89361	0.00109752
ENSG00000186074	CD300LF	-0.0697857	5.86766	0.00109898
ENSG00000113758	DBN1	-0.141471	2.51569	0.00110218
ENSG00000100991	TRPC4AP	-0.0380029	7.10884	0.00111017
ENSG00000140995	DEF8	-0.0768127	6.84447	0.00111017
ENSG00000163374	YY1AP1	0.084269	6.01085	0.00111017
ENSG00000163393	SLC22A15	-0.0879961	6.09611	0.00111017
ENSG00000176845	METRNL	-0.104557	5.04853	0.00116444
ENSG00000124172	ATP5E	0.118656	6.76152	0.0011727
ENSG00000127824	TUBA4A	-0.0890851	6.93227	0.00122705
ENSG00000101343	CRNKL1	-0.0495365	6.45731	0.00124419
ENSG00000004897	CDC27	0.0744391	6.89618	0.00125065
ENSG00000138678	AGPAT9	-0.0974312	5.78969	0.00127068
ENSG00000010017	RANBP9	0.066105	5.68735	0.00127213
ENSG00000153574	RPIA	0.17978	5.86275	0.00127258
ENSG00000114948	ADAM23	0.235796	2.88601	0.00127924
ENSG00000164484	TMEM200A	0.186349	1.0876	0.00129311
ENSG00000051108	HERPUD1	-0.0434749	6.67981	0.00129691
ENSG00000102879	CORO1A	-0.0959526	8.79685	0.00133133
ENSG00000182022	CHST15	-0.0825541	8.62969	0.00133133
ENSG00000189067	LITAF	-0.091657	9.57521	0.00135614
ENSG00000146826	C7orf43	-0.0772049	5.20384	0.00140382
ENSG00000009307	CSDE1	0.0575373	9.40705	0.00142413
ENSG00000101782	RIOK3	0.17626	8.49099	0.00146542
ENSG00000130703	OSBPL2	-0.0563013	6.98649	0.00146709
ENSG00000175137	SH3BP5L	-0.0710172	6.42419	0.00146709
ENSG00000265972	TXNIP	-0.0925718	11.9931	0.00146709
ENSG00000136938	ANP32B	0.129005	5.10858	0.00150205
ENSG00000137812	CASC5	0.13818	3.35018	0.00150205
ENSG00000226057	PHF2P2	0.300169	-1.10196	0.00150205
ENSG00000001084	GCLC	0.112825	5.32217	0.00151857
ENSG00000130592	LSP1	-0.102665	8.51305	0.00152631
ENSG00000135823	STX6	-0.0412202	6.22036	0.0015668
ENSG00000187116	LILRA5	-0.135277	7.04186	0.00161806
ENSG00000090432	MUL1	-0.067313	4.45097	0.00164748
ENSG00000076043	REXO2	0.0790047	4.47459	0.00166374
ENSG00000161533	ACOX1	-0.0799025	7.73386	0.00173331
ENSG00000127184	COX7C	0.177864	4.64015	0.00173412
ENSG00000164054	SHISA5	-0.0911455	7.32922	0.00173412
ENSG00000172985	SH3RF3	-0.169877	2.34628	0.00173412
ENSG00000005893	LAMP2	-0.0619998	8.33075	0.00174354
ENSG00000182149	IST1	-0.0342352	7.74775	0.00175469
ENSG00000233387	RP11-342D11.3	0.155286	1.95404	0.00175807
ENSG00000154856	APCDD1	0.256019	-0.306119	0.00181977
ENSG00000143164	DCAF6	0.0981802	6.07884	0.0018225
ENSG00000197006	METTL9	0.0879708	7.08899	0.0018258
ENSG00000101150	TPD52L2	-0.0584204	7.0012	0.00182992
ENSG00000163877	SNIP1	-0.0474542	5.1474	0.00182992
ENSG00000188906	LRRK2	-0.0866214	10.6807	0.00183404
ENSG00000166503	HDGFRP3	0.163425	3.02416	0.00187297
ENSG00000104142	VPS18	-0.076108	5.28621	0.00187796
ENSG00000186184	POLR1D	0.10593	6.12857	0.00187796
ENSG00000022277	RTFDC1	-0.0507648	6.9542	0.00188639
ENSG00000149923	PPP4C	-0.0795043	6.05527	0.00191702
ENSG00000123444	KBTBD4	-0.0529076	4.79688	0.00191836
ENSG00000178685	PARP10	-0.122571	5.84241	0.00191836
ENSG00000173391	OLR1	0.352696	0.160861	0.00198004
ENSG00000100614	PPM1A	0.103692	8.18978	0.00199522
ENSG00000243836	WDR86-AS1	0.172466	2.19996	0.00199522
ENSG00000112486	CCR6	0.14863	1.48873	0.00201157
ENSG00000145354	CISD2	0.172616	4.68605	0.00201157
ENSG00000114346	ECT2	0.103497	3.44582	0.00203307
ENSG00000158517	NCF1	-0.118271	6.83172	0.00206725
ENSG00000225873	LINC00694	-0.13393	3.01338	0.00206725
ENSG00000010539	ZNF200	-0.0562016	5.49908	0.00208216
ENSG00000223509	RP11-632K20.7	0.120448	3.11029	0.00209416
ENSG00000110046	ATG2A	-0.129127	4.89671	0.00210339
ENSG00000136167	LCP1	-0.0629591	11.3671	0.00210948
ENSG00000136492	BRIP1	0.114243	3.00565	0.0021108
ENSG00000145868	FBXO38	-0.0402371	7.45488	0.00214908
ENSG00000124731	TREM1	-0.103466	7.61747	0.00215987
ENSG00000140057	AK7	0.297377	-1.71259	0.00215987
ENSG00000213903	LTB4R	-0.0788455	5.838	0.00215987
ENSG00000229358	DPY19L1P1	0.188551	2.47005	0.00215987
ENSG00000112335	SNX3	0.13469	7.2464	0.00216129
ENSG00000100461	RBM23	-0.0484427	7.30922	0.00216233
ENSG00000123810	B9D2	-0.0922915	3.097	0.00217198
ENSG00000105656	ELL	-0.0831563	5.46497	0.00227114
ENSG00000124107	SLPI	0.226158	2.91222	0.00227177
ENSG00000125384	PTGER2	0.0711083	5.50542	0.00228548
ENSG00000144468	RHBDD1	0.0972732	6.11058	0.00228548
ENSG00000188672	RHCE	0.258086	0.816436	0.00228548
ENSG00000089041	P2RX7	0.0837006	4.71315	0.00232539
ENSG00000103313	MEFV	-0.0808134	7.97928	0.00232716
ENSG00000173535	TNFRSF10C	-0.0922263	8.94446	0.00233086
ENSG00000139192	TAPBPL	-0.0734653	5.45174	0.00234141
ENSG00000152078	TMEM56	0.216235	3.05807	0.00234866
ENSG00000143198	MGST3	0.068838	4.7087	0.00236439
ENSG00000169895	SYAP1	-0.0537984	5.50119	0.00236439
ENSG00000049759	NEDD4L	0.155268	3.73226	0.00236702
ENSG00000146576	C7orf26	-0.0540642	4.51712	0.0023735
ENSG00000242258	LINC00996	-0.192286	0.409424	0.00240119
ENSG00000004059	ARF5	-0.0632515	4.84475	0.00241398
ENSG00000140044	JDP2	-0.0773817	4.86624	0.00241398
ENSG00000008952	SEC62	0.100517	7.04334	0.00243836
ENSG00000103510	KAT8	-0.0510366	5.85015	0.00243836
ENSG00000162413	KLHL21	-0.070299	6.45441	0.00251377
ENSG00000240509	RPL34P18	0.340995	-2.49007	0.00251456
ENSG00000114999	TTL	0.0605245	4.93927	0.00251857
ENSG00000143776	CDC42BPA	0.171217	3.87776	0.00251857
ENSG00000115325	DOK1	-0.0743891	5.05574	0.0025272
ENSG00000106009	BRAT1	-0.0811325	4.74126	0.00252941
ENSG00000147439	BIN3	-0.0569459	5.48975	0.00257451
ENSG00000239998	LILRA2	-0.0862201	6.5684	0.00257451
ENSG00000116668	SWT1	0.116479	5.01457	0.00264232
ENSG00000143167	GPA33	-0.11677	2.54197	0.00264232
ENSG00000224177	LINC00570	0.242749	2.13603	0.00264232
ENSG00000167703	SLC43A2	-0.0910134	6.75932	0.0026507
ENSG00000117410	ATP6V0B	-0.0740294	7.11428	0.00265527
ENSG00000160588	MPZL3	-0.0717836	7.19235	0.00265527
ENSG00000165879	FRAT1	-0.078366	6.32708	0.00265527
ENSG00000196549	MME	-0.113362	8.97513	0.00265527
ENSG00000198176	TFDP1	0.139322	6.04717	0.00265527
ENSG00000274425	AC114271.2	-0.221266	-0.711725	0.00265559
ENSG00000102010	BMX	-0.15598	3.11423	0.00270013
ENSG00000075413	MARK3	0.0700035	7.57328	0.0027152
ENSG00000008394	MGST1	0.107516	2.94549	0.00275955
ENSG00000259986	RP11-382A20.4	0.301744	-2.09246	0.00276453
ENSG00000121989	ACVR2A	0.0830017	4.10603	0.00277262
ENSG00000163166	IWS1	-0.0378663	6.38681	0.00277262
ENSG00000100479	POLE2	0.200598	2.29322	0.00281131
ENSG00000121966	CXCR4	-0.0681861	8.61135	0.00281131
ENSG00000138738	PRDM5	-0.180069	3.82172	0.00282474
ENSG00000139514	SLC7A1	0.100774	4.11049	0.00282474
ENSG00000198833	UBE2J1	0.0792093	7.13476	0.00283317
ENSG00000089693	MLF2	-0.0719781	5.4539	0.00285441
ENSG00000186063	AIDA	0.0841247	4.96479	0.00286064
ENSG00000205220	PSMB10	-0.0978709	5.00896	0.00288277
ENSG00000183283	DAZAP2	-0.0486617	8.90008	0.00292466
ENSG00000179104	TMTC2	0.0793339	4.53565	0.00305925
ENSG00000007516	BAIAP3	-0.200802	2.53274	0.00308438
ENSG00000122483	CCDC18	0.0956872	4.26987	0.00308438
ENSG00000112293	GPLD1	0.17943	1.34031	0.00312466
ENSG00000128335	APOL2	-0.0783353	6.88248	0.00312466
ENSG00000136869	TLR4	-0.0741659	9.05647	0.00312466
ENSG00000165304	MELK	0.197302	0.761893	0.00315004
ENSG00000118655	DCLRE1B	0.0689664	3.02182	0.00322186
ENSG00000140396	NCOA2	-0.0461995	8.32379	0.00322186
ENSG00000170515	PA2G4	0.0839612	5.14306	0.00322186
ENSG00000101596	SMCHD1	-0.0813627	10.8764	0.00329166
ENSG00000135525	MAP7	-0.154617	2.248	0.00333503
ENSG00000131759	RARA	-0.0908769	5.89334	0.00334355
ENSG00000229715	EEF1DP3	0.143917	3.11688	0.00334355
ENSG00000132109	TRIM21	-0.0724534	6.25822	0.00338194
ENSG00000162378	ZYG11B	-0.0544654	6.42996	0.00338194
ENSG00000267430	RP11-635N19.2	-0.0710589	3.47885	0.00341957
ENSG00000123094	RASSF8	-0.269298	-1.2385	0.00350202
ENSG00000138346	DNA2	0.10833	3.61864	0.00350202
ENSG00000151702	FLI1	-0.0293879	7.96916	0.00352067
ENSG00000186141	POLR3C	0.0420233	4.82921	0.00355017
ENSG00000233038	AC011899.9	-0.138517	3.39376	0.00355017
ENSG00000106771	TMEM245	0.057999	6.21982	0.00356317
ENSG00000086232	EIF2AK1	0.155214	7.4939	0.00358377
ENSG00000196418	ZNF124	0.0963523	4.0889	0.00360514
ENSG00000010318	PHF7	0.0811863	2.56455	0.0036943
ENSG00000173011	TADA2B	-0.0416018	6.19401	0.0036943
ENSG00000204599	TRIM39	-0.0484078	4.46829	0.0036943
ENSG00000078804	TP53INP2	-0.165757	2.0256	0.00370156
ENSG00000261556	SMG1P7	0.0888078	3.39484	0.00383087
ENSG00000116701	NCF2	-0.0579404	9.99141	0.00383285
ENSG00000038219	BOD1L1	-0.0524196	9.27647	0.0038497
ENSG00000198918	RPL39	0.236707	4.90647	0.00385005
ENSG00000012223	LTF	0.305667	4.19241	0.00385102
ENSG00000123091	RNF11	0.161672	7.11239	0.00391325
ENSG00000107738	C10orf54	-0.0754448	8.96106	0.00392594
ENSG00000169385	RNASE2	0.195425	3.52114	0.00392594
ENSG00000213445	SIPA1	-0.0847033	6.57296	0.00393646
ENSG00000138709	LARP1B	0.0688487	3.8464	0.00396563
ENSG00000188243	COMMD6	0.225811	2.62251	0.00397134
ENSG00000229117	RPL41	0.185899	5.57071	0.00397134
ENSG00000172671	ZFAND4	0.0758453	5.10607	0.00405636
ENSG00000135299	ANKRD6	-0.0742882	3.33054	0.00407368
ENSG00000117450	PRDX1	0.0733441	5.82186	0.00416659
ENSG00000142208	AKT1	-0.0725833	7.03581	0.00416659
ENSG00000154114	TBCEL	0.121557	6.00837	0.00416659
ENSG00000135046	ANXA1	0.134368	7.81534	0.00417349
ENSG00000141968	VAV1	-0.0571551	7.52809	0.00419174
ENSG00000243317	C7orf73	0.120241	5.52854	0.00420855
ENSG00000051523	CYBA	-0.091301	7.08284	0.00431134
ENSG00000116199	FAM20B	0.077331	5.83116	0.00431134
ENSG00000238269	PAGE2B	0.284209	-0.49532	0.00431134
ENSG00000132938	MTUS2	0.294919	-1.32819	0.00438227
ENSG00000168887	C2orf68	-0.0400979	6.06116	0.00441503
ENSG00000149798	CDC42EP2	-0.112423	4.51817	0.00467502
ENSG00000108946	PRKAR1A	-0.0520122	8.5348	0.00469829
ENSG00000276136	RP11-50I19.2	-0.073757	3.8768	0.00470503
ENSG00000100605	ITPK1	-0.0885736	6.62257	0.00479024
ENSG00000068079	IFI35	-0.126398	4.92247	0.00489749
ENSG00000111726	CMAS	0.0954778	4.03937	0.00496776
ENSG00000130764	LRRC47	-0.0470044	4.82485	0.00496776
ENSG00000159339	PADI4	-0.117318	6.06041	0.00496776
ENSG00000163219	ARHGAP25	-0.0467551	8.81913	0.00496776
ENSG00000185000	DGAT1	-0.0720097	4.75135	0.00496776
ENSG00000104870	FCGRT	-0.0802405	7.06448	0.00498995
ENSG00000167395	ZNF646	-0.0662223	6.29625	0.0050747
ENSG00000070413	DGCR2	-0.068224	6.66113	0.00509406
ENSG00000143771	CNIH4	0.0596229	5.2099	0.00511275
ENSG00000119326	CTNNAL1	0.217907	3.32669	0.00513678
ENSG00000131165	CHMP1A	-0.0739095	5.41319	0.00513678
ENSG00000162599	NFIA	0.107536	3.79852	0.00513678
ENSG00000158773	USF1	-0.052927	6.76419	0.005177
ENSG00000110057	UNC93B1	-0.0897646	5.83925	0.00518218
ENSG00000235863	B3GALT4	-0.0711369	4.8593	0.0052009
ENSG00000006125	AP2B1	0.064836	7.74479	0.00525695
ENSG00000071082	RPL31	0.225272	6.20002	0.00525695
ENSG00000084110	HAL	-0.0796711	6.77029	0.00525695
ENSG00000114354	TFG	-0.0440109	5.7233	0.00545518
ENSG00000100380	ST13	0.094347	6.40444	0.00546766
ENSG00000143797	MBOAT2	0.0901259	6.53266	0.00546766
ENSG00000116685	KIAA2013	-0.0639835	5.39996	0.00550615
ENSG00000163931	TKT	-0.0755664	8.87574	0.00550615
ENSG00000262714	RP11-44F14.8	-0.174299	2.99688	0.00550615
ENSG00000172046	USP19	-0.0605289	6.4033	0.00554178
ENSG00000104765	BNIP3L	0.145831	10.1873	0.00558777
ENSG00000059728	MXD1	-0.0781732	9.65107	0.00573019
ENSG00000156482	RPL30	0.144026	8.40277	0.00574093
ENSG00000198917	C9orf114	-0.0631256	4.60405	0.00577752
ENSG00000134419	RPS15A	0.18418	6.43401	0.00581635
ENSG00000139946	PELI2	-0.0664743	6.84932	0.00584989
ENSG00000105321	CCDC9	-0.081382	3.48443	0.00587105
ENSG00000114395	CYB561D2	-0.0609369	3.91369	0.00587105
ENSG00000125691	RPL23	0.210736	6.47993	0.00587105
ENSG00000181061	HIGD1A	0.114246	3.29891	0.00587105
ENSG00000180667	YOD1	0.17217	7.84035	0.0058938
ENSG00000181852	RNF41	-0.0376792	6.3318	0.0058938
ENSG00000163041	H3F3A	-0.0554339	7.49817	0.00589865
ENSG00000204160	ZDHHC18	-0.0763367	7.77348	0.00589865
ENSG00000241839	PLEKHO2	-0.0769613	6.53055	0.00590025
ENSG00000125827	TMX4	-0.0518619	7.86575	0.00590755
ENSG00000130227	XPO7	0.103315	7.32309	0.00590755
ENSG00000139679	LPAR6	0.179574	5.54596	0.00590755
ENSG00000158156	XKR8	-0.0826918	4.36731	0.00590755
ENSG00000170558	CDH2	-0.274069	0.720344	0.00590755
ENSG00000100568	VTI1B	0.0767972	6.82438	0.00592847
ENSG00000188582	PAQR9	0.317976	-0.677819	0.00592847
ENSG00000160888	IER2	-0.0625402	5.94921	0.00596469
ENSG00000161526	SAP30BP	-0.0367911	6.03968	0.00596469
ENSG00000065882	TBC1D1	-0.0521124	7.49128	0.00608508
ENSG00000076513	ANKRD13A	-0.0395653	8.41245	0.00608508
ENSG00000114268	PFKFB4	-0.0772839	6.35063	0.00608508
ENSG00000234332	BCAS2P2	0.244154	-0.824055	0.00608508
ENSG00000185278	ZBTB37	-0.0497389	8.0594	0.00609387
ENSG00000119950	MXI1	0.18004	8.07174	0.00613472
ENSG00000144320	KIAA1715	0.0670505	5.66096	0.00613472
ENSG00000162889	MAPKAPK2	-0.0609374	6.35718	0.00613472
ENSG00000163554	SPTA1	0.210597	4.28149	0.00613472
ENSG00000179456	ZBTB18	-0.0421693	6.84667	0.00613472
ENSG00000186314	PRELID2	0.141849	1.19806	0.00613472
ENSG00000184983	NDUFA6	0.107763	3.581	0.00619628
ENSG00000204525	HLA-C	-0.0934236	10.7619	0.00619628
ENSG00000135709	KIAA0513	-0.0710658	7.11698	0.00620341
ENSG00000251442	LINC01094	0.130978	2.34578	0.00620341
ENSG00000100056	DGCR14	-0.0637181	4.17687	0.00622879
ENSG00000083444	PLOD1	-0.0934577	5.19314	0.00626225
ENSG00000126787	DLGAP5	0.1961	1.00695	0.00626337
ENSG00000010803	SCMH1	0.0581706	4.09685	0.00626537
ENSG00000126391	FRMD8	-0.0700169	5.13501	0.00627779
ENSG00000260190	RP11-229P13.25	-0.214904	-1.02182	0.00628004
ENSG00000134996	OSTF1	-0.0441293	7.36107	0.0063928
ENSG00000140854	KATNB1	-0.0800544	3.21818	0.0063928
ENSG00000101928	MOSPD1	0.104548	3.42318	0.00646926
ENSG00000118193	KIF14	0.162679	2.20267	0.00646926
ENSG00000109654	TRIM2	0.126478	2.86498	0.00649404
ENSG00000145425	RPS3A	0.24814	6.55245	0.00651439
ENSG00000185825	BCAP31	-0.0564881	5.96873	0.00651439
ENSG00000114737	CISH	0.0966476	5.22094	0.00662304
ENSG00000111666	CHPT1	0.124755	6.02838	0.00664469
ENSG00000115602	IL1RL1	-0.159481	3.73988	0.00671521
ENSG00000165178	NCF1C	-0.120876	5.20341	0.00671521
ENSG00000109189	USP46	0.0857301	4.0771	0.00673846
ENSG00000198237	RP11-98J23.2	0.196137	-0.528287	0.00674951
ENSG00000066279	ASPM	0.14327	2.86807	0.00681311
ENSG00000103342	GSPT1	0.160601	9.00139	0.00681769
ENSG00000136279	DBNL	-0.0549757	8.45407	0.00685542
ENSG00000182512	GLRX5	0.198103	6.8623	0.00686628
ENSG00000197442	MAP3K5	-0.0421485	7.86234	0.00692637
ENSG00000096006	CRISP3	0.273807	2.03543	0.00696618
ENSG00000182774	RPS17	0.192649	6.47934	0.00696618
ENSG00000197872	FAM49A	-0.0485514	7.48233	0.00696618
ENSG00000131446	MGAT1	-0.056848	7.34449	0.00698242
ENSG00000132155	RAF1	-0.0435822	8.32597	0.00698242
ENSG00000173598	NUDT4	0.10135	5.92256	0.00698242
ENSG00000111269	CREBL2	0.0517006	6.16289	0.0070303
ENSG00000106829	TLE4	-0.0404521	7.37755	0.00703965
ENSG00000258819	RP11-7F17.3	-0.181811	4.02125	0.00703965
ENSG00000118816	CCNI	0.103913	7.88079	0.00704218
ENSG00000143384	MCL1	-0.0565403	10.8665	0.00707598
ENSG00000101474	APMAP	-0.0733081	7.53099	0.00708323
ENSG00000161921	CXCL16	-0.116699	4.11836	0.00708323
ENSG00000143162	CREG1	0.115745	6.27815	0.0071116
ENSG00000106636	YKT6	-0.0375638	5.60548	0.00713751
ENSG00000110090	CPT1A	0.113097	5.90846	0.00713751
ENSG00000066926	FECH	0.217446	7.52155	0.00714106
ENSG00000011600	TYROBP	-0.0733545	7.65771	0.00715981
ENSG00000132475	H3F3B	-0.0581431	9.53015	0.00715981
ENSG00000151491	EPS8	0.138044	1.49293	0.00715981
ENSG00000197721	CR1L	0.189411	3.84945	0.00715981
ENSG00000144655	CSRNP1	-0.0928339	5.17814	0.0073048
ENSG00000125753	VASP	-0.0715968	8.23313	0.00731915
ENSG00000196843	ARID5A	-0.0773037	4.80445	0.00735426
ENSG00000124126	PREX1	-0.0771111	9.30451	0.00736685
ENSG00000182899	RPL35A	0.146692	6.76498	0.00738947
ENSG00000043093	DCUN1D1	0.0929845	6.71377	0.00741538
ENSG00000204257	HLA-DMA	-0.0643489	5.89617	0.00741538
ENSG00000237499	RP11-356I2.4	-0.0897262	3.19962	0.00741538
ENSG00000008294	SPAG9	-0.0413446	8.17808	0.00757376
ENSG00000068878	PSME4	0.0715266	7.39468	0.0076293
ENSG00000182487	NCF1B	-0.107623	5.40047	0.0076293
ENSG00000156675	RAB11FIP1	-0.0700761	8.71971	0.00764091
ENSG00000160570	DEDD2	-0.0625701	6.21091	0.00764091
ENSG00000196436	NPIPB15	0.335745	-1.05013	0.00764091
ENSG00000279491	RP11-810P12.7	-0.0844943	2.22846	0.00764091
ENSG00000060237	WNK1	0.120459	8.79279	0.00764569
ENSG00000075239	ACAT1	0.0984978	3.47185	0.00777983
ENSG00000092330	TINF2	-0.040452	6.69591	0.0077821
ENSG00000160991	ORAI2	-0.0828814	6.86442	0.0078873
ENSG00000169403	PTAFR	-0.0761599	8.47052	0.0078873
ENSG00000153046	CDYL	0.104012	5.8144	0.00789377
ENSG00000167283	ATP5L	0.0889744	5.42429	0.00789377
ENSG00000157193	LRP8	0.0576588	3.84704	0.00793612
ENSG00000183625	CCR3	-0.144482	5.45538	0.00793612
ENSG00000196411	EPHB4	-0.136552	3.40321	0.00793612
ENSG00000122694	GLIPR2	-0.0545406	7.36827	0.00807209
ENSG00000122966	CIT	0.11387	1.59132	0.00813171
ENSG00000146063	TRIM41	-0.0431982	4.88683	0.00813171
ENSG00000142676	RPL11	0.148152	7.70806	0.00820741
ENSG00000111886	GABRR2	0.150822	1.2294	0.00824475
ENSG00000168234	TTC39C	0.0628009	6.10373	0.00831911
ENSG00000204227	RING1	-0.0530026	4.16695	0.00853937
ENSG00000162517	PEF1	-0.0481474	5.31935	0.00854024
ENSG00000274370	AC144831.3	-0.133101	1.54729	0.00865307
ENSG00000138821	SLC39A8	0.0732351	4.60909	0.00870469
ENSG00000185507	IRF7	-0.133659	4.83329	0.00878066
ENSG00000164078	MST1R	0.234301	-1.97605	0.00905431
ENSG00000151136	BTBD11	-0.0956481	4.13389	0.00912526
ENSG00000141076	CIRH1A	0.05259	3.63873	0.00912822
ENSG00000166523	CLEC4E	-0.0997474	6.30041	0.00921185
ENSG00000177191	B3GNT8	-0.109392	3.87112	0.00921185
ENSG00000148346	LCN2	0.240266	2.85554	0.00927652
ENSG00000034713	GABARAPL2	0.109608	6.57131	0.00934844
ENSG00000196352	CD55	-0.0703908	7.97143	0.00946656
ENSG00000214960	ISPD	0.144568	1.66937	0.00946656
ENSG00000148297	MED22	-0.0546247	5.62017	0.00947918
ENSG00000115042	FAHD2A	0.0592714	3.20206	0.0095208
ENSG00000116809	ZBTB17	-0.0629292	4.44155	0.00955093
ENSG00000138778	CENPE	0.132664	2.5962	0.00955093
ENSG00000139722	VPS37B	-0.0680508	4.85793	0.00955093
ENSG00000158966	CACHD1	-0.22817	0.22684	0.00956603
ENSG00000136932	C9orf156	-0.0401644	5.69324	0.00961288
ENSG00000197976	AKAP17A	-0.0535487	6.27431	0.00963866
ENSG00000141580	WDR45B	-0.0340682	5.55206	0.00969166
ENSG00000240065	PSMB9	-0.073808	7.09571	0.00970105
ENSG00000110911	SLC11A2	0.045853	5.43445	0.00971854
ENSG00000164258	NDUFS4	0.102847	2.82029	0.00971854
ENSG00000150977	RILPL2	-0.0509924	6.12004	0.00975213
ENSG00000217027	TPT1P4	0.28013	-1.6546	0.00975213
ENSG00000149932	TMEM219	-0.0517456	4.74988	0.00976681
ENSG00000112218	GPR63	0.195304	0.23607	0.00977267
ENSG00000118402	ELOVL4	0.187355	0.552272	0.00981643
ENSG00000148719	DNAJB12	-0.0503392	5.748	0.00981643
ENSG00000149269	PAK1	-0.0568222	7.61267	0.00981643
ENSG00000153093	ACOXL	-0.201906	-0.199527	0.00981643
ENSG00000132906	CASP9	-0.0683505	3.98794	0.00981793
ENSG00000169567	HINT1	0.135653	4.62941	0.00989572
ENSG00000100342	APOL1	-0.103889	4.85583	0.00991628
ENSG00000123106	CCDC91	0.0616773	5.45702	0.00996699
ENSG00000146834	MEPCE	-0.0547941	5.13004	0.00998724
ENSG00000175489	LRRC25	-0.0817575	6.55764	0.0100548
ENSG00000141582	CBX4	-0.0556314	4.17259	0.0102401
ENSG00000166579	NDEL1	-0.0558951	7.68662	0.0103207
ENSG00000165775	FUNDC2	0.0878929	5.10943	0.0103455
ENSG00000013374	NUB1	-0.0502122	6.58676	0.0103763
ENSG00000173409	ARV1	0.0859159	2.6292	0.0103763
ENSG00000092010	PSME1	-0.0594983	7.8242	0.0103834
ENSG00000100084	HIRA	-0.0644266	3.45597	0.0103834
ENSG00000137449	CPEB2	-0.0654907	5.80111	0.0103834
ENSG00000197965	MPZL1	-0.115837	6.5892	0.0104782
ENSG00000171940	ZNF217	-0.0343722	8.64494	0.0106667
ENSG00000186187	ZNRF1	0.0838701	2.39889	0.0106699
ENSG00000132024	CC2D1A	0.0997841	1.82676	0.0107726
ENSG00000125835	SNRPB	-0.05553	5.12838	0.0108789
ENSG00000142046	TMEM91	-0.0811526	3.93033	0.0109019
ENSG00000162923	WDR26	0.0722709	8.24417	0.0110199
ENSG00000103248	MTHFSD	-0.0411145	4.6218	0.0110603
ENSG00000008226	DLEC1	0.0957858	2.57818	0.0110722
ENSG00000125910	S1PR4	-0.0949685	6.49899	0.0111639
ENSG00000136875	PRPF4	-0.0433102	4.93968	0.0111639
ENSG00000160712	IL6R	-0.0544187	8.92432	0.0111639
ENSG00000170298	LGALS9B	-0.291706	-1.3981	0.0111639
ENSG00000264745	TTC39C-AS1	0.195884	0.0683305	0.0111639
ENSG00000234709	UPF3AP3	-0.0924679	1.68327	0.0112307
ENSG00000204389	HSPA1A	-0.0972571	5.49384	0.0112867
ENSG00000112576	CCND3	-0.059163	7.5609	0.0114339
ENSG00000147454	SLC25A37	0.113009	11.2946	0.0114444
ENSG00000185201	IFITM2	-0.107104	8.89262	0.0114444
ENSG00000206503	HLA-A	-0.103719	10.4624	0.0114444
ENSG00000080854	IGSF9B	0.142317	1.94412	0.0114745
ENSG00000083857	FAT1	0.266746	1.23591	0.0114745
ENSG00000109475	RPL34	0.213488	5.42032	0.011508
ENSG00000203497	PDCD4-AS1	-0.104488	2.14883	0.011508
ENSG00000138326	RPS24	0.161561	6.59616	0.0115375
ENSG00000136810	TXN	0.0939444	4.60191	0.0115744
ENSG00000147604	RPL7	0.225416	6.30086	0.0115744
ENSG00000065328	MCM10	0.197765	0.105805	0.0116413
ENSG00000120158	RCL1	0.083631	4.45581	0.0116413
ENSG00000160703	NLRX1	-0.0847816	3.95038	0.0116413
ENSG00000196683	TOMM7	0.159986	4.58135	0.0116413
ENSG00000135070	ISCA1	0.125854	5.86554	0.0118464
ENSG00000141034	GID4	0.115366	4.43297	0.0118464
ENSG00000148175	STOM	0.105799	7.63806	0.0118464
ENSG00000159592	GPBP1L1	0.0354834	6.86627	0.0118464
ENSG00000171863	RPS7	0.193034	5.973	0.0118464
ENSG00000221869	CEBPD	-0.0877936	5.95006	0.0118464
ENSG00000277791	PSMB3	-0.0595375	6.45719	0.0118464
ENSG00000157514	TSC22D3	-0.0762749	8.36105	0.0119264
ENSG00000273841	TAF9	0.0812029	4.00168	0.0119559
ENSG00000165629	ATP5C1	0.0978995	5.59162	0.0119571
ENSG00000184445	KNTC1	0.0450913	5.58305	0.0122037
ENSG00000248774	RP11-798M19.3	-0.106754	1.96026	0.0122523
ENSG00000265354	TIMM23	0.0549818	4.27994	0.0122839
ENSG00000026508	CD44	0.0570133	8.53466	0.012317
ENSG00000151490	PTPRO	0.0862057	4.26055	0.0124471
ENSG00000083223	ZCCHC6	-0.0443311	8.93082	0.0125039
ENSG00000080815	PSEN1	-0.0332957	7.74443	0.0125042
ENSG00000092841	MYL6	0.102115	7.87442	0.0125042
ENSG00000100632	ERH	0.107436	4.13426	0.0125042
ENSG00000109381	ELF2	-0.0323285	7.32846	0.0125042
ENSG00000109685	WHSC1	0.0511585	5.88863	0.0125042
ENSG00000111144	LTA4H	0.080509	8.29978	0.0125042
ENSG00000169877	AHSP	0.260589	4.94205	0.0125042
ENSG00000172215	CXCR6	-0.15879	3.40185	0.0125042
ENSG00000172331	BPGM	0.204532	7.29694	0.0125042
ENSG00000174500	GCSAM	0.0840051	4.48514	0.0125042
ENSG00000105617	LENG1	-0.0680797	3.14636	0.0125863
ENSG00000110693	SOX6	0.170825	5.26117	0.0125863
ENSG00000163221	S100A12	0.15305	5.88465	0.0125863
ENSG00000182872	RBM10	-0.0576961	5.40449	0.0125863
ENSG00000253677	UBE2HP1	0.251332	-2.27307	0.0125863
ENSG00000153814	JAZF1	0.127111	5.35651	0.0126428
ENSG00000275700	AATF	-0.0395179	5.90703	0.0128634
ENSG00000117362	APH1A	-0.0510476	6.63732	0.0128638
ENSG00000099725	PRKY	0.0771724	1.59325	0.0129218
ENSG00000128656	CHN1	0.150482	1.42309	0.0129218
ENSG00000023892	DEF6	-0.0521038	7.01572	0.0129387
ENSG00000102882	MAPK3	-0.0789767	5.22621	0.0130168
ENSG00000168785	TSPAN5	0.173642	7.07747	0.0130168
ENSG00000261804	RP11-44F14.2	-0.149543	3.38465	0.0130501
ENSG00000163755	HPS3	-0.0347208	6.31027	0.0130966
ENSG00000169223	LMAN2	-0.0603452	6.19635	0.0130966
ENSG00000170540	ARL6IP1	0.0697436	6.86066	0.0130966
ENSG00000172775	FAM192A	-0.0268312	6.63433	0.0130966
ENSG00000137815	RTF1	-0.0390409	5.82535	0.0130968
ENSG00000196872	KIAA1211L	-0.140926	1.07558	0.0131232
ENSG00000156467	UQCRB	0.119778	4.78031	0.0131244
ENSG00000234129	RP11-120D5.1	0.154265	0.617207	0.0131244
ENSG00000198805	PNP	0.0874118	6.21878	0.0131555
ENSG00000052802	MSMO1	0.0785886	3.81508	0.0131562
ENSG00000130589	HELZ2	-0.117033	6.26557	0.0131562
ENSG00000091129	NRCAM	-0.266032	0.319701	0.0131626
ENSG00000156787	TBC1D31	0.0691813	5.41519	0.013246
ENSG00000135148	TRAFD1	-0.0582026	6.38388	0.0132914
ENSG00000117676	RPS6KA1	-0.0545041	7.97014	0.0133117
ENSG00000101082	SLA2	-0.0677511	5.35864	0.0133643
ENSG00000137824	RMDN3	0.0529203	4.12694	0.0133643
ENSG00000143374	TARS2	-0.0467152	3.99522	0.0133643
ENSG00000150867	PIP4K2A	0.111545	9.19682	0.0133643
ENSG00000167977	KCTD5	-0.0457522	4.8202	0.0133643
ENSG00000187994	RINL	-0.0475119	4.94478	0.0134607
ENSG00000130724	CHMP2A	-0.068888	5.83622	0.0134755
ENSG00000201076	RNU4-51P	-0.224413	-1.91102	0.0134755
ENSG00000111261	MANSC1	-0.103518	5.03888	0.0135409
ENSG00000116337	AMPD2	-0.0829751	7.07487	0.0135409
ENSG00000181704	YIPF6	0.0685753	5.84336	0.0135409
ENSG00000229056	AC020571.3	0.177785	0.927836	0.0135409
ENSG00000198736	MSRB1	-0.0816506	7.2372	0.0135693
ENSG00000130303	BST2	-0.0842275	5.2948	0.0136818
ENSG00000143727	ACP1	0.0763163	6.07288	0.0136818
ENSG00000013561	RNF14	0.100645	6.42821	0.0136964
ENSG00000143545	RAB13	0.161257	0.550307	0.0136964
ENSG00000186529	CYP4F3	-0.0992198	7.25852	0.0136964
ENSG00000120265	PCMT1	0.0632926	5.59075	0.0138789
ENSG00000122026	RPL21	0.176193	6.65808	0.0139431
ENSG00000179921	GPBAR1	-0.0905855	3.28638	0.0140073
ENSG00000120690	ELF1	-0.0308019	8.1583	0.0140597
ENSG00000124256	ZBP1	-0.101736	5.83136	0.0140643
ENSG00000167768	KRT1	0.264943	5.56606	0.0140686
ENSG00000241553	ARPC4	-0.0481735	6.97072	0.0140686
ENSG00000162961	DPY30	0.0910207	2.91191	0.0142409
ENSG00000168913	ENHO	-0.208794	-0.396135	0.0142409
ENSG00000066084	DIP2B	-0.045451	7.99106	0.0143746
ENSG00000117036	ETV3	-0.0292236	5.98728	0.0143746
ENSG00000164463	CREBRF	-0.0425449	8.17391	0.0143746
ENSG00000243064	ABCC13	0.209936	3.31861	0.0143746
ENSG00000104518	GSDMD	-0.0755391	5.93359	0.0144222
ENSG00000205155	PSENEN	-0.0723223	3.76123	0.0145783
ENSG00000267519	CTD-3252C9.4	-0.085495	4.31849	0.0145965
ENSG00000101265	RASSF2	-0.0537152	10.0854	0.0147159
ENSG00000103194	USP10	-0.0486714	6.84515	0.014741
ENSG00000078403	MLLT10	0.0391131	5.83334	0.0147861
ENSG00000173166	RAPH1	0.125227	2.63794	0.0147909
ENSG00000131355	EMR3	-0.0738013	6.96208	0.0148222
ENSG00000160710	ADAR	-0.0653231	9.55615	0.014906
ENSG00000261614	CSDAP1	0.340676	-0.475872	0.0149944
ENSG00000201772	SNORA5C	-0.127786	2.65559	0.0150197
ENSG00000076770	MBNL3	0.154015	8.68422	0.0151555
ENSG00000165025	SYK	-0.05085	8.50551	0.0151555
ENSG00000204681	GABBR1	0.110592	4.15285	0.0152808
ENSG00000119559	C19orf25	-0.0680228	4.70992	0.0152824
ENSG00000217416	ISCA1P1	0.303893	-1.38907	0.0152824
ENSG00000133606	MKRN1	0.143136	10.2505	0.0153071
ENSG00000124882	EREG	-0.24708	0.373624	0.0153259
ENSG00000119541	VPS4B	-0.0364792	7.1014	0.0153734
ENSG00000183111	ARHGEF37	0.203177	1.85924	0.0153925
ENSG00000113269	RNF130	-0.043917	7.91698	0.0154764
ENSG00000153317	ASAP1	0.0888281	6.89882	0.0155494
ENSG00000146007	ZMAT2	0.0975988	6.55486	0.0155567
ENSG00000273473	LL09NC01-139C3.1	-0.222019	-1.3549	0.0156606
ENSG00000006576	PHTF2	0.0574709	5.93394	0.0157514
ENSG00000257878	RP11-256L6.3	-0.110224	3.63789	0.0157568
ENSG00000123636	BAZ2B	-0.0617022	8.72095	0.0157872
ENSG00000279236	RP11-120K19.3	-0.122639	3.00229	0.0157959
ENSG00000124541	RRP36	-0.0382757	4.84706	0.0158279
ENSG00000092098	RNF31	-0.0615038	4.7347	0.0158547
ENSG00000136999	NOV	-0.144603	3.79993	0.0158871
ENSG00000257674	RP11-76E16.2	0.23485	-2.58167	0.0159594
ENSG00000131944	C19orf40	-0.119435	1.50941	0.0160583
ENSG00000102032	RENBP	-0.0781733	3.36071	0.0160999
ENSG00000131459	GFPT2	-0.302515	-1.4395	0.0160999
ENSG00000078124	ACER3	0.0546083	5.25417	0.016151
ENSG00000141574	SECTM1	-0.0970762	6.13084	0.016151
ENSG00000168040	FADD	-0.0539918	4.88335	0.016159
ENSG00000169902	TPST1	-0.148989	3.83762	0.0161918
ENSG00000119682	AREL1	-0.0381345	7.43903	0.016336
ENSG00000135114	OASL	-0.179934	5.13649	0.0163392
ENSG00000172349	IL16	-0.0479655	9.41574	0.0163392
ENSG00000204560	DHX16	-0.0436138	5.98582	0.0163392
ENSG00000273035	RP11-449G16.1	-0.221818	-1.6074	0.0163392
ENSG00000102572	STK24	-0.0329586	7.41934	0.0164322
ENSG00000102100	SLC35A2	-0.0625337	3.18055	0.0164564
ENSG00000175348	TMEM9B	0.0573335	5.56685	0.0164564
ENSG00000183508	FAM46C	0.192253	10.1964	0.0164564
ENSG00000115165	CYTIP	-0.0305108	8.54385	0.0164984
ENSG00000220842	RP11-572P18.1	0.308264	-0.555589	0.0165873
ENSG00000010704	HFE	0.0722466	2.96983	0.0167399
ENSG00000100994	PYGB	-0.0689933	5.50508	0.0167928
ENSG00000145545	SRD5A1	0.0583682	4.38004	0.0168513
ENSG00000133943	C14orf159	-0.060468	7.49179	0.0169409
ENSG00000101181	MTG2	-0.0572641	4.33184	0.0169529
ENSG00000124356	STAMBP	-0.0318961	5.64437	0.0169529
ENSG00000143476	DTL	0.14455	1.37907	0.0169529
ENSG00000155256	ZFYVE27	-0.0430933	5.71032	0.0169529
ENSG00000185909	KLHDC8B	-0.129439	3.15217	0.016989
ENSG00000021645	NRXN3	0.259921	0.858276	0.0170599
ENSG00000198908	BHLHB9	-0.0878518	1.65825	0.0170818
ENSG00000088986	DYNLL1	0.0628233	5.36227	0.0170965
ENSG00000121892	PDS5A	0.0358367	7.46833	0.0170965
ENSG00000189319	FAM53B	-0.0545331	6.62056	0.0170965
ENSG00000114745	GORASP1	-0.0443839	4.84492	0.0171196
ENSG00000176208	ATAD5	0.071259	3.61533	0.0171196
ENSG00000155099	TMEM55A	-0.0537192	5.95444	0.017133
ENSG00000064419	TNPO3	-0.0304592	6.85538	0.0171748
ENSG00000119640	ACYP1	0.0862053	2.10556	0.0171748
ENSG00000110047	EHD1	-0.0635773	6.93224	0.017246
ENSG00000224550	RP11-270C12.3	0.223372	-2.69106	0.017246
ENSG00000168016	TRANK1	-0.0685843	8.99025	0.0172984
ENSG00000139517	LNX2	0.0560699	4.40501	0.0173037
ENSG00000155093	PTPRN2	-0.130137	2.82265	0.017472
ENSG00000060069	CTDP1	-0.0477542	5.93282	0.0175102
ENSG00000171606	ZNF274	-0.0423533	6.0133	0.0175102
ENSG00000188761	BCL2L15	0.124249	1.11966	0.0175102
ENSG00000137161	CNPY3	-0.053422	6.25119	0.0175161
ENSG00000165029	ABCA1	-0.126633	7.21785	0.0175161
ENSG00000183691	NOG	-0.210498	1.27154	0.0175161
ENSG00000136490	LIMD2	-0.0685435	7.91808	0.0175511
ENSG00000168874	ATOH8	-0.313266	0.0472231	0.0175889
ENSG00000131188	PRR7	-0.102366	1.14186	0.01762
ENSG00000144579	CTDSP1	-0.0599201	6.2787	0.0176385
ENSG00000076356	PLXNA2	-0.106869	3.50672	0.0176629
ENSG00000140987	ZSCAN32	-0.030805	5.03363	0.0178094
ENSG00000150540	HNMT	0.0933118	3.98207	0.0179065
ENSG00000223609	HBD	0.313944	-1.13671	0.0179065
ENSG00000135392	DNAJC14	-0.0398072	4.98257	0.0179527
ENSG00000141127	PRPSAP2	0.0434207	5.1274	0.0179527
ENSG00000196914	ARHGEF12	0.145866	7.46842	0.0180187
ENSG00000184661	CDCA2	0.187258	-0.0369942	0.0182133
ENSG00000177352	CCDC71	-0.0593379	4.0962	0.0182189
ENSG00000108578	BLMH	0.0447657	4.56986	0.0182434
ENSG00000114353	GNAI2	-0.0539766	8.15192	0.0182434
ENSG00000176390	CRLF3	-0.0354761	7.46409	0.0182434
ENSG00000179869	ABCA13	0.229018	3.47014	0.0182434
ENSG00000112096	SOD2	-0.0737785	10.8827	0.0182778
ENSG00000147669	POLR2K	0.167381	2.60731	0.0182778
ENSG00000171735	CAMTA1	0.0576111	3.79806	0.0182778
ENSG00000181788	SIAH2	0.164751	7.1248	0.0182778
ENSG00000198933	TBKBP1	-0.107135	3.22161	0.0182778
ENSG00000099968	BCL2L13	0.0685319	5.95511	0.0183337
ENSG00000140403	DNAJA4	0.134482	5.17254	0.0184053
ENSG00000232810	TNF	0.0870777	2.17624	0.0184735
ENSG00000129472	RAB2B	0.15167	6.88603	0.0184825
ENSG00000154589	LY96	0.110582	3.50913	0.0185246
ENSG00000171320	ESCO2	0.159489	0.243886	0.0185246
ENSG00000006327	TNFRSF12A	-0.104005	1.68967	0.0185816
ENSG00000085231	TAF9	0.129785	1.24057	0.0185816
ENSG00000136026	CKAP4	-0.0717183	5.74013	0.0185816
ENSG00000107281	NPDC1	0.149723	1.86424	0.0186144
ENSG00000123836	PFKFB2	-0.0792275	4.99395	0.0186144
ENSG00000063978	RNF4	-0.0292717	6.70015	0.0187198
ENSG00000163827	LRRC2	0.244132	-0.423289	0.018776
ENSG00000182511	FES	-0.0773115	6.29031	0.018776
ENSG00000148773	MKI67	0.132938	4.38183	0.0187865
ENSG00000143365	RORC	0.148694	1.95025	0.0189709
ENSG00000168826	ZBTB49	-0.045518	4.174	0.018999
ENSG00000168071	CCDC88B	-0.0781091	6.81983	0.0190588
ENSG00000165355	FBXO33	-0.0385082	5.93105	0.0191724
ENSG00000119392	GLE1	-0.0338679	5.92997	0.0191885
ENSG00000135828	RNASEL	-0.0374805	6.74522	0.0192231
ENSG00000067596	DHX8	-0.038261	7.07419	0.0192423
ENSG00000204590	GNL1	-0.041381	4.93331	0.0192553
ENSG00000203780	FANK1	0.171795	0.155204	0.0193248
ENSG00000261115	TMEM178B	0.245196	-0.681156	0.0193248
ENSG00000178996	SNX18	-0.050411	7.28872	0.019362
ENSG00000093134	VNN3	-0.0939699	6.75819	0.0194055
ENSG00000175467	SART1	-0.0675616	5.50467	0.0194055
ENSG00000204304	PBX2	-0.0537262	6.59819	0.0194055
ENSG00000131981	LGALS3	0.132369	6.08917	0.0197073
ENSG00000177954	RPS27	0.203263	7.08732	0.0199027
ENSG00000185669	SNAI3	-0.0830198	3.14946	0.0199176
ENSG00000229222	KRT18P4	-0.0924775	1.41494	0.0200416
ENSG00000244716	RP11-20O24.4	0.311029	-1.52222	0.0200416
ENSG00000255801	RP11-561P12.5	-0.149277	3.53312	0.0200663
ENSG00000087301	TXNDC16	0.0669636	4.77499	0.0200973
ENSG00000111206	FOXM1	0.209765	-0.67173	0.0200973
ENSG00000113615	SEC24A	0.0459519	4.90071	0.0200973
ENSG00000141570	CBX8	-0.0920191	1.94486	0.0200973
ENSG00000204439	C6orf47	-0.0436967	5.44422	0.0200973
ENSG00000169442	CD52	0.14034	6.77241	0.0200993
ENSG00000271382	RP11-1060G2.2	0.227213	-2.31948	0.0200993
ENSG00000038427	VCAN	0.0832258	10.4041	0.0201676
ENSG00000163682	RPL9	0.200999	6.37315	0.0201902
ENSG00000055208	TAB2	0.0339029	7.54015	0.0202103
ENSG00000175581	MRPL48	0.0859576	3.03559	0.0203153
ENSG00000125735	TNFSF14	-0.056444	5.9816	0.0203432
ENSG00000177105	RHOG	-0.0703458	6.13469	0.0203432
ENSG00000112473	SLC39A7	-0.046025	5.06891	0.0205976
ENSG00000155368	DBI	0.0951171	4.05385	0.0205976
ENSG00000134463	ECHDC3	-0.14144	1.84384	0.0207866
ENSG00000172725	CORO1B	-0.0650412	5.01093	0.0207866
ENSG00000121680	PEX16	-0.0575343	4.5158	0.0208446
ENSG00000090316	MAEA	-0.0464608	6.01989	0.0208522
ENSG00000065491	TBC1D22B	0.117456	5.02197	0.0209229
ENSG00000100106	TRIOBP	-0.0595573	5.46814	0.0209428
ENSG00000186638	KIF24	0.114116	1.19919	0.0209693
ENSG00000213757	CTC-451P13.1	0.257947	-2.20699	0.0216183
ENSG00000125505	MBOAT7	-0.0785776	6.64961	0.02169
ENSG00000124214	STAU1	0.0739357	5.95028	0.0217747
ENSG00000159556	ISL2	-0.168397	0.910471	0.0217747
ENSG00000231682	AC097713.4	-0.125496	1.77045	0.0217937
ENSG00000135045	C9orf40	0.105433	2.53414	0.0219475
ENSG00000128594	LRRC4	-0.0803938	5.83399	0.0219993
ENSG00000259056	DUXAP1	-0.248325	-1.97474	0.0220324
ENSG00000004660	CAMKK1	-0.0874303	3.78398	0.0220413
ENSG00000114209	PDCD10	0.0719033	5.58048	0.0220413
ENSG00000122376	FAM35A	0.0787839	4.80941	0.0220413
ENSG00000198818	SFT2D1	-0.0423503	5.26265	0.0220413
ENSG00000168280	KIF5C	0.0876019	3.59637	0.0221016
ENSG00000071127	WDR1	-0.0435067	8.493	0.0221694
ENSG00000214999	AC129492.6	-0.134478	0.264366	0.0221996
ENSG00000018280	SLC11A1	-0.0796434	7.9204	0.0223093
ENSG00000099860	GADD45B	-0.0686745	4.87116	0.0223093
ENSG00000145214	DGKQ	-0.0952597	4.46478	0.0223093
ENSG00000198270	TMEM116	0.0547601	4.5181	0.0223093
ENSG00000078747	ITCH	-0.0300726	7.84727	0.0223433
ENSG00000280135	RP1-47M23.3	0.0681887	3.3807	0.0223433
ENSG00000123080	CDKN2C	0.107074	1.76275	0.022357
ENSG00000162496	DHRS3	-0.0742863	3.83192	0.022357
ENSG00000197943	PLCG2	-0.0475386	8.07862	0.022357
ENSG00000225632	RP5-997D24.3	-0.247536	-1.26368	0.0223694
ENSG00000211813	TRAV34	0.229111	-1.5752	0.0224623
ENSG00000249859	PVT1	0.0829108	4.13305	0.02273
ENSG00000067248	DHX29	0.0491921	5.48936	0.0227927
ENSG00000141448	GATA6	-0.252226	-2.10869	0.0228275
ENSG00000180448	HMHA1	-0.070561	8.30436	0.0228986
ENSG00000268119	CTD-2561J22.5	0.251631	0.779025	0.0229242
ENSG00000178789	CD300LB	-0.0718399	5.40507	0.023043
ENSG00000118900	UBN1	-0.072137	7.21836	0.0231814
ENSG00000114391	RPL24	0.110799	6.62256	0.0233567
ENSG00000130706	ADRM1	-0.0633728	4.4049	0.0234517
ENSG00000270025	BMS1P7	0.247668	-1.58357	0.023594
ENSG00000188175	HEPACAM2	0.216079	1.35187	0.0236764
ENSG00000092200	RPGRIP1	-0.102494	3.42489	0.0237785
ENSG00000111790	FGFR1OP2	0.060994	6.6576	0.0237785
ENSG00000169019	COMMD8	0.147064	2.81723	0.0237785
ENSG00000023902	PLEKHO1	-0.0434107	7.10764	0.0238446
ENSG00000065615	CYB5R4	-0.0368592	7.57554	0.0238446
ENSG00000180901	KCTD2	-0.0442219	5.16403	0.0238446
ENSG00000106701	FSD1L	0.0823321	3.13888	0.0239611
ENSG00000128609	NDUFA5	0.0876487	3.84432	0.0239611
ENSG00000269743	SLC25A53	-0.0533832	3.99711	0.024165
ENSG00000083896	YTHDC1	-0.038147	7.40007	0.0241833
ENSG00000137331	IER3	-0.106185	2.65246	0.0241833
ENSG00000095787	WAC	0.0217219	8.09437	0.0243687
ENSG00000117091	CD48	0.0841908	7.76994	0.0243687
ENSG00000136867	SLC31A2	-0.0687215	6.90097	0.0244272
ENSG00000124243	BCAS4	-0.0705778	3.74928	0.0244328
ENSG00000103196	CRISPLD2	-0.107843	6.91577	0.0246013
ENSG00000182481	KPNA2	0.0754901	2.39087	0.0246681
ENSG00000136827	TOR1A	-0.0340614	5.33585	0.0247083
ENSG00000143119	CD53	-0.0262242	9.14246	0.0247165
ENSG00000147416	ATP6V1B2	-0.0437919	9.09606	0.0247427
ENSG00000095951	HIVEP1	-0.0407209	6.98121	0.0247504
ENSG00000267750	RUNDC3A-AS1	0.220818	-0.31104	0.0249371
ENSG00000163162	RNF149	-0.0408019	9.23107	0.0249523
ENSG00000228903	RASA4CP	-0.102879	1.42599	0.0249523
ENSG00000108604	SMARCD2	-0.0478288	6.5892	0.0249732
ENSG00000163481	RNF25	-0.05154	3.51276	0.0249866
ENSG00000162722	TRIM58	0.202111	7.78107	0.0249907
ENSG00000184743	ATL3	0.0372809	6.34092	0.0249907
ENSG00000279483	RPL41	0.245141	-1.49769	0.0251421
ENSG00000196455	PIK3R4	-0.0286692	6.30409	0.0251633
ENSG00000141543	EIF4A3	-0.0467455	5.47458	0.0251836
ENSG00000136280	CCM2	-0.0406074	6.98317	0.0252588
ENSG00000256361	RP11-613F22.6	-0.105599	0.992989	0.0253485
ENSG00000112290	WASF1	0.17335	-0.185773	0.0254078
ENSG00000161970	RPL26	0.186018	4.66476	0.0255551
ENSG00000181192	DHTKD1	-0.0404996	5.94579	0.0255551
ENSG00000204386	NEU1	-0.0499605	5.20518	0.0255634
ENSG00000164144	ARFIP1	-0.0553525	5.86988	0.0256253
ENSG00000010030	ETV7	-0.264718	2.07694	0.0256359
ENSG00000273369	RP11-700J17.1	-0.201346	-1.19098	0.0256359
ENSG00000125249	RAP2A	0.0842423	5.72741	0.0257092
ENSG00000229204	PTGES3P3	0.190637	-2.55788	0.025712
ENSG00000167257	RNF214	0.0681775	3.44292	0.0258563
ENSG00000131469	RPL27	0.15385	6.6341	0.0258904
ENSG00000137726	FXYD6	-0.138587	0.448646	0.0258904
ENSG00000137154	RPS6	0.129237	8.65916	0.0260852
ENSG00000133742	CA1	0.244019	6.51662	0.0264883
ENSG00000263465	SRSF8	0.0543352	5.86657	0.0265388
ENSG00000070731	ST6GALNAC2	-0.0978944	4.71418	0.0266396
ENSG00000103381	CPPED1	-0.0692527	8.76511	0.0266396
ENSG00000107736	CDH23	-0.0652119	6.06456	0.0266396
ENSG00000112294	ALDH5A1	0.1314	4.87228	0.0266396
ENSG00000114738	MAPKAPK3	-0.0462714	7.11775	0.0266396
ENSG00000143674	MLK4	0.0936801	1.54981	0.0266396
ENSG00000163251	FZD5	0.120214	2.00277	0.0266396
ENSG00000168079	SCARA5	-0.249757	-1.80428	0.0266396
ENSG00000201544	SNORA16B	-0.134921	0.324632	0.0266396
ENSG00000231500	RPS18	0.142192	7.91677	0.0266396
ENSG00000108528	SLC25A11	-0.045513	5.12202	0.0267018
ENSG00000118308	LRMP	-0.0399532	7.74733	0.0267018
ENSG00000177374	HIC1	-0.122632	1.39175	0.0267018
ENSG00000078808	SDF4	-0.0569671	5.08745	0.0267264
ENSG00000086504	MRPL28	-0.0640146	4.09147	0.0267264
ENSG00000110042	DTX4	-0.0975031	3.39408	0.0267264
ENSG00000113811	SELK	0.103109	5.07437	0.0267264
ENSG00000121621	KIF18A	0.119928	1.80924	0.0267264
ENSG00000224897	POT1-AS1	-0.159651	-0.119951	0.0267264
ENSG00000159720	ATP6V0D1	-0.0635169	7.25061	0.0267427
ENSG00000273305	RP11-440D17.4	0.218575	-2.2705	0.0267427
ENSG00000092758	COL9A3	-0.270585	1.42908	0.0268108
ENSG00000188554	NBR1	-0.0321315	8.13918	0.0268108
ENSG00000156515	HK1	0.0915869	7.06234	0.02691
ENSG00000167664	TMIGD2	-0.13395	2.10173	0.02691
ENSG00000122641	INHBA	0.271993	-0.837668	0.026924
ENSG00000113369	ARRDC3	-0.079916	8.63629	0.026938
ENSG00000233093	LINC00892	0.139875	1.21605	0.026938
ENSG00000004939	SLC4A1	0.201765	8.98311	0.0270196
ENSG00000275993	CH507-42P11.8	-0.240552	-1.12948	0.0270814
ENSG00000068784	SRBD1	-0.0457586	5.7482	0.0271459
ENSG00000104408	EIF3E	0.0980054	7.13915	0.0271459
ENSG00000130175	PRKCSH	-0.0529504	5.47409	0.0271459
ENSG00000142867	BCL10	-0.040291	5.28101	0.0271871
ENSG00000008083	JARID2	-0.0547912	7.12161	0.0272019
ENSG00000244398	RP11-466H18.1	0.329594	-0.473519	0.0272019
ENSG00000145391	SETD7	0.0505529	5.40493	0.0272385
ENSG00000131174	COX7B	0.117224	3.64211	0.0273001
ENSG00000154723	ATP5J	0.0853036	3.28922	0.0273527
ENSG00000087586	AURKA	0.104374	2.24776	0.0273989
ENSG00000100985	MMP9	-0.149648	5.15959	0.0273989
ENSG00000108950	FAM20A	0.230034	-0.0596561	0.0273989
ENSG00000133275	CSNK1G2	-0.0564956	6.08577	0.0273989
ENSG00000166200	COPS2	0.0886871	5.31264	0.0273989
ENSG00000185650	ZFP36L1	0.0574464	6.12497	0.0273989
ENSG00000186577	C6orf1	-0.0703789	2.83625	0.0273989
ENSG00000213694	S1PR3	0.0890148	3.8967	0.0273989
ENSG00000087589	CASS4	-0.069591	6.02047	0.0275086
ENSG00000109220	CHIC2	-0.0408178	5.24471	0.0275086
ENSG00000124098	FAM210B	0.169782	8.28839	0.0275086
ENSG00000133884	DPF2	-0.0480968	5.15509	0.0275086
ENSG00000180211	RP1-278E11.3	0.261691	-2.17134	0.0275086
ENSG00000273249	LL09NC01-251B2.3	0.195809	-1.99524	0.0275086
ENSG00000011009	LYPLA2	-0.0619789	4.01371	0.0275862
ENSG00000070182	SPTB	0.222036	6.48583	0.0276635
ENSG00000105810	CDK6	0.0527199	6.47408	0.0276635
ENSG00000089009	RPL6	0.112139	7.55579	0.027667
ENSG00000130313	PGLS	-0.0577274	4.35892	0.0276726
ENSG00000013288	MAN2B2	-0.0481019	5.92024	0.0276874
ENSG00000123505	AMD1	-0.0362422	7.68115	0.027713
ENSG00000168004	HRASLS5	-0.161685	0.156808	0.0279146
ENSG00000231047	GCNT1P3	-0.102388	1.82433	0.0280014
ENSG00000065559	MAP2K4	-0.0384412	6.72249	0.0280149
ENSG00000104164	BLOC1S6	0.0522106	6.08276	0.0280149
ENSG00000170180	GYPA	0.177646	3.32731	0.0280149
ENSG00000119537	KDSR	0.0515079	4.36622	0.028048
ENSG00000023318	ERP44	-0.0380445	6.24705	0.0280987
ENSG00000105397	TYK2	-0.0531859	7.53188	0.0280987
ENSG00000189043	NDUFA4	0.116663	4.48391	0.0280987
ENSG00000131747	TOP2A	0.123267	2.62193	0.0281518
ENSG00000198876	DCAF12	0.155433	10.4544	0.0281518
ENSG00000273812	WI2-87327B8.2	-0.163635	-0.0899826	0.028157
ENSG00000008324	SS18L2	0.0926442	2.86358	0.0282424
ENSG00000236829	Z97634.3	-0.114862	0.780253	0.0282424
ENSG00000142405	NLRP12	-0.0658993	7.27855	0.0282672
ENSG00000138758	2021-09-11	0.0491062	5.57442	0.0283703
ENSG00000133816	MICAL2	0.105231	8.15409	0.0285264
ENSG00000173372	C1QA	-0.191966	1.34089	0.0287157
ENSG00000227008	RP3-417G15.1	0.27758	-1.86481	0.0287733
ENSG00000204020	LIPN	-0.131189	4.05345	0.0288062
ENSG00000125734	GPR108	-0.056694	5.19085	0.0288234
ENSG00000177427	MIEF2	-0.0579149	3.24604	0.0288722
ENSG00000080824	HSP90AA1	0.0972043	7.31071	0.0288768
ENSG00000264548	RP13-516M14.2	-0.180646	-0.740497	0.0289124
ENSG00000173915	USMG5	0.0849325	3.4471	0.0290372
ENSG00000183019	MCEMP1	0.129154	1.80016	0.0290372
ENSG00000214784	AC010468.1	0.313996	-1.13391	0.0290372
ENSG00000181409	AATK	-0.109531	4.6446	0.0290807
ENSG00000219626	FAM228B	0.043631	4.13013	0.0290807
ENSG00000137266	SLC22A23	0.10956	2.54245	0.0292663
ENSG00000139354	GAS2L3	0.11722	1.38154	0.02931
ENSG00000149182	ARFGAP2	-0.0378964	6.50247	0.02931
ENSG00000077684	JADE1	-0.0340937	6.76414	0.0293294
ENSG00000102753	KPNA3	0.0443813	4.92522	0.0293294
ENSG00000116678	LEPR	0.111754	3.67345	0.0293294
ENSG00000268670	CTD-2622I13.3	-0.085566	2.32264	0.0293294
ENSG00000235314	LINC00957	-0.0782415	2.53916	0.0294049
ENSG00000213842	SUGT1P2	-0.111891	0.813719	0.0294462
ENSG00000088854	C20orf194	0.0542951	4.55909	0.0294956
ENSG00000156642	NPTN	-0.0346373	6.33641	0.0295147
ENSG00000177868	CCDC23	0.10051	3.85414	0.0295147
ENSG00000138160	KIF11	0.104518	2.35887	0.0295595
ENSG00000141084	RANBP10	0.135453	5.14136	0.0295595
ENSG00000170006	TMEM154	-0.0536217	9.60702	0.0295595
ENSG00000258473	RP11-7F17.4	-0.229944	-2.05883	0.0295595
ENSG00000080200	CRYBG3	0.0559443	5.90795	0.0295783
ENSG00000039068	CDH1	0.165403	2.7931	0.0296022
ENSG00000196072	BLOC1S2	0.0823316	4.3838	0.0296537
ENSG00000104885	DOT1L	0.0876194	3.17724	0.0296996
ENSG00000173406	DAB1	0.157413	0.183824	0.0296996
ENSG00000088298	EDEM2	-0.0376021	5.63022	0.0297114
ENSG00000238243	OR2W3	0.218821	4.80804	0.0297114
ENSG00000214535	RPS15AP1	0.282134	-1.62119	0.029743
ENSG00000119013	NDUFB3	0.120385	2.81602	0.0298603
ENSG00000169397	RNASE3	0.259551	0.288587	0.0298899
ENSG00000234797	RPS3AP6	0.330832	1.19858	0.0298899
ENSG00000155827	RNF20	-0.0355571	6.52599	0.0299386
ENSG00000165688	PMPCA	-0.0366989	4.24155	0.0299693
ENSG00000111846	GCNT2	0.0734502	4.10638	0.0300189
ENSG00000047249	ATP6V1H	-0.0294206	5.28414	0.0300192
ENSG00000072506	HSD17B10	-0.0579692	4.18623	0.0302194
ENSG00000149792	MRPL49	-0.0394604	4.93615	0.0302194
ENSG00000137200	CMTR1	-0.0528235	6.44656	0.0302235
ENSG00000047597	XK	0.194508	5.62088	0.0303031
ENSG00000127837	AAMP	-0.0508457	5.18626	0.0303442
ENSG00000232022	FAAHP1	0.159073	0.912893	0.03037
ENSG00000265992	ESRG	0.283808	-2.26329	0.03037
ENSG00000268861	CTD-2207O23.3	-0.126678	-0.322606	0.03037
ENSG00000260997	RP4-647J21.1	0.123396	1.80625	0.0304018
ENSG00000279369	RP11-51F16.1	-0.0535534	5.02623	0.0304018
ENSG00000273096	RP3-508I15.20	0.0863223	1.72321	0.0304352
ENSG00000142347	MYO1F	-0.0649297	9.24798	0.030488
ENSG00000243147	MRPL33	0.0569792	3.77974	0.0305264
ENSG00000117834	SLC5A9	-0.176102	-0.168371	0.0306468
ENSG00000070526	ST6GALNAC1	0.197353	0.96632	0.0306508
ENSG00000254694	RP11-50B3.4	-0.149812	-0.298673	0.0306529
ENSG00000137414	FAM8A1	-0.062676	7.35425	0.0307336
ENSG00000177885	GRB2	-0.0401903	8.28392	0.0307336
ENSG00000173320	STOX2	0.242369	-1.68154	0.0307706
ENSG00000092203	TOX4	-0.0279821	6.65306	0.0308547
ENSG00000132825	PPP1R3D	-0.0433923	5.51782	0.0309386
ENSG00000184007	PTP4A2	0.040501	8.0552	0.0310385
ENSG00000132541	HRSP12	0.124719	1.01804	0.0313564
ENSG00000148655	C10orf11	0.115277	2.30594	0.0313564
ENSG00000198909	MAP3K3	-0.0466169	7.03636	0.0313564
ENSG00000161944	ASGR2	0.107268	1.97679	0.0313631
ENSG00000116350	SRSF4	-0.0303233	6.57575	0.0313714
ENSG00000158195	WASF2	0.0899664	6.87775	0.0313714
ENSG00000183850	ZNF730	0.221781	-2.14661	0.0313714
ENSG00000213689	TREX1	-0.0868785	3.36589	0.0314855
ENSG00000142856	ITGB3BP	0.0867798	3.0705	0.0315739
ENSG00000167657	DAPK3	-0.0659491	4.00251	0.0315739
ENSG00000185480	PARPBP	0.0957005	2.2477	0.0315902
ENSG00000187257	RSBN1L	-0.0322817	6.75626	0.0315902
ENSG00000103490	PYCARD	-0.0718586	5.53782	0.0315981
ENSG00000110876	SELPLG	-0.0611652	7.92791	0.0316157
ENSG00000130598	TNNI2	-0.116071	1.08651	0.0316157
ENSG00000134333	LDHA	0.0486125	6.92114	0.0316157
ENSG00000197912	SPG7	-0.0389046	6.08925	0.0316157
ENSG00000272030	RP1-178F15.4	-0.17472	-0.754459	0.0316157
ENSG00000068831	RASGRP2	-0.0571375	7.41286	0.0317924
ENSG00000090889	KIF4A	0.150407	0.64511	0.0317924
ENSG00000110628	SLC22A18	-0.0896798	3.1803	0.0317924
ENSG00000156469	MTERF3	0.0632117	3.20422	0.0317924
ENSG00000163655	GMPS	0.0362136	5.64373	0.0318773
ENSG00000169439	SDC2	-0.198397	0.9926	0.0319806
ENSG00000089820	ARHGAP4	-0.0647594	6.97821	0.0320521
ENSG00000136888	ATP6V1G1	0.081373	5.59586	0.0320521
ENSG00000152242	C18orf25	-0.0346225	6.83687	0.0320521
ENSG00000101224	CDC25B	0.067704	5.21551	0.0322101
ENSG00000109805	NCAPG	0.155951	1.51116	0.0322597
ENSG00000169919	GUSB	-0.0402005	4.96868	0.0323013
ENSG00000106682	EIF4H	-0.0294014	7.11984	0.0323114
ENSG00000111186	WNT5B	-0.176949	-0.270849	0.0323653
ENSG00000171714	ANO5	0.147971	1.21158	0.0324363
ENSG00000137601	NEK1	0.0580508	4.6091	0.0324447
ENSG00000163171	CDC42EP3	0.0516809	7.55903	0.0325762
ENSG00000178904	DPY19L3	-0.0532473	5.42306	0.0325961
ENSG00000132196	HSD17B7	-0.0431296	3.74423	0.0327219
ENSG00000113643	RARS	0.0590191	5.40269	0.0328021
ENSG00000168653	NDUFS5	0.0965557	3.45071	0.0328021
ENSG00000183688	FAM101B	-0.0755444	6.52326	0.0328327
ENSG00000019995	ZRANB1	0.0591135	6.66838	0.0328771
ENSG00000109103	UNC119	-0.0467602	6.31216	0.0328875
ENSG00000232112	TMA7	0.123822	3.76059	0.0329327
ENSG00000077454	LRCH4	-0.0624035	5.15125	0.0329555
ENSG00000109062	SLC9A3R1	-0.0573732	6.01344	0.0329555
ENSG00000131408	NR1H2	-0.0595941	5.0658	0.0329555
ENSG00000213741	RPS29	0.136796	6.64949	0.0329555
ENSG00000169220	RGS14	-0.0608124	6.33395	0.0331243
ENSG00000100225	FBXO7	0.125376	9.97776	0.0332908
ENSG00000101473	ACOT8	-0.0357931	4.52728	0.0333405
ENSG00000130766	SESN2	-0.0738643	3.13962	0.033634
ENSG00000234076	TPRG1-AS1	0.189465	-0.373592	0.0337341
ENSG00000107789	MINPP1	0.076362	3.52743	0.0338329
ENSG00000112561	TFEB	-0.0571019	5.24144	0.0340502
ENSG00000140526	ABHD2	-0.0696235	8.4346	0.0343161
ENSG00000197852	FAM212B	-0.0679364	7.07609	0.0343161
ENSG00000112195	TREML2	-0.0691027	6.15246	0.0343619
ENSG00000157445	CACNA2D3	-0.0892923	2.54265	0.0345247
ENSG00000168394	TAP1	-0.0641534	8.11559	0.0345892
ENSG00000213523	SRA1	-0.0424632	4.8437	0.0346541
ENSG00000100319	ZMAT5	-0.0630258	3.23355	0.034702
ENSG00000204010	IFIT1B	0.20513	5.3673	0.034702
ENSG00000133026	MYH10	0.132572	0.615505	0.0349008
ENSG00000106003	LFNG	-0.0577459	6.89493	0.0350354
ENSG00000242113	RN7SL124P	-0.19046	-0.569337	0.0350407
ENSG00000108244	KRT23	-0.120109	6.36807	0.0351841
ENSG00000174744	BRMS1	-0.052622	4.85141	0.0351841
ENSG00000203814	HIST2H2BF	-0.0610856	5.90382	0.0352702
ENSG00000204345	CD300LD	-0.315412	-0.690709	0.0353349
ENSG00000238241	CCR12P	-0.230413	-0.927807	0.0353906
ENSG00000127948	POR	-0.0648613	5.07184	0.0354297
ENSG00000110321	EIF4G2	0.0319347	8.52674	0.0354393
ENSG00000114520	SNX4	0.089426	4.02799	0.0355226
ENSG00000125780	TGM3	-0.176416	2.03583	0.0355305
ENSG00000088325	TPX2	0.119246	1.81605	0.0355549
ENSG00000213693	SEC14L1P1	-0.0584147	3.03363	0.0356195
ENSG00000071553	ATP6AP1	-0.0461773	5.79706	0.0359643
ENSG00000054967	RELT	-0.0579002	6.80615	0.0359759
ENSG00000187097	ENTPD5	0.0894796	4.32959	0.0363679
ENSG00000092531	SNAP23	-0.0389124	7.51823	0.0364901
ENSG00000154027	AK5	-0.127793	3.5657	0.0365687
ENSG00000160211	G6PD	-0.0768006	5.71756	0.0365687
ENSG00000170871	KIAA0232	-0.0332838	7.94473	0.03688
ENSG00000141699	FAM134C	-0.0319576	6.81969	0.0371751
ENSG00000164512	ANKRD55	-0.113497	2.59022	0.0371751
ENSG00000267002	RP11-242D8.1	-0.0601916	2.59008	0.0372231
ENSG00000113194	FAF2	-0.023955	5.86165	0.0372758
ENSG00000102900	NUP93	-0.0370909	5.44967	0.037422
ENSG00000113068	PFDN1	0.0530734	2.95355	0.0375179
ENSG00000221823	PPP3R1	0.0897348	6.21082	0.0375179
ENSG00000176658	MYO1D	0.0684026	3.58474	0.0376977
ENSG00000122034	GTF3A	0.0572725	6.08176	0.0378416
ENSG00000227063	RPL41P1	0.23316	-0.832142	0.0378416
ENSG00000263648	RP11-471L13.3	-0.0848742	1.73569	0.0378416
ENSG00000135048	TMEM2	-0.0363546	7.71205	0.0378962
ENSG00000165406	2021-03-08	0.141157	8.99919	0.0378962
ENSG00000028137	TNFRSF1B	-0.0566624	8.35583	0.0380116
ENSG00000058668	ATP2B4	0.0709173	7.32854	0.0380116
ENSG00000127328	RAB3IP	0.0553492	4.82707	0.0380116
ENSG00000140319	SRP14	0.0723127	5.2924	0.0380116
ENSG00000147650	LRP12	0.0960495	2.19304	0.0380116
ENSG00000113812	ACTR8	-0.0303747	5.38147	0.0381165
ENSG00000105669	COPE	-0.0638511	5.17005	0.0381581
ENSG00000148841	ITPRIP	-0.050682	7.14484	0.0381684
ENSG00000157881	PANK4	-0.0428963	4.98343	0.0381684
ENSG00000175567	UCP2	0.0841137	5.73566	0.0381699
ENSG00000174442	ZWILCH	0.0684699	2.99338	0.0382388
ENSG00000101773	RBBP8	0.080065	3.79281	0.0386151
ENSG00000105767	CADM4	-0.124853	1.04688	0.0386151
ENSG00000197057	DTHD1	-0.12176	4.70261	0.0386151
ENSG00000156110	ADK	0.0581766	4.79009	0.0387036
ENSG00000183734	ASCL2	-0.112151	2.224	0.0387537
ENSG00000156853	ZNF689	-0.0415012	3.96188	0.0391466
ENSG00000068745	IP6K2	-0.0267289	5.55744	0.0392479
ENSG00000262049	RP13-1032I1.7	-0.0804556	2.15504	0.0393294
ENSG00000081913	PHLPP1	-0.0662866	4.22567	0.0393906
ENSG00000102837	OLFM4	0.336317	1.995	0.0394411
ENSG00000166387	PPFIBP2	-0.0679725	4.52096	0.0395038
ENSG00000139734	DIAPH3	0.162486	0.38203	0.0395572
ENSG00000171236	LRG1	-0.0935612	6.06345	0.0396158
ENSG00000164414	SLC35A1	0.105009	2.92771	0.0396516
ENSG00000185608	MRPL40	0.0974753	2.4072	0.0396516
ENSG00000091436	pk	0.0648834	5.0909	0.0396553
ENSG00000120949	TNFRSF8	-0.0742691	3.46944	0.0396655
ENSG00000187808	SOWAHD	-0.0857297	2.70153	0.0396655
ENSG00000238222	MKRN4P	0.297426	-1.00987	0.0399431
ENSG00000010256	UQCRC1	-0.0511729	5.79062	0.0400493
ENSG00000254275	LINC00824	0.2002	0.876472	0.0400493
ENSG00000149761	NUDT22	-0.0535088	3.90141	0.0400522
ENSG00000226221	RPL26P19	0.302261	-1.36353	0.0401847
ENSG00000140259	MFAP1	-0.0424137	5.12113	0.0403911
ENSG00000134779	TPGS2	0.0724818	6.22312	0.0404167
ENSG00000197323	TRIM33	-0.0298792	7.50309	0.0404167
ENSG00000079215	SLC1A3	0.160064	0.363758	0.040451
ENSG00000140632	GLYR1	-0.0289243	6.41716	0.0406218
ENSG00000232380	ZDHHC20P4	0.192004	-0.470201	0.0406218
ENSG00000166974	MAPRE2	-0.0301019	6.51568	0.040629
ENSG00000105186	ANKRD27	0.0277709	5.70743	0.0407776
ENSG00000170425	ADORA2B	0.126155	0.386742	0.0407776
ENSG00000112306	RPS12	0.0813275	8.75435	0.0408488
ENSG00000164849	GPR146	0.173814	4.27861	0.0408488
ENSG00000182749	PAQR7	-0.076822	2.9744	0.0408901
ENSG00000175756	AURKAIP1	-0.0678342	4.48329	0.0408967
ENSG00000108312	UBTF	-0.0356208	6.61528	0.0409876
ENSG00000115415	STAT1	-0.0856725	9.27663	0.0409876
ENSG00000118292	C1orf54	0.179004	-0.859629	0.0409876
ENSG00000128311	TST	-0.0803653	3.76613	0.0409876
ENSG00000153551	CMTM7	-0.0385721	5.61742	0.0409876
ENSG00000155287	SLC25A28	-0.0379696	4.89814	0.0409876
ENSG00000155959	VBP1	0.0918148	4.2442	0.0409876
ENSG00000166743	ACSM1	-0.171023	-0.541595	0.0409876
ENSG00000167863	ATP5H	0.0479898	4.95457	0.0409876
ENSG00000171858	RPS21	0.13161	5.52245	0.0409876
ENSG00000197362	ZNF786	-0.0450928	3.64078	0.0409876
ENSG00000233270	SNRPEP4	0.200588	-2.02394	0.0409876
ENSG00000234737	KRT18P15	0.177196	0.360605	0.0409876
ENSG00000231419	LINC00689	0.272603	-1.51279	0.0411331
ENSG00000146242	TPBG	0.22419	-1.00808	0.0411345
ENSG00000177963	RIC8A	-0.0435405	6.18511	0.0411426
ENSG00000162775	RBM15	-0.0307585	6.58157	0.0411694
ENSG00000219755	RP1-199J3.5	0.201821	-2.32871	0.0411694
ENSG00000073464	CLCN4	-0.128616	3.98364	0.0412821
ENSG00000106615	RHEB	0.0438847	4.47046	0.0412821
ENSG00000107290	SETX	-0.0408965	9.73755	0.0412821
ENSG00000160593	AMICA1	-0.0454347	10.0419	0.0412821
ENSG00000242802	AP5Z1	-0.0579026	4.80026	0.0412821
ENSG00000183484	GPR132	-0.0449608	5.65271	0.0413813
ENSG00000112511	PHF1	-0.0407599	5.01596	0.0414434
ENSG00000204177	BMS1P1	0.113099	2.38029	0.0414434
ENSG00000148411	NACC2	-0.051441	5.95063	0.0414783
ENSG00000108405	P2RX1	-0.0960265	5.15195	0.0414822
ENSG00000115590	IL1R2	-0.0823942	6.41002	0.0414822
ENSG00000151651	ADAM8	-0.0653618	7.56182	0.0414822
ENSG00000175463	TBC1D10C	-0.060431	7.08265	0.0414822
ENSG00000197081	IGF2R	-0.0829337	10.0663	0.0414822
ENSG00000274678	RP11-2C24.7	-0.199924	-2.14549	0.0414822
ENSG00000150093	ITGB1	0.0560747	8.28028	0.0414917
ENSG00000185477	GPRIN3	0.0543286	7.62253	0.0414917
ENSG00000180316	PNPLA1	-0.101037	1.9759	0.0415241
ENSG00000246985	SOCS2-AS1	0.117184	0.690816	0.0415492
ENSG00000181827	RFX7	0.0446105	5.51678	0.0415627
ENSG00000104824	HNRNPL	-0.0312286	7.0304	0.0417754
ENSG00000156136	DCK	0.0504732	5.96783	0.0418591
ENSG00000002834	LASP1	-0.0436117	7.78492	0.0418878
ENSG00000135900	MRPL44	-0.0431844	4.84717	0.0419171
ENSG00000165895	ARHGAP42	0.107734	1.96164	0.041961
ENSG00000065911	MTHFD2	0.0606085	4.98312	0.0419946
ENSG00000138750	NUP54	0.0449806	5.04058	0.042007
ENSG00000155749	ALS2CR12	0.118106	4.09414	0.042007
ENSG00000211892	IGHG4	-0.314076	-0.372707	0.042007
ENSG00000164398	ACSL6	0.0740983	4.05711	0.0420394
ENSG00000101367	MAPRE1	-0.0248406	6.876	0.0420695
ENSG00000173261	PLAC8L1	0.195969	-1.72763	0.0420695
ENSG00000257773	ST13P3	0.177741	-2.41675	0.0422621
ENSG00000110092	CCND1	-0.154438	-0.220228	0.04236
ENSG00000124155	PIGT	-0.0427338	5.07925	0.0424542
ENSG00000171611	PTCRA	-0.152804	1.9979	0.0424542
ENSG00000171700	RGS19	-0.0474092	6.33662	0.0424542
ENSG00000263266	RPS7P1	0.326871	-0.472789	0.0424542
ENSG00000258476	RP11-76E17.3	-0.141645	2.67397	0.0425326
ENSG00000022567	SLC45A4	-0.072432	6.90403	0.0425664
ENSG00000175931	UBE2O	0.149676	5.52575	0.0425702
ENSG00000273149	RP11-290D2.6	0.202386	-0.8729	0.0425899
ENSG00000053918	KCNQ1	-0.0595284	4.88112	0.0426153
ENSG00000067225	PKM	0.0540152	6.65981	0.0426153
ENSG00000118181	RPS25	0.0959065	7.24885	0.0426153
ENSG00000129292	PHF20L1	-0.0411961	8.26217	0.0426153
ENSG00000136451	VEZF1	-0.0220862	6.56895	0.0426153
ENSG00000138764	CCNG2	-0.0448589	6.49295	0.0426153
ENSG00000163519	TRAT1	0.0931326	5.51618	0.0426153
ENSG00000165704	HPRT1	0.0896769	2.12875	0.0426153
ENSG00000173064	HECTD4	0.0678162	7.25658	0.0426153
ENSG00000174358	SLC6A19	0.327565	-0.715126	0.0426153
ENSG00000185950	IRS2	-0.0690481	5.25913	0.0426153
ENSG00000183032	SLC25A21	0.251531	-1.76419	0.04268
ENSG00000162300	ZFPL1	-0.0424897	3.4333	0.0427524
ENSG00000110719	TCIRG1	-0.0703399	7.17839	0.0428016
ENSG00000134215	VAV3	-0.0385649	6.72988	0.0428016
ENSG00000011426	ANLN	0.127918	1.49342	0.0428464
ENSG00000243679	RP11-274B21.3	0.135085	-0.150184	0.0428464
ENSG00000104325	DECR1	-0.0349212	6.78283	0.042877
ENSG00000163701	IL17RE	0.206806	-1.21505	0.042877
ENSG00000218809	RP1-229K20.5	-0.0872648	2.96374	0.0429775
ENSG00000174243	DDX23	-0.0371496	6.94637	0.0430135
ENSG00000124406	ATP8A1	-0.0483492	7.6492	0.0432793
ENSG00000167261	DPEP2	-0.0637156	6.59633	0.0433406
ENSG00000170876	TMEM43	-0.0375694	7.00937	0.0433406
ENSG00000198901	PRC1	0.0730271	2.37981	0.0433474
ENSG00000132773	TOE1	-0.04313	3.55673	0.043412
ENSG00000109756	RAPGEF2	-0.049664	7.32028	0.0434798
ENSG00000142409	ZNF787	-0.0578174	4.02528	0.0434798
ENSG00000107485	GATA3	0.0754189	2.3774	0.043554
ENSG00000221866	PLXNA4	0.124443	2.91331	0.043554
ENSG00000111728	ST8SIA1	0.0980681	3.95616	0.0435963
ENSG00000114942	EEF1B2	0.143776	5.57269	0.0435963
ENSG00000156802	ATAD2	0.0502929	5.05404	0.0435963
ENSG00000234782	TPT1P9	0.251776	-0.997126	0.0436246
ENSG00000184281	TSSC4	-0.0666132	4.3741	0.04388
ENSG00000143878	RHOB	-0.0676616	6.14053	0.0439042
ENSG00000134460	IL2RA	0.0760688	3.76864	0.0439476
ENSG00000149131	SERPING1	-0.209976	2.38377	0.0439506
ENSG00000268734	CTB-61M7.2	-0.0893689	2.69808	0.0439506
ENSG00000233070	ZFY-AS1	0.166487	-2.44284	0.0440447
ENSG00000265996	MIR3671	-0.0818154	2.37727	0.0440447
ENSG00000142168	SOD1	0.0590792	5.34568	0.0440932
ENSG00000162434	JAK1	-0.0416734	9.50615	0.0440932
ENSG00000235568	NFAM1	-0.0686969	6.80428	0.0440932
ENSG00000274008	Metazoa_SRP	-0.0931527	1.49508	0.0440932
ENSG00000197694	SPTAN1	0.0578632	7.50707	0.0441151
ENSG00000023909	GCLM	0.0516451	4.38479	0.0441967
ENSG00000090266	NDUFB2	0.0690574	4.01762	0.0442761
ENSG00000182648	LINC01006	0.117745	0.972564	0.0442761
ENSG00000269896	RP4-740C4.5	-0.131701	0.0205666	0.0447361
ENSG00000280279	RP11-1228E12.1	0.214816	-2.2447	0.0447952
ENSG00000164691	TAGAP	-0.0389003	8.50477	0.0449796
ENSG00000169288	MRPL1	0.0906425	2.66401	0.0451572
ENSG00000162702	ZNF281	-0.0452065	6.71281	0.0452261
ENSG00000087152	ATXN7L3	-0.0345752	6.15253	0.0453031
ENSG00000126254	RBM42	-0.0670121	3.08127	0.0453031
ENSG00000222726	RNU2-7P	0.199001	-2.24169	0.0453031
ENSG00000136630	HLX	-0.0731284	4.49542	0.0453093
ENSG00000233087	AC073869.1	0.175627	-2.47068	0.0458393
ENSG00000172239	PAIP1	0.060712	4.26569	0.045881
ENSG00000188986	NELFB	-0.0518247	4.78853	0.0460024
ENSG00000123689	G0S2	-0.190973	0.138356	0.0460494
ENSG00000013619	MAMLD1	0.151726	0.21873	0.0460967
ENSG00000241511	RPS15AP24	0.211135	-2.43019	0.0460967
ENSG00000236320	SLFN14	0.158082	3.14198	0.0461191
ENSG00000239653	PSMD6-AS2	-0.0621895	5.57902	0.0461844
ENSG00000115944	COX7A2L	0.0514109	5.54368	0.0461923
ENSG00000012660	ELOVL5	-0.0306867	8.05947	0.0463805
ENSG00000185842	DNAH14	0.205203	-0.368469	0.0463805
ENSG00000142197	DOPEY2	0.0502113	5.48846	0.0464189
ENSG00000164715	LMTK2	-0.0597331	6.06308	0.0464604
ENSG00000072840	EVC	0.147398	0.514224	0.0465493
ENSG00000132405	TBC1D14	-0.0441988	7.80912	0.0465493
ENSG00000155090	KLF10	0.0744344	3.60321	0.0465493
ENSG00000238164	RP3-395M20.8	-0.0680827	3.19912	0.0465493
ENSG00000115183	TANC1	0.180137	-0.310776	0.0466563
ENSG00000115421	PAPOLG	-0.0288168	6.29017	0.0468089
ENSG00000154781	CCDC174	-0.0268062	5.27749	0.0468089
ENSG00000183624	HMCES	-0.0373643	4.99711	0.0468089
ENSG00000226084	RP4-706A16.3	0.306972	-0.594295	0.0468941
ENSG00000153234	NR4A2	-0.115814	0.679594	0.046946
ENSG00000206344	HCG27	-0.0558865	7.37638	0.046946
ENSG00000207445	SNORD15B	0.199743	2.04272	0.046946
ENSG00000226081	USP12PX	0.190719	-2.49152	0.046946
ENSG00000257704	INAFM1	-0.0982511	1.06845	0.0470394
ENSG00000265666	RARA-AS1	-0.0787022	2.61271	0.0470394
ENSG00000073169	SELO	-0.0538114	4.01175	0.0472289
ENSG00000113761	ZNF346	0.0554751	4.09036	0.0472289
ENSG00000132842	AP3B1	-0.0293944	7.3085	0.0472289
ENSG00000161057	PSMC2	0.0612452	5.03917	0.0472289
ENSG00000197312	DDI2	0.0332022	6.32486	0.0472289
ENSG00000120868	APAF1	-0.0435061	7.82621	0.0472934
ENSG00000141469	SLC14A1	0.146497	5.64013	0.0472934
ENSG00000270067	CTC-487M23.5	0.109513	0.56344	0.0472952
ENSG00000173894	CBX2	-0.192955	-1.74106	0.0475528
ENSG00000185627	PSMD13	-0.0306733	6.09117	0.0475541
ENSG00000177706	FAM20C	0.111428	1.31291	0.047672
ENSG00000257242	C12orf79	-0.0692916	3.01761	0.047672
ENSG00000262246	CORO7	-0.0487887	4.45746	0.047672
ENSG00000246731	MGC16275	-0.0730246	2.38549	0.0476761
ENSG00000129696	TTI2	-0.0368661	4.1162	0.0477495
ENSG00000234614	AL450992.2	0.0968841	1.85152	0.0477495
ENSG00000070614	NDST1	-0.0879856	5.76866	0.0478151
ENSG00000112773	FAM46A	-0.0474654	6.28497	0.0478151
ENSG00000278238	RP11-245D16.4	0.203778	-1.50631	0.0478151
ENSG00000171051	FPR1	-0.0690029	9.54497	0.0478521
ENSG00000135549	PKIB	0.201666	-1.264	0.047873
ENSG00000225889	AC074289.1	-0.0780477	4.65746	0.0480534
ENSG00000005007	UPF1	-0.0519006	6.82109	0.0480592
ENSG00000092439	TRPM7	0.0403697	7.17602	0.0480592
ENSG00000109321	AREG	-0.255273	-1.70523	0.0480592
ENSG00000123815	ADCK4	-0.0434066	4.35022	0.0480592
ENSG00000100744	GSKIP	0.0779534	4.30508	0.0481133
ENSG00000231304	AC107622.1	0.216164	-1.35136	0.0481133
ENSG00000165516	KLHDC2	0.0457783	5.64926	0.048395
ENSG00000184489	PTP4A3	-0.0824872	4.0256	0.048395
ENSG00000101557	USP14	0.0500256	4.61494	0.0485103
ENSG00000245552	RP11-712B9.2	0.0848261	2.73445	0.0485103
ENSG00000111786	SRSF9	-0.0263587	6.5342	0.0487048
ENSG00000254750	CASP1P2	0.115418	1.98003	0.0489283
ENSG00000273749	CYFIP1	0.0565437	5.56314	0.0490023
ENSG00000278133	RP11-196G11.5	-0.0451522	3.56513	0.0490023
ENSG00000197622	CDC42SE1	-0.0289138	9.70423	0.0490604
ENSG00000130638	ATXN10	0.0363899	5.28434	0.0490769
ENSG00000186716	BCR	-0.054015	5.75079	0.0490769
ENSG00000243609	RPS2P44	-0.0758686	3.27425	0.0490769
ENSG00000137275	RIPK1	-0.0323753	6.10662	0.0491428
ENSG00000163956	LRPAP1	-0.0447116	6.3993	0.0491428
ENSG00000273576	RP11-390P24.1	0.0834152	1.47164	0.0491428
ENSG00000125637	PSD4	-0.04893	8.12502	0.0491727
ENSG00000169967	MAP3K2	-0.0366059	8.72464	0.0492191
ENSG00000148344	PTGES	-0.235532	-0.682054	0.0493012
ENSG00000167110	GOLGA2	-0.0480219	5.27337	0.0493012
ENSG00000186132	C2orf76	0.0797215	1.65748	0.0494508
ENSG00000116741	RGS2	-0.069811	9.17757	0.049607
ENSG00000095906	NUBP2	-0.0613502	4.00308	0.0496738
ENSG00000100266	PACSIN2	-0.0526561	7.47666	0.049707
ENSG00000116906	GNPAT	0.0283081	5.67278	0.049707
ENSG00000128487	SPECC1	0.109733	8.07279	0.049707
ENSG00000141337	ARSG	-0.0495227	5.71247	0.049707
ENSG00000142657	PGD	-0.0585034	7.81286	0.049707
ENSG00000159399	HK2	-0.0605635	6.38296	0.049707
ENSG00000160216	AGPAT3	0.0451294	5.73895	0.049707
ENSG00000177565	TBL1XR1	0.0397226	7.8143	0.049707
ENSG00000241878	PISD	-0.0619482	6.27628	0.049707
ENSG00000260572	RP11-16N11.2	0.111365	0.813538	0.049707
ENSG00000171169	NAIF1	-0.0478517	3.73861	0.0497683
ENSG00000173914	RBM4B	-0.0350008	3.98293	0.0498008
ENSG00000177426	TGIF1	-0.0446442	4.67371	0.0498008
ENSG00000231120	BTF3P10	0.217262	-2.05312	0.0498008
ENSG00000206560	ANKRD28	0.0490848	6.16967	0.0500602
ENSG00000174977	AC026271.5	0.188524	-0.0271002	0.0500963
ENSG00000267030	CTB-50L17.7	-0.184834	-1.80616	0.0500963
ENSG00000140379	BCL2A1	0.124612	4.50127	0.050195
ENSG00000120662	MTRF1	0.0493044	3.96418	0.0504653
ENSG00000159403	C1R	-0.13099	0.0977221	0.0504653
ENSG00000119912	IDE	0.0325259	5.5344	0.0504783
ENSG00000130827	PLXNA3	0.0864779	3.33479	0.0504783
ENSG00000239415	AP001469.9	0.145159	0.0644058	0.0507728
ENSG00000164162	ANAPC10	0.0603937	3.0865	0.0509262
ENSG00000164713	BRI3	-0.0447923	5.59446	0.0509473
ENSG00000100490	CDKL1	0.0828381	4.02422	0.051013
ENSG00000117153	KLHL12	-0.0288976	5.97514	0.0510272
ENSG00000178429	RPS3AP5	0.252369	0.459761	0.0510272
ENSG00000185630	PBX1	0.147501	3.47762	0.0512281
ENSG00000162881	OXER1	-0.104188	1.55314	0.0513142
ENSG00000111859	NEDD9	-0.055848	7.53214	0.0513717
ENSG00000155729	KCTD18	-0.0294572	4.87472	0.0513717
ENSG00000233820	RP11-535M15.2	0.244466	-1.06887	0.0513717
ENSG00000264663	KRT8P34	-0.082681	1.83436	0.0513717
ENSG00000122644	ARL4A	0.117349	4.66761	0.0513977
ENSG00000183421	RIPK4	-0.212676	-1.57633	0.0513977
ENSG00000024862	CCDC28A	-0.0409653	5.04911	0.051528
ENSG00000108691	CCL2	-0.245007	-1.96354	0.051528
ENSG00000108771	DHX58	-0.0885951	4.57406	0.051528
ENSG00000125952	MAX	-0.0348292	7.09506	0.051528
ENSG00000164548	TRA2A	-0.0304029	6.74741	0.051528
ENSG00000188191	PRKAR1B	-0.0872609	2.07885	0.051528
ENSG00000204387	C6orf48	0.0692043	5.2572	0.051528
ENSG00000226180	RP11-278A23.1	-0.113999	0.485057	0.051528
ENSG00000105352	CEACAM4	-0.0881234	5.34523	0.0515281
ENSG00000196792	STRN3	0.0362718	5.27497	0.0515281
ENSG00000101161	PRPF6	-0.0433237	6.40714	0.0516019
ENSG00000137210	TMEM14B	0.0476491	4.33495	0.0517518
ENSG00000143977	SNRPG	0.0847983	3.05412	0.0519143
ENSG00000236439	RP11-175B9.3	0.268951	-1.54044	0.0519143
ENSG00000256651	RP11-144O23.8	0.179823	-1.16804	0.0520751
ENSG00000140350	ANP32A	-0.0252603	7.51346	0.0521612
ENSG00000172893	DHCR7	-0.0772171	1.9047	0.0521612
ENSG00000182010	RTKN2	0.11644	3.69982	0.0523337
ENSG00000186591	UBE2H	0.0914852	7.9078	0.0523337
ENSG00000256269	HMBS	0.12031	3.71063	0.0523337
ENSG00000264354	MIR3134	0.193499	-2.00673	0.0523337
ENSG00000021488	SLC7A9	0.194035	-2.26772	0.0524349
ENSG00000267194	RP1-193H18.2	-0.0637124	3.41167	0.0524569
ENSG00000157184	CPT2	-0.0382594	4.28518	0.0525202
ENSG00000143224	PPOX	0.0525414	3.65843	0.0525856
ENSG00000167434	CA4	-0.102783	3.30245	0.0525856
ENSG00000157837	SPPL3	0.0538421	4.89881	0.0525944
ENSG00000142794	NBPF3	-0.0905258	3.72593	0.0526346
ENSG00000198663	C6orf89	-0.0256767	6.82468	0.052724
ENSG00000135272	MDFIC	0.0509791	6.44547	0.0527984
ENSG00000172530	BANP	-0.0412901	6.04247	0.0528642
ENSG00000184575	XPOT	0.0369004	6.13876	0.0529002
ENSG00000116957	TBCE	0.0519448	3.2201	0.0529643
ENSG00000244045	TMEM199	-0.0292316	4.88315	0.0529643
ENSG00000173020	ADRBK1	-0.0496721	7.86759	0.0530482
ENSG00000111450	STX2	0.0767357	3.87082	0.0531139
ENSG00000157557	ETS2	-0.0504527	6.45227	0.0531139
ENSG00000140545	MFGE8	0.0872983	2.12697	0.0533093
ENSG00000183486	MX2	-0.0707972	7.82004	0.0533638
ENSG00000185112	FAM43A	-0.0696461	3.48819	0.0533885
ENSG00000168209	DDIT4	-0.0906833	4.57848	0.05347
ENSG00000172867	KRT2	-0.203311	-2.18065	0.05347
ENSG00000182871	COL18A1	-0.127584	5.21798	0.05347
ENSG00000239948	RN7SL368P	-0.106274	0.913571	0.05347
ENSG00000253210	RP11-809O17.1	-0.0882847	2.06387	0.05347
ENSG00000277481	PKD1L3	0.20775	0.524649	0.05347
ENSG00000131323	TRAF3	0.0428414	5.4614	0.0534712
ENSG00000182197	EXT1	-0.0523377	4.84336	0.0534712
ENSG00000177733	HNRNPA0	-0.0423802	6.07547	0.0535204
ENSG00000109133	TMEM33	-0.0324947	7.00706	0.0535944
ENSG00000160446	ZDHHC12	-0.0772854	2.7167	0.0535944
ENSG00000232346	SC22CB-1E7.1	0.262002	-1.62836	0.0535944
ENSG00000272140	RP11-574K11.29	0.0854397	1.25138	0.0535944
ENSG00000153406	NMRAL1	-0.0595024	4.03275	0.0536079
ENSG00000154122	ANKH	0.09498	5.93835	0.0536079
ENSG00000170260	ZNF212	-0.0407486	3.83625	0.0536079
ENSG00000170734	POLH	0.0365128	4.67308	0.0536079
ENSG00000183475	ASB7	-0.0265904	5.52507	0.0536079
ENSG00000250508	RP11-757G1.6	0.211492	-1.88619	0.0536079
ENSG00000259818	RP5-1024G6.7	0.18713	-2.25454	0.0536079
ENSG00000270640	RP11-373D23.2	-0.0812367	2.18578	0.0536079
ENSG00000079308	TNS1	0.181387	7.66388	0.05363
ENSG00000136807	CDK9	-0.031086	5.50234	0.05363
ENSG00000179044	EXOC3L1	-0.193815	-0.833662	0.05363
ENSG00000275210	AC008984.2	-0.105846	2.12692	0.0537374
ENSG00000276757	Metazoa_SRP	0.183016	-1.93571	0.0537374
ENSG00000171488	LRRC8C	0.0401708	6.7765	0.0538506
ENSG00000022840	RNF10	0.123059	9.05504	0.0538652
ENSG00000133639	BTG1	-0.0399868	7.89464	0.0538652
ENSG00000269556	TMEM185A	-0.0488569	3.50597	0.0539053
ENSG00000105856	HBP1	-0.0341042	7.84295	0.0539532
ENSG00000122378	FAM213A	-0.0937864	1.83209	0.054066
ENSG00000167461	RAB8A	-0.0371875	6.11822	0.0542509
ENSG00000167792	NDUFV1	-0.0433458	5.34785	0.0542509
ENSG00000258831	RP11-76E17.4	-0.184456	0.512195	0.0544195
ENSG00000096996	IL12RB1	-0.053225	4.66919	0.0545968
ENSG00000158792	SPATA2L	-0.0796862	2.26934	0.0545968
ENSG00000169217	CD2BP2	-0.0394308	5.93819	0.0545968
ENSG00000125810	CD93	-0.072943	8.47394	0.054623
ENSG00000183765	CHEK2	0.0580136	2.74609	0.0547547
ENSG00000111481	COPZ1	0.0340049	5.65613	0.0547782
ENSG00000130997	POLN	0.0944492	0.895768	0.0547782
ENSG00000159692	CTBP1	-0.042498	6.81271	0.0547782
ENSG00000224870	RP4-758J18.2	-0.0472562	4.31193	0.0547782
ENSG00000006534	ALDH3B1	-0.0613762	4.77307	0.054797
ENSG00000137216	TMEM63B	0.15152	5.62831	0.054797
ENSG00000162591	MEGF6	-0.0798801	4.72242	0.054797
ENSG00000115155	OTOF	-0.259951	-1.14889	0.0550424
ENSG00000260865	CTA-331F8.1	0.176688	-0.811363	0.05517
ENSG00000138430	OLA1	0.0504834	4.08405	0.0552994
ENSG00000274536	RP6-159A1.4	-0.0483641	8.10106	0.055326
ENSG00000241468	ATP5J2	0.0555956	3.19729	0.0553348
ENSG00000079332	SAR1A	-0.0287762	6.90736	0.0553478
ENSG00000166946	CCNDBP1	0.0532858	7.82537	0.0555833
ENSG00000181634	TNFSF15	0.150034	0.389042	0.0555833
ENSG00000111796	KLRB1	0.112941	4.53386	0.0556359
ENSG00000066135	KDM4A	-0.0289954	6.26198	0.0558138
ENSG00000132604	TERF2	0.0350463	4.56113	0.0558138
ENSG00000178449	COX14	0.0671646	2.84581	0.0558138
ENSG00000179934	CCR8	0.143699	1.64835	0.0558138
ENSG00000113838	TBCCD1	0.0348274	4.06638	0.0558747
ENSG00000185010	F8	0.0816962	2.27333	0.0558747
ENSG00000250290	CTC-820M8.1	0.104018	1.19324	0.0559066
ENSG00000280834	U6	0.183266	-1.77367	0.0559066
ENSG00000214293	APTR	-0.0618495	2.37769	0.056021
ENSG00000156587	UBE2L6	-0.0818303	6.12854	0.0560558
ENSG00000160993	ALKBH4	-0.0616586	2.65713	0.0560558
ENSG00000196812	ZSCAN16	-0.0523246	3.48264	0.0560558
ENSG00000197540	GZMM	-0.100442	3.69757	0.0560558
ENSG00000257052	RP11-881M11.2	0.168929	-0.620155	0.0560558
ENSG00000067992	PDK3	-0.0486158	5.61984	0.0561364
ENSG00000102245	CD40LG	0.0707763	4.00177	0.0561364
ENSG00000114853	ZBTB47	-0.0697621	3.29011	0.0561364
ENSG00000119922	IFIT2	-0.127343	8.41274	0.0561364
ENSG00000131873	CHSY1	-0.0578197	6.59144	0.0561364
ENSG00000166272	WBP1L	-0.0328231	6.28427	0.0561364
ENSG00000170604	IRF2BP1	-0.0668854	3.29218	0.0561364
ENSG00000172183	ISG20	-0.0603644	6.13597	0.0561364
ENSG00000176438	SYNE3	0.0487274	7.19104	0.0561364
ENSG00000102921	N4BP1	-0.0365708	7.03218	0.0562963
ENSG00000134369	NAV1	0.0903382	2.61104	0.0562963
ENSG00000162851	TFB2M	0.0662753	2.68278	0.0562963
ENSG00000227825	SLC9A7P1	0.0724717	3.06438	0.0562963
ENSG00000132256	TRIM5	-0.056998	5.49021	0.0564912
ENSG00000185728	YTHDF3	-0.0249184	7.16297	0.0564912
ENSG00000197070	ARRDC1	-0.054059	4.7646	0.0564912
ENSG00000159314	ARHGAP27	-0.0458565	7.196	0.0565338
ENSG00000183258	DDX41	-0.0419274	5.30069	0.0566067
ENSG00000147526	TACC1	-0.032713	8.17483	0.0567051
ENSG00000166428	PLD4	-0.0936252	2.90928	0.0571159
ENSG00000173171	MTX1	-0.0525266	4.97786	0.0571177
ENSG00000254999	BRK1	0.0481392	5.86954	0.0572265
ENSG00000136522	MRPL47	0.0954991	2.86854	0.0572896
ENSG00000140332	TLE3	-0.0610629	7.22654	0.0572896
ENSG00000148840	PPRC1	0.0700961	2.97082	0.0572896
ENSG00000226445	XXyac-YX65C7_A.2	0.18426	-1.67313	0.0572896
ENSG00000237550	UBE2Q2P6	0.275994	3.00961	0.0572896
ENSG00000175182	FAM131A	-0.0487634	3.72872	0.0574317
ENSG00000175538	KCNE3	-0.0424823	7.40632	0.0577276
ENSG00000134574	DDB2	0.0458484	4.07429	0.0577324
ENSG00000227766	HCG4P5	-0.144418	0.418605	0.0577414
ENSG00000270562	RP11-154H23.3	-0.0676486	3.6316	0.0577659
ENSG00000273112	RP11-25K21.6	-0.115628	2.29099	0.0577659
ENSG00000196544	C17orf59	-0.0564482	3.84278	0.0578984
ENSG00000125482	TTF1	-0.0340166	4.75579	0.0580019
ENSG00000113558	SKP1	0.0389343	7.08696	0.0580057
ENSG00000101152	DNAJC5	-0.0420768	6.9805	0.0580333
ENSG00000165092	ALDH1A1	-0.0839594	4.79353	0.0581828
ENSG00000211893	IGHG2	-0.224574	1.82904	0.0581828
ENSG00000179950	PUF60	-0.0529039	5.65615	0.0582657
ENSG00000162694	EXTL2	-0.0729657	2.17867	0.0582929
ENSG00000121807	CCR2	0.0603105	7.37717	0.0583523
ENSG00000118689	FOXO3	0.0993448	7.95972	0.0583537
ENSG00000182983	ZNF662	-0.136918	1.05807	0.0583537
ENSG00000198643	FAM3D	-0.204938	-2.11963	0.0583537
ENSG00000233954	UQCRHL	0.118587	1.21742	0.0583702
ENSG00000177302	TOP3A	-0.0359538	5.76469	0.0584214
ENSG00000183207	RUVBL2	-0.054322	3.96848	0.0584941
ENSG00000246273	SBF2-AS1	0.0845585	1.92326	0.0584941
ENSG00000206888	RNU6-48P	-0.150458	-0.776873	0.0585064
ENSG00000171223	JUNB	-0.0722422	6.6426	0.05872
ENSG00000079335	CDC14A	0.0437343	6.32427	0.0587355
ENSG00000139832	RAB20	-0.0994641	3.05901	0.0587355
ENSG00000115128	SF3B6	0.0869341	3.80401	0.0587805
ENSG00000155966	AFF2	0.0788984	4.29326	0.0587805
ENSG00000172531	PPP1CA	-0.048787	6.49474	0.0588953
ENSG00000160445	ZER1	0.119269	6.44195	0.0589663
ENSG00000187260	WDR86	0.155194	0.245247	0.0589663
ENSG00000212664	RP11-592N21.1	0.217585	-2.26682	0.0589663
ENSG00000111231	GPN3	0.0714433	2.99989	0.0591696
ENSG00000126822	PLEKHG3	-0.062512	7.79392	0.0591696
ENSG00000158805	ZNF276	-0.0412226	6.73732	0.0591696
ENSG00000176853	FAM91A1	-0.0304407	7.15459	0.0591696
ENSG00000180185	FAHD1	0.0804539	3.42222	0.0591696
ENSG00000204264	PSMB8	-0.048091	6.99056	0.0591696
ENSG00000233609	RP11-62H7.2	0.10838	1.29478	0.0591696
ENSG00000165501	LRR1	0.0626889	3.35027	0.0593268
ENSG00000183527	PSMG1	0.0581977	2.86594	0.0593268
ENSG00000184182	UBE2F	0.0450062	4.46122	0.0593319
ENSG00000126860	EVI2A	0.148246	5.73747	0.0594651
ENSG00000224616	RTCA-AS1	0.103378	1.17217	0.0595029
ENSG00000139505	MTMR6	-0.0402532	6.74914	0.0595694
ENSG00000158470	B4GALT5	-0.0589182	7.17301	0.0595932
ENSG00000236209	AC104135.2	0.282091	-1.67065	0.059743
ENSG00000130770	ATPIF1	0.0516146	3.67781	0.05981
ENSG00000143947	RPS27A	0.103599	7.65103	0.05981
ENSG00000250361	GYPB	0.171606	4.19397	0.05981
ENSG00000128340	RAC2	-0.0443132	7.28935	0.0601418
ENSG00000273080	RP11-301O19.1	0.183488	-1.21373	0.0602673
ENSG00000144895	EIF2A	0.063948	5.94145	0.0602935
ENSG00000166912	MTMR10	-0.0365435	7.44119	0.0602935
ENSG00000183323	CCDC125	-0.0537671	5.46939	0.0602935
ENSG00000095370	SH2D3C	-0.0531918	6.15307	0.0603256
ENSG00000179761	PIPOX	-0.0671652	1.86038	0.0603256
ENSG00000132792	CTNNBL1	-0.0286046	5.37237	0.060613
ENSG00000143319	ISG20L2	-0.0280838	5.38313	0.060613
ENSG00000158104	HPD	-0.208189	-2.4494	0.060613
ENSG00000175376	EIF1AD	-0.0364725	4.3504	0.060613
ENSG00000204859	ZBTB48	-0.0462951	4.7282	0.060613
ENSG00000278195	SSTR3	-0.115406	2.14209	0.060613
ENSG00000138381	ASNSD1	0.07523	5.14442	0.060874
ENSG00000126264	HCST	-0.0612971	4.68397	0.0610039
ENSG00000134815	DHX34	-0.0547579	6.02323	0.0610039
ENSG00000136754	ABI1	-0.0242829	7.47867	0.0610039
ENSG00000257267	ZNF271P	0.049608	5.0861	0.0610039
ENSG00000000457	SCYL3	-0.028298	5.95328	0.0610095
ENSG00000185115	NDNL2	-0.0444638	4.40057	0.0610099
ENSG00000102038	SMARCA1	-0.193867	-0.956392	0.0611763
ENSG00000250321	RP11-478C6.4	0.206377	-2.42171	0.0611763
ENSG00000100104	SRRD	0.097909	5.79922	0.0613336
ENSG00000082146	STRADB	0.141253	9.27776	0.0613598
ENSG00000143702	CEP170	-0.0331067	6.66032	0.0613598
ENSG00000113384	GOLPH3	-0.027408	6.27483	0.0614881
ENSG00000008516	MMP25	-0.0882073	7.23254	0.0619177
ENSG00000275371	RP11-455F5.6	-0.129248	0.763051	0.0620133
ENSG00000172831	CES2	-0.0364051	4.43768	0.0620263
ENSG00000137970	RPL7P9	0.283102	0.644334	0.0621365
ENSG00000159496	RGL4	-0.079222	3.96481	0.0621365
ENSG00000059377	TBXAS1	-0.0410829	7.98449	0.0623498
ENSG00000163946	FAM208A	0.0366117	7.48918	0.0623498
ENSG00000077514	POLD3	-0.0373934	5.03575	0.0623998
ENSG00000062282	DGAT2	-0.0706876	7.17384	0.0624034
ENSG00000087074	PPP1R15A	-0.0536946	5.89639	0.0624034
ENSG00000198336	MYL4	0.169688	3.3314	0.0624034
ENSG00000100365	NCF4	-0.062833	6.8762	0.0625256
ENSG00000134602	STK26	-0.0378182	6.36857	0.0627265
ENSG00000168404	MLKL	-0.0368677	6.49535	0.0627265
ENSG00000175104	TRAF6	-0.0235365	5.99834	0.0627265
ENSG00000196118	C16orf93	-0.0806833	1.50705	0.0627265
ENSG00000221100	AL138706.1	-0.140878	-0.0113547	0.0627265
ENSG00000246263	KB-431C1.4	-0.0582812	4.73838	0.0627265
ENSG00000250317	SMIM20	0.0876375	2.13662	0.0627265
ENSG00000189350	FAM179A	-0.093923	2.77508	0.0627906
ENSG00000233594	BTF3P5	0.156532	-2.55283	0.0628681
ENSG00000100060	MFNG	-0.0441182	5.91612	0.062884
ENSG00000267212	CTD-2659N19.9	-0.125922	0.00420981	0.0629467
ENSG00000148180	GSN	-0.0718764	6.72213	0.0630843
ENSG00000106477	CEP41	-0.05138	3.09674	0.0631679
ENSG00000159346	ADIPOR1	0.118996	10.4821	0.0633099
ENSG00000146463	ZMYM4	0.0332339	5.71856	0.0633157
ENSG00000133317	LGALS12	-0.0843849	3.04742	0.0636109
ENSG00000213090	AC007256.5	0.0750709	3.21605	0.0636211
ENSG00000242951	RP11-507E23.1	0.19675	-2.52118	0.0636211
ENSG00000107643	MAPK8	-0.0357388	5.5886	0.0637034
ENSG00000171302	CANT1	-0.0497715	5.91603	0.0637034
ENSG00000139644	TMBIM6	-0.027145	9.42987	0.0637196
ENSG00000107201	DDX58	-0.0793592	7.6234	0.0637998
ENSG00000156875	HIAT1	-0.0274794	6.43076	0.0639136
ENSG00000134852	CLOCK	0.0441822	5.0839	0.063986
ENSG00000079974	RABL2B	0.0625265	2.36397	0.0640226
ENSG00000125375	ATP5S	0.0461626	5.0187	0.0640226
ENSG00000184060	ADAP2	0.051128	3.69463	0.0641063
ENSG00000152213	ARL11	-0.0402535	6.16817	0.0641132
ENSG00000227034	RP11-234N17.1	0.184175	-2.37686	0.0641132
ENSG00000236008	AC011747.4	-0.10967	1.4783	0.0641132
ENSG00000278047	FP671120.6	0.165803	1.66006	0.0641132
ENSG00000013364	MVP	-0.0532365	7.70574	0.0641449
ENSG00000073614	KDM5A	-0.0263857	8.87648	0.0642421
ENSG00000155659	VSIG4	-0.158362	1.31547	0.0642421
ENSG00000174851	YIF1A	-0.0575658	3.25099	0.0642421
ENSG00000130429	ARPC1B	-0.0411053	7.88421	0.0645481
ENSG00000204764	RANBP17	0.146958	0.756719	0.0645926
ENSG00000270558	CTD-2124B8.2	-0.168547	-1.14529	0.064654
ENSG00000100697	DICER1	-0.0385675	8.65301	0.0647289
ENSG00000029534	ANK1	0.165336	6.46402	0.0647997
ENSG00000160932	LY6E	-0.140227	4.78313	0.0649753
ENSG00000131089	ARHGEF9	-0.0375203	4.5433	0.0650697
ENSG00000100532	CGRRF1	0.062823	3.38535	0.0651997
ENSG00000168802	CHTF8	-0.0338153	6.22916	0.0651997
ENSG00000099282	TSPAN15	0.133994	0.441481	0.0653394
ENSG00000237637	FRY-AS1	-0.0902967	0.983813	0.0658369
ENSG00000110619	CARS	-0.0281121	6.11762	0.0660438
ENSG00000159461	AMFR	0.0614252	6.78654	0.0662653
ENSG00000166797	FAM96A	0.0674228	4.24552	0.0662817
ENSG00000060138	YBX3	0.131896	8.9668	0.0663008
ENSG00000177156	TALDO1	-0.0617841	8.56692	0.0663008
ENSG00000137393	RNF144B	-0.0453234	6.92793	0.0664247
ENSG00000116396	KCNC4	0.0977347	2.69523	0.0667004
ENSG00000236792	RP11-142L4.2	0.137719	-2.81178	0.0669743
ENSG00000171161	ZNF672	-0.0372364	4.81697	0.0669854
ENSG00000275704	FP565210.1	0.176505	-1.1479	0.0669854
ENSG00000108239	TBC1D12	0.0687829	3.2206	0.06709
ENSG00000248333	CDK11B	-0.0399407	4.55705	0.06709
ENSG00000137547	MRPL15	0.0736603	2.99371	0.067177
ENSG00000154188	ANGPT1	-0.118368	3.1347	0.067177
ENSG00000155893	PXYLP1	-0.0539597	4.33129	0.067277
ENSG00000204842	ATXN2	0.060111	5.15193	0.067277
ENSG00000100439	ABHD4	-0.0562773	4.69409	0.0675871
ENSG00000109790	KLHL5	0.0453035	5.57365	0.0675871
ENSG00000175352	NRIP3	0.138898	0.589064	0.0675871
ENSG00000251002	AE000661.37	-0.0934351	2.11521	0.0675871
ENSG00000258608	DNAJC19P9	0.170663	-2.37631	0.0675871
ENSG00000247596	TWF2	-0.0595755	5.37909	0.0676454
ENSG00000149925	ALDOA	-0.0544727	7.7014	0.0676791
ENSG00000143367	TUFT1	-0.0780218	2.28875	0.0678754
ENSG00000241258	CRCP	-0.0290828	4.84991	0.0678994
ENSG00000112308	C6orf62	0.0280851	8.41547	0.0679183
ENSG00000100442	FKBP3	0.0666841	3.89967	0.0679259
ENSG00000161813	LARP4	0.0389344	5.36999	0.0679259
ENSG00000129315	CCNT1	-0.025417	6.49001	0.0679427
ENSG00000230149	RP3-508I15.19	-0.127537	0.0830164	0.0681267
ENSG00000101246	ARFRP1	-0.0425932	5.39951	0.0682162
ENSG00000147394	ZNF185	-0.0925834	5.29923	0.068297
ENSG00000138032	PPM1B	-0.0293511	6.95779	0.0683201
ENSG00000242372	EIF6	-0.0520635	4.76515	0.0683644
ENSG00000006712	PAF1	-0.0455603	4.49005	0.068426
ENSG00000138964	PARVG	-0.0379398	7.33132	0.0686522
ENSG00000142233	NTN5	-0.17594	-2.3535	0.0686522
ENSG00000197111	PCBP2	0.0596412	6.82329	0.0686799
ENSG00000130338	TULP4	0.0442475	5.42042	0.0688251
ENSG00000173153	ESRRA	-0.0461228	4.93947	0.0688722
ENSG00000187109	NAP1L1	0.0455597	7.25799	0.0688723
ENSG00000226328	NUP50-AS1	-0.066433	4.12034	0.0690946
ENSG00000175600	SUGCT	-0.116417	0.434948	0.0692345
ENSG00000226564	FTH1P20	0.207469	-1.33998	0.0692345
ENSG00000221643	SNORA77	0.164486	-0.876021	0.0692903
ENSG00000042429	MED17	-0.0242366	6.04676	0.0693921
ENSG00000204614	TRIM40	-0.197224	-0.529983	0.0693921
ENSG00000214485	RPL7P1	0.28543	-0.516844	0.0693921
ENSG00000256673	RP11-599J14.2	0.188629	-1.88414	0.0693958
ENSG00000111674	ENO2	0.0580307	3.7843	0.0695179
ENSG00000253200	RP11-582J16.5	-0.0522382	3.84987	0.0695179
ENSG00000261997	RP11-212I21.4	-0.0732075	4.0595	0.0695179
ENSG00000204463	BAG6	0.0942214	6.18453	0.0695465
ENSG00000107758	PPP3CB	0.0414672	5.67422	0.0697518
ENSG00000162512	SDC3	-0.16232	-0.304635	0.0697518
ENSG00000279162	CTD-3126B10.2	-0.101619	0.826552	0.0698817
ENSG00000119227	PIGZ	0.127931	-0.250305	0.0700886
ENSG00000187010	RHD	0.294892	1.00894	0.0700896
ENSG00000113141	IK	-0.0347696	7.029	0.070348
ENSG00000158825	CDA	-0.0878992	3.78293	0.0704169
ENSG00000123901	GPR83	-0.182156	-2.32636	0.0704753
ENSG00000126106	TMEM53	-0.0919723	0.751197	0.0704753
ENSG00000085491	SLC25A24	0.0458219	5.72194	0.0705031
ENSG00000111652	COPS7A	-0.0330561	4.39788	0.0705031
ENSG00000137073	UBAP2	0.0690401	5.75646	0.0705031
ENSG00000241478	HSPA8P9	0.200741	-2.2863	0.0706143
ENSG00000141933	TPGS1	-0.0559874	3.0953	0.0707079
ENSG00000177283	FZD8	-0.185549	-1.70369	0.070763
ENSG00000135723	FHOD1	0.0613882	3.40988	0.0708482
ENSG00000101986	ABCD1	-0.0688659	2.99252	0.0708722
ENSG00000101084	C20orf24	-0.0488022	3.83316	0.0710216
ENSG00000122406	RPL5	0.0918688	8.22939	0.0710868
ENSG00000125037	EMC3	0.0879964	6.75461	0.0711043
ENSG00000161800	RACGAP1	0.0454621	3.59479	0.0711291
ENSG00000123342	MMP19	0.186867	-2.06157	0.0712107
ENSG00000181789	COPG1	-0.0338481	6.79911	0.0714231
ENSG00000154767	XPC	-0.0345086	6.76079	0.0715188
ENSG00000169607	CKAP2L	0.15051	0.0124431	0.0715188
ENSG00000226525	RPS7P10	0.244962	-1.93467	0.0716735
ENSG00000025708	TYMP	-0.0741321	6.97562	0.0720478
ENSG00000117335	CD46	-0.0367157	9.19464	0.0720478
ENSG00000140525	FANCI	0.0462759	3.95719	0.0724707
ENSG00000123975	CKS2	0.138512	0.650973	0.0725972
ENSG00000129245	FXR2	-0.0391831	4.90534	0.0725972
ENSG00000182957	SPATA13	-0.0288352	7.42529	0.0725972
ENSG00000270426	RP11-326I11.5	-0.0479842	4.25037	0.0726207
ENSG00000236360	RP11-334A14.2	0.17647	-2.22463	0.0727048
ENSG00000197256	KANK2	0.18256	2.83128	0.072893
ENSG00000276797	MIR24-2	-0.173863	-1.68416	0.0729031
ENSG00000256020	RP5-1154L15.2	0.230795	0.285774	0.0729286
ENSG00000105011	ASF1B	-0.0965155	2.78971	0.0730657
ENSG00000070501	POLB	-0.0479849	4.91576	0.073077
ENSG00000071564	TCF3	0.0755587	4.5469	0.073077
ENSG00000125458	NT5C	-0.0574395	3.38941	0.073077
ENSG00000126522	ASL	-0.0643967	2.86986	0.073077
ENSG00000125991	ERGIC3	0.0370242	4.79918	0.0731929
ENSG00000033100	CHPF2	-0.0384851	5.57129	0.0732758
ENSG00000238227	C9orf69	-0.0483697	5.08037	0.073316
ENSG00000132824	SERINC3	-0.0245708	7.43208	0.0733609
ENSG00000103047	TANGO6	0.0275669	5.58411	0.0734497
ENSG00000105771	SMG9	0.0488631	3.69677	0.0734497
ENSG00000165392	WRN	0.0386464	4.92502	0.0734497
ENSG00000158473	CD1D	-0.0502575	5.35948	0.073512
ENSG00000100453	GZMB	-0.113874	5.72714	0.0737813
ENSG00000259366	CTD-2647L4.4	0.13914	1.0488	0.0737813
ENSG00000068903	SIRT2	-0.0460243	4.58483	0.0738148
ENSG00000156509	FBXO43	0.18791	-2.06319	0.0739231
ENSG00000172819	RARG	0.05591	3.24523	0.0739567
ENSG00000149573	MPZL2	-0.0784186	3.37999	0.0740438
ENSG00000254362	RP11-14I17.3	-0.10341	0.806947	0.0740438
ENSG00000104915	STX10	-0.0501101	5.62738	0.0744909
ENSG00000162522	KIAA1522	0.166246	-0.89076	0.074518
ENSG00000176896	TCEANC	0.056179	4.44119	0.074518
ENSG00000224895	VPS26BP1	0.168415	-1.00389	0.074518
ENSG00000226471	CTA-292E10.6	0.0687906	2.05273	0.074518
ENSG00000232546	RP11-458F8.1	0.151515	-0.560743	0.074518
ENSG00000273415	RP11-702B10.2	0.187608	-2.03042	0.074518
ENSG00000163249	CCNYL1	0.0412884	3.93915	0.0747046
ENSG00000100297	MCM5	-0.0403186	5.35047	0.0751704
ENSG00000153827	TRIP12	0.0326813	9.0962	0.0751704
ENSG00000186468	RPS23	0.081905	8.01752	0.075209
ENSG00000186522	2021-09-10	0.0814915	1.96223	0.0753128
ENSG00000067560	RHOA	-0.0309235	8.94596	0.0756969
ENSG00000163513	TGFBR2	-0.025754	8.85229	0.0758522
ENSG00000197037	ZSCAN25	-0.0300769	5.27328	0.0758522
ENSG00000264350	SNRPGP2	0.209569	-2.02667	0.0758522
ENSG00000272669	RP3-508I15.21	-0.0978837	1.11609	0.0758644
ENSG00000069956	MAPK6	0.0431851	4.81673	0.0759289
ENSG00000188559	RALGAPA2	-0.0449248	7.79749	0.0760486
ENSG00000156170	NDUFAF6	0.0459758	3.26438	0.0761222
ENSG00000126709	IFI6	-0.16811	5.17478	0.0762796
ENSG00000231747	AC079922.2	0.194314	-1.96753	0.0765106
ENSG00000118680	MYL12B	0.0545431	7.50363	0.0765425
ENSG00000205784	ARRDC5	-0.0617871	2.81017	0.0765981
ENSG00000145431	PDGFC	0.0816251	2.52342	0.0766031
ENSG00000063322	MED29	-0.0297193	4.83257	0.0767727
ENSG00000142534	RPS11	0.07329	9.14654	0.0769907
ENSG00000177370	TIMM22	-0.0388076	3.83239	0.0772193
ENSG00000233875	RP11-61L14.6	-0.0998095	1.14254	0.0772193
ENSG00000253421	ZNHIT1P1	-0.193834	-1.98801	0.0772193
ENSG00000264801	ERVFRD-3	0.16766	-1.53686	0.0772193
ENSG00000013275	PSMC4	-0.0395538	5.42375	0.0773519
ENSG00000088766	CRLS1	0.0430758	4.43193	0.0773519
ENSG00000196227	FAM217B	-0.0312698	5.52442	0.0773519
ENSG00000143549	TPM3	-0.025639	8.86675	0.0775187
ENSG00000158555	GDPD5	0.0860392	3.64356	0.0775187
ENSG00000206177	HBM	0.185706	4.12442	0.0775187
ENSG00000260549	MT1L	0.260476	-0.394341	0.0775187
ENSG00000102178	UBL4A	-0.0478924	4.67104	0.0776389
ENSG00000103275	UBE2I	-0.0267958	6.26892	0.077698
ENSG00000179262	RAD23A	0.107787	4.77321	0.077698
ENSG00000105643	ARRDC2	-0.0380518	5.90173	0.0778148
ENSG00000198911	SREBF2	0.0586748	4.82745	0.0778148
ENSG00000275074	NUDT18	-0.061699	3.25011	0.0778642
ENSG00000166819	PLIN1	-0.179174	-1.94662	0.0779198
ENSG00000236577	SNRPGP14	0.145519	-0.69618	0.0779198
ENSG00000118412	CASP8AP2	0.0622594	6.23953	0.0780946
ENSG00000131966	ACTR10	0.0400134	5.31921	0.0780946
ENSG00000156411	C14orf2	0.083808	3.93846	0.0780946
ENSG00000258659	TRIM34	-0.13326	-0.327479	0.0785914
ENSG00000166888	STAT6	-0.0398768	8.36514	0.0786754
ENSG00000108953	YWHAE	0.0317464	4.97587	0.0787281
ENSG00000118454	ANKRD13C	0.0385605	4.8505	0.0787281
ENSG00000136929	HEMGN	0.152044	7.0154	0.0787281
ENSG00000249309	RP11-153M7.5	0.120936	1.71592	0.0788
ENSG00000180549	FUT7	-0.0757297	3.98869	0.0788627
ENSG00000143337	TOR1AIP1	-0.0265471	7.49902	0.0789141
ENSG00000148572	NRBF2	-0.0455933	6.48458	0.0790203
ENSG00000162813	BPNT1	0.0467389	3.64837	0.0790203
ENSG00000257017	HP	0.176471	1.98028	0.0790203
ENSG00000142102	ATHL1	-0.0724653	6.61555	0.0790301
ENSG00000250305	KIAA1456	0.191373	-1.48054	0.0791512
ENSG00000163444	TMEM183A	0.0420288	5.79287	0.0791742
ENSG00000120029	C10orf76	0.02889	5.34689	0.0792234
ENSG00000166446	CDYL2	0.0608204	3.79993	0.079312
ENSG00000111339	ART4	0.202348	-1.44384	0.0793174
ENSG00000162227	TAF6L	-0.0555142	2.80721	0.079334
ENSG00000163904	SENP2	-0.028273	5.34171	0.079377
ENSG00000172216	CEBPB	-0.0540654	6.22602	0.079377
ENSG00000258731	RP11-547D23.1	0.11499	0.3849	0.0795264
ENSG00000184867	ARMCX2	-0.0809906	1.75873	0.0796174
ENSG00000161204	ABCF3	-0.0323996	5.07727	0.07989
ENSG00000178694	NSUN3	0.0607341	5.86723	0.07989
ENSG00000200394	SNORA38B	0.16316	0.189669	0.07989
ENSG00000236760	AC019118.3	0.168252	-2.31254	0.07989
ENSG00000136270	TBRG4	-0.0426805	5.47151	0.079928
ENSG00000270062	RP11-248J18.3	-0.0673888	2.30479	0.079928
ENSG00000104218	CSPP1	0.0406951	4.37038	0.0799924
ENSG00000057252	SOAT1	-0.0306064	6.66619	0.0800691
ENSG00000163634	THOC7	0.0587849	3.7269	0.0800977
ENSG00000104324	CPQ	-0.0427162	7.06013	0.0801525
ENSG00000166033	HTRA1	0.1999	-0.691672	0.0801525
ENSG00000199135	MIR101-1	-0.0722288	1.82128	0.0802093
ENSG00000168237	GLYCTK	-0.0484557	4.08689	0.0802144
ENSG00000133997	MED6	-0.034917	4.76873	0.080362
ENSG00000261884	CTC-479C5.12	-0.0508544	3.59234	0.080362
ENSG00000101439	CST3	-0.0664887	6.27423	0.0804685
ENSG00000119636	CCDC176	0.140262	4.45864	0.0804685
ENSG00000164123	C4orf45	0.214412	-1.49418	0.0808413
ENSG00000170860	LSM3	0.0723701	2.87528	0.0809011
ENSG00000250138	RP11-848G14.5	0.202576	0.41503	0.0812196
ENSG00000164047	CAMP	0.162733	3.24962	0.0812351
ENSG00000165030	NFIL3	-0.0548489	5.64243	0.0812351
ENSG00000176476	CCDC101	-0.0490765	3.61533	0.0812351
ENSG00000267169	CTB-55O6.12	-0.0533386	2.71468	0.0812493
ENSG00000119535	CSF3R	-0.0616401	10.4692	0.0815341
ENSG00000185896	LAMP1	-0.0441468	6.68654	0.0815907
ENSG00000238083	LRRC37A2	0.0873964	3.91292	0.0815907
ENSG00000237037	NDUFA6-AS1	0.0668615	1.8255	0.0819364
ENSG00000113119	TMCO6	-0.0400704	3.99178	0.0820058
ENSG00000146054	TRIM7	0.109353	0.806115	0.0821421
ENSG00000141293	SKAP1	0.0491161	4.85166	0.0822588
ENSG00000184702	2021-09-05	-0.113916	3.10008	0.0824403
ENSG00000234389	AC007278.3	-0.139954	3.78066	0.0824403
ENSG00000124313	IQSEC2	0.0831991	1.62017	0.0827012
ENSG00000136542	GALNT5	0.169664	1.35895	0.0827012
ENSG00000138182	KIF20B	0.0732195	3.973	0.0827012
ENSG00000156504	FAM122B	0.0531828	4.43934	0.0828789
ENSG00000105401	CDC37	-0.0447846	6.33923	0.0830364
ENSG00000183018	SPNS2	-0.124854	0.243374	0.0831481
ENSG00000171552	BCL2L1	0.136036	8.8946	0.0832179
ENSG00000211459	MT-RNR1	0.133491	7.59647	0.0832351
ENSG00000120913	PDLIM2	-0.0450707	5.20363	0.0833637
ENSG00000073792	IGF2BP2	0.150751	5.3091	0.0833912
ENSG00000143751	SDE2	-0.0343501	5.69218	0.08349
ENSG00000232953	HSPA8P18	0.197367	-0.505129	0.0835439
ENSG00000164938	TP53INP1	-0.0389271	7.69916	0.0837118
ENSG00000103091	WDR59	0.0364377	5.04944	0.083916
ENSG00000207137	SNORD116-13	0.156644	-0.423598	0.0840572
ENSG00000163606	CD200R1	0.057477	4.43101	0.0841366
ENSG00000124614	RPS10	0.101305	3.92208	0.0842104
ENSG00000156886	ITGAD	0.1816	-0.336885	0.0842104
ENSG00000085449	WDFY1	-0.0358655	6.59667	0.0843943
ENSG00000196323	ZBTB44	0.0310487	7.16609	0.0843943
ENSG00000181029	TRAPPC5	-0.05406	3.4142	0.08441
ENSG00000204634	TBC1D8	-0.0580712	4.97241	0.0848814
ENSG00000105404	RABAC1	-0.0550272	4.39866	0.0849105
ENSG00000130560	UBAC1	0.0487898	4.95293	0.0849149
ENSG00000132434	LANCL2	-0.0399086	3.4132	0.0849149
ENSG00000231966	RP11-12M5.4	0.174935	-2.15056	0.0849149
ENSG00000256968	SNRPEP2	0.162293	-2.54501	0.0849149
ENSG00000128973	CLN6	-0.0649194	3.68894	0.0851581
ENSG00000275888	RP13-516M14.10	-0.086961	1.37801	0.085713
ENSG00000252206	RNU7-40P	-0.182811	-1.93284	0.0857438
ENSG00000181544	FANCB	0.0641534	2.79319	0.0862767
ENSG00000135480	KRT7	0.180959	-2.38235	0.0863647
ENSG00000175061	LRRC75A-AS1	0.088198	6.51611	0.0863647
ENSG00000101752	MIB1	0.032362	6.92664	0.0864566
ENSG00000112210	RAB23	0.108633	0.855774	0.0864566
ENSG00000136048	DRAM1	0.0476019	4.24442	0.0864566
ENSG00000153391	INO80C	-0.0453843	2.79007	0.0864566
ENSG00000166189	HPS6	-0.0502762	4.20699	0.0864566
ENSG00000197555	SIPA1L1	-0.0542923	7.58904	0.0864566
ENSG00000205664	RP11-706O15.1	0.0572603	2.70695	0.0864566
ENSG00000170445	HARS	-0.0243042	5.36597	0.0864597
ENSG00000171928	TVP23B	0.0487319	4.2739	0.0864597
ENSG00000144045	DQX1	-0.164776	-1.25883	0.086496
ENSG00000279294	RP11-274A11.3	-0.0805287	2.09722	0.0866384
ENSG00000163346	PBXIP1	-0.0497831	7.89965	0.0866928
ENSG00000115355	CCDC88A	0.044681	6.42601	0.0868037
ENSG00000092853	CLSPN	0.0924574	1.52178	0.0869468
ENSG00000169583	CLIC3	-0.136667	0.310717	0.0869468
ENSG00000119969	HELLS	0.0671122	3.59307	0.0869696
ENSG00000102699	PARP4	-0.0308112	7.69741	0.0870629
ENSG00000108424	KPNB1	-0.0256571	8.08101	0.0870629
ENSG00000171723	GPHN	0.065761	2.51006	0.0870629
ENSG00000174444	RPL4	0.0858654	9.54603	0.0870629
ENSG00000225643	RP11-70P17.1	0.151105	-0.960082	0.0871603
ENSG00000234093	RPS15AP11	0.184277	-2.4386	0.0871661
ENSG00000269825	CTD-3099C6.9	0.053675	3.3295	0.0872138
ENSG00000256714	RP11-73M14.1	0.210125	-2.74004	0.0875573
ENSG00000269981	RP11-34P13.16	0.2063	-2.13407	0.0875741
ENSG00000280181	RP11-629N8.4	-0.0818334	1.3745	0.0886171
ENSG00000008517	IL32	0.0585154	4.61351	0.088674
ENSG00000108389	MTMR4	-0.0268852	6.36707	0.088674
ENSG00000122958	VPS26A	0.0426042	4.96735	0.088674
ENSG00000168101	NUDT16L1	-0.0501324	3.82501	0.088727
ENSG00000112146	FBXO9	0.0744991	7.00102	0.0887363
ENSG00000166441	RPL27A	0.0763797	8.09826	0.0887368
ENSG00000235174	RPL39P3	0.294377	0.170383	0.0888213
ENSG00000133612	AGAP3	0.052337	3.3451	0.088944
ENSG00000165115	KIF27	-0.0633828	5.1089	0.0897425
ENSG00000177981	ASB8	-0.0235944	5.74378	0.0897425
ENSG00000213639	PPP1CB	0.0562507	7.65467	0.0897425
ENSG00000053524	MCF2L2	0.0879676	3.01903	0.0899306
ENSG00000102760	RGCC	0.0786462	4.99723	0.0899306
ENSG00000166710	B2M	0.0859972	11.9435	0.0899306
ENSG00000182518	FAM104B	0.0845969	1.97507	0.0899306
ENSG00000183684	ALYREF	-0.0466993	4.20415	0.0899306
ENSG00000185298	CCDC137	-0.0454457	3.42524	0.0900269
ENSG00000138463	DIRC2	-0.0487658	5.34744	0.0901074
ENSG00000162927	PUS10	-0.0460687	3.96995	0.0901074
ENSG00000235908	RHOA-IT1	-0.0879946	0.790508	0.0901927
ENSG00000112782	CLIC5	0.0708313	2.65078	0.0904831
ENSG00000166813	KIF7	-0.176075	-2.26221	0.0904831
ENSG00000155906	RMND1	0.0473522	3.25328	0.0911842
ENSG00000236030	LINC01036	0.178999	-0.253161	0.0911842
ENSG00000064102	ASUN	0.0392025	4.55436	0.0912441
ENSG00000236269	ENO1-IT1	0.098895	0.415558	0.0913024
ENSG00000273183	RP11-5C23.2	-0.0850878	0.763794	0.0913024
ENSG00000215305	VPS16	-0.0384884	5.28558	0.0913262
ENSG00000129244	ATP1B2	0.205748	-1.02476	0.0914539
ENSG00000155329	ZCCHC10	0.0908697	2.79758	0.0915359
ENSG00000253873	PCDHGA11	-0.152089	0.639434	0.0916935
ENSG00000075234	TTC38	-0.0750564	4.96858	0.091715
ENSG00000123983	ACSL3	-0.0353783	5.66673	0.091715
ENSG00000134247	PTGFRN	0.108748	0.846533	0.091715
ENSG00000177125	ZBTB34	-0.0306085	7.12376	0.091715
ENSG00000227776	AKR1D1P1	0.16449	-0.988216	0.091715
ENSG00000273038	RP11-479G22.8	0.0842275	2.01256	0.091715
ENSG00000123124	WWP1	0.0406209	6.18458	0.0917998
ENSG00000126561	STAT5A	-0.0427215	6.99353	0.0917998
ENSG00000177239	MAN1B1	-0.0381077	5.56181	0.0917998
[truncated: 19,638 more rows]

## Sheet: SE vs. RRS
Ensembl gene ID	HUGO gene symbol	Log fold change	Average expression	FDR
ENSG00000154165	GPR15	0.428287	4.32812	6.90978e-06
ENSG00000149534	MS4A2	0.576181	1.97649	2.83411e-05
ENSG00000137941	TTLL7	0.322202	1.01712	0.000126052
ENSG00000169224	GCSAML	0.392998	1.55384	0.000699678
ENSG00000131016	AKAP12	0.49828	3.05701	0.000980482
ENSG00000246363	RP11-13A1.1	0.428777	0.88368	0.0012548
ENSG00000135775	COG2	-0.0559506	5.5284	0.00158773
ENSG00000140287	HDC	0.499738	3.03056	0.00158773
ENSG00000176124	DLEU1	-0.225465	2.83842	0.00158773
ENSG00000257156	RP11-13A1.3	0.429163	-0.1519	0.00158773
ENSG00000261055	RP11-195M16.3	0.277474	0.296289	0.00158773
ENSG00000211875	TRAJ14	-0.174898	2.50618	0.00227593
ENSG00000105855	ITGB8	0.465446	1.76124	0.00236826
ENSG00000178538	CA8	0.328725	1.39863	0.00236826
ENSG00000211858	TRAJ31	-0.16497	2.26347	0.00236826
ENSG00000225302	RP11-539I5.1	-0.382049	-0.196764	0.00236826
ENSG00000169031	COL4A3	-0.339406	1.92517	0.00353661
ENSG00000149516	MS4A3	0.348495	2.39308	0.00364565
ENSG00000019991	HGF	0.117502	4.08732	0.00384376
ENSG00000233864	TTTY15	-0.0905994	0.465082	0.00384376
ENSG00000211876	TRAJ13	-0.156138	2.79386	0.00390847
ENSG00000163751	CPA3	0.428985	2.53428	0.00404923
ENSG00000081181	ARG2	0.313079	0.667108	0.00510066
ENSG00000166405	RIC3	-0.152634	4.54636	0.00510066
ENSG00000137462	TLR2	0.122426	8.57101	0.00543691
ENSG00000211850	TRAJ39	-0.165181	2.08843	0.00543691
ENSG00000255733	IFNG-AS1	-0.195749	3.56549	0.00605771
ENSG00000211870	TRAJ19	-0.150983	2.75816	0.00621067
ENSG00000184371	CSF1	0.161118	2.5383	0.00650492
ENSG00000198833	UBE2J1	0.105193	7.13476	0.0066948
ENSG00000133477	FAM83F	0.340851	0.242101	0.00717908
ENSG00000211851	TRAJ38	-0.151496	2.35567	0.00854586
ENSG00000270049	RP11-297D21.4	0.104752	2.85139	0.00854586
ENSG00000263786	RP11-649A18.4	-0.253185	-0.127075	0.00863348
ENSG00000172915	NBEA	-0.175695	3.72639	0.0092857
ENSG00000211849	TRAJ40	-0.169753	1.90152	0.00955123
ENSG00000076864	RAP1GAP	0.717235	1.8501	0.0098655
ENSG00000154269	ENPP3	0.313847	1.39064	0.0098655
ENSG00000211865	TRAJ24	-0.143415	2.29926	0.0098655
ENSG00000251637	RP11-119D9.1	-0.241398	0.622166	0.0098655
ENSG00000166503	HDGFRP3	0.20002	3.02416	0.0101925
ENSG00000281128	PTENP1-AS	0.395249	-1.81452	0.0101925
ENSG00000166707	ZCCHC18	-0.171051	1.60896	0.0110526
ENSG00000179088	C12orf42	-0.153292	2.90079	0.0114163
ENSG00000163106	HPGDS	0.375957	-1.7136	0.0126522
ENSG00000117090	SLAMF1	-0.0951098	4.96672	0.0133194
ENSG00000064225	ST3GAL6	0.102316	5.03114	0.014397
ENSG00000144645	OSBPL10	-0.244638	3.96536	0.0150593
ENSG00000159388	BTG2	-0.0815235	6.31437	0.0150593
ENSG00000249274	PDLIM1P4	0.13843	1.98611	0.0150745
ENSG00000179348	GATA2	0.370976	2.6532	0.0153603
ENSG00000113520	IL4	0.39736	-1.72173	0.0156279
ENSG00000276699	TRAJ36	-0.164329	1.90698	0.0159365
ENSG00000135763	URB2	-0.0699214	4.21213	0.0160186
ENSG00000167613	LAIR1	0.0741943	6.25111	0.0176981
ENSG00000179639	FCER1A	0.253977	4.42457	0.0179742
ENSG00000147364	FBXO25	-0.0696902	4.79816	0.020791
ENSG00000124641	MED20	0.0574164	4.10779	0.021415
ENSG00000198400	NTRK1	0.362507	-1.16686	0.0233376
ENSG00000134827	TCN1	0.234058	2.90282	0.025678
ENSG00000174611	KY	0.263593	-0.477705	0.0260495
ENSG00000158715	SLC45A3	0.28181	2.15278	0.0266288
ENSG00000241859	KALP	-0.123706	-0.641471	0.0266288
ENSG00000110665	C11orf21	0.0849424	6.64531	0.0268242
ENSG00000054392	HHAT	-0.126335	2.91748	0.0282433
ENSG00000143365	RORC	-0.236802	1.95025	0.0282433
ENSG00000273983	HIST1H3G	0.248709	2.10244	0.0282433
ENSG00000179023	KLHDC7A	0.411393	-2.00221	0.0283951
ENSG00000211877	TRAJ12	-0.127214	2.85881	0.0286948
ENSG00000085840	ORC1	0.17913	0.695392	0.0296764
ENSG00000117322	CR2	-0.2297	2.85751	0.0296764
ENSG00000196415	PRTN3	0.351848	-2.4329	0.0296764
ENSG00000211662	IGLV3-21	0.36873	1.42349	0.0296764
ENSG00000176890	TYMS	0.294417	-0.582454	0.0300029
ENSG00000135469	COQ10A	-0.0860721	2.76594	0.0302531
ENSG00000112782	CLIC5	-0.134258	2.65078	0.0317368
ENSG00000211886	TRAJ3	-0.145131	1.83441	0.0321352
ENSG00000010361	FUZ	0.105322	3.14285	0.0332466
ENSG00000145246	ATP10D	0.0747997	6.03891	0.033466
ENSG00000124882	EREG	-0.321403	0.373624	0.0335693
ENSG00000260947	RP11-384P7.7	0.354214	-0.0753042	0.0335693
ENSG00000179542	SLITRK4	0.143914	2.68746	0.0336926
ENSG00000274922	RP11-88E10.5	0.0948088	3.55642	0.0336926
ENSG00000206531	CD200R1L	0.362954	-2.34406	0.0347976
ENSG00000116455	WDR77	-0.0615538	4.05401	0.0359108
ENSG00000135698	MPHOSPH6	-0.0954743	3.60567	0.0362815
ENSG00000141404	GNAL	0.238278	1.09256	0.0382354
ENSG00000105971	CAV2	0.326353	0.0264785	0.0383387
ENSG00000188107	EYS	0.172523	1.14829	0.0383387
ENSG00000211841	TRAJ48	-0.159612	1.54766	0.0386429
ENSG00000103066	PLA2G15	0.106776	2.46019	0.0394468
ENSG00000168280	KIF5C	-0.128528	3.59637	0.0439753
ENSG00000276368	HIST1H2AJ	0.237126	1.37074	0.0439753
ENSG00000110841	PPFIBP1	-0.137962	2.15508	0.0453866
ENSG00000278661	TRAJ37	-0.143879	1.96226	0.0453866
ENSG00000050628	PTGER3	0.309263	-0.525787	0.0453898
ENSG00000010671	BTK	0.0578419	6.67678	0.0464175
ENSG00000211856	TRAJ33	-0.13712	2.12267	0.0473232
ENSG00000163629	PTPN13	-0.157949	3.63096	0.048631
ENSG00000126217	MCF2L	-0.12949	2.50032	0.0489624
ENSG00000266671	AL450063.1	-0.172929	0.785957	0.0497193
ENSG00000260306	RP11-645C24.5	-0.223128	0.486517	0.0532762
ENSG00000085491	SLC25A24	0.0745438	5.72194	0.055241
ENSG00000181016	LSMEM1	-0.113206	3.3525	0.0553996
ENSG00000120458	MSANTD2	-0.0680416	4.1902	0.0564563
ENSG00000278962	RP11-399B17.1	-0.19431	1.37513	0.0573754
ENSG00000082438	COBLL1	-0.148367	4.60334	0.0580129
ENSG00000184220	CMSS1	-0.0910663	2.95023	0.0580129
ENSG00000197153	HIST1H3J	0.204824	2.0219	0.0580129
ENSG00000277149	TYW1B	-0.0947294	3.16442	0.0580129
ENSG00000067141	NEO1	-0.122915	3.16393	0.0583785
ENSG00000211873	TRAJ16	-0.137615	1.79068	0.0599215
ENSG00000233382	NKAPP1	-0.0981249	2.98984	0.0599215
ENSG00000112305	SMAP1	-0.0454009	5.30386	0.0625339
ENSG00000120800	UTP20	-0.0619176	5.41757	0.0667621
ENSG00000211878	TRAJ11	-0.123683	2.44611	0.067565
ENSG00000227550	TRBV7-5	0.301627	-1.58202	0.0698983
ENSG00000221866	PLXNA4	0.182293	2.91331	0.0705849
ENSG00000135363	LMO2	0.0673768	5.76597	0.0720394
ENSG00000109113	RAB34	0.113605	3.05941	0.0750821
ENSG00000144061	NPHP1	-0.243494	-0.343356	0.0754763
ENSG00000156239	N6AMT1	-0.0777503	4.16871	0.0759935
ENSG00000184357	HIST1H1B	0.175175	4.42246	0.0774241
ENSG00000211882	TRAJ7	-0.108444	2.5208	0.0782681
ENSG00000241294	IGKV2-24	0.323178	-0.311002	0.0783239
ENSG00000211888	TRAJ1	-0.14886	1.17873	0.0786796
ENSG00000262655	SPON1	-0.228619	1.04416	0.0805359
ENSG00000116285	ERRFI1	-0.19901	0.185833	0.0808064
ENSG00000112486	CCR6	-0.165555	1.48873	0.0809281
ENSG00000138738	PRDM5	-0.179093	3.82172	0.082065
ENSG00000131873	CHSY1	-0.0860833	6.59144	0.0825538
ENSG00000225527	RP11-383B4.4	-0.167966	0.514985	0.0825538
ENSG00000211861	TRAJ28	-0.114277	2.3536	0.0845807
ENSG00000154856	APCDD1	0.250686	-0.306119	0.0853447
ENSG00000198908	BHLHB9	-0.111498	1.65825	0.0853447
ENSG00000269001	ZNF818P	0.127088	2.77722	0.087703
ENSG00000186431	FCAR	-0.102819	5.06758	0.0886013
ENSG00000135519	KCNH3	0.159787	1.43936	0.089915
ENSG00000211862	TRAJ27	-0.112377	2.43802	0.0903965
ENSG00000114854	TNNC1	-0.275439	-1.47227	0.090899
ENSG00000211880	TRAJ9	-0.130995	1.90609	0.090899
ENSG00000270696	RP11-342K6.1	-0.11758	2.14651	0.090899
ENSG00000153363	LINC00467	0.111918	1.58561	0.0916088
ENSG00000235532	LINC00402	-0.148931	4.56206	0.0916088
ENSG00000255381	AP001258.5	-0.289009	-2.01177	0.0918055
ENSG00000174607	UGT8	-0.209169	1.57922	0.0953867
ENSG00000279320	RP11-329N15.3	-0.164087	2.68922	0.0968024
ENSG00000102897	LYRM1	0.0595729	4.30844	0.0989374
ENSG00000062524	LTK	-0.208684	1.47902	0.102707
ENSG00000211869	TRAJ20	-0.114061	2.24858	0.102707
ENSG00000204424	LY6G6F	0.277056	-0.299522	0.105709
ENSG00000169258	GPRIN1	0.261623	-1.13625	0.109282
ENSG00000211787	TRAV8-3	-0.111792	2.4974	0.109314
ENSG00000145375	SPATA5	-0.0523095	5.21959	0.110538
ENSG00000181751	C5orf30	0.0969599	2.90169	0.110538
ENSG00000183784	C9orf66	0.132172	1.57193	0.110538
ENSG00000240890	RP11-65E22.2	-0.203927	0.442986	0.110538
ENSG00000100644	HIF1A	-0.0647857	7.73844	0.110591
ENSG00000114316	USP4	0.0423761	7.6327	0.110591
ENSG00000188996	HUS1B	-0.193693	0.218904	0.111439
ENSG00000281106	LINC00282	-0.136241	5.20883	0.111439
ENSG00000235072	AC012074.2	-0.179594	0.267994	0.113301
ENSG00000276747	PADI6	0.325349	-2.20524	0.113385
ENSG00000173727	CMB9-22P13.1	0.156052	0.696674	0.113567
ENSG00000258352	RP11-23J18.1	-0.11003	1.66645	0.113567
ENSG00000154889	MPPE1	0.0611635	6.78121	0.11828
ENSG00000010818	HIVEP2	-0.0550398	7.44779	0.118517
ENSG00000171848	RRM2	0.183746	2.03969	0.119652
ENSG00000206344	HCG27	0.0759354	7.37638	0.1228
ENSG00000279199	RP11-749I16.3	0.189854	-0.190501	0.12338
ENSG00000112218	GPR63	-0.235428	0.23607	0.123953
ENSG00000116984	MTR	-0.0462708	6.85648	0.123953
ENSG00000132465	IGJ	0.275126	5.0365	0.123953
ENSG00000144741	SLC25A26	-0.0523297	4.20645	0.123953
ENSG00000156232	WHAMM	-0.06209	4.376	0.123953
ENSG00000165632	TAF3	-0.0551772	4.00744	0.123953
ENSG00000166197	NOLC1	-0.0529122	5.0029	0.123953
ENSG00000184588	PDE4B	-0.0563847	7.22682	0.123953
ENSG00000228782	CTD-2026D20.3	-0.10213	2.09543	0.123953
ENSG00000231365	RP11-418J17.1	-0.0846324	3.36911	0.123953
ENSG00000260936	FTO-IT1	-0.120216	2.25567	0.123953
ENSG00000272498	RP11-415F23.3	-0.126887	3.05125	0.123953
ENSG00000151746	BICD1	-0.083968	3.74192	0.129517
ENSG00000280149	RP4-751H13.5	-0.142141	0.683587	0.130412
ENSG00000110318	KIAA1377	-0.111457	2.4175	0.131327
ENSG00000165521	EML5	-0.0982791	3.55127	0.131327
ENSG00000197301	RP11-366L20.2	0.16962	0.369947	0.131327
ENSG00000211872	TRAJ17	-0.113692	2.10585	0.131327
ENSG00000108840	HDAC5	0.074815	5.46013	0.131465
ENSG00000235321	AC007556.3	0.253838	-0.846212	0.131465
ENSG00000166669	ATF7IP2	-0.0765088	4.90079	0.132001
ENSG00000225580	RP1-159M24.1	0.212652	-2.51412	0.132001
ENSG00000026025	VIM	0.0681106	10.1683	0.132848
ENSG00000198838	RYR3	0.292132	0.0148325	0.133634
ENSG00000198945	L3MBTL3	-0.0560667	5.31302	0.133634
ENSG00000204936	CD177	-0.46718	1.10656	0.133634
ENSG00000129473	BCL2L2	0.0659635	3.14774	0.1349
ENSG00000073737	DHRS9	0.140596	5.25726	0.136127
ENSG00000196110	ZNF699	0.0616017	4.36666	0.136975
ENSG00000231165	TRBV26OR9-2	0.284811	-2.33037	0.136975
ENSG00000085511	MAP3K4	-0.0465672	6.18566	0.137744
ENSG00000253636	RP11-531A24.5	-0.108168	1.91368	0.137744
ENSG00000124225	PMEPA1	-0.16289	1.62269	0.139083
ENSG00000184613	NELL2	-0.1221	6.36644	0.144191
ENSG00000106078	COBL	-0.278899	-2.28748	0.144604
ENSG00000005108	THSD7A	0.335038	0.0791047	0.145652
ENSG00000177606	JUN	0.106684	2.89393	0.146119
ENSG00000228106	RP11-452F19.3	-0.121843	1.46649	0.146119
ENSG00000211843	TRAJ46	-0.131382	1.34452	0.146321
ENSG00000253372	RP11-44N11.1	-0.141159	3.05629	0.146321
ENSG00000165061	ZMAT4	-0.356588	-1.14205	0.146345
ENSG00000169744	LDB2	-0.283332	-0.644459	0.1467
ENSG00000121039	RDH10	0.0876337	2.36847	0.150071
ENSG00000211847	TRAJ42	-0.113434	1.8365	0.150071
ENSG00000211859	TRAJ30	-0.111959	2.09315	0.150071
ENSG00000102445	KIAA0226L	-0.0968054	6.51706	0.150173
ENSG00000137831	UACA	0.139157	2.13778	0.150173
ENSG00000146021	KLHL3	-0.0982988	4.10318	0.150173
ENSG00000211640	IGLV6-57	0.288527	0.164232	0.150294
ENSG00000140284	SLC27A2	0.184079	0.431292	0.15122
ENSG00000157514	TSC22D3	0.0824736	8.36105	0.15122
ENSG00000102878	HSF4	0.200968	-0.531252	0.152487
ENSG00000122707	RECK	-0.0584798	3.72061	0.152487
ENSG00000124243	BCAS4	-0.0867507	3.74928	0.152487
ENSG00000168795	ZBTB5	-0.045372	4.22837	0.152487
ENSG00000183662	FAM19A1	-0.178536	1.35648	0.152487
ENSG00000196584	XRCC2	0.178998	0.801149	0.152487
ENSG00000204344	STK19	0.0578936	3.36626	0.152487
ENSG00000204455	TRIM51BP	0.334555	-1.51531	0.152487
ENSG00000233968	RP11-354E11.2	0.287432	-1.19771	0.152487
ENSG00000263916	RP11-110H1.4	-0.178039	-0.208024	0.152487
ENSG00000063601	MTMR1	-0.0423798	6.18938	0.154428
ENSG00000117000	RLF	0.0622131	6.73095	0.154428
ENSG00000128294	TPST2	0.0646901	6.34276	0.154428
ENSG00000129167	TPH1	-0.156167	0.875999	0.154428
ENSG00000129682	FGF13	-0.347989	-0.280177	0.154428
ENSG00000138134	STAMBPL1	-0.0640486	5.26398	0.154428
ENSG00000151694	ADAM17	0.0457312	6.36129	0.154428
ENSG00000187098	MITF	0.105477	2.31255	0.154428
ENSG00000224331	AC019181.3	-0.262415	-1.12307	0.154428
ENSG00000240893	RP11-572C15.5	0.281736	-2.28983	0.154428
ENSG00000243466	IGKV1-5	0.245782	2.98334	0.154428
ENSG00000255142	AP006621.6	0.122112	0.755473	0.154428
ENSG00000211863	TRAJ26	-0.107731	2.38617	0.15478
ENSG00000269404	SPIB	-0.144909	3.16235	0.15478
ENSG00000277443	MARCKS	-0.101241	5.9565	0.15478
ENSG00000108924	HLF	-0.190198	0.359147	0.155107
ENSG00000134489	HRH4	0.140582	3.38662	0.157439
ENSG00000145451	GLRA3	-0.301277	-2.46303	0.157585
ENSG00000267275	CTD-2562J15.6	0.191483	-0.267715	0.158465
ENSG00000100024	UPB1	0.142405	1.41993	0.159478
ENSG00000198932	GPRASP1	-0.0851833	5.35251	0.159478
ENSG00000240403	KIR3DL2	0.281056	-0.578469	0.159478
ENSG00000187510	PLEKHG7	-0.274432	-0.407947	0.160995
ENSG00000272505	RP11-981G7.6	-0.13433	2.34268	0.160995
ENSG00000147180	ZNF711	-0.170565	1.33966	0.161122
ENSG00000196747	HIST1H2AI	0.127848	3.1388	0.161122
ENSG00000196866	HIST1H2AD	0.105866	4.39762	0.161122
ENSG00000211871	TRAJ18	-0.101528	2.35821	0.161122
ENSG00000226784	PGAM4	0.189368	-2.68766	0.161122
ENSG00000226240	LINC00381	-0.259783	-1.18345	0.162012
ENSG00000101412	E2F1	0.157667	1.31671	0.162731
ENSG00000153107	ANAPC1	-0.046354	5.6225	0.163009
ENSG00000057252	SOAT1	-0.0431786	6.66619	0.163472
ENSG00000211868	TRAJ21	-0.119747	2.29474	0.163472
ENSG00000226498	RP11-182B22.2	-0.162176	0.66928	0.163472
ENSG00000110723	EXPH5	-0.126187	2.3866	0.164111
ENSG00000163492	CCDC141	-0.121327	4.93616	0.164111
ENSG00000197403	OR6N1	0.278425	-2.28542	0.164111
ENSG00000198105	ZNF248	-0.0595444	4.44963	0.164111
ENSG00000267040	RP11-35G9.3	-0.0777435	3.10512	0.164111
ENSG00000250329	KDELC1P1	-0.166276	0.116938	0.164607
ENSG00000261072	RP11-5N19.3	-0.124455	2.04196	0.164607
ENSG00000235304	LINC01281	-0.269291	-1.1492	0.164876
ENSG00000244041	LINC01011	0.0777633	2.53754	0.164876
ENSG00000181754	AMIGO1	-0.0918628	3.61689	0.165965
ENSG00000251432	RP11-420A23.1	-0.118883	1.71433	0.167098
ENSG00000152409	JMY	-0.0582867	5.07151	0.167731
ENSG00000112941	PAPD7	-0.0667963	4.06767	0.169114
ENSG00000151320	AKAP6	-0.17695	2.76302	0.169114
ENSG00000169252	ADRB2	0.0923294	5.80649	0.169114
ENSG00000189253	TRIM64B	0.323145	-2.33366	0.169114
ENSG00000271918	CTD-2287O16.5	-0.117313	1.19816	0.169314
ENSG00000171984	C20orf196	-0.0861944	2.99972	0.170143
ENSG00000233247	GS1-257G1.1	0.183382	-2.67126	0.171025
ENSG00000147124	ZNF41	-0.0454501	4.72401	0.171278
ENSG00000138336	TET1	-0.0777831	2.87889	0.171666
ENSG00000158711	ELK4	-0.0411125	7.45064	0.171666
ENSG00000075618	FSCN1	0.171883	-0.163089	0.17435
ENSG00000184867	ARMCX2	-0.117205	1.75873	0.17435
ENSG00000254286	RP11-89K10.1	-0.126679	1.54365	0.17435
ENSG00000140993	TIGD7	0.100934	4.08822	0.175493
ENSG00000248124	RRN3P1	-0.0773303	4.2038	0.177605
ENSG00000261451	RP11-981G7.1	-0.163691	2.37215	0.177605
ENSG00000225092	RP11-405O10.2	-0.120692	1.85756	0.177838
ENSG00000256981	TAS2R18	-0.106385	3.0665	0.177838
ENSG00000271856	LINC01215	-0.0826428	4.24527	0.177838
ENSG00000273129	PACERR	0.194111	-0.334096	0.177838
ENSG00000168389	MFSD2A	-0.10872	1.84116	0.178879
ENSG00000247708	STX18-AS1	-0.0870653	2.75015	0.178879
ENSG00000161905	ALOX15	-0.225037	2.58022	0.179484
ENSG00000280135	RP1-47M23.3	-0.0796204	3.3807	0.180334
ENSG00000115919	KYNU	-0.0812503	5.63862	0.180666
ENSG00000102710	SUPT20H	-0.047409	6.82372	0.18122
ENSG00000155158	TTC39B	-0.0639591	5.99502	0.18122
ENSG00000046647	GEMIN8	-0.0626638	3.14552	0.182132
ENSG00000211786	TRAV8-2	-0.124122	1.47038	0.182132
ENSG00000274267	HIST1H3B	0.165144	3.32229	0.182132
ENSG00000206448	PPIAP30	-0.235859	-0.822806	0.182673
ENSG00000171444	MCC	-0.168124	1.70999	0.183154
ENSG00000144306	SCRN3	0.0602688	3.83564	0.184142
ENSG00000005189	AC004381.6	0.13208	0.900343	0.184505
ENSG00000125246	CLYBL	-0.0753605	3.0024	0.184505
ENSG00000156650	KAT6B	-0.0447111	5.9303	0.184505
ENSG00000182885	GPR97	-0.114447	6.12073	0.184505
ENSG00000162630	B3GALT2	-0.221699	1.65804	0.184744
ENSG00000181619	GPR135	-0.125495	1.87095	0.185506
ENSG00000138074	SLC5A6	-0.0654613	3.25151	0.187168
ENSG00000235621	LINC00494	-0.205071	1.36185	0.187168
ENSG00000229668	RP11-317F20.2	-0.194626	-0.114461	0.188938
ENSG00000145041	VPRBP	-0.0428383	5.6387	0.189924
ENSG00000110934	BIN2	0.0323234	8.54616	0.191367
ENSG00000124203	ZNF831	-0.0585069	5.99995	0.191367
ENSG00000211879	TRAJ10	-0.106069	2.39392	0.191367
ENSG00000001460	STPG1	-0.0949055	1.65432	0.192634
ENSG00000269918	AF131215.9	-0.0898454	2.74354	0.192634
ENSG00000124429	POF1B	-0.244687	-0.285531	0.194259
ENSG00000133101	CCNA1	0.297295	-1.64792	0.194601
ENSG00000144749	LRIG1	-0.0627366	5.35182	0.194601
ENSG00000151445	VIPAS39	0.0322015	5.20086	0.194601
ENSG00000160602	NEK8	-0.104026	1.51135	0.194601
ENSG00000164330	EBF1	-0.1756	2.57269	0.194601
ENSG00000182670	TTC3	-0.0537278	7.68531	0.194601
ENSG00000197798	FAM118B	0.0542306	4.17	0.194601
ENSG00000211677	IGLC2	0.230256	3.38956	0.194601
ENSG00000228150	RP11-84A14.4	0.230877	-1.61457	0.194601
ENSG00000228863	RP11-404F10.2	-0.143009	1.53193	0.194601
ENSG00000232354	VIPR1-AS1	-0.183262	0.0974488	0.194601
ENSG00000244198	RP4-545C24.1	-0.207029	0.577617	0.194601
ENSG00000269051	CTD-2245F17.3	0.082816	2.98991	0.194601
ENSG00000277782	RP11-775C24.5	0.17021	0.160199	0.194601
ENSG00000279192	PWAR5	-0.0850204	4.30167	0.194601
ENSG00000181555	SETD2	-0.0413861	7.60695	0.195068
ENSG00000221957	KIR2DS4	0.334116	-0.0723746	0.196698
ENSG00000237989	AP001046.5	-0.244104	-1.38624	0.196997
ENSG00000188958	UTS2B	-0.285913	-1.97191	0.197011
ENSG00000268529	CYP2T3P	0.281874	-2.40611	0.198564
ENSG00000226124	FTCDNL1	-0.114555	1.2364	0.198593
ENSG00000261546	CTD-2555A7.3	0.169034	-0.153221	0.198593
ENSG00000213999	MEF2B	0.224829	-2.2995	0.200376
ENSG00000277496	RP11-93B14.9	0.0794275	3.44364	0.201001
ENSG00000102796	DHRS12	-0.0964963	5.0094	0.201489
ENSG00000151612	ZNF827	-0.101265	3.13912	0.201489
ENSG00000175414	ARL10	-0.0896307	3.82023	0.201489
ENSG00000185163	DDX51	-0.0690048	2.92854	0.201489
ENSG00000225434	LINC01504	0.0866884	2.67915	0.201489
ENSG00000251149	MTND5P5	-0.225917	0.884483	0.201489
ENSG00000036530	CYP46A1	-0.24358	-1.38933	0.20261
ENSG00000079215	SLC1A3	0.181456	0.363758	0.20261
ENSG00000235381	RP11-477D19.2	-0.0867988	2.72087	0.20261
ENSG00000271888	RP11-560J1.2	0.221592	-1.23166	0.202676
ENSG00000033170	FUT8	-0.0585496	5.17762	0.202695
ENSG00000173482	PTPRM	-0.172666	3.83673	0.202695
ENSG00000213694	S1PR3	0.0967346	3.8967	0.202695
ENSG00000231842	RP11-527F13.1	-0.21864	-0.972094	0.202695
ENSG00000237248	LINC00987	-0.185492	2.63547	0.202695
ENSG00000272529	RP11-415F23.4	-0.115831	2.50056	0.203291
ENSG00000144036	EXOC6B	-0.0554058	4.74174	0.203478
ENSG00000142207	URB1	-0.0599019	4.97257	0.204508
ENSG00000145911	N4BP3	-0.143741	1.41056	0.205991
ENSG00000106799	TGFBR1	0.0486801	7.553	0.206687
ENSG00000257735	RP11-370I10.6	0.236845	-2.10308	0.211969
ENSG00000271911	RP11-532F6.5	-0.246405	-1.72318	0.211969
ENSG00000146909	NOM1	-0.0402708	4.81441	0.21271
ENSG00000233844	KCNQ5-IT1	-0.180815	0.90323	0.21271
ENSG00000135124	P2RX4	0.0480585	4.65879	0.214683
ENSG00000223546	LINC00630	-0.0737795	2.39762	0.214683
ENSG00000274641	HIST1H2BO	0.133516	2.60337	0.214683
ENSG00000276410	HIST1H2BB	0.155424	1.86449	0.214683
ENSG00000278991	RP11-797A18.5	-0.164812	1.03544	0.214683
ENSG00000073282	TP63	0.234579	-1.27583	0.215027
ENSG00000211867	TRAJ22	-0.0980842	2.56913	0.215027
ENSG00000214595	EML6	-0.153796	2.21824	0.215027
ENSG00000234426	RP11-459O1.2	0.630782	0.256263	0.215027
ENSG00000254635	WAC-AS1	0.063352	4.50499	0.215027
ENSG00000281189	GHET1	0.245865	-2.02629	0.215027
ENSG00000107643	MAPK8	-0.0451777	5.5886	0.215615
ENSG00000152056	AP1S3	-0.128101	1.15391	0.215615
ENSG00000185304	RGPD2	0.28662	1.04256	0.215615
ENSG00000211806	TRAV25	-0.163755	0.955097	0.215615
ENSG00000238713	Y_RNA	-0.20114	-0.650839	0.215615
ENSG00000261553	RP11-29G8.3	-0.126374	1.04834	0.215615
ENSG00000270048	RP11-214K3.22	-0.128848	0.939578	0.215615
ENSG00000211884	TRAJ5	-0.0954565	2.31766	0.218546
ENSG00000150991	UBC	0.0578327	9.62382	0.218807
ENSG00000064490	RFXANK	0.0694309	4.41357	0.220414
ENSG00000143554	SLC27A3	0.0714276	4.49581	0.222045
ENSG00000177706	FAM20C	0.131782	1.31291	0.222957
ENSG00000206989	SNORD63	-0.23182	-1.85455	0.222957
ENSG00000233387	RP11-342D11.3	-0.135959	1.95404	0.222957
ENSG00000132704	FCRL2	-0.177501	4.40475	0.223379
ENSG00000224650	IGHV3-74	0.235886	0.12409	0.223379
ENSG00000240441	RP11-864J10.2	-0.236606	-2.03197	0.223379
ENSG00000118402	ELOVL4	-0.198032	0.552272	0.224746
ENSG00000110944	IL23A	-0.129432	1.8254	0.224898
ENSG00000151490	PTPRO	0.08509	4.26055	0.227562
ENSG00000235141	COX6CP17	-0.233469	-0.999854	0.227816
ENSG00000157077	ZFYVE9	-0.0932276	3.31108	0.228166
ENSG00000099204	ABLIM1	-0.0664334	7.49496	0.230785
ENSG00000125384	PTGER2	0.0595477	5.50542	0.231734
ENSG00000183230	CTNNA3	0.245469	-2.3558	0.231734
ENSG00000002587	HS3ST1	-0.208804	0.677548	0.23463
ENSG00000113749	HRH2	-0.0930331	6.10945	0.234943
ENSG00000168675	LDLRAD4	-0.0581636	5.73768	0.235423
ENSG00000115652	UXS1	-0.0473283	5.59715	0.237011
ENSG00000168887	C2orf68	0.0351651	6.06116	0.237011
ENSG00000111231	GPN3	0.0869067	2.99989	0.237107
ENSG00000207352	RNU6-540P	-0.218768	-1.66432	0.237107
ENSG00000164953	TMEM67	-0.0878676	2.07548	0.237702
ENSG00000210151	MT-TS1	0.237383	-1.4392	0.23782
ENSG00000181819	KCTD9P2	0.173796	-2.50664	0.23794
ENSG00000272986	RP11-46J23.1	0.234471	-2.02917	0.23794
ENSG00000211895	IGHA1	0.272037	4.05353	0.241171
ENSG00000253755	IGHGP	0.266414	-2.55295	0.241171
ENSG00000273173	SNURF	-0.163112	0.152356	0.241171
ENSG00000276903	HIST1H2AL	0.133147	2.20943	0.241171
ENSG00000261098	RP11-819C21.1	-0.108829	3.07194	0.242492
ENSG00000254006	RP11-1D12.2	0.278525	-2.1631	0.242644
ENSG00000256060	TRAPPC2B	0.12294	1.189	0.24277
ENSG00000136014	USP44	-0.153166	2.0148	0.244058
ENSG00000256712	RP11-785H5.2	-0.0985348	2.39789	0.244058
ENSG00000273802	HIST1H2BG	0.0849748	4.45566	0.244058
ENSG00000183579	ZNRF3	-0.154233	-0.164322	0.244296
ENSG00000214140	PRCD	-0.225718	-0.439861	0.244296
ENSG00000232748	RP11-196G11.6	0.221867	-2.1885	0.246281
ENSG00000145022	TCTA	0.0440416	4.45868	0.25236
ENSG00000007392	LUC7L	-0.0501095	5.36158	0.252391
ENSG00000016864	GLT8D1	0.0391922	4.92789	0.252391
ENSG00000112425	EPM2A	-0.0718157	2.97461	0.252391
ENSG00000121807	CCR2	0.0725954	7.37717	0.252391
ENSG00000171044	XKR6	-0.103189	2.62025	0.252391
ENSG00000244701	RP5-894A10.2	-0.0831616	2.36173	0.252391
ENSG00000249307	LINC01088	-0.2359	-1.51576	0.252391
ENSG00000273249	LL09NC01-251B2.3	0.211459	-1.99524	0.252391
ENSG00000046604	DSG2	0.241067	-1.73988	0.253094
ENSG00000077264	PAK3	-0.204949	-0.45012	0.253094
ENSG00000111728	ST8SIA1	-0.117425	3.95616	0.253094
ENSG00000113812	ACTR8	-0.0339522	5.38147	0.253094
ENSG00000174842	GLMN	-0.0757413	3.29444	0.253094
ENSG00000214900	LINC01588	-0.0867322	3.30489	0.253094
ENSG00000225541	AC002480.5	-0.240519	0.435184	0.253094
ENSG00000226839	MTND6P11	-0.22958	-0.323933	0.253094
ENSG00000211883	TRAJ6	-0.0921713	2.34477	0.253531
ENSG00000255726	XXbac-BPG299F13.15	0.216073	-2.32745	0.253531
ENSG00000255776	RP11-436I9.3	-0.154675	2.45601	0.253531
ENSG00000277775	HIST1H3F	0.133918	2.90875	0.253531
ENSG00000100802	C14orf93	0.0475206	3.4956	0.256259
ENSG00000175746	C15orf54	-0.215309	1.76645	0.258473
ENSG00000236946	HNRNPA1P70	-0.188507	1.68815	0.259475
ENSG00000019485	PRDM11	-0.0794316	2.90502	0.259995
ENSG00000123689	G0S2	-0.215404	0.138356	0.259995
ENSG00000170265	ZNF282	0.0563634	3.79202	0.259995
ENSG00000187753	C9orf153	-0.206891	-0.755444	0.259995
ENSG00000197275	RAD54B	-0.14831	0.691167	0.259995
ENSG00000211881	TRAJ8	-0.101523	1.91812	0.259995
ENSG00000258526	RP11-111A21.1	-0.181492	-0.0783307	0.259995
ENSG00000278463	HIST1H2AB	0.165611	1.36907	0.259995
ENSG00000158292	GPR153	0.171855	0.1275	0.260084
ENSG00000109684	CLNK	-0.188483	0.33953	0.263247
ENSG00000111206	FOXM1	0.211999	-0.67173	0.263247
ENSG00000276317	RP11-93B14.10	0.0957388	1.74436	0.263247
ENSG00000272669	RP3-508I15.21	-0.119889	1.11609	0.263728
ENSG00000108395	TRIM37	-0.0454134	5.06339	0.264105
ENSG00000215375	MYL5	0.0938259	1.89194	0.264105
ENSG00000258458	CTD-2555K7.2	0.213695	-1.29517	0.264105
ENSG00000263482	ANTXRLP1	-0.0999487	3.18328	0.264105
ENSG00000164125	FAM198B	0.0765532	5.95186	0.264365
ENSG00000030110	BAK1	0.0736221	4.55413	0.264958
ENSG00000089012	SIRPG	-0.0887048	3.18245	0.264958
ENSG00000101384	JAG1	-0.0756474	2.94373	0.265652
ENSG00000123353	ORMDL2	0.037298	4.76237	0.265652
ENSG00000166167	BTRC	-0.0668365	4.08332	0.265652
ENSG00000211805	TRAV24	-0.184713	0.403153	0.265652
ENSG00000276916	RP11-230F18.6	0.139744	0.349652	0.265652
ENSG00000227039	ITGB2-AS1	0.072785	5.37674	0.267198
ENSG00000107104	KANK1	0.138926	3.58736	0.267455
ENSG00000118420	UBE3D	-0.0636503	3.36737	0.267455
ENSG00000147231	CXorf57	-0.0798769	2.99826	0.267455
ENSG00000157303	SUSD3	-0.0695141	3.94538	0.267455
ENSG00000162415	ZSWIM5	-0.104358	2.25198	0.267455
ENSG00000169241	SLC50A1	0.0560027	4.02084	0.267455
ENSG00000169507	SLC38A11	-0.256703	1.55752	0.267455
ENSG00000171522	PTGER4	0.0481104	6.34859	0.267455
ENSG00000207306	RNU6-1152P	-0.251282	-1.39078	0.267455
ENSG00000228242	AC093495.4	0.077146	4.84633	0.267455
ENSG00000241990	PRR34-AS1	0.0544771	3.44627	0.267455
ENSG00000271582	RP11-511P7.4	-0.237489	-0.812466	0.267455
ENSG00000274997	HIST1H2AH	0.146979	2.09794	0.267455
ENSG00000089123	TASP1	-0.0454206	3.88292	0.269152
ENSG00000131844	MCCC2	-0.0438681	4.53565	0.269469
ENSG00000200834	Y_RNA	-0.200427	-1.13789	0.269535
ENSG00000151413	NUBPL	-0.0598876	3.03657	0.269605
ENSG00000058056	USP13	-0.0643318	3.56863	0.27035
ENSG00000161249	DMKN	-0.229555	-1.06579	0.27035
ENSG00000172817	CYP7B1	0.19801	-0.769542	0.27035
ENSG00000214552	COPS8P2	-0.144364	1.44409	0.27035
ENSG00000128438	TBC1D27	-0.226001	0.191793	0.270688
ENSG00000144524	COPS7B	-0.063653	3.98586	0.270688
ENSG00000145982	FARS2	-0.0494762	4.24992	0.270688
ENSG00000147883	CDKN2B	0.106583	2.00762	0.270688
ENSG00000169231	THBS3	0.0625446	4.05908	0.270688
ENSG00000182197	EXT1	-0.0601092	4.84336	0.270688
ENSG00000242258	LINC00996	-0.155509	0.409424	0.270688
ENSG00000255507	RP11-535A19.2	0.218733	-1.79408	0.270688
ENSG00000259088	CTD-2017C7.2	-0.219212	-1.58681	0.270688
ENSG00000229728	RP11-314N13.3	-0.159688	0.248329	0.271505
ENSG00000140365	COMMD4	0.0661157	3.27047	0.27231
ENSG00000200075	SNORA25	-0.14347	0.297783	0.273423
ENSG00000179988	PSTK	-0.0800534	2.00323	0.273482
ENSG00000211855	TRAJ34	-0.104571	1.58908	0.273732
ENSG00000081052	COL4A4	-0.184097	1.67602	0.274635
ENSG00000235665	LINC00298	0.16735	0.628335	0.274635
ENSG00000157168	NRG1	0.197094	3.26983	0.276898
ENSG00000159352	PSMD4	0.0518103	6.47695	0.276898
ENSG00000108788	MLX	0.0349747	5.90876	0.276952
ENSG00000261544	RP11-16E23.3	-0.142145	1.14072	0.277609
ENSG00000229127	AC007038.7	-0.0744659	3.68216	0.278921
ENSG00000175352	NRIP3	0.165483	0.589064	0.27903
ENSG00000002745	WNT16	-0.271862	0.0130259	0.279499
ENSG00000029639	TFB1M	-0.0483598	4.15685	0.279499
ENSG00000186260	MKL2	-0.0622882	4.48289	0.280377
ENSG00000269743	SLC25A53	-0.0539586	3.99711	0.281368
ENSG00000005471	ABCB4	-0.163119	2.80413	0.283442
ENSG00000101557	USP14	-0.0570312	4.61494	0.283442
ENSG00000136709	WDR33	-0.0361973	7.07737	0.283442
ENSG00000137288	UQCC2	-0.0563086	3.71759	0.283442
ENSG00000175048	ZDHHC14	-0.091627	2.25183	0.283442
ENSG00000175322	ZNF519	-0.0689379	3.60057	0.283442
ENSG00000211826	TRDJ4	0.183828	0.0140389	0.283442
ENSG00000233730	RP4-666F24.3	0.156512	1.15387	0.283442
ENSG00000242285	RPL6P8	0.224405	-1.70249	0.283442
ENSG00000078070	MCCC1	-0.0377172	4.64464	0.283606
ENSG00000108021	FAM208B	-0.0346103	7.31214	0.283606
ENSG00000145685	LHFPL2	0.0886435	4.62975	0.283606
ENSG00000173258	ZNF483	-0.0771599	3.49746	0.283606
ENSG00000211866	TRAJ23	-0.0909174	2.56518	0.283606
ENSG00000226950	DANCR	-0.0606152	3.82142	0.283606
ENSG00000227398	KIF9-AS1	-0.104458	0.834653	0.283606
ENSG00000231752	EMBP1	-0.0968207	3.1693	0.283606
ENSG00000162836	ACP6	-0.0704769	4.19921	0.284225
ENSG00000105865	DUS4L	-0.0678026	2.64411	0.286324
ENSG00000076356	PLXNA2	-0.100064	3.50672	0.287333
ENSG00000160447	PKN3	0.193842	-1.02183	0.287333
ENSG00000267265	CTC-550B14.7	0.144268	1.57864	0.287333
ENSG00000229054	AC074338.4	0.125917	0.723277	0.287906
ENSG00000174469	CNTNAP2	-0.32961	0.578153	0.288292
ENSG00000261219	RP11-344A16.2	-0.216831	-1.42938	0.288503
ENSG00000166326	TRIM44	-0.0346009	6.83049	0.292167
ENSG00000175591	P2RY2	-0.099006	2.72412	0.292167
ENSG00000176225	RTTN	-0.0421474	5.70761	0.292167
ENSG00000082512	TRAF5	-0.0510639	6.43529	0.293621
ENSG00000139832	RAB20	-0.112337	3.05901	0.293621
ENSG00000147642	SYBU	-0.237962	-1.08245	0.293621
ENSG00000177096	FAM109B	0.0881432	1.80204	0.293621
ENSG00000177614	PGBD5	-0.242049	-2.3881	0.293621
ENSG00000196465	MYL6B	0.143712	0.201926	0.293621
ENSG00000211649	IGLV7-46	0.269814	-0.322418	0.293621
ENSG00000213801	ZNF816-ZNF321P	0.082678	1.73711	0.293621
ENSG00000226410	AC104058.1	-0.218584	-1.03589	0.293621
ENSG00000254363	CTB-131B5.5	-0.14908	1.11264	0.293621
ENSG00000275004	ZNF280B	-0.0961958	1.3956	0.293621
ENSG00000281653	AC109465.1	-0.208328	-1.52155	0.293621
ENSG00000067048	DDX3Y	-0.0612845	2.034	0.293661
ENSG00000072954	TMEM38A	0.0966255	1.74526	0.293661
ENSG00000075426	FOSL2	-0.0754111	7.01844	0.293661
ENSG00000105205	CLC	0.126468	5.4325	0.293661
ENSG00000107249	GLIS3	-0.194066	0.737909	0.293661
ENSG00000107679	PLEKHA1	-0.0514719	6.38269	0.293661
ENSG00000143869	GDF7	-0.238171	1.57991	0.293661
ENSG00000145390	USP53	-0.09736	5.45814	0.293661
ENSG00000155265	GOLGA7B	-0.0852199	3.31246	0.293661
ENSG00000164241	C5orf63	-0.0704071	3.8167	0.293661
ENSG00000180573	HIST1H2AC	0.0563301	7.94612	0.293661
ENSG00000186231	KLHL32	-0.109463	1.26148	0.293661
ENSG00000225213	RP11-197M22.2	-0.140518	0.853847	0.293661
ENSG00000265992	ESRG	0.286396	-2.26329	0.293661
ENSG00000266017	MIR4477B	0.151585	0.983781	0.293661
ENSG00000279198	CTD-2231E14.2	0.19686	-1.4725	0.293661
ENSG00000170296	GABARAP	0.0602284	4.17661	0.294559
ENSG00000226688	ENTPD1-AS1	-0.0562031	3.26669	0.294559
ENSG00000268895	A1BG-AS1	0.0876407	2.05719	0.294559
ENSG00000233822	HIST1H2BN	0.0785425	3.70176	0.296368
ENSG00000255310	AF131215.2	-0.0748786	3.3255	0.296368
ENSG00000255112	CHMP1B	0.0454478	7.06272	0.297083
ENSG00000124610	HIST1H1A	0.213959	-2.28549	0.298465
ENSG00000120278	PLEKHG1	-0.122788	3.87559	0.300308
ENSG00000154764	WNT7A	-0.129096	1.73762	0.300308
ENSG00000144642	RBMS3	-0.19762	-0.460373	0.300534
ENSG00000134759	ELP2	-0.040361	6.41075	0.301593
ENSG00000142408	CACNG8	0.159476	0.446419	0.301593
ENSG00000111785	RIC8B	-0.0437503	4.81978	0.301975
ENSG00000184731	FAM110C	-0.186637	0.410962	0.301975
ENSG00000273210	AP001437.1	0.170432	-0.703832	0.301975
ENSG00000204261	PSMB8-AS1	0.0431003	6.58297	0.30321
ENSG00000279348	RP11-566E18.1	-0.0549906	4.02507	0.30321
ENSG00000211598	IGKV4-1	0.195951	3.28998	0.303656
ENSG00000267533	RP11-815J4.7	0.142399	-2.94068	0.304604
ENSG00000159445	THEM4	-0.0748627	4.33579	0.306243
ENSG00000029153	ARNTL2	0.13335	0.964464	0.306732
ENSG00000177406	RP11-218M22.1	0.0650991	4.57199	0.308877
ENSG00000184675	AMER1	-0.0532246	3.5755	0.308877
ENSG00000184678	HIST2H2BE	0.0622351	6.45368	0.308877
ENSG00000197165	SULT1A2	0.210912	-0.140998	0.308877
ENSG00000154920	EME1	0.175345	-0.508467	0.309661
ENSG00000171606	ZNF274	0.0397729	6.0133	0.309661
ENSG00000259652	RP11-797A18.3	0.190524	0.648874	0.309661
ENSG00000115414	FN1	0.274418	-2.18571	0.31035
ENSG00000138363	ATIC	-0.0606466	3.67308	0.31035
ENSG00000163171	CDC42EP3	0.0528802	7.55903	0.31035
ENSG00000186416	NKRF	-0.0456483	3.90146	0.31035
ENSG00000261040	WFDC21P	-0.245541	-1.80399	0.31035
ENSG00000012817	KDM5D	-0.0483574	2.09379	0.312969
ENSG00000108474	PIGL	-0.053599	4.1948	0.312969
ENSG00000124508	BTN2A2	0.0579537	4.43057	0.312969
ENSG00000132563	REEP2	0.201091	-2.06982	0.312969
ENSG00000151623	NR3C2	-0.0654623	5.41564	0.312969
ENSG00000163644	PPM1K	-0.0506466	6.59873	0.312969
ENSG00000165209	STRBP	-0.0812962	5.31443	0.312969
ENSG00000165879	FRAT1	0.0600523	6.32708	0.312969
ENSG00000172594	SMPDL3A	0.0898385	2.96563	0.312969
ENSG00000178562	CD28	-0.0760032	6.68534	0.312969
ENSG00000213172	RP1-228H13.2	0.195016	-0.547734	0.312969
ENSG00000218730	RP3-453I5.2	-0.173693	0.935895	0.312969
ENSG00000230735	RP11-413E1.4	-0.110228	1.9888	0.312969
ENSG00000235954	TTC28-AS1	-0.0506298	3.62103	0.312969
ENSG00000241490	RP11-553L6.2	-0.0862636	2.68403	0.312969
ENSG00000249673	NOP14-AS1	0.0508378	4.2417	0.312969
ENSG00000253075	RN7SKP92	-0.207723	-1.27654	0.312969
ENSG00000261269	RP11-389C8.2	-0.132419	0.575286	0.312969
ENSG00000279481	RP11-181K12.1	-0.164092	-0.0128981	0.312969
ENSG00000280997	CCAT2	-0.168089	-0.235071	0.312969
ENSG00000104177	MYEF2	-0.0971205	3.61186	0.313491
ENSG00000167107	ACSF2	0.0566991	3.38397	0.313491
ENSG00000211668	IGLV2-11	0.195664	1.21073	0.313491
ENSG00000222588	SNORA19	-0.198189	-1.40552	0.313491
ENSG00000224972	RP11-403H13.1	-0.139702	1.11312	0.313491
ENSG00000243927	MRPS6	-0.0595485	3.79593	0.313491
ENSG00000262877	RP11-1055B8.4	0.115704	0.47605	0.313535
ENSG00000114374	USP9Y	-0.0531137	1.92077	0.314276
ENSG00000131747	TOP2A	0.122592	2.62193	0.314665
ENSG00000140876	NUDT7	0.102931	1.54611	0.314665
ENSG00000164265	SCGB3A2	0.249707	-2.0945	0.315249
ENSG00000268439	RP3-461F17.3	-0.145228	-0.0703981	0.315249
ENSG00000187862	TTC24	-0.152698	0.742919	0.317808
ENSG00000163155	LYSMD1	0.126631	0.487366	0.317859
ENSG00000197903	HIST1H2BK	0.0727231	5.85358	0.317859
ENSG00000145386	CCNA2	0.122161	1.39495	0.318182
ENSG00000187391	MAGI2	-0.212142	-1.61397	0.318463
ENSG00000067082	KLF6	0.0334459	8.66617	0.318796
ENSG00000133997	MED6	-0.0413221	4.76873	0.318796
ENSG00000251194	RP1-68D18.2	-0.0780861	3.04064	0.318796
ENSG00000088930	XRN2	-0.0331022	7.5554	0.322036
ENSG00000126970	ZC4H2	-0.0765021	2.3062	0.322036
ENSG00000158406	HIST1H4H	0.0764483	5.20329	0.322036
ENSG00000240853	RN7SL328P	-0.137416	1.06996	0.322036
ENSG00000112983	BRD8	-0.0411061	5.1803	0.322069
ENSG00000154473	BUB3	-0.0349976	6.6291	0.32241
ENSG00000161405	IKZF3	-0.0539258	7.7394	0.32241
ENSG00000166261	ZNF202	-0.0377835	4.36294	0.32241
ENSG00000177710	SLC35G5	-0.171494	-0.826319	0.32241
ENSG00000189127	ANKRD34B	0.222845	0.742319	0.32241
ENSG00000251934	RNU6-1143P	-0.201558	-1.67291	0.32241
ENSG00000040487	PQLC2	0.0696703	2.30405	0.322817
ENSG00000111537	IFNG	0.212655	0.105228	0.322817
ENSG00000112685	EXOC2	-0.03413	6.45813	0.322817
ENSG00000136153	LMO7	-0.0717538	3.76606	0.322817
ENSG00000147408	CSGALNACT1	-0.0820652	5.63702	0.322817
ENSG00000154736	ADAMTS5	-0.139256	1.65281	0.322817
ENSG00000162490	DRAXIN	0.137695	2.10403	0.322817
ENSG00000163328	GPR155	-0.0532905	6.66417	0.322817
ENSG00000185130	HIST1H2BL	0.124551	1.85109	0.322817
ENSG00000188848	BEND4	-0.139828	2.21155	0.322817
ENSG00000237702	TRBV3-1	-0.134843	1.53907	0.322817
ENSG00000258116	RP11-493L12.6	-0.279761	-1.58484	0.322929
ENSG00000265008	RP11-53I6.3	0.197796	-2.3059	0.323456
ENSG00000211652	IGLV7-43	0.255191	-0.511329	0.323784
ENSG00000102921	N4BP1	-0.0401116	7.03218	0.324314
ENSG00000107651	SEC23IP	-0.0373541	5.33181	0.324314
ENSG00000127957	PMS2P3	-0.0513847	3.17792	0.324314
ENSG00000172575	RASGRP1	-0.0453297	7.03038	0.324314
ENSG00000197381	ADARB1	-0.0718406	4.92905	0.324314
ENSG00000239839	DEFA3	0.365358	3.55158	0.324314
ENSG00000253736	RP11-779O18.3	0.205716	-1.85018	0.324314
ENSG00000023330	ALAS1	0.0466118	4.81126	0.324595
ENSG00000164045	CDC25A	0.202578	-0.739117	0.324595
ENSG00000249309	RP11-153M7.5	0.135322	1.71592	0.324595
ENSG00000138674	SEC31A	-0.0362909	6.43091	0.324694
ENSG00000211777	TRAV3	-0.124221	1.4502	0.324694
ENSG00000243896	OR2A7	-0.232313	-2.13481	0.324694
ENSG00000103356	EARS2	-0.0413613	4.04536	0.324995
ENSG00000101019	UQCC1	-0.0391456	5.01843	0.325918
ENSG00000153560	UBP1	-0.0447403	5.8559	0.325918
ENSG00000171659	GPR34	0.121821	2.38361	0.325918
ENSG00000218357	LL22NC03-75H12.2	-0.255769	-1.49251	0.325918
ENSG00000266980	RP11-552F3.4	0.204858	-1.53021	0.325918
ENSG00000227053	RP11-395B7.4	0.211226	-2.0731	0.326256
ENSG00000182853	VMO1	0.224955	-0.972836	0.327517
ENSG00000223653	RP11-131L23.1	-0.217239	-1.59692	0.327517
ENSG00000179218	CALR	0.0488031	6.88792	0.327901
ENSG00000244479	OR2A1-AS1	-0.154183	0.856731	0.327959
ENSG00000133131	MORC4	-0.0645177	3.16264	0.328165
ENSG00000197409	HIST1H3D	0.084537	4.74033	0.328199
ENSG00000010310	GIPR	0.110609	0.929615	0.328226
ENSG00000021300	PLEKHB1	-0.0844577	2.68211	0.328226
ENSG00000089041	P2RX7	0.0615307	4.71315	0.328226
ENSG00000099194	SCD	0.109748	1.83786	0.328226
ENSG00000112419	PHACTR2	-0.0521836	5.93415	0.328226
ENSG00000112578	BYSL	0.0727853	2.2588	0.328226
ENSG00000121089	NACA3P	0.236481	-0.737493	0.328226
ENSG00000122223	CD244	0.0573378	5.88414	0.328226
ENSG00000139173	TMEM117	-0.0771717	2.08488	0.328226
ENSG00000145996	CDKAL1	-0.0350337	5.42638	0.328226
ENSG00000150625	GPM6A	-0.311498	-0.184245	0.328226
ENSG00000152413	HOMER1	-0.104872	1.37477	0.328226
ENSG00000164182	NDUFAF2	-0.0994004	1.27342	0.328226
ENSG00000170836	PPM1D	-0.0347699	4.90376	0.328226
ENSG00000178623	GPR35	-0.0899682	2.09889	0.328226
ENSG00000185728	YTHDF3	-0.0271286	7.16297	0.328226
ENSG00000198824	CHAMP1	-0.0580721	3.19646	0.328226
ENSG00000214018	RRM2P3	0.123539	0.748973	0.328226
ENSG00000214626	POLR3DP1	-0.179141	-0.249453	0.328226
ENSG00000215840	RP11-122G18.7	-0.125594	0.408735	0.328226
ENSG00000225264	ZNRF2P2	-0.202584	-2.25612	0.328226
ENSG00000229124	VIM-AS1	0.0429374	5.02537	0.328226
ENSG00000229151	RP11-348F1.3	-0.132384	0.905989	0.328226
ENSG00000232656	IDI2-AS1	-0.211235	-1.77851	0.328226
ENSG00000237298	TTN-AS1	0.0541202	7.26064	0.328226
ENSG00000239396	RN7SL414P	0.204576	-1.84658	0.328226
ENSG00000267216	AC010642.1	0.0658673	2.0719	0.328226
ENSG00000275131	CH17-472G23.4	-0.0689283	4.80444	0.328226
ENSG00000277632	CCL3	0.135436	1.49356	0.328226
ENSG00000278972	CTD-3022L24.1	-0.113405	2.00045	0.328226
ENSG00000280730	AC090181.1	0.216789	-1.87455	0.328226
ENSG00000049192	ADAMTS6	-0.110202	2.03694	0.328801
ENSG00000119285	HEATR1	-0.0366454	6.56495	0.329231
ENSG00000135905	DOCK10	-0.045597	8.53889	0.329231
ENSG00000164885	CDK5	0.0675502	2.58223	0.329231
ENSG00000273542	HIST1H4K	0.151166	-0.015445	0.329231
ENSG00000197385	ZNF860	-0.16339	2.78196	0.329239
ENSG00000113319	RASGRF2	-0.0735352	5.45947	0.3299
ENSG00000242134	RPL5P13	-0.138907	0.883111	0.330047
ENSG00000139437	TCHP	0.0331348	5.04848	0.330264
ENSG00000267940	RP11-290F24.6	-0.0822004	2.1401	0.330264
ENSG00000144218	AFF3	-0.134684	5.04584	0.330884
ENSG00000257642	RP11-474B16.1	0.229494	-1.78938	0.331589
ENSG00000186141	POLR3C	0.0324063	4.82921	0.332319
ENSG00000069329	VPS35	-0.0328907	7.43575	0.333941
ENSG00000111215	PRR4	-0.0748389	3.24749	0.333941
ENSG00000136861	CDK5RAP2	-0.0368132	6.56179	0.333941
ENSG00000147872	PLIN2	0.0555153	5.5092	0.333941
ENSG00000158488	CD1E	0.182377	-0.269855	0.333941
ENSG00000163599	CTLA4	-0.0823406	3.15539	0.333941
ENSG00000168175	MAPK1IP1L	-0.0522657	5.52283	0.333941
ENSG00000173715	C11orf80	-0.0701791	3.01092	0.333941
ENSG00000211890	IGHA2	0.26754	2	0.333941
ENSG00000225963	AC009950.2	-0.1829	-0.85803	0.333941
ENSG00000226711	FAM66C	-0.0838673	2.06194	0.333941
ENSG00000228590	AC007381.3	-0.193641	-0.629541	0.333941
ENSG00000260816	RP11-319G9.3	-0.179426	1.24312	0.333941
ENSG00000278272	HIST1H3C	0.143191	2.45334	0.333941
ENSG00000162885	B3GALNT2	-0.0709153	3.4251	0.334683
ENSG00000213087	RP11-613F7.1	0.254354	-1.21819	0.335303
ENSG00000272341	RP1-151F17.2	-0.0976733	1.67858	0.335303
ENSG00000112182	BACH2	-0.0937353	5.64244	0.335377
ENSG00000136925	TSTD2	-0.0329985	4.61535	0.335377
ENSG00000270157	RP5-894A10.6	-0.0644179	3.57479	0.335558
ENSG00000273473	LL09NC01-139C3.1	0.193743	-1.3549	0.33589
ENSG00000160683	CXCR5	-0.119671	3.88604	0.336311
ENSG00000186352	ANKRD37	0.0986184	1.18673	0.336311
ENSG00000224616	RTCA-AS1	0.110939	1.17217	0.336311
ENSG00000211790	TRAV8-4	-0.112923	1.53804	0.338338
ENSG00000201098	RNY1	0.215445	7.23742	0.338803
ENSG00000228794	LINC01128	-0.0581576	4.19839	0.338803
ENSG00000158427	TMSB15B	-0.153442	-0.167664	0.340534
ENSG00000110871	COQ5	0.0741571	3.4267	0.340558
ENSG00000237249	RP1-102G20.2	-0.214279	-1.25887	0.340558
ENSG00000237499	RP11-356I2.4	-0.0740599	3.19962	0.340558
ENSG00000259630	CTD-2262B20.1	-0.11392	1.36019	0.340558
ENSG00000235505	RP11-693N9.2	-0.0822801	3.15143	0.340688
ENSG00000241106	HLA-DOB	-0.125962	3.21938	0.340688
ENSG00000275029	RP11-19G24.3	-0.191245	-1.11652	0.341143
ENSG00000271022	RP11-142I2.1	-0.138886	0.446253	0.341182
ENSG00000279656	RP11-298I3.6	-0.203315	-0.677353	0.341594
ENSG00000164830	OXR1	0.0525494	6.29489	0.341633
ENSG00000082516	GEMIN5	-0.0414389	4.8774	0.341958
ENSG00000165821	SALL2	-0.164315	-0.453521	0.341958
ENSG00000196352	CD55	-0.0584239	7.97143	0.341958
ENSG00000196565	HBG2	-0.367178	2.21242	0.341958
ENSG00000234327	AC012146.7	-0.14943	0.159832	0.341958
ENSG00000101335	MYL9	0.218587	1.05545	0.342549
ENSG00000027001	MIPEP	-0.049913	3.13931	0.3433
ENSG00000100095	SEZ6L	-0.139023	0.707584	0.343656
ENSG00000080546	SESN1	-0.0567176	5.40106	0.345151
ENSG00000145414	NAF1	-0.0620271	3.02499	0.345151
ENSG00000164663	USP49	0.0511375	3.94718	0.345151
ENSG00000279641	CTD-2545G14.6	0.150733	-0.500023	0.345151
ENSG00000092853	CLSPN	0.104644	1.52178	0.345234
ENSG00000100711	ZFYVE21	0.044506	3.81538	0.345234
ENSG00000115042	FAHD2A	0.0499983	3.20206	0.345234
ENSG00000239704	CDRT4	-0.144463	0.54858	0.345234
ENSG00000256690	RP11-727F15.9	0.172566	-0.768825	0.345234
ENSG00000075275	CELSR1	-0.14694	1.72632	0.345266
ENSG00000119737	GPR75	-0.0952516	1.81281	0.345266
ENSG00000135404	CD63	0.0517376	6.66943	0.345266
ENSG00000139211	AMIGO2	-0.0564934	3.55011	0.345266
ENSG00000231848	AC012354.8	0.163984	-2.63923	0.345266
ENSG00000249141	RP11-514O12.4	-0.191956	-0.955246	0.345266
ENSG00000267980	AC007292.6	0.153436	-0.751956	0.345266
ENSG00000234871	LINC01032	-0.222085	-1.38013	0.345861
ENSG00000148339	SLC25A25	0.0449462	4.11523	0.345921
ENSG00000256188	TAS2R30	-0.083958	3.65717	0.345921
ENSG00000269997	RP11-214K3.21	-0.0739203	2.34589	0.345921
ENSG00000259651	CTD-2330J20.1	-0.120954	2.96665	0.346313
ENSG00000259562	RP11-762H8.2	-0.0942998	1.05046	0.347194
ENSG00000136531	SCN2A	-0.21641	-2.22752	0.347229
ENSG00000164038	SLC9B2	-0.0556469	3.22157	0.347229
ENSG00000165650	PDZD8	-0.0505191	7.11052	0.347229
ENSG00000198624	CCDC69	0.0362945	7.06775	0.347425
ENSG00000270437	RP11-511I11.2	-0.223536	-1.90981	0.347425
ENSG00000119723	COQ6	-0.0410897	3.94043	0.347426
ENSG00000119326	CTNNAL1	0.168351	3.32669	0.347501
ENSG00000125249	RAP2A	0.0784542	5.72741	0.347501
ENSG00000125538	IL1B	-0.0760556	5.82226	0.347501
ENSG00000197149	RP11-452G18.2	-0.192576	2.53663	0.347501
ENSG00000128567	PODXL	-0.163444	-0.198472	0.348247
ENSG00000135482	ZC3H10	0.035543	4.8953	0.348247
ENSG00000181826	RELL1	0.0613116	5.26274	0.348247
ENSG00000241721	SUMO1P1	0.108284	1.5367	0.348247
ENSG00000064763	FAR2	0.0643448	5.78883	0.34953
ENSG00000168952	STXBP6	-0.232012	-2.07912	0.350342
ENSG00000277383	CTD-3001H11.2	0.151584	-0.435282	0.350342
ENSG00000182700	IGIP	-0.050982	4.0882	0.350934
ENSG00000231711	LINC00899	0.0745512	2.54211	0.350934
ENSG00000095794	CREM	-0.0565412	3.41565	0.351318
ENSG00000273703	HIST1H2BM	0.128114	2.27526	0.351666
ENSG00000128016	ZFP36	0.053557	6.01185	0.352572
ENSG00000135372	NAT10	-0.039691	5.25685	0.354386
ENSG00000246223	LINC01550	-0.0783591	4.9197	0.354386
ENSG00000127362	TAS2R3	-0.108186	2.07904	0.354634
ENSG00000086475	SEPHS1	-0.0333395	4.45126	0.355012
ENSG00000074657	ZNF532	-0.074169	3.71423	0.355078
ENSG00000101473	ACOT8	0.0343255	4.52728	0.355078
ENSG00000135127	CCDC64	-0.0627847	3.67333	0.355078
ENSG00000135945	REV1	-0.0307799	6.0122	0.355078
ENSG00000185432	METTL7A	0.0512597	6.23451	0.355078
ENSG00000204356	NELFE	0.0416266	5.06342	0.355078
ENSG00000206127	GOLGA8O	0.22653	-0.987499	0.355078
ENSG00000244671	RN7SL280P	0.173952	-0.9073	0.355078
ENSG00000248643	RBM14-RBM4	-0.0640456	2.52711	0.355078
ENSG00000274695	RP11-21K12.3	0.18812	-1.58451	0.355966
ENSG00000171596	NMUR1	0.12374	2.90581	0.356848
ENSG00000008869	HEATR5B	-0.0319562	7.11039	0.356982
ENSG00000130772	MED18	0.0444724	4.40539	0.356982
ENSG00000134901	KDELC1	-0.180244	-0.62804	0.356982
ENSG00000135823	STX6	-0.0285544	6.22036	0.356982
ENSG00000197561	ELANE	0.223477	-0.462134	0.356982
ENSG00000281469	RP11-567F11.1	-0.0992773	1.81192	0.356982
ENSG00000196428	TSC22D2	-0.0346541	5.34413	0.357022
ENSG00000211801	TRAV21	-0.114854	1.69694	0.357103
ENSG00000011523	CEP68	-0.053181	4.77712	0.358128
ENSG00000124635	HIST1H2BJ	0.0771279	4.43099	0.358128
ENSG00000181929	PRKAG1	0.0378186	5.30709	0.358128
ENSG00000178761	FAM219B	0.0339352	5.71037	0.358275
ENSG00000080561	MID2	-0.0818089	2.65363	0.358642
ENSG00000215788	TNFRSF25	-0.0774153	4.82634	0.358642
ENSG00000236296	GUSBP5	-0.180399	0.499847	0.358642
ENSG00000089685	BIRC5	0.178625	-0.181194	0.359248
ENSG00000108187	PBLD	0.0667973	1.91351	0.359248
ENSG00000116127	ALMS1	-0.0434221	7.24599	0.359248
ENSG00000150672	DLG2	-0.130919	0.369211	0.359248
ENSG00000163687	DNASE1L3	-0.186519	-0.262637	0.359248
ENSG00000170417	TMEM182	-0.077929	1.80929	0.359248
ENSG00000174953	DHX36	-0.0395004	6.44152	0.359248
ENSG00000188542	DUSP28	0.0493611	3.33448	0.359248
ENSG00000211592	IGKC	0.164684	5.49218	0.359248
ENSG00000215199	YWHAZP6	0.165806	-2.17339	0.359248
ENSG00000224547	ZNF619P1	-0.209294	-2.38462	0.359248
ENSG00000272221	XXbac-BPG181B23.7	-0.140956	2.03796	0.359248
ENSG00000236576	RP11-22B10.3	-0.133495	1.50489	0.360868
ENSG00000237927	RP3-393E18.2	-0.164357	0.521208	0.360868
ENSG00000068028	RASSF1	0.0553937	6.29266	0.361796
ENSG00000070915	SLC12A3	-0.195213	-0.8361	0.361796
ENSG00000072694	FCGR2B	0.107989	4.71302	0.361796
ENSG00000074527	NTN4	-0.222998	-0.23835	0.361796
ENSG00000102531	FNDC3A	-0.031534	6.63402	0.361796
ENSG00000104970	KIR3DX1	0.209583	-0.281147	0.361796
ENSG00000106397	PLOD3	0.0582559	3.59529	0.361796
ENSG00000112365	ZBTB24	-0.0318267	5.53049	0.361796
ENSG00000117318	ID3	-0.103986	2.51044	0.361796
ENSG00000128268	MGAT3	0.115738	1.65224	0.361796
ENSG00000134954	ETS1	-0.0464963	9.11105	0.361796
ENSG00000137502	RAB30	-0.0859523	4.40526	0.361796
ENSG00000140950	TLDC1	0.0543345	3.75359	0.361796
ENSG00000150076	CCDC7	-0.0988568	2.10716	0.361796
ENSG00000163093	BBS5	-0.17424	-0.936468	0.361796
ENSG00000184260	HIST2H2AC	0.0762737	6.04205	0.361796
ENSG00000205089	CCNI2	-0.102744	1.24038	0.361796
ENSG00000206199	ANKUB1	0.122916	1.79162	0.361796
ENSG00000208028	MIR616	0.167868	-0.731329	0.361796
ENSG00000211727	TRBV7-6	-0.181079	-0.0407521	0.361796
ENSG00000211893	IGHG2	0.246666	1.82904	0.361796
ENSG00000225194	LINC00092	0.194765	-1.6155	0.361796
ENSG00000229769	TRBV10-2	-0.238972	-0.74642	0.361796
ENSG00000234788	HSPA8P3	0.184688	-1.13343	0.361796
ENSG00000248544	CTB-47B11.3	0.192682	-1.11808	0.361796
ENSG00000249685	RP11-360F5.3	-0.136278	0.448284	0.361796
ENSG00000253210	RP11-809O17.1	0.0859997	2.06387	0.361796
ENSG00000259671	RP11-925D8.6	-0.125556	2.60168	0.361796
ENSG00000262652	RP13-638C3.2	-0.204961	-1.09488	0.361796
ENSG00000279131	AC069063.1	-0.127453	0.934827	0.361796
ENSG00000279207	RP11-159D12.8	-0.0600559	3.45184	0.361796
ENSG00000279356	RP11-429P3.8	-0.0885188	1.5344	0.361796
ENSG00000117305	HMGCL	0.0320343	4.47211	0.363227
ENSG00000146376	ARHGAP18	0.0607864	5.24083	0.363227
ENSG00000181031	RPH3AL	-0.121652	0.503215	0.363227
ENSG00000212993	POU5F1B	-0.11849	0.754996	0.36349
ENSG00000108784	NAGLU	0.059391	3.09297	0.363516
ENSG00000211655	IGLV1-36	0.242569	-1.90644	0.363516
ENSG00000129538	RNASE1	0.24471	-1.70052	0.364102
ENSG00000243753	HLA-L	0.150875	3.39531	0.364274
ENSG00000128309	MPST	0.0705411	3.66801	0.364721
ENSG00000163453	IGFBP7	0.0843244	3.19155	0.364721
ENSG00000164164	OTUD4	-0.042897	6.16597	0.364721
ENSG00000275993	CH507-42P11.8	-0.22125	-1.12948	0.364721
ENSG00000140948	ZCCHC14	-0.0558127	3.99251	0.364863
ENSG00000152127	MGAT5	-0.0383248	6.93789	0.364863
ENSG00000153064	BANK1	-0.110815	5.9234	0.364863
ENSG00000155729	KCTD18	0.0297713	4.87472	0.364863
ENSG00000197054	ZNF763	0.0780173	2.31296	0.364863
ENSG00000204934	ATP6V0E2-AS1	-0.0880622	2.33419	0.364863
ENSG00000238000	RP11-274E7.2	0.193584	-1.27822	0.364863
ENSG00000240859	AC093627.10	0.0855046	2.18496	0.364863
ENSG00000261254	RP4-714D9.5	-0.0888137	2.15934	0.364863
ENSG00000269145	AC007192.6	0.195445	-1.93417	0.364863
ENSG00000167536	DHRS13	-0.067245	5.05927	0.364872
ENSG00000133169	BEX1	0.219985	-2.14344	0.365564
ENSG00000213085	CFAP45	0.102833	2.73038	0.365564
ENSG00000241043	GVQW1	-0.165644	-0.677031	0.365564
ENSG00000254272	RP11-382J24.2	-0.0930946	1.87461	0.365564
ENSG00000135426	TESPA1	-0.0634841	6.05941	0.366258
ENSG00000161381	PLXDC1	-0.100225	2.63156	0.36726
ENSG00000230772	VN1R108P	-0.141284	-0.0833945	0.367489
ENSG00000235330	RP11-165F24.2	-0.182034	-0.938507	0.367527
ENSG00000100097	LGALS1	0.076933	6.09812	0.367701
ENSG00000135749	PCNXL2	-0.0514326	6.07344	0.367701
ENSG00000171295	ZNF440	0.0477532	4.63964	0.367701
ENSG00000218582	GAPDHP63	0.182589	-1.58864	0.367701
ENSG00000272982	RP5-1180E21.4	-0.173908	-0.768867	0.367701
ENSG00000232389	RP11-134K13.2	0.15207	-2.53071	0.367941
ENSG00000242457	RBBP4P2	0.173017	-2.18561	0.367941
ENSG00000176407	KCMF1	0.0224225	6.3016	0.368109
ENSG00000127152	BCL11B	-0.0472092	7.14337	0.368122
ENSG00000177374	HIC1	-0.112432	1.39175	0.368122
ENSG00000260236	RP11-708J19.1	0.0888286	1.49033	0.369359
ENSG00000114988	LMAN2L	0.039598	3.70203	0.369547
ENSG00000130635	COL5A1	-0.21354	-1.92761	0.369547
ENSG00000155016	CYP2U1	-0.0534274	3.70073	0.369547
ENSG00000168813	ZNF507	-0.0376075	5.99505	0.369547
ENSG00000184270	HIST2H2AB	0.0835808	3.52807	0.369547
ENSG00000214797	RP11-1036E20.9	-0.197001	-0.605175	0.369547
ENSG00000217275	RP1-34B20.4	0.153329	0.211279	0.369547
ENSG00000227268	KLLN	0.0889649	1.50944	0.369547
ENSG00000236209	AC104135.2	0.296195	-1.67065	0.369547
ENSG00000069020	MAST4	-0.0705006	4.3106	0.369728
ENSG00000103550	KNOP1	-0.0390321	4.20285	0.369728
ENSG00000182508	LHFPL1	-0.19644	-1.47225	0.369728
ENSG00000198720	ANKRD13B	0.183243	-1.56963	0.369728
ENSG00000215158	RP11-1023L17.1	-0.0589335	4.53371	0.369728
ENSG00000276015	KCNQ1OT1_5	-0.127357	1.05253	0.369728
ENSG00000240505	TNFRSF13B	-0.186884	0.236438	0.370052
ENSG00000256720	RP11-436I9.6	-0.125235	3.38195	0.370643
ENSG00000087269	NOP14	-0.0345634	5.03973	0.371261
ENSG00000108406	DHX40	0.045027	5.8918	0.371261
ENSG00000133048	CHI3L1	-0.168941	6.12561	0.371261
ENSG00000152463	OLAH	0.237591	-1.56139	0.371261
ENSG00000172340	SUCLG2	-0.0384598	5.57234	0.371261
ENSG00000178947	LINC00086	-0.144874	0.00885019	0.371261
ENSG00000186153	WWOX	-0.0570664	3.61133	0.371261
ENSG00000206557	TRIM71	-0.212379	-1.83375	0.371261
ENSG00000225345	SNX18P3	-0.140464	1.13191	0.371261
ENSG00000248626	GAPDHP40	0.16201	-2.15977	0.371261
ENSG00000257243	RP11-133N21.7	-0.185494	-1.12357	0.371261
ENSG00000259248	USP3-AS1	-0.100315	1.00514	0.371261
ENSG00000260727	SLC7A5P1	-0.124096	-0.387774	0.371261
ENSG00000111640	GAPDH	0.0566422	9.5419	0.371308
ENSG00000253522	CTC-231O11.1	-0.0797308	2.73317	0.371863
ENSG00000076513	ANKRD13A	0.0300383	8.41245	0.372057
ENSG00000222482	AC005071.1	0.137625	-0.825058	0.372083
ENSG00000235613	NSRP1P1	-0.107997	0.8762	0.372083
ENSG00000244682	FCGR2C	0.110245	5.88494	0.372363
ENSG00000174928	C3orf33	-0.134368	0.221062	0.372966
ENSG00000140718	FTO	-0.0428698	5.25663	0.373533
ENSG00000142227	EMP3	0.0519037	6.59033	0.373533
ENSG00000177283	FZD8	-0.199694	-1.70369	0.373533
ENSG00000211845	TRAJ44	-0.0889215	1.62345	0.373533
ENSG00000134007	ADAM20	-0.118198	1.62008	0.374462
ENSG00000182718	ANXA2	0.0475017	7.86501	0.374462
ENSG00000204386	NEU1	0.0441816	5.20518	0.374462
ENSG00000258760	CTD-2509G16.5	-0.217475	-1.17735	0.375344
ENSG00000197006	METTL9	0.059866	7.08899	0.376066
ENSG00000259856	RAB43P1	0.163674	-0.82537	0.376345
ENSG00000210112	MT-TM	0.19003	-0.968496	0.377197
ENSG00000101752	MIB1	0.0355548	6.92664	0.377958
ENSG00000147650	LRP12	0.0896883	2.19304	0.377958
ENSG00000141505	ASGR1	0.0761932	2.47821	0.378073
ENSG00000225091	SNORA71A	0.137872	2.49955	0.378073
ENSG00000267430	RP11-635N19.2	-0.0502371	3.47885	0.378073
ENSG00000115221	ITGB6	0.0698812	1.66465	0.379612
ENSG00000165733	BMS1	-0.0350097	5.71954	0.379612
ENSG00000272263	RP11-767C1.2	-0.179113	-1.08621	0.381254
ENSG00000122224	LY9	-0.0437501	5.76908	0.38233
ENSG00000155876	RRAGA	0.0369508	5.22688	0.38233
ENSG00000198467	TPM2	-0.104632	1.76224	0.38233
ENSG00000240382	IGKV1-17	0.246171	-0.294141	0.38233
ENSG00000105974	CAV1	0.213773	-1.76281	0.383326
ENSG00000055917	PUM2	-0.0277964	8.13833	0.383506
ENSG00000143494	VASH2	-0.202428	-2.25564	0.383506
ENSG00000201662	RNU6-60P	-0.146329	-0.443498	0.383506
ENSG00000215018	COL28A1	-0.19869	-1.81591	0.383506
ENSG00000273680	RP11-996F15.6	-0.0844727	1.95686	0.383506
ENSG00000274598	RP11-423G4.10	-0.170621	-0.185764	0.383506
ENSG00000211838	TRAJ52	-0.108139	0.920209	0.383988
ENSG00000119771	KLHL29	-0.171052	-0.308681	0.38425
ENSG00000080986	NDC80	0.0837186	2.31286	0.384334
ENSG00000158467	AHCYL2	-0.0490645	4.54712	0.384334
ENSG00000165389	SPTSSA	0.0693943	3.0951	0.384334
ENSG00000213500	LAP3P2	0.173552	-2.29949	0.384334
ENSG00000260464	RP4-561L24.3	-0.150705	-0.335036	0.384452
ENSG00000107077	KDM4C	-0.0375536	5.66167	0.384681
ENSG00000115738	ID2	0.0563508	5.88443	0.384681
ENSG00000134371	CDC73	-0.0305888	6.31252	0.384681
ENSG00000164002	EXO5	0.0556214	3.3386	0.384681
ENSG00000165392	WRN	-0.041295	4.92502	0.384681
ENSG00000170365	SMAD1	0.104928	2.10477	0.384681
ENSG00000171169	NAIF1	0.046475	3.73861	0.384681
ENSG00000171867	PRNP	0.0466509	6.09632	0.384681
ENSG00000188460	ACTBP11	0.16907	-2.35079	0.384681
ENSG00000224316	RP11-479O9.2	0.184282	-1.65374	0.384681
ENSG00000237505	PKN2-AS1	0.185625	-1.49199	0.384681
ENSG00000248521	RP11-174F8.1	-0.102809	0.513933	0.384681
ENSG00000250982	RP11-159J3.1	0.257787	-2.74321	0.384681
ENSG00000253570	RNF5P1	0.21792	-0.483235	0.384681
ENSG00000260645	RP11-250B2.5	-0.162215	-0.426523	0.384681
ENSG00000261416	RP11-455F5.5	0.137246	-0.55941	0.384681
ENSG00000280213	UCKL1-AS1	0.119854	0.368385	0.384681
ENSG00000133250	ZNF414	0.117829	0.0668983	0.384975
ENSG00000271109	CTC-523E23.11	-0.0780104	2.27596	0.384975
ENSG00000108010	GLRX3	-0.0367435	4.87831	0.385222
ENSG00000170525	PFKFB3	-0.0724363	5.99641	0.385222
ENSG00000185104	FAF1	-0.0256753	5.72029	0.385222
ENSG00000198648	STK39	-0.0526687	5.05067	0.385222
ENSG00000244327	RP11-383G6.3	-0.13978	-0.198845	0.385222
ENSG00000254502	FNTAL1	0.14815	-2.60071	0.385222
ENSG00000261211	RP1-80N2.3	-0.147727	0.674108	0.385222
ENSG00000264247	LINC00909	0.0659777	4.55094	0.385222
ENSG00000271964	RP11-415F23.2	-0.0975855	2.89814	0.385352
ENSG00000175203	DCTN2	0.0304863	5.06658	0.385492
ENSG00000226179	LINC00685	0.146391	-0.582212	0.385492
ENSG00000257475	RP11-983P16.2	-0.0930288	0.82485	0.387377
ENSG00000175782	SLC35E3	0.0493166	4.74833	0.387809
ENSG00000215883	CYB5RL	-0.090098	1.71087	0.387809
ENSG00000261801	LOXL1-AS1	-0.0796551	1.70603	0.387809
ENSG00000275713	HIST1H2BH	0.0835391	4.04271	0.387809
ENSG00000279020	C18orf15	-0.214298	-1.49692	0.387809
ENSG00000180139	ACTA2-AS1	-0.0789137	3.08037	0.388154
ENSG00000221157	AC009196.1	-0.187339	-1.15125	0.388396
ENSG00000221514	SNORD111B	-0.188829	-2.34168	0.389172
ENSG00000139405	RITA1	0.0569676	2.92775	0.389966
ENSG00000107719	PALD1	0.159931	-0.524382	0.391424
ENSG00000235920	AC073109.2	0.201282	-2.34613	0.392329
ENSG00000224775	BRAFP1	-0.19161	-1.17586	0.392597
ENSG00000277427	XXbac-BPG154L12.5	-0.210526	-2.27551	0.393779
ENSG00000259394	RP11-244F12.1	0.176354	-2.26503	0.394437
ENSG00000166348	USP54	-0.0672533	2.07308	0.394783
ENSG00000198589	LRBA	-0.0380476	8.41607	0.394783
ENSG00000253519	AC106801.1	0.179329	-1.4344	0.394783
ENSG00000052802	MSMO1	0.0637239	3.81508	0.394825
ENSG00000121274	PAPD5	-0.0347712	5.15029	0.394825
ENSG00000151929	BAG3	-0.0865358	1.8263	0.394825
ENSG00000198874	TYW1	-0.0328774	4.53487	0.394825
ENSG00000250326	RP11-284M14.1	-0.104151	0.810115	0.394825
ENSG00000070882	OSBPL3	-0.0436189	5.73073	0.395247
ENSG00000155657	TTN	-0.0945037	8.42692	0.396196
ENSG00000160781	PAQR6	0.118415	1.09575	0.396196
ENSG00000162894	FAIM3	-0.0584713	5.41296	0.396196
ENSG00000163736	PPBP	0.135787	7.22245	0.396196
ENSG00000165138	ANKS6	-0.0583002	2.92347	0.396196
ENSG00000188938	FAM120AOS	0.0306829	5.65744	0.396196
ENSG00000196227	FAM217B	-0.0328041	5.52442	0.396196
ENSG00000278679	RP11-694O4.1	-0.134135	1.18714	0.396196
ENSG00000279456	RP11-87H9.5	-0.126368	0.55416	0.396196
ENSG00000145217	SLC26A1	0.180331	-1.86475	0.396201
ENSG00000197712	FAM114A1	0.0767038	1.79684	0.396201
ENSG00000186105	LRRC70	0.137332	0.0141499	0.396557
ENSG00000250848	CTD-2083E4.5	0.16898	-2.0323	0.396557
ENSG00000137413	TAF8	0.0326109	5.49487	0.396657
ENSG00000175164	ABO	-0.248445	-0.314138	0.397123
ENSG00000115425	PECR	0.0390046	3.8628	0.397498
ENSG00000233006	AC034220.3	-0.106159	1.36067	0.397559
ENSG00000228962	HCG23	-0.215767	-1.94103	0.397941
ENSG00000267519	CTD-3252C9.4	0.0676519	4.31849	0.398049
ENSG00000106546	AHR	0.0467862	7.02625	0.398512
ENSG00000155926	SLA	-0.0362793	9.19438	0.398512
ENSG00000162746	FCRLB	0.114978	0.450635	0.398512
ENSG00000260917	RP11-57H14.4	-0.0662906	3.68541	0.398512
ENSG00000272562	RP11-396C23.4	0.0705575	2.07889	0.398512
ENSG00000058600	POLR3E	-0.0335807	5.34303	0.398599
ENSG00000110713	NUP98	-0.0308918	8.36606	0.398599
ENSG00000136738	STAM	-0.0314521	5.28298	0.398599
ENSG00000137601	NEK1	-0.0530708	4.6091	0.398599
ENSG00000161048	NAPEPLD	-0.0444212	4.06964	0.398599
ENSG00000175806	MSRA	-0.0689054	3.85689	0.398599
ENSG00000178458	H3F3AP6	0.149789	-0.570718	0.398599
ENSG00000207297	SNORD7	0.150159	-0.620496	0.398599
ENSG00000211795	TRAV8-6	-0.0980831	1.91355	0.398599
ENSG00000272047	GTF2H5	-0.0700624	2.75513	0.398599
ENSG00000274678	RP11-2C24.7	0.18089	-2.14549	0.398599
ENSG00000273382	RP5-1065J22.8	0.0987512	1.57278	0.399125
ENSG00000244459	RP11-1398P2.1	0.119699	0.0628394	0.399165
ENSG00000079691	LRRC16A	-0.106491	3.56678	0.399799
ENSG00000270640	RP11-373D23.2	-0.0760951	2.18578	0.399799
ENSG00000162645	GBP2	0.0580456	8.88998	0.400122
ENSG00000137441	FGFBP2	0.130187	5.16413	0.400214
ENSG00000148308	GTF3C5	0.0432297	4.93745	0.400214
ENSG00000124575	HIST1H1D	0.0753684	6.51566	0.401318
ENSG00000185168	LINC00482	0.13885	0.0426107	0.40289
ENSG00000067369	TP53BP1	-0.0365632	6.04681	0.402922
ENSG00000138767	CNOT6L	-0.0372959	7.76025	0.402922
ENSG00000161643	SIGLEC16	0.154426	-0.262032	0.402922
ENSG00000269194	AC006942.4	0.114329	0.456442	0.40372
ENSG00000012232	EXTL3	-0.0516875	6.44067	0.404036
ENSG00000068137	PLEKHH3	0.175068	-2.23237	0.404036
ENSG00000165646	SLC18A2	0.110104	1.7875	0.404036
ENSG00000196628	TCF4	-0.0784401	5.39451	0.404036
ENSG00000211659	IGLV3-25	0.205775	1.192	0.404036
ENSG00000226501	USF1P1	-0.0875236	1.462	0.404321
ENSG00000151491	EPS8	0.102146	1.49293	0.406412
ENSG00000210107	MT-TQ	0.242933	-1.73204	0.407235
ENSG00000005381	MPO	0.155223	1.82243	0.407677
ENSG00000107281	NPDC1	0.129307	1.86424	0.407677
ENSG00000119599	DCAF4	-0.0647016	2.96592	0.407677
ENSG00000211794	TRAV12-3	-0.102579	2.00578	0.408194
ENSG00000110066	SUV420H1	0.0222154	6.82315	0.408653
ENSG00000162976	PQLC3	0.0477407	5.21823	0.408731
ENSG00000126249	PDCD2L	-0.0979777	0.785603	0.409456
ENSG00000138180	CEP55	0.167221	-0.0136969	0.409456
ENSG00000138593	SECISBP2L	-0.033891	6.38389	0.409456
ENSG00000166704	ZNF606	0.0458504	4.22015	0.409456
ENSG00000249042	CTD-2015H6.3	0.17595	-1.33675	0.409456
ENSG00000278493	CTD-2382E5.6	-0.17466	-1.42769	0.409456
ENSG00000277157	HIST1H4D	0.0927708	4.08863	0.409928
ENSG00000263417	GTSCR1	-0.214014	-0.748718	0.410307
ENSG00000047249	ATP6V1H	-0.0259638	5.28414	0.410747
ENSG00000072858	SIDT1	-0.0439825	5.85464	0.410747
ENSG00000118503	TNFAIP3	-0.0501958	5.68137	0.410747
ENSG00000139160	METTL20	0.0778757	1.58521	0.410747
ENSG00000158417	EIF5B	-0.0362008	5.21089	0.410747
ENSG00000163625	WDFY3	-0.0640051	8.58548	0.410747
ENSG00000188825	LINC00910	0.0612175	2.60833	0.410747
ENSG00000198815	FOXJ3	-0.0474993	5.88554	0.410747
ENSG00000205084	TMEM231	-0.136571	-0.230539	0.410747
ENSG00000221432	AC079834.2	0.19368	-2.31535	0.410747
ENSG00000233184	RP11-421L21.3	-0.0678259	3.2798	0.410747
ENSG00000233892	PAIP1P1	-0.1318	0.0478103	0.410747
ENSG00000275910	RP11-680G24.6	-0.201142	-0.579434	0.410747
ENSG00000277075	HIST1H2AE	0.0739339	4.48358	0.410747
ENSG00000279077	RP11-800A18.3	-0.072677	2.42562	0.410747
ENSG00000090104	RGS1	-0.164164	0.935075	0.410815
ENSG00000114737	CISH	0.071937	5.22094	0.410815
ENSG00000150477	KIAA1328	-0.0484795	4.13039	0.410815
ENSG00000179915	NRXN1	-0.139726	1.22311	0.410815
ENSG00000187912	CLEC17A	-0.138589	2.56168	0.410815
ENSG00000202198	RN7SK	0.082602	14.6692	0.410815
ENSG00000233797	UFL1-AS1	-0.170507	-1.11552	0.411444
ENSG00000185933	CALHM1	0.187532	-2.2755	0.411671
ENSG00000270055	CTD-3092A11.2	-0.137438	2.46707	0.411671
ENSG00000170558	CDH2	-0.191068	0.720344	0.411995
ENSG00000182487	NCF1B	0.0788288	5.40047	0.411995
ENSG00000236438	FAM157A	-0.110027	3.78127	0.411995
ENSG00000161013	MGAT4B	0.048905	5.17233	0.413881
ENSG00000152492	CCDC50	-0.0648606	5.52191	0.414658
ENSG00000253476	RP11-395I14.2	-0.082467	1.19378	0.41644
ENSG00000266378	RP11-214O1.3	-0.118908	1.18913	0.416539
ENSG00000007047	MARK4	0.0580858	3.03856	0.416691
ENSG00000083812	ZNF324	0.041706	4.21145	0.416691
ENSG00000141562	NARF	0.0407039	5.78973	0.416691
ENSG00000146285	SCML4	-0.0462541	6.2987	0.416691
ENSG00000169432	SCN9A	-0.110836	2.46343	0.416691
ENSG00000213453	FTH1P3	0.159637	-0.995888	0.416691
ENSG00000277449	CEBPB-AS1	0.0973385	0.685272	0.416691
ENSG00000278236	uc_338	0.101048	0.461782	0.416691
ENSG00000185808	PIGP	-0.0533601	3.07664	0.416999
ENSG00000213638	ADAT3	0.134562	-1.24203	0.417402
ENSG00000216937	CCDC7	-0.0611235	4.09016	0.417402
ENSG00000244642	RN7SL396P	0.135189	2.43777	0.417402
ENSG00000254614	AP003068.23	0.11848	2.88423	0.417402
ENSG00000260943	RP11-476D10.1	0.15747	0.770495	0.417402
ENSG00000211842	TRAJ47	-0.0989228	0.952545	0.418009
ENSG00000008277	ADAM22	-0.0666419	3.20833	0.418418
ENSG00000064201	TSPAN32	0.0596132	5.07124	0.418418
ENSG00000073849	ST6GAL1	-0.0372057	7.41389	0.418418
ENSG00000093010	COMT	0.0504465	4.50858	0.418418
ENSG00000106780	MEGF9	-0.0513671	8.37428	0.418418
ENSG00000109452	INPP4B	-0.0654938	7.71009	0.418418
ENSG00000111962	UST	-0.0693415	3.19836	0.418418
ENSG00000119685	TTLL5	-0.0600811	4.4702	0.418418
ENSG00000124587	PEX6	0.0692554	4.63385	0.418418
ENSG00000125551	PLGLB2	0.228548	0.140316	0.418418
ENSG00000130348	QRSL1	-0.0460187	4.68599	0.418418
ENSG00000131037	EPS8L1	-0.157756	-0.684523	0.418418
ENSG00000139187	KLRG1	-0.0997454	5.54869	0.418418
ENSG00000143297	FCRL5	-0.18501	4.5633	0.418418
ENSG00000147036	LANCL3	0.096774	2.10908	0.418418
ENSG00000158966	CACHD1	-0.175253	0.22684	0.418418
ENSG00000162694	EXTL2	-0.0715891	2.17867	0.418418
ENSG00000163935	SFMBT1	-0.0461863	4.51896	0.418418
ENSG00000164162	ANAPC10	-0.0583868	3.0865	0.418418
ENSG00000166192	SENP8	-0.116967	0.122535	0.418418
ENSG00000168818	STX18	-0.0312661	4.45785	0.418418
ENSG00000185009	AP3M1	0.0271018	6.16052	0.418418
ENSG00000203814	HIST2H2BF	0.0541945	5.90382	0.418418
ENSG00000206605	RNU6-946P	-0.157628	-0.14057	0.418418
ENSG00000213033	AURKAPS1	-0.0908974	0.874737	0.418418
ENSG00000214279	SCART1	-0.112819	2.36111	0.418418
ENSG00000223336	RNU2-6P	-0.113927	0.499143	0.418418
ENSG00000227097	RPS28P7	0.270077	3.34481	0.418418
ENSG00000227603	RP11-165J3.6	0.116096	0.501769	0.418418
ENSG00000230091	TMEM254-AS1	-0.170455	-0.947467	0.418418
ENSG00000233646	OR52T1P	-0.199495	-1.3022	0.418418
ENSG00000236269	ENO1-IT1	0.105428	0.415558	0.418418
ENSG00000236519	LINC01424	0.142616	-0.469854	0.418418
ENSG00000245904	RP11-796E2.4	-0.0710247	2.45165	0.418418
ENSG00000254789	RP11-531H8.2	-0.206192	0.954189	0.418418
ENSG00000256673	RP11-599J14.2	0.190506	-1.88414	0.418418
ENSG00000257043	RP11-137N23.1	0.151736	-2.45017	0.418418
ENSG00000258768	CTD-2292M16.8	-0.13148	0.63295	0.418418
ENSG00000259379	RP11-925D8.5	-0.132975	2.92539	0.418418
ENSG00000260941	LINC00622	-0.186032	-1.31314	0.418418
ENSG00000268734	CTB-61M7.2	-0.078576	2.69808	0.418418
ENSG00000269858	EGLN2	0.0409267	5.93758	0.418418
ENSG00000271858	CYB561D2	-0.0938597	1.17038	0.418418
ENSG00000274487	CH17-431G21.1	0.134414	-0.313913	0.418418
ENSG00000275066	SYNRG	-0.0343405	7.58129	0.418418
ENSG00000277224	HIST1H2BF	0.0704367	3.9506	0.418418
ENSG00000279319	RP11-693M3.1	-0.117769	1.43504	0.418418
ENSG00000279670	RP11-70L8.5	-0.095992	1.56041	0.418418
ENSG00000263426	RN7SL471P	0.173885	-2.21281	0.418932
ENSG00000184205	TSPYL2	-0.0524038	3.86265	0.419336
ENSG00000275393	RP11-568J23.8	-0.18414	-1.18237	0.419351
ENSG00000280670	CCDC163P	0.193781	-0.12084	0.419351
ENSG00000227500	SCAMP4	0.081102	1.70211	0.419456
ENSG00000196436	NPIPB15	0.255236	-1.05013	0.420251
ENSG00000214070	AC011999.1	0.182818	-2.20194	0.420251
ENSG00000131653	TRAF7	0.0490538	4.78347	0.420303
ENSG00000135040	NAA35	-0.0341336	4.77748	0.420303
ENSG00000135480	KRT7	0.187539	-2.38235	0.420303
ENSG00000171224	C10orf35	-0.152264	-0.520399	0.420303
ENSG00000196369	SRGAP2B	0.068824	2.76423	0.420303
ENSG00000261618	RP11-79H23.3	-0.168751	-0.53858	0.420303
ENSG00000276494	KCNQ1OT1_3	-0.137574	0.279406	0.420303
ENSG00000259626	RP11-925D8.2	-0.118408	2.04852	0.420442
ENSG00000127483	HP1BP3	-0.0222298	7.95524	0.420604
ENSG00000127804	METTL16	-0.0428689	4.46526	0.420604
ENSG00000136003	ISCU	0.0443863	6.8386	0.420604
ENSG00000145358	DDIT4L	0.229381	-2.05536	0.420604
ENSG00000178814	OPLAH	0.108029	1.70735	0.420604
ENSG00000198715	GLMP	0.0764727	2.84717	0.420604
ENSG00000178445	GLDC	0.2501	-1.18622	0.42067
ENSG00000119946	CNNM1	0.198179	-2.06463	0.421118
ENSG00000262402	RP11-667K14.8	-0.187118	-1.45551	0.421118
ENSG00000172878	METAP1D	-0.0776632	1.85904	0.421513
ENSG00000238084	RP3-469D22.1	0.155159	-2.07054	0.421554
ENSG00000125124	BBS2	-0.050704	5.18919	0.422088
ENSG00000150995	ITPR1	-0.0439892	7.57791	0.422088
ENSG00000163624	CDS1	-0.159217	-0.674785	0.422088
ENSG00000211653	IGLV1-40	0.193668	1.07622	0.422088
ENSG00000234129	RP11-120D5.1	-0.124017	0.617207	0.422088
ENSG00000181192	DHTKD1	0.0339361	5.94579	0.422178
ENSG00000170144	HNRNPA3	-0.0406501	7.01983	0.422347
ENSG00000211885	TRAJ4	-0.0787435	1.85847	0.422347
ENSG00000262470	TVP23CP2	-0.184985	-1.91306	0.422347
ENSG00000227076	RP11-4C20.4	-0.178315	-1.29768	0.422575
ENSG00000267320	AC005780.1	0.257601	-2.4891	0.422575
ENSG00000074276	CDHR2	0.0868648	1.28507	0.423576
ENSG00000244437	IGKV3-15	0.186338	0.424212	0.424112
ENSG00000005884	ITGA3	-0.0889615	1.33229	0.424393
ENSG00000094841	UPRT	-0.0362462	4.06667	0.424393
ENSG00000177425	PAWR	-0.103396	2.74845	0.424393
ENSG00000214192	UBE2V1P2	0.158329	-2.2826	0.424393
ENSG00000267060	PTGES3L	0.196034	-2.04407	0.424393
ENSG00000102043	MTMR8	-0.0517597	3.00155	0.424928
ENSG00000116819	TFAP2E	0.093115	0.502429	0.424928
ENSG00000147155	EBP	0.0581766	3.32149	0.424928
ENSG00000163689	C3orf67	-0.187047	-1.579	0.424928
ENSG00000168079	SCARA5	-0.20808	-1.80428	0.424928
ENSG00000184661	CDCA2	0.152584	-0.0369942	0.424928
ENSG00000198963	RORB	0.225454	-1.80099	0.424928
ENSG00000224934	RP11-441O15.3	-0.0753494	1.79283	0.424928
ENSG00000248677	CTD-2044J15.1	-0.170102	-1.26076	0.424928
ENSG00000259818	RP5-1024G6.7	0.179043	-2.25454	0.424928
ENSG00000276564	CTA-276F8.1	-0.0908444	1.53951	0.424928
ENSG00000279265	AC000123.3	-0.0714837	2.28555	0.424928
ENSG00000276256	AC011043.1	0.243161	-1.61604	0.425646
ENSG00000069535	MAOB	0.225256	-1.69076	0.426383
ENSG00000071575	TRIB2	-0.0481983	6.08999	0.426383
ENSG00000072364	AFF4	-0.0343945	7.28138	0.426383
ENSG00000094916	CBX5	-0.0650692	5.98793	0.426383
ENSG00000095585	BLNK	-0.104821	3.24077	0.426383
ENSG00000111371	SLC38A1	-0.0406051	8.68741	0.426383
ENSG00000114423	CBLB	-0.0522978	6.12943	0.426383
ENSG00000120915	EPHX2	-0.0836525	3.99025	0.426383
ENSG00000139974	SLC38A6	-0.0536286	3.54821	0.426383
ENSG00000141293	SKAP1	-0.0513137	4.85166	0.426383
ENSG00000149970	CNKSR2	-0.0784899	3.23108	0.426383
ENSG00000168894	RNF181	0.042759	4.71553	0.426383
ENSG00000169385	RNASE2	0.13214	3.52114	0.426383
ENSG00000171916	LGALS9C	0.199289	-0.392923	0.426383
ENSG00000178726	THBD	-0.10109	4.68981	0.426383
ENSG00000184292	TACSTD2	0.262713	-0.617742	0.426383
ENSG00000196154	S100A4	0.0521883	8.44675	0.426383
ENSG00000198538	ZNF28	0.0719788	4.22511	0.426383
ENSG00000204954	C12orf73	-0.066641	1.95791	0.426383
ENSG00000205041	CTC-425O23.2	-0.0811185	1.10179	0.426383
ENSG00000213830	CFL1P5	0.162996	-1.11896	0.426383
ENSG00000214812	RP5-1053E7.3	0.0969967	0.897347	0.426383
ENSG00000226057	PHF2P2	0.191159	-1.10196	0.426383
ENSG00000228037	RP3-395M20.9	-0.139357	-0.160304	0.426383
ENSG00000246084	CTD-2506J14.1	-0.0629408	3.32437	0.426383
ENSG00000259086	RP11-134E15.2	0.14445	-2.51227	0.426383
ENSG00000259137	RP11-305B6.1	0.151035	-2.56659	0.426383
ENSG00000259915	RP11-410E4.1	-0.151274	-0.0352308	0.426383
ENSG00000260923	AC137934.1	-0.175571	0.00303959	0.426383
ENSG00000267702	RP11-53B2.2	-0.0863917	4.6081	0.426383
ENSG00000272853	RP11-398C13.6	0.117783	-0.0974539	0.426383
ENSG00000272980	RP11-517H2.6	-0.100483	1.24401	0.426383
ENSG00000111252	SH2B3	-0.0383222	6.72772	0.426622
ENSG00000162065	TBC1D24	-0.0775881	1.92452	0.426622
ENSG00000185344	ATP6V0A2	0.0259919	5.81465	0.426622
ENSG00000187837	HIST1H1C	0.0710243	7.55089	0.426622
ENSG00000250995	RP13-128O4.3	0.102516	1.24742	0.426622
ENSG00000254952	AP001257.1	-0.113903	0.44893	0.426622
ENSG00000277539	RP11-298C2.1	-0.107667	2.30952	0.426622
ENSG00000277911	RP11-333J10.2	-0.16093	-0.578434	0.426622
ENSG00000086848	ALG9	-0.0503692	2.65211	0.426761
ENSG00000138443	ABI2	-0.0544709	4.78703	0.426761
ENSG00000175556	LONRF3	-0.0541127	3.58447	0.426761
ENSG00000068976	PYGM	-0.0745897	2.10564	0.426847
ENSG00000146054	TRIM7	0.10876	0.806115	0.426847
ENSG00000274929	RP11-165D7.5	0.0624607	2.15245	0.426847
ENSG00000254328	CTC-308K20.4	0.104203	0.200343	0.426996
ENSG00000123200	ZC3H13	-0.0275681	6.76158	0.427063
ENSG00000173436	MINOS1	-0.0368382	3.93151	0.427063
ENSG00000137944	CCBL2	-0.0452683	4.31531	0.427522
ENSG00000070190	DAPP1	0.0418891	7.4773	0.427955
ENSG00000256427	RP11-118B22.4	-0.138086	1.46639	0.428789
ENSG00000259429	UBE2Q2P2	-0.111108	0.928243	0.428789
ENSG00000120162	MOB3B	-0.0710734	2.95456	0.42903
ENSG00000279494	RP11-494O16.4	0.142052	-0.589219	0.429404
ENSG00000234134	RP11-383C5.5	0.1465	-0.599052	0.429907
ENSG00000136603	SKIL	-0.0482019	5.76996	0.430058
ENSG00000066855	MTFR1	0.0562669	2.70097	0.43062
ENSG00000129422	MTUS1	-0.162259	1.96303	0.43062
ENSG00000168004	HRASLS5	-0.131668	0.156808	0.43062
ENSG00000018699	TTC27	-0.0351168	4.48611	0.431138
ENSG00000071889	FAM3A	0.0582978	3.21436	0.431138
ENSG00000075223	SEMA3C	0.0637913	4.04594	0.431138
ENSG00000115368	WDR75	-0.0421872	5.55078	0.431138
ENSG00000116641	DOCK7	-0.0581767	4.08254	0.431138
ENSG00000119977	TCTN3	-0.0373228	3.71535	0.431138
ENSG00000152990	GPR125	-0.121872	1.5534	0.431138
ENSG00000171033	PKIA	-0.0815797	3.43519	0.431138
ENSG00000177352	CCDC71	0.0471163	4.0962	0.431138
ENSG00000215271	HOMEZ	0.0305517	4.23105	0.431138
ENSG00000271895	RP4-635E18.8	-0.069814	1.58648	0.431138
ENSG00000090924	PLEKHG2	0.0601141	3.29232	0.432107
ENSG00000119698	PPP4R4	-0.170826	0.777216	0.432107
ENSG00000134453	RBM17	-0.0245254	5.99353	0.432107
ENSG00000136932	C9orf156	-0.0295223	5.69324	0.432107
ENSG00000141510	TP53	-0.0471031	3.77877	0.432107
ENSG00000171595	DNAI2	0.144925	-0.259121	0.432107
ENSG00000172403	SYNPO2	-0.132312	0.542138	0.432107
ENSG00000176720	BOK	0.215848	-1.24742	0.432107
ENSG00000240527	RP11-429G19.3	-0.134197	0.195758	0.432107
ENSG00000247982	LINC00926	-0.131398	4.633	0.432107
ENSG00000248121	SMURF2P1	0.134423	-0.490976	0.432107
ENSG00000278588	HIST1H2BI	0.0957875	3.34982	0.432107
ENSG00000102032	RENBP	0.0593522	3.36071	0.432111
ENSG00000136826	KLF4	0.0539437	4.49055	0.432111
ENSG00000251405	CTB-109A12.1	0.180311	-2.35844	0.432111
ENSG00000264663	KRT8P34	-0.0790655	1.83436	0.432111
ENSG00000197296	FITM2	-0.0532471	2.8253	0.432288
ENSG00000274925	CTD-2547G23.4	0.0413499	3.91197	0.432288
ENSG00000085449	WDFY1	0.0362262	6.59667	0.432359
ENSG00000132004	FBXW9	0.0984961	0.534863	0.432483
ENSG00000089775	ZBTB25	-0.0417309	6.22788	0.432905
ENSG00000135048	TMEM2	-0.03181	7.71205	0.432905
ENSG00000135077	HAVCR2	0.0508807	5.10363	0.432905
ENSG00000136573	BLK	-0.108914	4.19121	0.432905
ENSG00000231697	NANOGP5	-0.1022	1.25363	0.432921
ENSG00000123104	ITPR2	-0.0376357	8.09229	0.433005
ENSG00000181029	TRAPPC5	0.0536133	3.4142	0.433107
ENSG00000260121	RP5-1142A6.9	0.145176	-0.799851	0.433274
ENSG00000274627	RP11-104N10.2	-0.0738534	4.16098	0.433857
ENSG00000112159	MDN1	-0.0460017	7.35128	0.433911
ENSG00000116670	MAD2L2	0.0563935	3.48999	0.433911
ENSG00000166233	ARIH1	-0.0270747	7.0455	0.433911
ENSG00000174483	BBS1	-0.0860819	0.794299	0.433911
ENSG00000261208	RP11-452D12.1	0.112201	3.62139	0.433911
ENSG00000131634	TMEM204	-0.0814701	4.14258	0.434176
ENSG00000248863	RP11-83A24.1	-0.067643	1.90043	0.434177
ENSG00000004864	SLC25A13	-0.0398816	4.25339	0.434631
ENSG00000229989	MIR181A1HG	0.0653076	3.13814	0.434631
ENSG00000274961	RP3-492J12.2	-0.103404	1.06654	0.434631
ENSG00000160460	SPTBN4	-0.1865	-2.09802	0.435943
ENSG00000198700	IPO9	-0.0317623	6.11385	0.435943
ENSG00000064012	CASP8	0.0340336	8.28528	0.436338
ENSG00000144655	CSRNP1	-0.065973	5.17814	0.436338
ENSG00000271752	RP11-269M20.3	-0.168185	-1.38377	0.436338
ENSG00000169299	PGM2	0.0348026	6.32266	0.43791
ENSG00000213131	YWHAZP4	0.141234	-0.20485	0.43791
ENSG00000128253	RFPL2	-0.172301	-0.268424	0.438412
ENSG00000138073	PREB	0.0340163	4.4662	0.438412
ENSG00000212464	SNORA12	0.144029	4.77938	0.438469
ENSG00000272469	Metazoa_SRP	-0.155933	-0.268394	0.438687
ENSG00000105186	ANKRD27	0.0244717	5.70743	0.439015
ENSG00000152926	ZNF117	0.0848076	6.81493	0.439015
ENSG00000158769	F11R	-0.0538912	5.18298	0.439015
ENSG00000246225	RP11-17A1.3	-0.122376	0.187562	0.439015
ENSG00000166928	MS4A14	-0.0752047	4.35432	0.439629
ENSG00000269958	RP11-73M18.8	-0.069004	2.99564	0.439821
ENSG00000068024	HDAC4	0.0519846	6.54723	0.439919
ENSG00000198561	CTNND1	-0.0729995	4.53379	0.439919
ENSG00000215482	CALM2P3	0.177864	-1.45801	0.439919
ENSG00000140807	NKD1	-0.12861	0.633294	0.439993
ENSG00000231672	DIRC3	-0.103094	1.7833	0.439993
ENSG00000138101	DTNB	-0.0493339	3.77777	0.440168
ENSG00000280832	ST3GAL4-AS1	-0.0837114	3.38289	0.440774
ENSG00000236901	MIR600HG	-0.0887192	4.05853	0.441121
ENSG00000096968	JAK2	0.0407989	7.72011	0.441335
ENSG00000141480	ARRB2	0.0404559	7.96647	0.441335
ENSG00000172732	MUS81	0.0434785	4.53655	0.441335
ENSG00000174915	PTDSS2	0.0503934	2.69889	0.441335
ENSG00000211455	STK38L	0.0367337	6.62942	0.441335
ENSG00000224885	TSSC1-IT1	-0.132901	0.518314	0.441335
ENSG00000228434	AC004951.6	-0.111103	0.527379	0.441335
ENSG00000235863	B3GALT4	0.0484129	4.8593	0.441335
ENSG00000256723	RP11-167N4.4	-0.173129	-1.48315	0.441335
ENSG00000188010	MORN2	0.169093	-1.09763	0.441726
ENSG00000227543	SPAG5-AS1	0.102521	0.335478	0.441779
ENSG00000108510	MED13	-0.0220706	8.36969	0.442228
ENSG00000237945	LINC00649	-0.0795396	5.1635	0.443445
ENSG00000059573	ALDH18A1	-0.0388377	4.30939	0.443975
ENSG00000080031	PTPRH	0.183325	-2.32489	0.443975
ENSG00000241244	IGKV1D-16	0.220797	-2.05979	0.443975
ENSG00000243155	RP11-46A10.5	-0.150504	-0.388907	0.443975
ENSG00000266910	CTC-448F2.6	-0.104742	1.15959	0.443975
ENSG00000165410	CFL2	-0.0669164	2.71147	0.443996
ENSG00000185442	FAM174B	0.0673951	2.22666	0.443996
ENSG00000004399	PLXND1	0.073252	4.49232	0.444083
ENSG00000020577	SAMD4A	-0.0808187	3.01816	0.444083
ENSG00000101901	ALG13	-0.0547591	5.94354	0.444083
ENSG00000115306	SPTBN1	-0.0481434	7.77408	0.444083
ENSG00000144847	IGSF11	-0.207155	-1.42248	0.444083
ENSG00000159399	HK2	-0.0545061	6.38296	0.444083
ENSG00000166068	SPRED1	0.0749304	3.38839	0.444083
ENSG00000174446	SNAPC5	-0.0370656	3.78275	0.444083
ENSG00000179041	RRS1	-0.0558487	2.81724	0.444083
ENSG00000202058	RN7SKP80	0.119696	4.31225	0.444083
ENSG00000213462	ERV3-1	0.0614012	6.77079	0.444083
ENSG00000230666	CEACAM22P	0.29878	-2.11571	0.444083
ENSG00000247137	RP11-727A23.5	0.0427626	3.78492	0.444083
ENSG00000258878	CTD-2509G16.3	-0.189943	-2.40857	0.444083
ENSG00000267312	RP11-1094M14.7	0.107077	2.17089	0.444083
ENSG00000267472	LOC440461	0.164194	-2.33463	0.444083
ENSG00000273373	RP5-1074L1.4	-0.056316	3.98432	0.444083
ENSG00000275379	HIST1H3I	0.076837	3.65946	0.444083
ENSG00000280198	RP11-384M20.1	-0.117995	-0.0890112	0.444083
ENSG00000108950	FAM20A	0.182188	-0.0596561	0.444153
ENSG00000180071	ANKRD18A	-0.106067	1.86653	0.44464
ENSG00000225224	RP4-814D15.2	-0.0672258	2.38725	0.44464
ENSG00000108375	RNF43	-0.100282	0.862324	0.445024
ENSG00000117602	RCAN3	-0.0669292	6.46226	0.445024
ENSG00000120833	SOCS2	0.0673174	3.79553	0.445024
ENSG00000126870	WDR60	-0.0452881	3.88113	0.445024
ENSG00000136929	HEMGN	-0.150121	7.0154	0.445024
ENSG00000143303	RRNAD1	0.0440017	3.23142	0.445024
ENSG00000143811	PYCR2	0.0349525	4.81244	0.445024
ENSG00000145907	G3BP1	-0.0253999	7.62669	0.445024
ENSG00000147044	CASK	-0.0399808	5.56013	0.445024
ENSG00000164776	PHKG1	0.113071	0.0188933	0.445024
ENSG00000171262	FAM98B	-0.0503606	4.09117	0.445024
ENSG00000175792	RUVBL1	-0.0324513	4.5571	0.445024
ENSG00000184831	APOO	-0.0820673	1.40749	0.445024
ENSG00000197121	PGAP1	-0.0768023	3.66454	0.445024
ENSG00000211660	IGLV2-23	0.181949	1.34449	0.445024
ENSG00000225569	CCT4P2	-0.142176	0.23149	0.445024
ENSG00000253924	RP11-1023P17.2	-0.165144	0.573327	0.445024
ENSG00000073756	PTGS2	-0.0653455	5.37928	0.445078
ENSG00000119392	GLE1	0.0264463	5.92997	0.445078
ENSG00000128536	CDHR3	-0.0783201	3.34937	0.445078
ENSG00000273270	RP11-212P7.2	0.0529662	3.75962	0.445078
ENSG00000275063	AC233755.1	0.276069	-0.718563	0.445078
ENSG00000117640	MTFR1L	0.0258997	4.99156	0.44615
ENSG00000119866	BCL11A	-0.0848219	4.04805	0.44615
ENSG00000158683	PKD1L1	-0.115758	0.756452	0.44615
ENSG00000169914	OTUD3	-0.0376102	4.41903	0.44615
ENSG00000234076	TPRG1-AS1	0.155861	-0.373592	0.44615
ENSG00000247626	MARS2	-0.0388965	4.01162	0.44615
ENSG00000057019	DCBLD2	-0.106738	1.20403	0.446641
ENSG00000135378	PRRG4	0.0880844	4.78565	0.446641
ENSG00000142512	SIGLEC10	-0.0730935	6.44172	0.446641
ENSG00000175482	POLD4	0.0497859	3.88827	0.446641
ENSG00000180979	LRRC57	0.0284689	4.96571	0.446641
ENSG00000205485	AC004980.7	-0.0648447	2.74238	0.446641
ENSG00000215795	RP11-488L18.3	0.100899	0.759882	0.446641
ENSG00000258920	FOXN3-AS1	0.108883	0.0402159	0.446641
ENSG00000265879	MIR4748	0.16613	-2.32828	0.446641
ENSG00000280509	AL117341.1	-0.15191	-0.827113	0.446641
ENSG00000211943	IGHV3-15	0.16536	0.929889	0.447241
ENSG00000030066	NUP160	-0.0281748	6.25717	0.448013
ENSG00000159882	ZNF230	0.0492031	4.86959	0.448013
ENSG00000258875	CTD-2547L24.3	0.0579016	3.01296	0.448013
ENSG00000140451	PIF1	0.144639	-0.270328	0.4481
ENSG00000244116	IGKV2-28	0.198835	-1.37213	0.4481
ENSG00000254531	FLJ20021	0.110155	0.303851	0.448279
ENSG00000010017	RANBP9	-0.039797	5.68735	0.448678
ENSG00000279594	RP11-950C14.10	-0.0813599	1.22907	0.448678
ENSG00000135637	CCDC142	0.0397099	4.56678	0.449046
ENSG00000271924	5S_rRNA	0.171428	-1.68193	0.449046
ENSG00000135722	FBXL8	0.0711733	1.72593	0.449441
ENSG00000159958	TNFRSF13C	-0.128834	2.15283	0.449441
ENSG00000213707	HMGB1P10	-0.182309	-2.03067	0.449441
ENSG00000215196	AC091878.1	-0.131712	0.485273	0.449441
ENSG00000260412	RP11-438B23.2	0.206795	-1.6852	0.449441
ENSG00000277581	RP4-616B8.6	0.147422	-0.857811	0.449647
ENSG00000157680	DGKI	0.197807	-1.96242	0.449687
ENSG00000167695	FAM57A	0.159667	-1.06187	0.449892
ENSG00000197312	DDI2	-0.0296017	6.32486	0.449892
ENSG00000215039	CD27-AS1	0.0564827	2.59315	0.449892
ENSG00000222078	RN7SKP110	-0.111566	1.27258	0.449892
ENSG00000225544	KB-1027C11.4	0.179717	-1.74692	0.449892
ENSG00000267632	RP11-400F19.18	0.0895296	1.35421	0.449892
ENSG00000112137	PHACTR1	0.0827735	3.76365	0.450988
ENSG00000114107	CEP70	-0.0728621	2.7136	0.451521
ENSG00000119906	FAM178A	-0.0274519	6.41151	0.451521
ENSG00000141682	PMAIP1	0.0774628	3.19217	0.451521
ENSG00000143418	CERS2	0.0302846	6.88342	0.451521
ENSG00000144559	TAMM41	-0.0687339	3.6485	0.451521
ENSG00000172830	SSH3	0.0610181	3.43831	0.451521
ENSG00000201217	Y_RNA	-0.090352	1.71092	0.451521
ENSG00000203667	COX20	-0.042219	4.59768	0.451521
ENSG00000236773	RP11-365O16.1	0.133993	-2.66495	0.451521
ENSG00000258017	RP11-386G11.10	-0.118352	-0.322404	0.451521
ENSG00000269578	CTD-3222D19.5	-0.145043	-0.717193	0.451521
ENSG00000276524	RP11-323F24.3	0.175745	-1.89463	0.451521
ENSG00000047188	YTHDC2	-0.0373512	6.20759	0.451697
ENSG00000160213	CSTB	0.0516365	4.75023	0.451697
ENSG00000228923	AP000355.2	0.170507	-2.2916	0.451697
ENSG00000267185	PTP4A2P1	0.173852	-1.40689	0.451697
ENSG00000268659	RP11-310J24.3	-0.188526	-0.249069	0.451697
ENSG00000109854	HTATIP2	0.0375768	5.30172	0.451896
ENSG00000111879	FAM184A	-0.100708	1.97937	0.451896
ENSG00000121073	SLC35B1	0.0280381	4.49317	0.451896
ENSG00000130669	PAK4	-0.0845937	0.906909	0.451896
ENSG00000155366	RHOC	0.0682763	4.30991	0.451896
ENSG00000166579	NDEL1	-0.0400088	7.68662	0.451896
ENSG00000183960	KCNH8	-0.148987	1.98437	0.451896
ENSG00000188738	FSIP2	0.248085	-0.820144	0.451896
ENSG00000198855	FICD	0.041949	3.47627	0.451896
ENSG00000204438	GPANK1	0.0380172	4.44391	0.451896
ENSG00000211776	TRAV2	-0.118225	0.784166	0.451896
ENSG00000220267	ACTBP8	0.351499	-0.967917	0.451896
ENSG00000225217	HSPA7	0.110889	4.67747	0.451896
ENSG00000240429	LRRFIP1P1	0.0884179	1.46323	0.451896
ENSG00000254717	GLYATL1P2	0.180768	-2.36187	0.451896
ENSG00000258831	RP11-76E17.4	-0.154774	0.512195	0.451896
ENSG00000263535	AK4P1	0.158438	-1.7306	0.451896
ENSG00000272763	RP11-357H14.17	0.202201	-2.41217	0.451896
ENSG00000273141	RP11-820I16.4	0.122866	0.289541	0.451896
ENSG00000279948	CTD-2233K9.1	-0.082912	2.24147	0.451896
ENSG00000102245	CD40LG	-0.0674732	4.00177	0.45191
ENSG00000168214	RBPJ	-0.0353231	7.48245	0.45191
ENSG00000177674	AGTRAP	0.0441917	5.6018	0.45191
ENSG00000233719	GOT2P3	-0.202954	-1.84577	0.45191
ENSG00000143353	LYPLAL1	0.0529848	4.55429	0.45204
ENSG00000156990	RPUSD3	0.0358103	4.05913	0.45204
ENSG00000250461	RP11-631M6.2	-0.0911919	1.75936	0.45204
ENSG00000157404	KIT	0.0963438	1.9864	0.453113
ENSG00000183735	TBK1	0.0476384	5.64625	0.453113
ENSG00000198585	NUDT16	0.0374034	6.02839	0.454965
ENSG00000272183	RP11-523H20.3	0.191701	-1.81464	0.454965
ENSG00000164211	STARD4	0.062544	4.19306	0.455198
ENSG00000115661	STK16	0.0407519	4.65755	0.456062
ENSG00000065613	SLK	0.0397475	7.43738	0.456272
ENSG00000196167	COLCA1	-0.223698	-1.10729	0.456272
ENSG00000206784	Y_RNA	-0.157134	-1.14193	0.456272
ENSG00000251791	SCARNA6	0.130423	6.29562	0.456272
ENSG00000099985	OSM	-0.0905046	2.61702	0.45642
ENSG00000233087	AC073869.1	0.144669	-2.47068	0.456545
ENSG00000100554	ATP6V1D	0.0411312	5.32404	0.456616
ENSG00000113249	HAVCR1	-0.104542	0.955115	0.456616
ENSG00000113448	PDE4D	-0.0484139	5.90966	0.456616
ENSG00000123201	GUCY1B2	-0.290925	-2.19498	0.456616
ENSG00000154529	CNTNAP3B	0.267441	-1.55348	0.456616
ENSG00000155034	FBXL18	0.0756982	1.57567	0.456616
ENSG00000163378	EOGT	0.043804	3.44016	0.456616
ENSG00000164221	CCDC112	0.0677144	2.96154	0.456616
ENSG00000164305	CASP3	0.061255	5.26143	0.456616
ENSG00000172301	COPRS	0.0712142	1.86861	0.456616
ENSG00000200312	RN7SKP255	0.123032	3.79999	0.456616
ENSG00000207789	MIR26A2	-0.163041	-1.27234	0.456616
ENSG00000232184	RP11-370K11.1	-0.133058	0.434236	0.456616
ENSG00000245105	A2M-AS1	-0.11444	5.47043	0.456616
ENSG00000253981	ALG1L13P	-0.0854194	4.01933	0.456616
ENSG00000124104	SNX21	0.0586246	2.43896	0.457592
ENSG00000154370	TRIM11	0.0327803	5.32507	0.457592
ENSG00000080802	CNOT4	-0.0364307	5.39067	0.458302
ENSG00000157306	RP11-66N24.4	-0.0785965	1.15327	0.458302
ENSG00000231744	RP11-164H5.1	-0.176805	-2.36043	0.458302
ENSG00000104381	GDAP1	-0.0560168	3.1372	0.458649
ENSG00000135999	EPC2	-0.0246869	6.24569	0.458649
ENSG00000154001	PPP2R5E	-0.0375044	5.28735	0.458649
ENSG00000156265	MAP3K7CL	0.0923049	5.09736	0.458649
ENSG00000158435	CNOT11	-0.0240898	4.98569	0.458649
ENSG00000160208	RRP1B	-0.0363861	4.83593	0.458649
ENSG00000167528	ZNF641	0.0514175	7.18917	0.458649
ENSG00000167645	YIF1B	0.0614123	3.08828	0.458649
ENSG00000168329	CX3CR1	0.0682574	7.31761	0.458649
ENSG00000185905	C16orf54	0.0417408	7.43355	0.458649
ENSG00000186280	KDM4D	0.167067	-1.55037	0.458649
ENSG00000228956	SATB1-AS1	-0.0637605	5.07937	0.458649
ENSG00000229931	RP1-151F17.1	0.137317	-0.792368	0.458649
ENSG00000240137	ERICH6-AS1	-0.107118	0.520948	0.458649
ENSG00000248221	STX18-IT1	-0.147643	-0.310121	0.458649
ENSG00000259834	RP11-284N8.3	-0.055433	5.41976	0.458649
ENSG00000050555	LAMC3	0.195266	-1.74472	0.459387
ENSG00000074219	TEAD2	-0.197642	-2.41199	0.459387
ENSG00000083720	OXCT1	-0.0355963	5.1304	0.459387
ENSG00000109381	ELF2	-0.0233918	7.32846	0.459387
ENSG00000113360	DROSHA	-0.054547	4.91929	0.459387
ENSG00000113407	TARS	0.0374569	5.73505	0.459387
ENSG00000186354	C9orf47	0.079989	1.948	0.459387
ENSG00000245937	LINC01184	-0.0455997	4.22512	0.459387
ENSG00000256152	RP11-463O12.3	-0.162491	-1.48192	0.459387
ENSG00000275183	LENG9	0.0862499	1.21707	0.459387
ENSG00000279600	RP11-637C24.5	-0.10211	0.802056	0.459387
ENSG00000160803	UBQLN4	-0.0563428	2.65056	0.459526
ENSG00000132323	ILKAP	-0.0351357	4.39174	0.459828
ENSG00000143079	CTTNBP2NL	0.0630832	2.27961	0.460449
ENSG00000278861	RP11-338K17.6	-0.16477	-1.23722	0.460449
ENSG00000153944	MSI2	-0.0417061	6.21647	0.460875
ENSG00000240809	RP11-550F7.1	0.135077	0.276298	0.460875
ENSG00000170629	DPY19L2P2	-0.0582207	2.61252	0.461087
ENSG00000184060	ADAP2	0.0464889	3.69463	0.461087
ENSG00000189045	ANKDD1B	-0.10987	0.532443	0.461087
ENSG00000237039	AC018738.2	-0.151409	0.550833	0.461087
ENSG00000103064	SLC7A6	-0.0486439	6.52389	0.461348
ENSG00000125630	POLR1B	-0.0317434	5.12364	0.461348
ENSG00000135605	TEC	0.0477399	3.75382	0.461348
ENSG00000155367	PPM1J	-0.163635	-1.13061	0.461348
ENSG00000173171	MTX1	0.0464591	4.97786	0.461348
ENSG00000165810	BTNL9	-0.223734	-1.07009	0.462657
ENSG00000114982	KANSL3	-0.0470043	5.74425	0.463446
ENSG00000113328	CCNG1	0.0478731	6.20762	0.463836
ENSG00000120696	KBTBD7	0.0486749	5.63585	0.464377
ENSG00000196544	C17orf59	0.0507741	3.84278	0.465918
ENSG00000250371	RP11-22A3.2	0.173866	-2.03487	0.465918
ENSG00000276417	RP11-266K4.13	-0.152263	-0.673749	0.465918
ENSG00000116786	PLEKHM2	0.0421251	5.19212	0.465948
ENSG00000125304	TM9SF2	-0.0270879	7.10361	0.465948
ENSG00000133800	LYVE1	-0.107575	0.900928	0.465948
ENSG00000134802	SLC43A3	0.0438689	3.21949	0.465948
ENSG00000240875	LINC00886	-0.105899	1.09686	0.465948
ENSG00000247572	CKMT2-AS1	-0.0725598	2.32208	0.465948
ENSG00000259781	RP11-673C5.1	0.130395	1.52996	0.465948
ENSG00000272144	CTD-2035E11.5	-0.0664212	1.9003	0.465948
ENSG00000272155	RP11-707M3.3	-0.0675624	1.94953	0.465948
ENSG00000067208	EVI5	-0.049493	5.44129	0.46633
ENSG00000188092	GPR89B	-0.0480576	3.44225	0.46633
ENSG00000109320	NFKB1	-0.0307719	7.20442	0.466387
ENSG00000115504	EHBP1	-0.0331272	4.86482	0.466387
ENSG00000126351	THRA	0.0531279	3.45217	0.466387
ENSG00000164142	FAM160A1	-0.114646	0.956352	0.466387
ENSG00000175294	CATSPER1	0.0827008	1.35025	0.466387
ENSG00000187566	NHLRC1	0.142096	-0.86017	0.466387
ENSG00000198298	ZNF485	-0.0656751	2.2128	0.466387
ENSG00000211658	IGLV3-27	0.197501	-2.44491	0.466387
ENSG00000223547	ZNF844	0.0713379	5.21634	0.466387
ENSG00000258651	RP11-545M17.1	0.16809	-1.83694	0.466387
ENSG00000275278	RP11-946L16.2	0.160333	-0.988127	0.466387
ENSG00000144724	PTPRG	-0.187296	-0.552648	0.466416
ENSG00000173369	C1QB	-0.19545	0.0879044	0.466563
ENSG00000235001	EIF4A1P2	0.182085	-1.11526	0.466563
ENSG00000252908	RNU6-1003P	-0.137002	0.11996	0.466563
ENSG00000257950	P2RX5-TAX1BP3	-0.129982	0.208478	0.466563
ENSG00000279821	RP11-1334A24.5	0.0906772	1.33683	0.466563
ENSG00000145050	MANF	0.0504748	3.76993	0.467038
ENSG00000175063	UBE2C	0.106909	0.325035	0.467303
ENSG00000212232	SNORD17	0.149741	7.90235	0.467303
ENSG00000232545	KB-318B8.7	-0.086823	1.73995	0.467303
ENSG00000277767	RP11-365P13.5	-0.0938116	1.07823	0.467303
ENSG00000280008	RP11-652L8.4	-0.0510714	2.75319	0.467303
ENSG00000151240	DIP2C	-0.080459	3.13908	0.467435
ENSG00000160193	WDR4	-0.0586864	2.91799	0.467435
ENSG00000171928	TVP23B	0.0468504	4.2739	0.467435
ENSG00000238228	OR7E7P	-0.0857802	1.74234	0.467917
ENSG00000085563	ABCB1	-0.0690268	4.42399	0.46871
ENSG00000152229	PSTPIP2	0.0501995	5.78872	0.46871
ENSG00000205791	LOH12CR2	0.164437	-1.27701	0.46871
ENSG00000236104	ZBTB22	0.0396503	4.09298	0.46871
ENSG00000251748	RNU4ATAC11P	-0.189923	-1.60347	0.46871
ENSG00000128739	SNRPN	-0.038588	3.83704	0.468752
ENSG00000221946	FXYD7	-0.161545	-1.13379	0.468752
ENSG00000011422	PLAUR	-0.0564129	5.95518	0.469591
ENSG00000272465	RP1-136B1.1	-0.173585	-1.48258	0.469591
ENSG00000160588	MPZL3	-0.0441299	7.19235	0.470318
ENSG00000129484	PARP2	-0.05433	2.66715	0.471002
ENSG00000205740	RP11-363N22.3	0.0579323	2.31665	0.471002
ENSG00000279203	AC005785.5	-0.12805	-0.445172	0.47151
ENSG00000144182	LIPT1	-0.0709972	2.16547	0.471604
ENSG00000200488	RN7SKP203	0.119359	3.86643	0.471887
ENSG00000204120	GIGYF2	-0.024211	7.24808	0.472651
ENSG00000204311	DFNB59	-0.132506	-0.368633	0.472651
ENSG00000223787	RP4-593M8.1	-0.147927	-0.55567	0.472651
ENSG00000106077	ABHD11	0.0623394	2.07458	0.472799
ENSG00000200087	SNORA73B	0.136616	8.01677	0.472799
ENSG00000113494	PRLR	0.0844556	2.1092	0.472874
ENSG00000214226	C17orf67	-0.063693	2.0816	0.473074
ENSG00000160014	CALM3	0.0461391	6.11017	0.473428
ENSG00000239951	IGKV3-20	0.145481	3.52189	0.473428
ENSG00000280365	RP11-9H20.2	-0.153577	-0.0490732	0.474558
ENSG00000243051	RN7SL269P	-0.146314	-0.977257	0.474849
ENSG00000144746	ARL6IP5	0.0447764	7.65405	0.47525
ENSG00000206965	RNU6-5P	-0.0655345	2.71256	0.47525
ENSG00000263648	RP11-471L13.3	-0.0678051	1.73569	0.47525
ENSG00000219712	RP11-532F6.2	-0.0952922	1.68456	0.475606
ENSG00000137806	NDUFAF1	0.0433847	3.30206	0.475869
ENSG00000114054	PCCB	-0.0297783	4.16619	0.475905
ENSG00000168646	AXIN2	-0.0824791	2.71827	0.475905
ENSG00000213513	RP13-39P12.2	0.163863	-1.17854	0.475905
ENSG00000223387	RP11-408H1.3	0.212702	-1.49306	0.475905
ENSG00000251179	TMEM92-AS1	-0.14697	-0.146144	0.475905
ENSG00000267219	AC010504.2	0.169557	-2.01811	0.475905
ENSG00000234614	AL450992.2	-0.0876483	1.85152	0.475932
ENSG00000211784	TRAV10	-0.121952	0.465395	0.476463
ENSG00000108651	UTP6	0.0333269	5.84082	0.476686
ENSG00000267784	RP11-171I2.1	0.178605	-1.98384	0.476725
ENSG00000096696	DSP	-0.339761	0.626882	0.477161
ENSG00000107897	ACBD5	0.0327276	5.53238	0.478394
ENSG00000110777	POU2AF1	-0.112986	3.01391	0.478394
ENSG00000229191	RP11-168O16.1	0.113545	-0.0160131	0.478394
ENSG00000136286	MYO1G	0.0443383	7.97682	0.478646
ENSG00000204920	ZNF155	0.0770128	3.6222	0.478646
ENSG00000237161	RP11-32B5.1	-0.175128	-2.3196	0.478732
ENSG00000138311	ZNF365	-0.110716	2.32422	0.478859
ENSG00000211750	TRBV24-1	-0.146625	0.605037	0.479112
ENSG00000170579	DLGAP1	-0.19455	-1.51145	0.479135
ENSG00000261008	LINC01572	-0.0933889	1.38815	0.479135
ENSG00000131002	TXLNGY	-0.0506107	1.98387	0.4793
ENSG00000105612	DNASE2	0.0538429	5.02105	0.479485
ENSG00000279873	LINC01126	0.0509809	3.00221	0.479619
ENSG00000133136	GNG5P2	0.116366	-2.80151	0.480859
ENSG00000100304	TTLL12	0.0534589	3.58634	0.482499
ENSG00000234141	AC009473.1	0.162665	-1.60721	0.482499
ENSG00000174456	C12orf76	0.0385128	3.71464	0.483044
ENSG00000214654	RP11-27I1.4	0.0723276	1.78373	0.483044
ENSG00000240342	RPS2P5	-0.138994	6.3616	0.483044
ENSG00000270189	RP11-258C19.7	-0.0622738	3.07225	0.483044
ENSG00000258733	CTD-2341M24.1	-0.0648224	2.40127	0.483306
ENSG00000274750	HIST1H3E	0.09876	1.13229	0.483306
ENSG00000142444	C19orf52	0.0402088	3.66506	0.483358
ENSG00000161920	MED11	0.0419966	3.91195	0.483358
ENSG00000161956	SENP3	-0.0388559	3.07818	0.483358
ENSG00000170379	TCAF2	-0.0584091	2.84533	0.483358
ENSG00000170456	DENND5B	-0.093921	3.34858	0.483358
ENSG00000170633	RNF34	0.0167611	6.21395	0.483358
ENSG00000205683	DPF3	-0.101021	0.995974	0.483358
ENSG00000245468	RP11-367J11.3	0.146364	-0.839055	0.483358
ENSG00000254812	RP11-661A12.12	0.164943	-1.94964	0.483358
ENSG00000261408	TEN1-CDK3	0.129215	-0.803475	0.483358
ENSG00000276900	RP11-467L13.7	0.0660865	4.1092	0.483358
ENSG00000224610	RP11-265P11.1	-0.200988	-1.05958	0.483681
ENSG00000237491	RP11-206L10.9	-0.0788518	1.80876	0.483788
ENSG00000244405	ETV5	0.15664	-1.19093	0.484491
ENSG00000081019	RSBN1	-0.0278523	6.44	0.48471
ENSG00000095951	HIVEP1	-0.0312707	6.98121	0.48471
ENSG00000101935	AMMECR1	-0.0340037	4.63196	0.48471
ENSG00000108256	NUFIP2	-0.0279207	8.54934	0.48471
ENSG00000108587	GOSR1	-0.0310168	5.31273	0.48471
ENSG00000115257	PCSK4	0.152132	-1.82718	0.48471
ENSG00000116830	TTF2	-0.0513628	4.51635	0.48471
ENSG00000133056	PIK3C2B	-0.0711585	4.04976	0.48471
ENSG00000138814	PPP3CA	-0.0299963	6.65526	0.48471
ENSG00000143612	C1orf43	0.0321957	6.01669	0.48471
ENSG00000151468	CCDC3	-0.18246	-1.84318	0.48471
ENSG00000164070	HSPA4L	0.178717	-2.0482	0.48471
ENSG00000167123	CERCAM	0.154437	-0.42471	0.48471
ENSG00000168264	IRF2BP2	0.0241135	6.88019	0.48471
ENSG00000176476	CCDC101	-0.0468554	3.61533	0.48471
ENSG00000211970	IGHV4-61	0.191198	-2.42008	0.48471
ENSG00000233098	CCDC144NL-AS1	-0.19164	-2.02349	0.48471
ENSG00000248366	TRAJ51	-0.0953149	0.996188	0.48471
ENSG00000257086	RP11-783K16.13	0.160444	-2.12207	0.48471
ENSG00000263220	RP11-420A6.2	-0.153692	-1.5249	0.48471
ENSG00000276533	RP11-139H15.5	-0.0688501	2.59913	0.48471
ENSG00000280107	AL022393.9	0.172635	-1.73144	0.48471
ENSG00000125485	DDX31	-0.0378938	4.12058	0.485007
ENSG00000149798	CDC42EP2	-0.0705813	4.51817	0.485007
ENSG00000183010	PYCR1	0.173357	-1.53528	0.485007
ENSG00000241978	AKAP2	-0.12254	0.339665	0.485007
ENSG00000279996	CTB-139P11.2	-0.162739	0.0593954	0.486101
ENSG00000118922	KLF12	-0.0377867	7.48462	0.486818
ENSG00000123485	HJURP	0.135435	-0.0262131	0.486818
ENSG00000243701	LINC00883	-0.109219	0.375911	0.486818
ENSG00000275221	HIST1H2AK	0.0790502	2.30358	0.487039
ENSG00000026508	CD44	-0.040111	8.53466	0.487319
ENSG00000091490	SEL1L3	-0.0450197	6.76701	0.487319
ENSG00000119640	ACYP1	-0.0650204	2.10556	0.487319
ENSG00000136111	TBC1D4	-0.0617295	6.33115	0.487319
ENSG00000137713	PPP2R1B	-0.0321809	5.37586	0.487319
ENSG00000144120	TMEM177	-0.0571127	2.15696	0.487319
ENSG00000167306	MYO5B	-0.221803	-1.65373	0.487319
ENSG00000170425	ADORA2B	0.104105	0.386742	0.487319
ENSG00000179841	AKAP5	0.121247	2.15905	0.487319
ENSG00000187210	GCNT1	0.0432907	4.76243	0.487319
ENSG00000236670	KRT18P5	-0.0796866	1.32882	0.487319
ENSG00000240877	RN7SL521P	0.128938	-0.398056	0.487319
ENSG00000250696	RP11-704M14.1	0.120034	2.97274	0.487319
ENSG00000275120	RP11-182J1.17	0.16243	-2.22383	0.487319
ENSG00000276180	HIST1H4I	0.0788851	2.84041	0.487586
ENSG00000122085	MTERF4	-0.0390801	6.07534	0.487588
ENSG00000102554	KLF5	0.074578	2.10367	0.487676
ENSG00000151131	C12orf45	-0.0597686	2.0379	0.487676
ENSG00000211685	IGLC7	0.202194	-1.95589	0.487676
ENSG00000059588	TARBP1	-0.0386734	5.63022	0.488091
ENSG00000114030	KPNA1	-0.0257996	6.9172	0.488091
ENSG00000125122	LRRC29	0.0778402	1.06287	0.488091
ENSG00000130517	PGPEP1	0.0371556	4.6245	0.488091
ENSG00000158113	LRRC43	0.173532	-1.5499	0.488091
ENSG00000162378	ZYG11B	-0.0335262	6.42996	0.488091
ENSG00000170500	LONRF2	0.191885	-0.812456	0.488091
ENSG00000198851	CD3E	-0.0625679	4.51566	0.488091
ENSG00000206567	AC022007.5	0.152234	-1.24587	0.488091
ENSG00000278449	MIR6892	0.153179	-1.59083	0.488091
ENSG00000271646	RP11-326I11.3	0.048575	4.36239	0.488199
ENSG00000134744	ZCCHC11	-0.0381729	6.74045	0.488199
ENSG00000140743	CDR2	-0.0419831	4.92448	0.488199
ENSG00000143412	ANXA9	-0.158798	-1.42239	0.488199
ENSG00000150907	FOXO1	-0.0325976	6.65023	0.488199
ENSG00000158373	HIST1H2BD	0.0541542	5.63406	0.488199
ENSG00000164494	PDSS2	-0.0364286	3.18607	0.488199
ENSG00000211844	TRAJ45	-0.0759837	1.66878	0.488199
ENSG00000214711	CAPN14	-0.101869	0.49884	0.488199
ENSG00000248318	RP11-713M15.1	-0.166244	-1.5103	0.488199
ENSG00000253532	CTD-2340D6.1	0.124376	-0.422024	0.488199
ENSG00000110203	FOLR3	0.166108	4.37039	0.48866
ENSG00000110104	CCDC86	-0.0633477	1.87617	0.489053
ENSG00000111196	MAGOHB	-0.047466	3.5732	0.489053
ENSG00000138442	WDR12	-0.0369355	3.82492	0.489053
ENSG00000145703	IQGAP2	0.038271	8.26817	0.489053
ENSG00000163359	COL6A3	-0.100311	1.71954	0.489053
ENSG00000173372	C1QA	-0.147709	1.34089	0.489053
ENSG00000221838	AP4M1	0.0565083	2.15599	0.489053
ENSG00000224442	AC017035.2	-0.100815	2.38187	0.489053
ENSG00000235111	RP1-29C18.8	-0.124285	3.30115	0.489053
ENSG00000238141	BRWD1-AS1	0.164593	-2.0436	0.489053
ENSG00000249858	SNX5P1	0.129307	-2.5983	0.489053
ENSG00000250410	RP11-714G18.1	-0.169134	-1.45655	0.489053
ENSG00000272711	RP11-259N19.1	-0.114548	0.0962232	0.489053
ENSG00000281286	AC008865.1	-0.196238	-0.961568	0.489053
ENSG00000164056	SPRY1	-0.123556	0.640497	0.489439
ENSG00000177051	FBXO46	0.0498726	2.51023	0.489439
ENSG00000271781	CTD-2589H19.6	0.1567	-1.9391	0.489439
ENSG00000188599	NPIPP1	-0.10516	-0.117996	0.489626
ENSG00000231344	RP3-426I6.2	0.156929	-1.40024	0.489626
ENSG00000198821	CD247	0.051175	7.22902	0.490551
ENSG00000168395	ING5	-0.0360198	4.55904	0.490662
ENSG00000237757	EEF1A1P30	-0.0862749	1.59788	0.490662
ENSG00000279637	RP11-196B3.1	-0.0914855	1.24816	0.490662
ENSG00000262370	RP11-473M20.9	0.0751644	4.14263	0.490834
ENSG00000163125	RPRD2	-0.0388118	5.1927	0.490852
ENSG00000164929	BAALC	-0.181516	-1.53615	0.490852
ENSG00000172348	RCAN2	0.223464	-1.20359	0.490852
ENSG00000173614	NMNAT1	0.038814	4.06282	0.490852
ENSG00000175768	TOMM5	-0.0544196	2.47077	0.490852
ENSG00000196312	HIATL2	-0.0392337	3.42946	0.490852
ENSG00000206629	RNU1-63P	-0.171343	-1.84492	0.490852
ENSG00000207719	MIR623	-0.116542	0.46637	0.490852
ENSG00000238832	snoU109	0.158902	-2.28743	0.490852
ENSG00000252010	SCARNA5	0.157399	7.3448	0.490852
ENSG00000251034	RP11-582J16.4	-0.0900017	1.70941	0.491143
ENSG00000023516	AKAP11	-0.0362729	6.76284	0.491388
ENSG00000185022	MAFF	0.0660938	2.33742	0.491539
ENSG00000211791	TRAV13-2	-0.102237	1.59179	0.491873
ENSG00000235272	FAM103A2P	0.163171	-1.25585	0.491873
ENSG00000160752	FDPS	0.0290586	5.60568	0.492367
ENSG00000132185	FCRLA	-0.117143	4.08802	0.492373
ENSG00000112584	FAM120B	-0.0324127	6.66736	0.492639
ENSG00000230438	SERPINB9P1	-0.0739263	2.99751	0.492639
ENSG00000020426	MNAT1	-0.0453903	3.42801	0.492762
ENSG00000072609	CHFR	0.0279689	6.15007	0.492762
ENSG00000170190	SLC16A5	0.0515116	3.83511	0.492762
ENSG00000185291	IL3RA	0.129113	2.99226	0.492762
ENSG00000021776	AQR	-0.0239721	7.23511	0.493347
ENSG00000236871	LINC00106	-0.169971	-1.17475	0.493347
ENSG00000223916	RP11-353H3.1	-0.164049	-1.58995	0.493372
ENSG00000101146	RAE1	-0.0219854	5.05581	0.493645
ENSG00000110448	CD5	-0.0554469	5.26632	0.493645
ENSG00000162769	FLVCR1	-0.046218	4.62756	0.493645
ENSG00000272933	RP11-47A8.5	0.0949908	0.64636	0.493645
ENSG00000275377	MIR1299	-0.145455	-0.46631	0.493645
ENSG00000278126	RP11-454E5.4	-0.143309	-0.947269	0.493645
ENSG00000259144	RANBP20P	0.145389	-1.85421	0.494493
ENSG00000280077	RP11-87H9.4	-0.0575352	3.55719	0.495068
ENSG00000026103	FAS	0.0464179	6.53614	0.496629
ENSG00000111203	ITFG2	-0.0347863	5.20535	0.496629
ENSG00000132953	XPO4	-0.0295171	6.19681	0.496629
ENSG00000145014	TMEM44	0.107921	0.190107	0.496629
ENSG00000101407	TTI1	-0.0254666	5.28157	0.496809
ENSG00000115827	DCAF17	-0.033958	4.96542	0.496809
ENSG00000134330	IAH1	0.0324413	4.67583	0.496809
ENSG00000146858	ZC3HAV1L	0.102841	0.79544	0.496809
ENSG00000241764	AC002467.7	0.0734744	1.53696	0.496809
ENSG00000267676	THA1P	0.155662	-1.83742	0.496809
ENSG00000273444	RP5-1147A1.2	-0.131415	-0.603838	0.496809
ENSG00000105968	H2AFV	-0.0191331	6.40756	0.496995
ENSG00000075340	ADD2	-0.0814059	3.43695	0.498234
ENSG00000140450	ARRDC4	-0.0791255	4.57744	0.498234
ENSG00000218596	RP11-2J18.1	-0.0864894	2.07378	0.498234
ENSG00000173295	FAM86B3P	-0.0997022	0.804561	0.498324
ENSG00000026950	BTN3A1	0.0432216	8.21384	0.498704
ENSG00000093134	VNN3	-0.0679199	6.75819	0.498704
ENSG00000116874	WARS2	-0.0377983	3.42809	0.498704
ENSG00000160961	ZNF333	0.0369971	5.52098	0.498704
ENSG00000175161	CADM2	-0.242313	-2.1003	0.498704
ENSG00000196724	ZNF418	0.0840837	3.06882	0.498704
ENSG00000200354	SNORA71D	0.118934	1.95033	0.498704
ENSG00000227456	LINC00310	-0.117849	0.400861	0.498704
ENSG00000232022	FAAHP1	-0.132329	0.912893	0.498704
ENSG00000251661	RP11-326C3.11	0.0787996	2.68003	0.498704
ENSG00000260805	RP11-61J19.5	0.129244	-0.534225	0.498704
ENSG00000261635	RP11-618N24.1	-0.133355	-0.687155	0.498704
ENSG00000109762	SNX25	-0.0501053	4.11455	0.498786
ENSG00000112701	SENP6	-0.0355545	7.5084	0.498786
ENSG00000053524	MCF2L2	-0.0859148	3.01903	0.49923
ENSG00000139697	SBNO1	-0.0256081	7.12595	0.49971
ENSG00000259366	CTD-2647L4.4	-0.130826	1.0488	0.499801
ENSG00000173926	2021-03-03	-0.081733	2.87299	0.500053
ENSG00000214193	SH3D21	0.0758718	1.55318	0.500492
ENSG00000177337	DLGAP1-AS1	0.0469038	3.32739	0.500607
ENSG00000231793	DOC2GP	-0.141811	-0.548202	0.500607
ENSG00000122965	RBM19	-0.0337215	5.537	0.500636
ENSG00000050405	LIMA1	-0.0501138	3.88793	0.501977
ENSG00000185339	TCN2	0.0906068	1.93578	0.501977
ENSG00000075914	EXOSC7	-0.0310493	4.11755	0.502111
ENSG00000143553	SNAPIN	0.0365253	4.14512	0.502721
ENSG00000100722	ZC3H14	-0.024741	5.66998	0.503944
ENSG00000121774	KHDRBS1	-0.0227506	6.02055	0.503944
ENSG00000123297	TSFM	-0.0381739	3.23676	0.503944
ENSG00000132334	PTPRE	-0.0302256	8.38123	0.503944
ENSG00000135842	FAM129A	-0.0623404	9.75455	0.503944
ENSG00000143653	SCCPDH	0.059273	3.50375	0.503944
ENSG00000149485	FADS1	0.0671552	3.62887	0.503944
ENSG00000204683	C10orf113	-0.213776	-2.76437	0.503944
ENSG00000256073	URB1-AS1	0.128503	-0.227743	0.503944
ENSG00000226721	EEF1DP2	-0.086956	1.55788	0.504137
ENSG00000068383	INPP5A	0.0371479	5.11373	0.504164
ENSG00000243279	PRAF2	0.0748389	1.02677	0.504164
ENSG00000089177	KIF16B	-0.063962	4.57309	0.504388
ENSG00000105254	TBCB	0.0414591	5.00046	0.504388
ENSG00000135966	TGFBRAP1	-0.0309085	4.90067	0.504388
ENSG00000174989	FBXW8	-0.0596775	3.27313	0.504388
ENSG00000256223	ZNF10	-0.0521134	3.38679	0.504388
ENSG00000273265	RP11-353K11.1	0.0830274	0.802124	0.504652
ENSG00000075785	RAB7A	-0.0408392	5.88653	0.505005
ENSG00000151575	TEX9	-0.10771	1.21133	0.505005
ENSG00000196220	SRGAP3	-0.0686352	2.46833	0.505005
ENSG00000196391	ZNF774	0.151587	-1.2739	0.505005
ENSG00000240036	RP11-587D21.1	-0.162405	-1.76299	0.505005
ENSG00000261529	RP13-487P22.1	-0.0798497	1.36301	0.505005
ENSG00000267074	RP11-1094M14.5	-0.0732649	3.68213	0.505005
ENSG00000211749	TRBV23-1	-0.133563	0.31911	0.505143
ENSG00000107874	CUEDC2	0.0445663	3.84517	0.505178
ENSG00000113532	ST8SIA4	0.0328322	8.25127	0.505178
ENSG00000117399	CDC20	0.162358	-0.677494	0.505178
ENSG00000163600	ICOS	-0.0625466	4.4949	0.505178
ENSG00000189362	TMEM194B	-0.04633	4.50376	0.505178
ENSG00000233846	RP11-307L3.2	0.170467	-1.31278	0.505178
ENSG00000257818	RP11-1143G9.2	-0.0934021	0.953427	0.505178
[truncated: 19,638 more rows]

## Sheet: AD vs. ULE
Ensembl gene ID	HUGO gene symbol	Log fold change	Average expression	FDR
ENSG00000163629	PTPN13	0.232275	3.63096	0.00318369
ENSG00000076685	NT5C2	-0.071234	7.80251	0.0275119
ENSG00000143365	RORC	0.258793	1.95025	0.0815837
ENSG00000211892	IGHG4	-0.567726	-0.372707	0.0815837
ENSG00000110090	CPT1A	0.169691	5.90846	0.0946783
ENSG00000073737	DHRS9	-0.200387	5.25726	0.105887
ENSG00000211893	IGHG2	-0.415146	1.82904	0.105887
ENSG00000118308	LRMP	-0.0644622	7.74733	0.127613
ENSG00000139112	GABARAPL1	-0.0831577	6.36328	0.127613
ENSG00000144668	ITGA9	-0.253797	1.29264	0.127613
ENSG00000146122	DAAM2	-0.50487	1.58915	0.127613
ENSG00000148344	PTGES	-0.413157	-0.682054	0.127613
ENSG00000173825	TIGD3	-0.181974	3.0018	0.127613
ENSG00000196569	LAMA2	0.21588	1.65796	0.127613
ENSG00000117594	HSD11B1	0.373491	-2.02022	0.129699
ENSG00000118655	DCLRE1B	0.0881529	3.02182	0.129699
ENSG00000136156	ITM2B	-0.0804341	10.3339	0.129699
ENSG00000184588	PDE4B	-0.0716358	7.22682	0.129699
ENSG00000262370	RP11-473M20.9	-0.162344	4.14263	0.129699
ENSG00000008294	SPAG9	-0.0554822	8.17808	0.149383
ENSG00000109654	TRIM2	0.167976	2.86498	0.149383
ENSG00000144045	DQX1	-0.303827	-1.25883	0.149383
ENSG00000145868	FBXO38	-0.0478673	7.45488	0.149383
ENSG00000204713	TRIM27	-0.0556835	6.99953	0.149383
ENSG00000233387	RP11-342D11.3	0.183788	1.95404	0.149383
ENSG00000277586	NEFL	0.3004	1.88728	0.149383
ENSG00000173406	DAB1	0.246793	0.183824	0.164272
ENSG00000223509	RP11-632K20.7	0.142134	3.11029	0.164272
ENSG00000185278	ZBTB37	-0.0633958	8.0594	0.166794
ENSG00000076513	ANKRD13A	-0.0503056	8.41245	0.168704
ENSG00000006715	VPS41	-0.0492866	7.05318	0.178755
ENSG00000093134	VNN3	-0.133558	6.75819	0.187263
ENSG00000117859	OSBPL9	-0.043682	6.6536	0.187263
ENSG00000140287	HDC	-0.419593	3.03056	0.187263
ENSG00000164078	MST1R	0.310458	-1.97605	0.187263
ENSG00000227825	SLC9A7P1	0.123516	3.06438	0.187263
ENSG00000178935	ZNF552	-0.0692797	4.56715	0.199171
ENSG00000068784	SRBD1	-0.0668151	5.7482	0.213651
ENSG00000078747	ITCH	-0.0422789	7.84727	0.223555
ENSG00000109674	NEIL3	0.232909	3.69061	0.223555
ENSG00000118402	ELOVL4	0.241982	0.552272	0.223555
ENSG00000134508	CABLES1	-0.321842	-1.45911	0.223555
ENSG00000279693	RP11-71L14.3	0.234119	0.195344	0.223555
ENSG00000134830	C5AR2	-0.090141	7.04749	0.226586
ENSG00000158517	NCF1	-0.129955	6.83172	0.226586
ENSG00000184900	SUMO3	0.0615867	3.96097	0.226586
ENSG00000112486	CCR6	0.163764	1.48873	0.227943
ENSG00000277687	RP11-427L15.2	-0.126631	2.82131	0.227943
ENSG00000035664	DAPK2	-0.109071	6.19067	0.230288
ENSG00000135018	UBQLN1	0.0470136	7.53256	0.230288
ENSG00000139192	TAPBPL	-0.080597	5.45174	0.230288
ENSG00000151893	CACUL1	-0.0522576	7.56471	0.232637
ENSG00000125827	TMX4	-0.0611015	7.86575	0.243306
ENSG00000132670	PTPRA	0.0632902	6.30302	0.243306
ENSG00000168280	KIF5C	0.12026	3.59637	0.243306
ENSG00000115602	IL1RL1	-0.189218	3.73988	0.243313
ENSG00000149483	TMEM138	0.06562	4.60925	0.246524
ENSG00000051108	HERPUD1	-0.044526	6.67981	0.267133
ENSG00000172819	RARG	0.0922376	3.24523	0.270925
ENSG00000070501	POLB	-0.0778532	4.91576	0.278082
ENSG00000155962	CLIC2	0.179585	3.24711	0.278082
ENSG00000164125	FAM198B	0.101874	5.95186	0.278082
ENSG00000253981	ALG1L13P	-0.151572	4.01933	0.278082
ENSG00000264745	TTC39C-AS1	0.246332	0.0683305	0.278082
ENSG00000276317	RP11-93B14.10	-0.125263	1.74436	0.278082
ENSG00000110330	BIRC2	0.0853795	7.269	0.283174
ENSG00000165480	SKA3	0.209356	2.50453	0.283174
ENSG00000188906	LRRK2	-0.089395	10.6807	0.283174
ENSG00000214535	RPS15AP1	0.387493	-1.62119	0.283174
ENSG00000279174	RP11-1099M24.9	-0.296777	-2.25544	0.283174
ENSG00000105855	ITGB8	-0.364389	1.76124	0.291967
ENSG00000065615	CYB5R4	-0.0488822	7.57554	0.29848
ENSG00000150048	CLEC1A	0.164048	1.65253	0.29848
ENSG00000151657	KIN	-0.0521983	5.01839	0.29848
ENSG00000163788	SNRK	-0.0431748	8.40708	0.29848
ENSG00000004059	ARF5	-0.0659297	4.84475	0.301169
ENSG00000171606	ZNF274	-0.0537199	6.0133	0.302511
ENSG00000101596	SMCHD1	-0.0868804	10.8764	0.304003
ENSG00000010704	HFE	0.0899629	2.96983	0.304299
ENSG00000010803	SCMH1	0.0652291	4.09685	0.304299
ENSG00000012232	EXTL3	-0.0790227	6.44067	0.304299
ENSG00000075223	SEMA3C	-0.105219	4.04594	0.304299
ENSG00000083223	ZCCHC6	-0.0533801	8.93082	0.304299
ENSG00000100628	ASB2	-0.12762	1.9139	0.304299
ENSG00000114354	TFG	-0.0487678	5.7233	0.304299
ENSG00000131016	AKAP12	-0.348589	3.05701	0.304299
ENSG00000131242	RAB11FIP4	-0.0682318	7.06121	0.304299
ENSG00000135480	KRT7	0.295976	-2.38235	0.304299
ENSG00000137094	DNAJB5	-0.182926	1.42218	0.304299
ENSG00000153395	LPCAT1	-0.0654442	6.79819	0.304299
ENSG00000163354	DCST2	-0.272884	-1.99482	0.304299
ENSG00000163393	SLC22A15	-0.0842222	6.09611	0.304299
ENSG00000169871	TRIM56	-0.0558752	7.33534	0.304299
ENSG00000172794	RAB37	-0.0723787	6.58613	0.304299
ENSG00000177374	HIC1	-0.159569	1.39175	0.304299
ENSG00000179348	GATA2	-0.321766	2.6532	0.304299
ENSG00000186141	POLR3C	0.044514	4.82921	0.304299
ENSG00000201544	SNORA16B	-0.174237	0.324632	0.304299
ENSG00000211640	IGLV6-57	-0.29025	0.164232	0.304299
ENSG00000211677	IGLC2	-0.255176	3.38956	0.304299
ENSG00000211897	IGHG3	-0.301479	0.339217	0.304299
ENSG00000234076	TPRG1-AS1	0.264798	-0.373592	0.304299
ENSG00000280351	CTD-2561B21.8	0.190829	-0.176236	0.31499
ENSG00000169621	APLF	0.10382	3.45992	0.317295
ENSG00000102245	CD40LG	0.103793	4.00177	0.321157
ENSG00000111012	CYP27B1	0.273575	-2.14947	0.321157
ENSG00000135525	MAP7	-0.158633	2.248	0.321157
ENSG00000186184	POLR1D	0.104233	6.12857	0.321157
ENSG00000113719	ERGIC1	-0.0721661	7.75395	0.325591
ENSG00000123094	RASSF8	-0.271984	-1.2385	0.325591
ENSG00000138738	PRDM5	-0.181664	3.82172	0.325591
ENSG00000162104	ADCY9	0.101186	3.7527	0.325591
ENSG00000163701	IL17RE	0.291069	-1.21505	0.325591
ENSG00000177426	TGIF1	-0.0628812	4.67371	0.325591
ENSG00000186827	TNFRSF4	0.171935	0.91584	0.325591
ENSG00000198408	MGEA5	-0.0542821	9.14718	0.325591
ENSG00000205155	PSENEN	-0.0855209	3.76123	0.325591
ENSG00000268357	VN1R81P	-0.201069	-0.267795	0.325591
ENSG00000272910	RP11-15L13.4	-0.238564	-0.968522	0.325591
ENSG00000250305	KIAA1456	0.29907	-1.48054	0.331649
ENSG00000152484	USP12	0.158674	6.59249	0.3326
ENSG00000218809	RP1-229K20.5	-0.12007	2.96374	0.3326
ENSG00000225579	EDNRB-AS1	0.278922	-1.88966	0.3326
ENSG00000245552	RP11-712B9.2	0.119447	2.73445	0.3326
ENSG00000126106	TMEM53	-0.135713	0.751197	0.335475
ENSG00000135604	STX11	-0.0908912	6.13322	0.335475
ENSG00000136867	SLC31A2	-0.0859596	6.90097	0.335475
ENSG00000166801	FAM111A	-0.0527266	7.06696	0.335475
ENSG00000186166	CCDC84	-0.0564017	4.98387	0.335475
ENSG00000010030	ETV7	-0.325129	2.07694	0.336213
ENSG00000128335	APOL2	-0.0785639	6.88248	0.336213
ENSG00000173480	ZNF417	-0.0534135	5.49638	0.336213
ENSG00000178498	DTX3	0.122539	1.48478	0.336213
ENSG00000198838	RYR3	-0.307125	0.0148325	0.336213
ENSG00000211651	IGLV1-44	-0.287314	0.385289	0.346535
ENSG00000110446	SLC15A3	-0.0665996	5.82367	0.354501
ENSG00000141127	PRPSAP2	0.0516886	5.1274	0.354501
ENSG00000154359	LONRF1	-0.0638966	4.885	0.354501
ENSG00000171055	FEZ2	-0.0484905	5.94847	0.354501
ENSG00000276523	RP11-490B18.6	-0.245465	-1.31091	0.354501
ENSG00000063438	AHRR	-0.262816	-0.246724	0.363368
ENSG00000113758	DBN1	-0.12741	2.51569	0.363368
ENSG00000163751	CPA3	-0.324066	2.53428	0.363368
ENSG00000257809	RP11-603J24.14	-0.235787	-0.977094	0.363368
ENSG00000117335	CD46	-0.0537422	9.19464	0.372997
ENSG00000164162	ANAPC10	0.083069	3.0865	0.372997
ENSG00000183019	MCEMP1	0.167596	1.80016	0.372997
ENSG00000244716	RP11-20O24.4	0.364803	-1.52222	0.373294
ENSG00000078142	PIK3C3	-0.0405055	7.10691	0.374615
ENSG00000085449	WDFY1	-0.0531421	6.59667	0.374615
ENSG00000104549	SQLE	0.0966976	3.20544	0.374615
ENSG00000104763	ASAH1	-0.0618948	8.40639	0.374615
ENSG00000107290	SETX	-0.0537539	9.73755	0.374615
ENSG00000113520	IL4	-0.317324	-1.72173	0.374615
ENSG00000114316	USP4	-0.0408101	7.6327	0.374615
ENSG00000119820	YIPF4	-0.044008	7.1323	0.374615
ENSG00000122557	HERPUD2	-0.0364058	6.30136	0.374615
ENSG00000123096	SSPN	-0.168163	1.3483	0.374615
ENSG00000123810	B9D2	-0.0863108	3.097	0.374615
ENSG00000124243	BCAS4	-0.0840587	3.74928	0.374615
ENSG00000125347	IRF1	-0.0687076	9.42295	0.374615
ENSG00000128973	CLN6	-0.0962646	3.68894	0.374615
ENSG00000139597	N4BP2L1	-0.0477113	5.47467	0.374615
ENSG00000144228	SPOPL	-0.0587718	7.46589	0.374615
ENSG00000154114	TBCEL	0.121578	6.00837	0.374615
ENSG00000155659	VSIG4	-0.217375	1.31547	0.374615
ENSG00000161526	SAP30BP	-0.037523	6.03968	0.374615
ENSG00000166439	RNF169	-0.0352685	7.87669	0.374615
ENSG00000170180	GYPA	0.22058	3.32731	0.374615
ENSG00000182885	GPR97	-0.124246	6.12073	0.374615
ENSG00000197555	SIPA1L1	-0.0807502	7.58904	0.374615
ENSG00000206344	HCG27	-0.0751724	7.37638	0.374615
ENSG00000211662	IGLV3-21	-0.285654	1.42349	0.374615
ENSG00000220842	RP11-572P18.1	0.347168	-0.555589	0.374615
ENSG00000223336	RNU2-6P	-0.168507	0.499143	0.374615
ENSG00000228278	ORM2	-0.323108	-1.93708	0.374615
ENSG00000233901	LINC01503	0.145896	0.985209	0.374615
ENSG00000235271	RP1-90L6.3	0.248139	-0.97517	0.374615
ENSG00000241975	TCEB1P19	-0.0887453	2.79821	0.374615
ENSG00000244607	CCDC13	-0.139991	1.2553	0.374615
ENSG00000247679	RP11-1277A3.1	0.126992	0.816856	0.374615
ENSG00000260671	RP11-278A23.2	0.277808	0.261574	0.374615
ENSG00000265992	ESRG	0.365718	-2.26329	0.374615
ENSG00000005108	THSD7A	-0.338257	0.0791047	0.37602
ENSG00000006652	IFRD1	-0.0623032	7.2344	0.37602
ENSG00000011198	ABHD5	-0.0790472	6.91051	0.37602
ENSG00000064419	TNPO3	-0.0346645	6.85538	0.37602
ENSG00000089041	P2RX7	0.0780739	4.71315	0.37602
ENSG00000100380	ST13	0.0943695	6.40444	0.37602
ENSG00000100644	HIF1A	-0.0612646	7.73844	0.37602
ENSG00000101343	CRNKL1	-0.0433865	6.45731	0.37602
ENSG00000105072	C19orf44	0.117794	0.920712	0.37602
ENSG00000124334	IL9R	-0.211723	-0.255926	0.37602
ENSG00000132357	CARD6	0.0655089	4.49296	0.37602
ENSG00000134444	KIAA1468	-0.0451568	7.55285	0.37602
ENSG00000135299	ANKRD6	-0.0715963	3.33054	0.37602
ENSG00000139323	POC1B	0.0792992	5.26985	0.37602
ENSG00000141076	CIRH1A	0.0550808	3.63873	0.37602
ENSG00000143164	DCAF6	0.0883873	6.07884	0.37602
ENSG00000149212	SESN3	0.103246	8.30836	0.37602
ENSG00000153406	NMRAL1	-0.0797111	4.03275	0.37602
ENSG00000160588	MPZL3	-0.0674845	7.19235	0.37602
ENSG00000170558	CDH2	-0.27012	0.720344	0.37602
ENSG00000171714	ANO5	0.18701	1.21158	0.37602
ENSG00000176142	TMEM39A	-0.0384537	5.09744	0.37602
ENSG00000197872	FAM49A	-0.0493113	7.48233	0.37602
ENSG00000214626	POLR3DP1	0.214537	-0.249453	0.37602
ENSG00000214717	ZBED1	-0.0616625	5.80366	0.37602
ENSG00000236296	GUSBP5	0.222033	0.499847	0.37602
ENSG00000246363	RP11-13A1.1	-0.285089	0.88368	0.37602
ENSG00000262636	CTD-3088G3.4	0.238836	-0.588724	0.37602
ENSG00000263266	RPS7P1	0.408408	-0.472789	0.37602
ENSG00000263465	SRSF8	0.0646589	5.86657	0.37602
ENSG00000267895	SIGLEC19P	0.181259	-0.0117403	0.37602
ENSG00000271554	RP4-665N4.8	-0.26898	-1.76707	0.37602
ENSG00000276757	Metazoa_SRP	0.250057	-1.93571	0.37602
ENSG00000279605	RP11-661A12.8	-0.214855	-0.993983	0.37602
ENSG00000256020	RP5-1154L15.2	0.336168	0.285774	0.381691
ENSG00000163528	CHCHD4	0.0719694	2.79135	0.386234
ENSG00000198400	NTRK1	-0.289705	-1.16686	0.386983
ENSG00000229453	SPINK8	-0.26422	-1.81771	0.387125
ENSG00000116983	HPCAL4	0.161345	2.60144	0.38895
ENSG00000125257	ABCC4	0.126837	5.70965	0.38895
ENSG00000258819	RP11-7F17.3	-0.183589	4.02125	0.38895
ENSG00000115415	STAT1	-0.107427	9.27663	0.391831
ENSG00000116138	DNAJC16	0.0390606	5.04665	0.391831
ENSG00000150977	RILPL2	-0.0530493	6.12004	0.391831
ENSG00000112210	RAB23	0.157569	0.855774	0.393091
ENSG00000124356	STAMBP	-0.0352326	5.64437	0.393091
ENSG00000196562	SULF2	-0.0844492	7.43171	0.393091
ENSG00000196684	HSH2D	-0.0868877	6.27729	0.393091
ENSG00000207820	MIR545	-0.236921	-1.59058	0.393091
ENSG00000038219	BOD1L1	-0.049533	9.27647	0.398943
ENSG00000146540	C7orf50	-0.0929839	3.36901	0.398943
ENSG00000250361	GYPB	0.23439	4.19397	0.398943
ENSG00000269028	MTRNR2L12	0.293804	-1.50585	0.398943
ENSG00000178904	DPY19L3	-0.0641799	5.42306	0.399337
ENSG00000067225	PKM	0.0679173	6.65981	0.399574
ENSG00000157514	TSC22D3	-0.0803679	8.36105	0.401747
ENSG00000106771	TMEM245	0.0541461	6.21982	0.407236
ENSG00000210082	MT-RNR2	0.162962	10.2668	0.407236
ENSG00000234745	HLA-B	-0.0776871	11.4961	0.407236
ENSG00000256229	ZNF486	-0.0870746	4.63285	0.407236
ENSG00000104325	DECR1	-0.043655	6.78283	0.407245
ENSG00000023318	ERP44	-0.0444165	6.24705	0.408113
ENSG00000116701	NCF2	-0.0542291	9.99141	0.408113
ENSG00000143815	LBR	-0.049566	8.39959	0.408113
ENSG00000164938	TP53INP1	-0.0547475	7.69916	0.408113
ENSG00000166523	CLEC4E	-0.101551	6.30041	0.408113
ENSG00000167863	ATP5H	0.0594966	4.95457	0.408113
ENSG00000172671	ZFAND4	0.0715066	5.10607	0.408113
ENSG00000204592	HLA-E	-0.0649121	11.4346	0.408113
ENSG00000229314	ORM1	-0.285034	1.6705	0.414103
ENSG00000224177	LINC00570	0.223529	2.13603	0.417149
ENSG00000033050	ABCF2	0.045855	4.39493	0.417222
ENSG00000115604	IL18R1	-0.0957204	5.60212	0.418088
ENSG00000249697	RP11-155L15.1	0.277331	-2.50625	0.418088
ENSG00000182022	CHST15	-0.0703183	8.62969	0.418348
ENSG00000077264	PAK3	0.21303	-0.45012	0.419249
ENSG00000081913	PHLPP1	-0.0796339	4.22567	0.419249
ENSG00000102010	BMX	-0.141536	3.11423	0.419249
ENSG00000102554	KLF5	-0.115029	2.10367	0.419249
ENSG00000104765	BNIP3L	0.138237	10.1873	0.419249
ENSG00000105352	CEACAM4	-0.111414	5.34523	0.419249
ENSG00000107485	GATA3	0.0936672	2.3774	0.419249
ENSG00000111726	CMAS	0.0896181	4.03937	0.419249
ENSG00000114346	ECT2	0.0902316	3.44582	0.419249
ENSG00000115993	TRAK2	0.122003	7.89361	0.419249
ENSG00000119541	VPS4B	-0.0386846	7.1014	0.419249
ENSG00000119707	RBM25	-0.0472219	8.00823	0.419249
ENSG00000124406	ATP8A1	-0.0596368	7.6492	0.419249
ENSG00000124429	POF1B	0.233912	-0.285531	0.419249
ENSG00000124731	TREM1	-0.0913885	7.61747	0.419249
ENSG00000132155	RAF1	-0.0422694	8.32597	0.419249
ENSG00000137414	FAM8A1	-0.072638	7.35425	0.419249
ENSG00000143546	S100A8	0.185148	8.31711	0.419249
ENSG00000146063	TRIM41	-0.0424644	4.88683	0.419249
ENSG00000153339	TRAPPC8	-0.0358434	7.50135	0.419249
ENSG00000162627	SNX7	-0.307027	-2.11263	0.419249
ENSG00000163348	PYGO2	0.0501906	4.33355	0.419249
ENSG00000164674	SYTL3	-0.0743228	5.75819	0.419249
ENSG00000166819	PLIN1	-0.241638	-1.94662	0.419249
ENSG00000170476	MZB1	-0.19103	2.03021	0.419249
ENSG00000172824	CES4A	0.0960962	2.0268	0.419249
ENSG00000175104	TRAF6	-0.0310308	5.99834	0.419249
ENSG00000183111	ARHGEF37	0.218448	1.85924	0.419249
ENSG00000183323	CCDC125	-0.0702756	5.46939	0.419249
ENSG00000185946	RNPC3	-0.0479943	6.15125	0.419249
ENSG00000197323	TRIM33	-0.0361256	7.50309	0.419249
ENSG00000206199	ANKUB1	-0.161632	1.79162	0.419249
ENSG00000211638	IGLV8-61	-0.314529	-0.1066	0.419249
ENSG00000212664	RP11-592N21.1	0.282743	-2.26682	0.419249
ENSG00000236209	AC104135.2	0.376715	-1.67065	0.419249
ENSG00000251456	RP11-436H11.5	-0.261805	-2.22468	0.419249
ENSG00000280303	ERICD	-0.241441	-2.02029	0.419249
ENSG00000281003	Metazoa_SRP	0.246712	-2.33844	0.419249
ENSG00000125686	MED1	0.03195	6.27091	0.420302
ENSG00000232098	CTD-2619J13.14	0.104633	1.21564	0.421293
ENSG00000125814	NAPB	-0.0559854	4.8174	0.421528
ENSG00000152078	TMEM56	0.191305	3.05807	0.421528
ENSG00000163171	CDC42EP3	0.0602395	7.55903	0.421528
ENSG00000169224	GCSAML	-0.232797	1.55384	0.421528
ENSG00000217416	ISCA1P1	0.318811	-1.38907	0.421528
ENSG00000233038	AC011899.9	-0.125377	3.39376	0.421528
ENSG00000249993	BFSP2-AS1	-0.238045	-1.25024	0.421528
ENSG00000274678	RP11-2C24.7	-0.238619	-2.14549	0.421528
ENSG00000197057	DTHD1	-0.142794	4.70261	0.424449
ENSG00000135898	GPR55	-0.131642	2.7659	0.427277
ENSG00000136802	LRRC8A	0.0942894	4.87566	0.427277
ENSG00000205784	ARRDC5	-0.0818335	2.81017	0.427277
ENSG00000215861	WI2-1896O14.1	-0.257284	-1.78416	0.427277
ENSG00000036257	CUL3	-0.0380911	7.15248	0.432386
ENSG00000064012	CASP8	-0.0456917	8.28528	0.432386
ENSG00000069974	RAB27A	-0.0481369	6.91672	0.432386
ENSG00000116668	SWT1	0.102229	5.01457	0.432386
ENSG00000116675	DNAJC6	0.171413	4.29476	0.432386
ENSG00000118965	WDR35	-0.0592713	4.22287	0.432386
ENSG00000123342	MMP19	0.249727	-2.06157	0.432386
ENSG00000134247	PTGFRN	0.151653	0.846533	0.432386
ENSG00000136932	C9orf156	-0.0395862	5.69324	0.432386
ENSG00000138764	CCNG2	-0.0539905	6.49295	0.432386
ENSG00000152242	C18orf25	-0.0397375	6.83687	0.432386
ENSG00000163041	H3F3A	-0.0516785	7.49817	0.432386
ENSG00000173812	EIF1	0.0588673	6.77622	0.432386
ENSG00000175582	RAB6A	0.0619837	6.80169	0.432386
ENSG00000183576	SETD3	0.0516627	6.05847	0.432386
ENSG00000189180	ZNF33A	-0.0456763	7.67775	0.432386
ENSG00000196872	KIAA1211L	-0.144143	1.07558	0.432386
ENSG00000197965	MPZL1	-0.114742	6.5892	0.432386
ENSG00000211890	IGHA2	-0.27865	2	0.432386
ENSG00000232346	SC22CB-1E7.1	0.318589	-1.62836	0.432386
ENSG00000239840	RPL23AP72	0.223794	-1.32304	0.432386
ENSG00000240065	PSMB9	-0.0725575	7.09571	0.432386
ENSG00000253653	CTC-248O19.1	0.230385	-1.38337	0.432386
ENSG00000256361	RP11-613F22.6	-0.115265	0.992989	0.432386
ENSG00000271452	RP11-342K6.2	0.22644	-1.4459	0.432386
ENSG00000276368	HIST1H2AJ	-0.183386	1.37074	0.432386
ENSG00000280206	CTB-193M12.5	-0.0707677	3.45912	0.432386
ENSG00000057704	TMCC3	-0.0766581	6.84438	0.432681
ENSG00000101460	MAP1LC3A	-0.152677	1.1547	0.432681
ENSG00000163818	LZTFL1	-0.0680103	3.81436	0.432681
ENSG00000165178	NCF1C	-0.114141	5.20341	0.432681
ENSG00000184557	SOCS3	0.122774	5.54027	0.432681
ENSG00000236030	LINC01036	0.248673	-0.253161	0.432681
ENSG00000236320	SLFN14	0.1936	3.14198	0.432681
ENSG00000270240	AC015849.2	-0.246497	-1.97681	0.432681
ENSG00000125871	MGME1	-0.055565	4.65224	0.434521
ENSG00000165879	FRAT1	-0.067988	6.32708	0.434521
ENSG00000254500	RANP3	-0.185465	-0.456288	0.434521
ENSG00000101255	TRIB3	-0.101729	2.19514	0.43643
ENSG00000163827	LRRC2	0.261564	-0.423289	0.43643
ENSG00000165434	PGM2L1	0.0837325	4.62979	0.43643
ENSG00000112655	PTK7	-0.155609	0.87034	0.437171
ENSG00000132965	ALOX5AP	-0.0836992	7.40096	0.437171
ENSG00000143119	CD53	-0.0285741	9.14246	0.437171
ENSG00000211660	IGLV2-23	-0.226377	1.34449	0.437171
ENSG00000267212	CTD-2659N19.9	-0.158954	0.00420981	0.437171
ENSG00000035687	ADSS	-0.044217	6.16532	0.439052
ENSG00000103051	COG4	-0.0380045	5.88686	0.439052
ENSG00000123240	OPTN	0.111531	7.11429	0.439052
ENSG00000131459	GFPT2	-0.303924	-1.4395	0.439052
ENSG00000135218	CD36	0.082102	7.57545	0.439052
ENSG00000137804	NUSAP1	0.139155	3.63503	0.439052
ENSG00000176853	FAM91A1	-0.0381157	7.15459	0.439052
ENSG00000180875	GREM2	0.249106	-0.56713	0.439052
ENSG00000187862	TTC24	-0.153156	0.742919	0.439052
ENSG00000226084	RP4-706A16.3	0.3614	-0.594295	0.439052
ENSG00000040199	PHLPP2	0.0919515	5.30552	0.440425
ENSG00000212719	C17orf51	0.101992	2.10777	0.44187
ENSG00000127952	STYXL1	-0.0671379	3.9455	0.442407
ENSG00000134686	PHC2	-0.0893202	6.94768	0.442407
ENSG00000157388	CACNA1D	-0.124433	1.86966	0.442407
ENSG00000170006	TMEM154	-0.0596069	9.60702	0.442407
ENSG00000205763	RP9P	0.148438	0.207835	0.442407
ENSG00000224533	TMLHE-AS1	0.21958	-1.16938	0.442407
ENSG00000224650	IGHV3-74	-0.224199	0.12409	0.442407
ENSG00000244357	RN7SL145P	-0.143503	0.239952	0.442407
ENSG00000246263	KB-431C1.4	-0.0734876	4.73838	0.442407
ENSG00000007516	BAIAP3	-0.170548	2.53274	0.443288
ENSG00000100749	VRK1	0.112632	4.93457	0.443288
ENSG00000105856	HBP1	-0.0417048	7.84295	0.443288
ENSG00000115339	GALNT3	-0.0634685	5.31917	0.443288
ENSG00000143384	MCL1	-0.0526176	10.8665	0.443288
ENSG00000151136	BTBD11	-0.0907161	4.13389	0.443288
ENSG00000162645	GBP2	-0.0721401	8.88998	0.443288
ENSG00000169439	SDC2	-0.21925	0.9926	0.443288
ENSG00000171224	C10orf35	0.186803	-0.520399	0.443288
ENSG00000185291	IL3RA	-0.186848	2.99226	0.443288
ENSG00000186081	KRT5	-0.287257	-1.37064	0.443288
ENSG00000211659	IGLV3-25	-0.235851	1.192	0.443288
ENSG00000226686	LINC01535	-0.250227	-1.932	0.443288
ENSG00000234797	RPS3AP6	0.363684	1.19858	0.443288
ENSG00000252759	Y_RNA	-0.079847	1.90048	0.443288
ENSG00000253755	IGHGP	-0.262668	-2.55295	0.443288
ENSG00000260190	RP11-229P13.25	-0.197125	-1.02182	0.443288
ENSG00000108578	BLMH	0.046237	4.56986	0.443909
ENSG00000088808	PPP1R13B	0.0776397	2.75597	0.444016
ENSG00000092200	RPGRIP1	-0.109861	3.42489	0.444016
ENSG00000154957	ZNF18	-0.0407632	4.97163	0.444016
ENSG00000262714	RP11-44F14.8	-0.156403	2.99688	0.444016
ENSG00000110911	SLC11A2	0.0438719	5.43445	0.444848
ENSG00000180979	LRRC57	-0.0381058	4.96571	0.447797
ENSG00000012660	ELOVL5	-0.0360441	8.05947	0.448464
ENSG00000101224	CDC25B	0.0753442	5.21551	0.448464
ENSG00000130304	SLC27A1	0.107732	1.45593	0.448464
ENSG00000163374	YY1AP1	0.0666338	6.01085	0.448464
ENSG00000163870	TPRA1	-0.0624982	3.88871	0.448464
ENSG00000164265	SCGB3A2	-0.283598	-2.0945	0.448464
ENSG00000189350	FAM179A	-0.115347	2.77508	0.448464
ENSG00000197299	BLM	-0.060756	3.79104	0.448464
ENSG00000227036	LINC00511	0.245878	-1.06839	0.448464
ENSG00000241657	TRBV11-2	0.161605	0.867479	0.448464
ENSG00000269688	AC008982.2	-0.0824743	1.89012	0.448464
ENSG00000273473	LL09NC01-139C3.1	-0.221705	-1.3549	0.448464
ENSG00000054654	SYNE2	-0.0670838	10.0346	0.45036
ENSG00000107957	SH3PXD2A	0.105467	3.29278	0.45036
ENSG00000135776	ABCB10	0.0818676	5.60221	0.45036
ENSG00000154856	APCDD1	0.211966	-0.306119	0.45036
ENSG00000235989	MORC2-AS1	-0.185668	0.112124	0.45036
ENSG00000253616	RP11-875O11.3	-0.113756	2.77176	0.45036
ENSG00000077514	POLD3	-0.046204	5.03575	0.450515
ENSG00000140807	NKD1	0.1592	0.633294	0.450515
ENSG00000250802	ZBED3-AS1	0.141404	0.278028	0.450515
ENSG00000130227	XPO7	0.0930742	7.32309	0.452606
ENSG00000160179	ABCG1	-0.129328	5.34946	0.452606
ENSG00000166845	C18orf54	0.0843843	2.56171	0.452606
ENSG00000227063	RPL41P1	0.266582	-0.832142	0.452606
ENSG00000114480	GBE1	-0.0517151	5.29025	0.453664
ENSG00000207524	RNU6-33P	0.238491	-2.29205	0.456311
ENSG00000182973	CNOT10	-0.0349763	5.41522	0.457104
ENSG00000211734	TRBV5-1	0.11628	2.80425	0.457104
ENSG00000226057	PHF2P2	0.241786	-1.10196	0.457104
ENSG00000272916	RP11-574K11.31	0.150526	0.317935	0.457104
ENSG00000273983	HIST1H3G	-0.175081	2.10244	0.457104
ENSG00000145860	RNF145	-0.0291355	7.06533	0.457353
ENSG00000106133	NSUN5P2	0.0859949	2.89403	0.459314
ENSG00000113282	CLINT1	-0.033403	6.90826	0.459314
ENSG00000135070	ISCA1	0.121591	5.86554	0.459314
ENSG00000275491	RP5-1009E24.8	0.208619	-0.164125	0.459314
ENSG00000159556	ISL2	-0.174032	0.910471	0.459474
ENSG00000172183	ISG20	-0.0724758	6.13597	0.459474
ENSG00000186908	ZDHHC17	-0.0508398	6.8137	0.459474
ENSG00000251728	Y_RNA	-0.128907	0.828659	0.459474
ENSG00000010017	RANBP9	0.0518133	5.68735	0.45971
ENSG00000023734	STRAP	0.0603754	3.80729	0.45971
ENSG00000103316	CRYM	-0.268782	-1.73902	0.45971
ENSG00000162664	ZNF326	-0.0520979	5.11232	0.45971
ENSG00000162913	C1orf145	0.159709	-0.0931952	0.45971
ENSG00000165272	AQP3	0.0936527	4.39611	0.45971
ENSG00000169895	SYAP1	-0.0441412	5.50119	0.45971
ENSG00000187753	C9orf153	0.207595	-0.755444	0.45971
ENSG00000199032	MIR425	-0.212933	-1.30024	0.45971
ENSG00000200304	RNU6-1255P	0.231998	-2.43395	0.45971
ENSG00000273008	RP11-351D16.3	0.144259	-0.0220177	0.45971
ENSG00000170515	PA2G4	0.0710087	5.14306	0.463393
ENSG00000144635	DYNC1LI1	-0.0518105	6.21907	0.46501
ENSG00000171659	GPR34	-0.137117	2.38361	0.46501
ENSG00000256651	RP11-144O23.8	0.213004	-1.16804	0.46501
ENSG00000081052	COL4A4	-0.16643	1.67602	0.465353
ENSG00000196418	ZNF124	0.0820889	4.0889	0.467225
ENSG00000271141	RP11-171I2.4	-0.0937285	2.2382	0.467225
ENSG00000092096	SLC22A17	0.176115	0.307687	0.467743
ENSG00000148450	MSRB2	-0.0850668	3.44738	0.46927
ENSG00000002933	TMEM176A	0.391116	2.05455	0.470268
ENSG00000013374	NUB1	-0.0470098	6.58676	0.470268
ENSG00000100784	RPS6KA5	-0.0614849	7.06701	0.470268
ENSG00000145354	CISD2	0.139404	4.68605	0.470268
ENSG00000164691	TAGAP	-0.0443829	8.50477	0.470268
ENSG00000233070	ZFY-AS1	0.191185	-2.44284	0.470268
ENSG00000238287	RP11-656D10.3	-0.152132	-0.0712294	0.470268
ENSG00000239305	RNF103	-0.0417486	5.52316	0.470268
ENSG00000257315	ZBED6	0.0466466	6.03361	0.470268
ENSG00000114127	XRN1	-0.0509785	8.1679	0.470819
ENSG00000014919	COX15	-0.0303482	5.54387	0.473726
ENSG00000068878	PSME4	0.0647886	7.39468	0.473726
ENSG00000102384	CENPI	0.128359	1.69316	0.473726
ENSG00000111145	ELK3	0.0472986	4.72034	0.473726
ENSG00000113163	COL4A3BP	-0.0328708	7.03791	0.473726
ENSG00000113369	ARRDC3	-0.0836914	8.63629	0.473726
ENSG00000151320	AKAP6	0.153396	2.76302	0.473726
ENSG00000180423	HARBI1	0.0690572	2.34199	0.473726
ENSG00000185475	TMEM179B	-0.0534349	3.5787	0.473726
ENSG00000185650	ZFP36L1	0.0607525	6.12497	0.473726
ENSG00000185905	C16orf54	-0.054715	7.43355	0.473726
ENSG00000207612	MIR604	0.178988	-0.314247	0.473726
ENSG00000239855	IGKV1-6	-0.276426	-0.690996	0.473726
ENSG00000239932	RN7SL606P	0.238625	-1.61378	0.473726
ENSG00000259781	RP11-673C5.1	0.175335	1.52996	0.473726
ENSG00000270426	RP11-326I11.5	-0.0594633	4.25037	0.473726
ENSG00000118369	USP35	0.0737643	2.5397	0.474505
ENSG00000188690	UROS	0.0460597	4.44008	0.474505
ENSG00000256280	RP11-466C23.5	-0.19154	-0.95905	0.474505
ENSG00000263790	MIR4473	-0.17216	-0.411121	0.474505
ENSG00000264322	RN7SL448P	0.217464	-1.76841	0.474505
ENSG00000267519	CTD-3252C9.4	-0.0826437	4.31849	0.474505
ENSG00000125454	SLC25A19	0.0620654	2.86711	0.475094
ENSG00000168913	ENHO	-0.197459	-0.396135	0.475094
ENSG00000205659	LIN52	0.0534544	3.25796	0.475094
ENSG00000163554	SPTA1	0.18703	4.28149	0.475739
ENSG00000198939	ZFP2	0.179756	-0.346828	0.475739
ENSG00000259986	RP11-382A20.4	0.250564	-2.09246	0.475739
ENSG00000006327	TNFRSF12A	-0.103923	1.68967	0.477206
ENSG00000199335	RNU6-204P	-0.232292	-1.98688	0.479534
ENSG00000099282	TSPAN15	0.163784	0.441481	0.480966
ENSG00000104951	IL4I1	0.202345	-0.727017	0.480966
ENSG00000106714	CNTNAP3	-0.18497	5.72595	0.480966
ENSG00000123836	PFKFB2	-0.0783502	4.99395	0.480966
ENSG00000131355	EMR3	-0.0710259	6.96208	0.480966
ENSG00000134531	EMP1	0.165503	1.28335	0.480966
ENSG00000134905	CARS2	-0.0464137	6.5995	0.480966
ENSG00000137449	CPEB2	-0.0604229	5.80111	0.480966
ENSG00000144152	FBLN7	0.116143	2.02043	0.480966
ENSG00000178537	SLC25A20	0.0813283	5.15406	0.480966
ENSG00000197329	PELI1	-0.0529285	8.03052	0.480966
ENSG00000211780	TRAV6	0.151506	0.678303	0.480966
ENSG00000226240	LINC00381	0.222976	-1.18345	0.480966
ENSG00000234782	TPT1P9	0.278908	-0.997126	0.480966
ENSG00000241511	RPS15AP24	0.237762	-2.43019	0.480966
ENSG00000260719	AC009133.17	0.0869942	1.70456	0.480966
ENSG00000281918	Metazoa_SRP	0.196673	-1.11348	0.480966
ENSG00000065135	GNAI3	-0.0327617	8.18177	0.482994
ENSG00000167740	CYB5D2	-0.0704412	2.60867	0.485878
ENSG00000176896	TCEANC	0.0691942	4.44119	0.485878
ENSG00000186469	GNG2	-0.0484148	6.86098	0.485943
ENSG00000092531	SNAP23	-0.0420478	7.51823	0.486519
ENSG00000229729	RP11-159G9.5	-0.0570639	3.85065	0.487036
ENSG00000091129	NRCAM	-0.243395	0.319701	0.487507
ENSG00000179562	GCC1	-0.0393707	6.06997	0.487507
ENSG00000226200	SGMS1-AS1	-0.0585242	4.21845	0.487507
ENSG00000248333	CDK11B	-0.0478501	4.55705	0.487507
ENSG00000273036	FAM95C	0.228762	-1.56637	0.487507
ENSG00000273108	RP11-416N2.4	0.220699	-1.68186	0.487507
ENSG00000213557	RP11-240E2.2	0.224009	-0.772409	0.489841
ENSG00000272103	CTD-2653M23.3	-0.21785	-2.24111	0.489841
ENSG00000232320	AC009299.5	0.198828	-2.75945	0.492021
ENSG00000211895	IGHA1	-0.247754	4.05353	0.492267
ENSG00000274376	ADAMTS7P1	0.168275	-0.278261	0.492267
ENSG00000090989	EXOC1	-0.0417471	6.60251	0.492646
ENSG00000150593	PDCD4	-0.0408264	7.74602	0.492646
ENSG00000184602	SNN	-0.0651249	7.21523	0.492646
ENSG00000188092	GPR89B	-0.0609968	3.44225	0.492646
ENSG00000226221	RPL26P19	0.322414	-1.36353	0.492646
ENSG00000154269	ENPP3	-0.201104	1.39064	0.493135
ENSG00000231485	RP4-535B20.1	-0.150935	-0.334664	0.493135
ENSG00000227688	HNRNPA3P2	-0.203198	-1.05863	0.493993
ENSG00000100321	SYNGR1	0.140002	1.02777	0.494085
ENSG00000005893	LAMP2	-0.0475681	8.33075	0.49436
ENSG00000074657	ZNF532	-0.0794794	3.71423	0.49436
ENSG00000092758	COL9A3	-0.273902	1.42908	0.49436
ENSG00000103047	TANGO6	0.0333933	5.58411	0.49436
ENSG00000116863	ADPRHL2	-0.0570848	4.63179	0.49436
ENSG00000137185	ZSCAN9	-0.0576918	3.87242	0.49436
ENSG00000153574	RPIA	0.135237	5.86275	0.49436
ENSG00000154781	CCDC174	-0.0298476	5.27749	0.49436
ENSG00000156313	RPGR	-0.0659094	5.14911	0.49436
ENSG00000160111	CPAMD8	0.123971	2.19818	0.49436
ENSG00000160216	AGPAT3	0.0509636	5.73895	0.49436
ENSG00000164144	ARFIP1	-0.0559233	5.86988	0.49436
ENSG00000177197	PCNPP5	0.209353	-2.12309	0.49436
ENSG00000182487	NCF1B	-0.0950052	5.40047	0.49436
ENSG00000183762	KREMEN1	0.149192	4.8479	0.49436
ENSG00000227081	RP11-543P15.1	0.361096	0.619627	0.49436
ENSG00000227905	MED6P1	0.252399	-1.38586	0.49436
ENSG00000229358	DPY19L1P1	0.149761	2.47005	0.49436
ENSG00000230006	ANKRD36BP2	0.192513	5.06535	0.49436
ENSG00000231992	RP11-57H12.2	0.238794	-0.794563	0.49436
ENSG00000251804	RNU6-1294P	-0.208417	-1.7207	0.49436
ENSG00000253893	FAM85B	-0.22464	-0.988351	0.49436
ENSG00000268119	CTD-2561J22.5	0.255814	0.779025	0.49436
ENSG00000270062	RP11-248J18.3	-0.0821354	2.30479	0.49436
ENSG00000272825	LL21NC02-1C16.2	0.0985339	2.13961	0.49436
ENSG00000277775	HIST1H3F	-0.128166	2.90875	0.49436
ENSG00000279500	RP11-21K12.2	-0.0719687	4.18153	0.49436
ENSG00000121807	CCR2	0.069866	7.37717	0.494533
ENSG00000226525	RPS7P10	0.286906	-1.93467	0.494533
ENSG00000253797	UTP14C	-0.0351388	5.03317	0.494533
ENSG00000275158	TRBV12-5	0.234912	-1.26864	0.494533
ENSG00000138688	KIAA1109	-0.0490305	9.41392	0.495129
ENSG00000266844	RP11-862L9.3	-0.111741	0.685118	0.495129
ENSG00000100034	PPM1F	-0.066253	7.41368	0.495328
ENSG00000100479	POLE2	0.162371	2.29322	0.495328
ENSG00000103381	CPPED1	-0.0701157	8.76511	0.495328
ENSG00000124226	RNF114	-0.0292831	6.46726	0.495328
ENSG00000132967	HMGB1P5	0.184184	1.89724	0.495328
ENSG00000155636	RBM45	-0.0519499	4.29084	0.495328
ENSG00000167315	ACAA2	0.0604077	4.59658	0.495328
ENSG00000180667	YOD1	0.146469	7.84035	0.495328
ENSG00000211592	IGKC	-0.174763	5.49218	0.495328
ENSG00000280135	RP1-47M23.3	0.0673767	3.3807	0.495328
ENSG00000249693	THEGL	0.240491	-0.401764	0.495881
ENSG00000060237	WNK1	0.105261	8.79279	0.496312
ENSG00000086232	EIF2AK1	0.12625	7.4939	0.496312
ENSG00000138821	SLC39A8	0.0647387	4.60909	0.496312
ENSG00000163689	C3orf67	-0.217912	-1.579	0.496312
ENSG00000180221	TPT1P10	-0.088934	2.31673	0.496312
ENSG00000181192	DHTKD1	-0.0406121	5.94579	0.496312
ENSG00000184905	TCEAL2	0.23866	-2.27913	0.496312
ENSG00000212539	U3	-0.195472	-1.18169	0.496312
ENSG00000081026	MAGI3	0.0881722	2.63212	0.496825
ENSG00000100342	APOL1	-0.0924674	4.85583	0.496825
ENSG00000129244	ATP1B2	0.260306	-1.02476	0.496825
ENSG00000130164	LDLR	0.0997042	3.20956	0.496825
ENSG00000134121	CHL1	-0.233181	0.280104	0.496825
ENSG00000162971	TYW5	-0.0517579	4.46017	0.496825
ENSG00000165115	KIF27	-0.0785965	5.1089	0.496825
ENSG00000180353	HCLS1	-0.0389506	9.24919	0.496825
ENSG00000186715	MST1L	0.234209	-1.82983	0.496825
ENSG00000196668	LINC00173	0.109523	1.7895	0.496825
ENSG00000229124	VIM-AS1	-0.0451181	5.02537	0.496825
ENSG00000234737	KRT18P15	0.193225	0.360605	0.496825
ENSG00000236646	LAMTOR5P1	-0.206124	-1.96167	0.496825
ENSG00000248099	INSL3	0.186159	-0.537812	0.496825
ENSG00000253421	ZNHIT1P1	-0.231205	-1.98801	0.496825
ENSG00000273133	RP11-799M12.2	0.176462	0.793108	0.496825
ENSG00000276718	RP1-102E24.10	-0.0964063	1.43417	0.496825
ENSG00000278047	FP671120.6	0.198019	1.66006	0.496825
ENSG00000278831	RP11-12J10.4	0.17772	-0.810389	0.496825
ENSG00000214389	RPS3AP26	0.348585	-0.134438	0.497978
ENSG00000032219	ARID4A	-0.0452617	7.10782	0.499117
ENSG00000060491	OGFR	-0.0599039	6.50788	0.499117
ENSG00000084110	HAL	-0.0664169	6.77029	0.499117
ENSG00000120948	TARDBP	-0.0351023	6.19245	0.499117
ENSG00000137266	SLC22A23	0.112808	2.54245	0.499117
ENSG00000214279	SCART1	0.126126	2.36111	0.499117
ENSG00000235962	RP11-462L8.2	0.189431	-0.415199	0.499117
ENSG00000237892	KLF7-IT1	-0.0824976	3.37572	0.499117
ENSG00000100483	VCPKMT	-0.0568457	4.52026	0.499216
ENSG00000083896	YTHDC1	-0.0376069	7.40007	0.50141
ENSG00000038427	VCAN	0.0798464	10.4041	0.50396
ENSG00000042429	MED17	-0.0283036	6.04676	0.50396
ENSG00000069943	PIGB	-0.067717	5.87068	0.50396
ENSG00000117450	PRDX1	0.0595165	5.82186	0.50396
ENSG00000127184	COX7C	0.134449	4.64015	0.50396
ENSG00000128656	CHN1	0.13697	1.42309	0.50396
ENSG00000140987	ZSCAN32	-0.0291865	5.03363	0.50396
ENSG00000142867	BCL10	-0.0402183	5.28101	0.50396
ENSG00000163659	TIPARP	-0.0443747	6.27858	0.50396
ENSG00000170892	TSEN34	-0.0663171	6.00362	0.50396
ENSG00000174307	PHLDA3	0.209429	-1.23124	0.50396
ENSG00000182871	COL18A1	-0.142277	5.21798	0.50396
ENSG00000184584	TMEM173	0.0503504	4.97043	0.50396
ENSG00000196227	FAM217B	-0.0372068	5.52442	0.50396
ENSG00000197852	FAM212B	-0.0704355	7.07609	0.50396
ENSG00000198830	HMGN2	-0.0498569	6.63516	0.50396
ENSG00000205220	PSMB10	-0.0767381	5.00896	0.50396
ENSG00000213390	ARHGAP19	-0.0505598	5.45054	0.50396
ENSG00000213598	RP11-112J1.1	0.268382	-2.26311	0.50396
ENSG00000214784	AC010468.1	0.31569	-1.13391	0.50396
ENSG00000234287	RP11-761N21.2	0.33508	-0.457384	0.50396
ENSG00000235863	B3GALT4	-0.0586571	4.8593	0.50396
ENSG00000237082	COX5BP6	0.194946	-1.22254	0.50396
ENSG00000243064	ABCC13	0.195183	3.31861	0.50396
ENSG00000254999	BRK1	0.0545453	5.86954	0.50396
ENSG00000262049	RP13-1032I1.7	-0.0845685	2.15504	0.50396
ENSG00000263961	C1orf186	-0.108223	2.62663	0.50396
ENSG00000270067	CTC-487M23.5	0.120198	0.56344	0.50396
ENSG00000272282	RP11-222K16.2	-0.137277	1.59346	0.50396
ENSG00000277496	RP11-93B14.9	-0.0709941	3.44364	0.50396
ENSG00000178538	CA8	-0.186874	1.39863	0.504389
ENSG00000275759	RP11-131L12.3	0.143716	0.211522	0.505014
ENSG00000143369	ECM1	0.213227	-2.03161	0.508341
ENSG00000172215	CXCR6	-0.140287	3.40185	0.512163
ENSG00000240966	RN7SL681P	-0.102647	1.06214	0.51608
ENSG00000123349	PFDN5	0.12729	6.16914	0.517132
ENSG00000169429	CXCL8	0.185412	3.43809	0.520311
ENSG00000133065	SLC41A1	0.0730893	2.65408	0.520929
ENSG00000123130	ACOT9	-0.0480805	5.647	0.52142
ENSG00000028277	POU2F2	0.0779899	4.62665	0.522237
ENSG00000107672	NSMCE4A	0.047404	4.75713	0.522237
ENSG00000135148	TRAFD1	-0.052556	6.38388	0.522237
ENSG00000214999	AC129492.6	-0.127555	0.264366	0.522237
ENSG00000243317	C7orf73	0.0969071	5.52854	0.522237
ENSG00000133477	FAM83F	-0.200749	0.242101	0.52259
ENSG00000198771	RCSD1	-0.0350351	8.27526	0.52259
ENSG00000146859	TMEM140	-0.0662218	7.40929	0.523051
ENSG00000237298	TTN-AS1	-0.0553763	7.26064	0.523051
ENSG00000010610	CD4	0.0608142	6.2353	0.523663
ENSG00000066455	GOLGA5	-0.0322621	5.66258	0.523663
ENSG00000071189	SNX13	-0.0395391	7.44343	0.523663
ENSG00000079950	STX7	-0.0471924	8.38331	0.523663
ENSG00000105926	MPP6	0.0738388	4.43811	0.523663
ENSG00000107938	EDRF1	-0.0319063	6.03586	0.523663
ENSG00000118777	ABCG2	0.175211	2.4206	0.523663
ENSG00000122432	SPATA1	-0.135519	0.376491	0.523663
ENSG00000128383	APOBEC3A	-0.0778676	7.2625	0.523663
ENSG00000132938	MTUS2	0.237863	-1.32819	0.523663
ENSG00000139370	SLC15A4	-0.0476073	7.19907	0.523663
ENSG00000139505	MTMR6	-0.0448102	6.74914	0.523663
ENSG00000139737	SLAIN1	0.0456067	4.58378	0.523663
ENSG00000140545	MFGE8	0.0959584	2.12697	0.523663
ENSG00000153391	INO80C	-0.0537922	2.79007	0.523663
ENSG00000158578	ALAS2	0.21763	10.8425	0.523663
ENSG00000158773	USF1	-0.0428091	6.76419	0.523663
ENSG00000164463	CREBRF	-0.0385796	8.17391	0.523663
ENSG00000166451	CENPN	0.0995965	1.31753	0.523663
ENSG00000167703	SLC43A2	-0.0697169	6.75932	0.523663
ENSG00000172164	SNTB1	0.0419476	5.46726	0.523663
ENSG00000173334	TRIB1	-0.0580065	5.45548	0.523663
ENSG00000173898	SPTBN2	-0.215615	-1.98569	0.523663
ENSG00000178301	AQP11	-0.210181	-2.09747	0.523663
ENSG00000186074	CD300LF	-0.0496277	5.86766	0.523663
ENSG00000186787	SPIN2B	0.104132	0.796827	0.523663
ENSG00000197442	MAP3K5	-0.0351615	7.86234	0.523663
ENSG00000204580	DDR1	0.121231	0.926477	0.523663
ENSG00000214629	RPSAP6	0.108118	1.58791	0.523663
ENSG00000217027	TPT1P4	0.241582	-1.6546	0.523663
ENSG00000221957	KIR2DS4	-0.301766	-0.0723746	0.523663
ENSG00000233690	EBAG9P1	0.170642	-0.187291	0.523663
ENSG00000239713	APOBEC3G	-0.0664396	5.85357	0.523663
ENSG00000241318	WDR82P2	-0.201511	-1.82371	0.523663
ENSG00000242258	LINC00996	-0.142721	0.409424	0.523663
ENSG00000248323	LUCAT1	-0.0708874	6.94741	0.523663
ENSG00000253537	PCDHGA7	-0.180661	-0.138296	0.523663
ENSG00000254288	RP11-6I2.3	0.195443	-0.446413	0.523663
ENSG00000257156	RP11-13A1.3	-0.236883	-0.1519	0.523663
ENSG00000257704	INAFM1	-0.103906	1.06845	0.523663
ENSG00000258411	RP11-804M7.2	-0.210549	-2.23841	0.523663
ENSG00000260865	CTA-331F8.1	0.197897	-0.811363	0.523663
ENSG00000264635	RP11-769O8.3	-0.195081	-1.13528	0.523663
ENSG00000266865	RP11-848P1.9	0.102436	0.829519	0.523663
ENSG00000273373	RP5-1074L1.4	-0.0668874	3.98432	0.523663
ENSG00000274267	HIST1H3B	-0.140252	3.32229	0.523663
ENSG00000277117	ICOSLG	0.232097	-1.9536	0.523663
ENSG00000248774	RP11-798M19.3	-0.0939539	1.96026	0.523671
ENSG00000138604	GLCE	0.0479944	4.13792	0.52475
ENSG00000249915	PDCD6	-0.0294348	6.22493	0.52475
ENSG00000182985	CADM1	-0.145898	1.54987	0.525391
ENSG00000108854	SMURF2	-0.033983	5.8034	0.526762
ENSG00000116044	NFE2L2	0.0278084	6.94708	0.526762
ENSG00000213842	SUGT1P2	-0.109106	0.813719	0.526762
ENSG00000005882	PDK2	0.0994403	3.23394	0.529223
ENSG00000008394	MGST1	0.082381	2.94549	0.529223
ENSG00000064270	ATP2C2	-0.249873	-0.557646	0.529223
ENSG00000073711	PPP2R3A	0.164037	-0.102068	0.529223
ENSG00000078804	TP53INP2	-0.129082	2.0256	0.529223
ENSG00000101132	PFDN4	0.133758	1.35106	0.529223
ENSG00000104219	ZDHHC2	0.0668041	6.67056	0.529223
ENSG00000105656	ELL	-0.0618838	5.46497	0.529223
ENSG00000109756	RAPGEF2	-0.0516146	7.32028	0.529223
ENSG00000110958	PTGES3	0.0577738	5.99537	0.529223
ENSG00000118507	AKAP7	0.0742991	3.83231	0.529223
ENSG00000119457	SLC46A2	0.0807146	3.34909	0.529223
ENSG00000123965	PMS2P5	-0.18938	-0.538276	0.529223
ENSG00000130775	THEMIS2	-0.0507837	8.59226	0.529223
ENSG00000135144	DTX1	0.126982	1.49827	0.529223
ENSG00000140284	SLC27A2	-0.150281	0.431292	0.529223
ENSG00000141293	SKAP1	0.0576582	4.85166	0.529223
ENSG00000144741	SLC25A26	-0.0397829	4.20645	0.529223
ENSG00000156675	RAB11FIP1	-0.0585342	8.71971	0.529223
ENSG00000156787	TBC1D31	0.0611735	5.41519	0.529223
ENSG00000157168	NRG1	0.195067	3.26983	0.529223
ENSG00000162599	NFIA	0.0864014	3.79852	0.529223
ENSG00000162849	KIF26B	0.229854	-1.84276	0.529223
ENSG00000163462	TRIM46	0.13059	0.186865	0.529223
ENSG00000163719	MTMR14	-0.0348052	6.46363	0.529223
ENSG00000166278	C2	0.133399	0.43878	0.529223
ENSG00000170074	FAM153A	0.171427	2.59345	0.529223
ENSG00000172331	BPGM	0.179957	7.29694	0.529223
ENSG00000173171	MTX1	-0.0573594	4.97786	0.529223
ENSG00000173372	C1QA	-0.184746	1.34089	0.529223
ENSG00000178075	GRAMD1C	-0.109228	4.06171	0.529223
ENSG00000180611	MB21D2	0.103875	2.34666	0.529223
ENSG00000183625	CCR3	-0.121202	5.45538	0.529223
ENSG00000196369	SRGAP2B	-0.0807047	2.76423	0.529223
ENSG00000211807	TRAV26-1	0.126233	1.30953	0.529223
ENSG00000215414	PSMA6P1	0.225849	-2.21616	0.529223
ENSG00000227815	RP11-195C7.3	0.213524	-2.05558	0.529223
ENSG00000249839	AC011330.5	0.222734	-2.04732	0.529223
ENSG00000255801	RP11-561P12.5	-0.140008	3.53312	0.529223
ENSG00000272056	RP11-503P10.1	-0.124642	-0.00268573	0.529223
ENSG00000273781	AL138898.1	-0.210356	-1.91581	0.529223
ENSG00000062524	LTK	0.14651	1.47902	0.529525
ENSG00000183506	PI4KAP2	0.114584	1.54905	0.529525
ENSG00000232838	PET117	0.129607	0.199956	0.529525
ENSG00000118816	CCNI	0.0856025	7.88079	0.529975
ENSG00000131669	NINJ1	-0.0805314	5.8242	0.529975
ENSG00000179409	GEMIN4	0.046658	4.18211	0.529975
ENSG00000166912	MTMR10	-0.0401535	7.44119	0.533603
ENSG00000261804	RP11-44F14.2	-0.130633	3.38465	0.534516
ENSG00000004478	FKBP4	0.0484974	4.47174	0.53551
ENSG00000169288	MRPL1	0.0942292	2.66401	0.53551
ENSG00000180357	ZNF609	0.052634	6.23019	0.53551
ENSG00000211710	TRBV4-1	0.187058	0.845137	0.53551
ENSG00000076043	REXO2	0.0567262	4.47459	0.537054
ENSG00000269800	PLEKHA3P1	0.143306	0.259497	0.537054
ENSG00000064763	FAR2	-0.0665321	5.78883	0.537084
ENSG00000103512	NOMO1	0.0693574	3.59233	0.537084
ENSG00000163739	CXCL1	0.110778	1.68462	0.537084
ENSG00000171488	LRRC8C	0.0430175	6.7765	0.537084
ENSG00000178429	RPS3AP5	0.270479	0.459761	0.537084
ENSG00000182183	FAM159A	0.066701	3.34718	0.537084
ENSG00000204179	PTPN20A	0.240794	-1.24519	0.537084
ENSG00000213468	FIRRE	0.133435	0.780358	0.537084
ENSG00000271122	RP11-379H18.1	0.0659533	2.28315	0.537084
ENSG00000112053	SLC26A8	0.124225	3.04635	0.538183
ENSG00000182899	RPL35A	0.12074	6.76498	0.538183
ENSG00000133112	TPT1	0.148728	9.26392	0.538559
ENSG00000254266	RP11-594N15.2	0.221198	-1.48136	0.542201
ENSG00000145241	CENPC	-0.0446317	6.51251	0.542949
ENSG00000123091	RNF11	0.124812	7.11239	0.544085
ENSG00000133612	AGAP3	0.0615305	3.3451	0.544085
ENSG00000142798	HSPG2	0.158066	-0.0274939	0.544399
ENSG00000274425	AC114271.2	-0.163931	-0.711725	0.544995
ENSG00000211970	IGHV4-61	-0.226668	-2.42008	0.545448
ENSG00000113761	ZNF346	0.0577866	4.09036	0.549492
ENSG00000266744	RP11-131K5.1	0.18912	-0.832565	0.549492
ENSG00000009307	CSDE1	0.0405694	9.40705	0.549579
ENSG00000011422	PLAUR	-0.0688366	5.95518	0.549579
ENSG00000158571	PFKFB1	0.155339	-0.498532	0.549579
ENSG00000181544	FANCB	0.0747544	2.79319	0.549676
ENSG00000102901	CENPT	0.0648308	3.11001	0.55177
ENSG00000108424	KPNB1	-0.0297658	8.08101	0.55177
ENSG00000230897	RPS18P12	0.272784	-0.736651	0.55177
ENSG00000251867	RP11-48B3.5	-0.178836	-1.0729	0.55177
ENSG00000264536	MIR5706	0.193193	-1.13821	0.55177
ENSG00000272146	RP11-755B10.4	0.138183	0.151648	0.55177
ENSG00000158715	SLC45A3	-0.182154	2.15278	0.553891
ENSG00000226180	RP11-278A23.1	-0.118209	0.485057	0.553891
ENSG00000215915	ATAD3C	0.216311	-1.74468	0.554197
ENSG00000253910	PCDHGB2	-0.155075	0.410522	0.556457
ENSG00000127951	FGL2	-0.0657125	9.62648	0.556571
ENSG00000219928	RP11-40C6.2	0.191908	0.38048	0.558086
ENSG00000140694	PARN	-0.028112	5.79095	0.558395
ENSG00000234222	RP11-315I20.1	-0.200551	-1.39808	0.559278
ENSG00000143751	SDE2	-0.0393048	5.69218	0.560038
ENSG00000151883	PARP8	-0.0392919	9.04384	0.560665
ENSG00000188211	NCR3LG1	-0.0827899	2.59086	0.560665
ENSG00000268615	RP11-65J3.15	0.207444	-1.83131	0.560665
ENSG00000001084	GCLC	0.0793023	5.32217	0.560882
ENSG00000071082	RPL31	0.17634	6.20002	0.560882
ENSG00000107566	ERLIN1	-0.0486727	4.98591	0.560882
ENSG00000125779	PANK2	-0.0255064	6.4049	0.560882
ENSG00000138185	ENTPD1	-0.0557601	8.04523	0.560882
ENSG00000163219	ARHGAP25	-0.0362818	8.81913	0.560882
ENSG00000180185	FAHD1	0.0868521	3.42222	0.560882
ENSG00000183458	RP11-958N24.1	0.111436	-0.103339	0.560882
ENSG00000211803	TRAV23DV6	0.149197	1.51177	0.560882
ENSG00000221988	PPT2	-0.123773	0.22261	0.560882
ENSG00000239272	RPL21P10	-0.159016	-0.455968	0.560882
ENSG00000259673	IQCH-AS1	0.0610531	2.80295	0.560882
ENSG00000138175	ARL3	0.0650823	2.41713	0.560939
ENSG00000196381	ZNF781	0.12425	1.36721	0.560939
ENSG00000151702	FLI1	-0.0221441	7.96916	0.561431
ENSG00000137474	MYO7A	0.131613	0.854001	0.562409
ENSG00000141741	MIEN1	-0.0608178	2.89555	0.562409
ENSG00000164292	RHOBTB3	0.0827242	3.94548	0.562409
ENSG00000261997	RP11-212I21.4	-0.0806015	4.0595	0.562409
ENSG00000113504	SLC12A7	0.120713	4.57908	0.562495
ENSG00000116017	ARID3A	-0.0612096	5.38226	0.562495
ENSG00000131174	COX7B	0.110953	3.64211	0.562495
ENSG00000139044	B4GALNT3	-0.238212	1.6997	0.562495
ENSG00000141526	SLC16A3	-0.0731663	7.48184	0.562495
ENSG00000151490	PTPRO	0.0733698	4.26055	0.562495
ENSG00000161217	PCYT1A	-0.0298893	6.85148	0.562495
ENSG00000162702	ZNF281	-0.0459888	6.71281	0.562495
ENSG00000164073	MFSD8	-0.0406085	5.10011	0.562495
ENSG00000196652	ZKSCAN5	-0.0357365	4.78627	0.562495
ENSG00000204010	IFIT1B	0.201622	5.3673	0.562495
ENSG00000224415	RP11-401L13.4	0.115146	0.565313	0.562495
ENSG00000227776	AKR1D1P1	0.191099	-0.988216	0.562495
ENSG00000241258	CRCP	-0.0318066	4.84991	0.562495
ENSG00000252192	SNORA9	-0.150592	-0.514223	0.562495
ENSG00000253483	CTC-756D1.1	0.224388	-2.15699	0.562495
ENSG00000255647	CTD-2373J6.2	0.196908	-1.25421	0.562495
ENSG00000257599	OVCH1-AS1	0.387812	-0.13825	0.562495
ENSG00000264792	MIR4637	-0.19167	-2.43772	0.562495
ENSG00000278272	HIST1H3C	-0.136975	2.45334	0.562495
ENSG00000101782	RIOK3	0.122574	8.49099	0.563193
ENSG00000102699	PARP4	-0.0352152	7.69741	0.563193
ENSG00000182901	RGS7	-0.195011	-1.08485	0.563193
ENSG00000223551	TMSB4XP4	-0.154244	-0.332223	0.563193
ENSG00000146872	TLK2	-0.0271573	5.99345	0.563272
ENSG00000133895	MEN1	0.0610229	2.93613	0.56464
ENSG00000198643	FAM3D	-0.216826	-2.11963	0.564999
ENSG00000214465	SMARCE1P6	0.161431	-0.683762	0.56518
ENSG00000219507	FTH1P8	0.236392	-1.16929	0.56518
ENSG00000160741	CRTC2	0.0684351	3.74935	0.566322
ENSG00000165175	MID1IP1	-0.0570816	5.80878	0.566794
ENSG00000180992	MRPL14	0.0603457	3.03047	0.567201
ENSG00000235174	RPL39P3	0.328623	0.170383	0.567201
ENSG00000111676	ATN1	0.129158	0.653144	0.567431
ENSG00000269967	RP11-84A19.4	-0.106325	1.16709	0.567431
ENSG00000076662	ICAM3	-0.067673	8.6795	0.568346
ENSG00000087253	LPCAT2	-0.0510631	7.22833	0.568346
ENSG00000099957	P2RX6	0.194231	-1.48808	0.568346
ENSG00000104043	ATP8B4	-0.0621374	5.90619	0.568346
ENSG00000107164	FUBP3	-0.0269159	5.26604	0.568346
ENSG00000110315	RNF141	-0.0536711	6.84065	0.568346
ENSG00000112077	RHAG	0.169804	1.79985	0.568346
ENSG00000117410	ATP6V0B	-0.0536044	7.11428	0.568346
ENSG00000119402	FBXW2	-0.0252279	7.25182	0.568346
ENSG00000122644	ARL4A	0.121127	4.66761	0.568346
ENSG00000130816	DNMT1	0.0408479	6.14165	0.568346
ENSG00000135164	DMTF1	-0.0351989	7.46233	0.568346
ENSG00000136279	DBNL	-0.0434874	8.45407	0.568346
ENSG00000137726	FXYD6	-0.12709	0.448646	0.568346
ENSG00000143198	MGST3	0.0493795	4.7087	0.568346
ENSG00000148840	PPRC1	0.0738801	2.97082	0.568346
ENSG00000154845	PPP4R1	-0.0446249	7.88109	0.568346
ENSG00000158169	FANCC	-0.055723	2.84797	0.568346
ENSG00000159322	ADPGK	-0.0302637	7.46158	0.568346
ENSG00000170293	CMTM8	0.164214	-0.0251164	0.568346
ENSG00000177427	MIEF2	-0.0541762	3.24604	0.568346
ENSG00000177879	AP3S1	-0.053339	4.67209	0.568346
ENSG00000178694	NSUN3	0.0680293	5.86723	0.568346
ENSG00000184990	SIVA1	-0.0535138	4.05151	0.568346
ENSG00000200164	Y_RNA	0.193429	-2.13699	0.568346
ENSG00000203414	BTBD7P1	0.207291	-0.836388	0.568346
ENSG00000213757	CTC-451P13.1	0.232919	-2.20699	0.568346
ENSG00000225945	RP3-441A12.1	0.176415	-0.893482	0.568346
ENSG00000226530	RP11-348F1.2	-0.159513	-0.311244	0.568346
ENSG00000230091	TMEM254-AS1	0.180192	-0.947467	0.568346
ENSG00000237576	AC097495.2	0.112677	0.44638	0.568346
ENSG00000239948	RN7SL368P	-0.11014	0.913571	0.568346
ENSG00000249437	NAIP	0.119337	5.53343	0.568346
ENSG00000259746	HSPE1P3	0.165757	-0.649093	0.568346
ENSG00000266472	MRPS21	0.0627794	4.04461	0.568346
ENSG00000266473	RP11-401F2.3	0.186897	-2.38549	0.568346
ENSG00000267787	RP11-35G9.5	0.0643524	2.44736	0.568346
ENSG00000276696	Y_RNA	0.191904	-2.23724	0.568346
ENSG00000276900	RP11-467L13.7	0.0815709	4.1092	0.568346
ENSG00000065243	PKN2	-0.0429527	7.33264	0.568411
ENSG00000106772	PRUNE2	-0.244367	0.884979	0.568411
ENSG00000128268	MGAT3	-0.111281	1.65224	0.568411
ENSG00000139132	FGD4	-0.0510243	6.65564	0.568411
ENSG00000181634	TNFSF15	0.159376	0.389042	0.568411
ENSG00000183018	SPNS2	-0.139748	0.243374	0.568411
ENSG00000207808	MIR27A	-0.173202	-1.19995	0.568411
ENSG00000111674	ENO2	0.062761	3.7843	0.568491
ENSG00000129493	HEATR5A	-0.0524058	4.89832	0.569957
ENSG00000170430	MGMT	-0.0589763	3.25705	0.569957
ENSG00000197622	CDC42SE1	-0.0292921	9.70423	0.570284
ENSG00000231327	AC016700.5	-0.191327	-1.38047	0.570284
ENSG00000138592	USP8	-0.025835	7.03015	0.57048
ENSG00000101546	RBFA	0.0544671	2.58845	0.573049
ENSG00000066185	ZMYND12	0.167682	-0.811146	0.573421
ENSG00000066382	MPPED2	-0.219992	-1.43609	0.574896
ENSG00000102043	MTMR8	0.0548334	3.00155	0.574896
ENSG00000107130	NCS1	0.206195	-2.14065	0.574896
ENSG00000108924	HLF	0.13483	0.359147	0.574896
ENSG00000134882	UBAC2	0.0280555	5.77987	0.574896
ENSG00000138411	HECW2	-0.0896432	3.69941	0.574896
ENSG00000154589	LY96	0.0977321	3.50913	0.574896
ENSG00000164112	TMEM155	-0.215692	-2.43985	0.574896
ENSG00000175556	LONRF3	0.0592771	3.58447	0.574896
ENSG00000179104	TMTC2	0.0580107	4.53565	0.574896
ENSG00000197721	CR1L	0.150941	3.84945	0.574896
ENSG00000211598	IGKV4-1	-0.169971	3.28998	0.574896
ENSG00000211664	IGLV2-18	-0.224376	-2.21478	0.574896
ENSG00000226268	RP11-61N20.3	0.152686	-2.64063	0.574896
ENSG00000234160	RP11-613M10.6	0.105981	0.385861	0.574896
ENSG00000259935	RP11-519C12.1	-0.0863388	2.08436	0.574896
ENSG00000274536	RP6-159A1.4	-0.0499632	8.10106	0.574896
ENSG00000173166	RAPH1	0.10661	2.63794	0.575169
ENSG00000275791	TRBV10-3	0.13085	1.3426	0.575169
ENSG00000129472	RAB2B	0.132669	6.88603	0.575297
ENSG00000139842	CUL4A	0.0457787	6.87159	0.575297
ENSG00000140463	BBS4	-0.0448325	3.73766	0.575297
ENSG00000172232	AZU1	-0.21813	-0.437131	0.575297
ENSG00000279491	RP11-810P12.7	-0.0669245	2.22846	0.575297
ENSG00000068079	IFI35	-0.0950103	4.92247	0.575798
ENSG00000046604	DSG2	-0.211403	-1.73988	0.57672
ENSG00000109475	RPL34	0.176346	5.42032	0.57672
ENSG00000158473	CD1D	-0.0544863	5.35948	0.57672
ENSG00000184923	NUTM2A	0.204148	-2.19396	0.57672
ENSG00000211896	IGHG1	-0.187312	3.34842	0.57672
ENSG00000088682	COQ9	-0.0299502	4.45412	0.577963
ENSG00000136754	ABI1	-0.0254264	7.47867	0.57812
ENSG00000043093	DCUN1D1	0.0730777	6.71377	0.578708
ENSG00000124102	PI3	0.177728	4.47534	0.578708
ENSG00000143674	MLK4	0.0858178	1.54981	0.578708
ENSG00000173926	2021-03-03	0.0952348	2.87299	0.578708
ENSG00000198873	GRK5	-0.0443938	5.08459	0.578708
ENSG00000232031	RP5-991C6.4	-0.103763	1.06448	0.578708
ENSG00000086730	LAT2	-0.050142	7.18763	0.578925
ENSG00000189077	TMEM120A	-0.0615547	4.51184	0.578925
ENSG00000100485	SOS2	-0.0394954	7.42144	0.58018
ENSG00000100605	ITPK1	-0.0663844	6.62257	0.58018
ENSG00000146676	PURB	-0.0445273	7.01742	0.58018
ENSG00000182508	LHFPL1	0.19021	-1.47225	0.58018
ENSG00000253986	CTC-756D1.3	0.191723	0.0228769	0.58018
ENSG00000048392	RRM2B	-0.0494506	6.60052	0.580783
ENSG00000099968	BCL2L13	0.0594752	5.95511	0.580783
ENSG00000133606	MKRN1	0.121281	10.2505	0.580783
ENSG00000176222	ZNF404	0.142245	0.550533	0.580783
ENSG00000134007	ADAM20	-0.117091	1.62008	0.580997
ENSG00000077616	NAALAD2	-0.236369	-2.30956	0.582029
ENSG00000110693	SOX6	0.141634	5.26117	0.585283
ENSG00000113391	FAM172A	-0.0372521	5.60744	0.585283
ENSG00000126254	RBM42	-0.0656656	3.08127	0.585283
ENSG00000142687	KIAA0319L	-0.0515488	6.36246	0.585283
ENSG00000169902	TPST1	-0.127094	3.83762	0.585283
ENSG00000204599	TRIM39	-0.035259	4.46829	0.585283
ENSG00000207980	MIR23A	-0.120893	0.556575	0.585283
ENSG00000214485	RPL7P1	0.295624	-0.516844	0.585283
ENSG00000243896	OR2A7	0.211401	-2.13481	0.585283
ENSG00000264958	ALOX12P1	0.169272	-0.784387	0.585283
ENSG00000265972	TXNIP	-0.0624987	11.9931	0.585283
ENSG00000272661	RP4-548D19.3	-0.0929166	0.803641	0.585283
ENSG00000275638	RP11-16E23.5	-0.0801307	1.63936	0.585283
ENSG00000279236	RP11-120K19.3	-0.103206	3.00229	0.585283
ENSG00000279765	RP11-437B10.1	-0.0621713	4.52402	0.585283
ENSG00000007944	MYLIP	-0.0502197	6.69751	0.585489
ENSG00000106785	TRIM14	0.0689883	4.9899	0.585489
ENSG00000118690	ARMC2	-0.0612981	3.50092	0.585489
ENSG00000122696	SLC25A51	0.044506	4.53834	0.585489
ENSG00000138326	RPS24	0.1317	6.59616	0.585489
ENSG00000183765	CHEK2	0.0590797	2.74609	0.585489
ENSG00000100614	PPM1A	0.0715372	8.18978	0.585716
ENSG00000140854	KATNB1	-0.0612254	3.21818	0.585716
ENSG00000186453	FAM228A	0.195979	-1.63434	0.585716
ENSG00000279495	RP11-521B24.4	0.107891	0.960161	0.585716
ENSG00000025800	KPNA6	0.038993	6.3647	0.586123
ENSG00000077063	CTTNBP2	-0.220637	-0.78242	0.586123
ENSG00000150540	HNMT	0.0806772	3.98207	0.586123
ENSG00000231503	PTMAP4	0.125062	-0.23129	0.586123
ENSG00000279138	KB-1742H10.3	-0.201993	-2.21736	0.586123
ENSG00000130703	OSBPL2	-0.0378179	6.98649	0.586729
ENSG00000141582	CBX4	-0.0445744	4.17259	0.586729
ENSG00000148297	MED22	-0.0433573	5.62017	0.586729
ENSG00000166747	AP1G1	-0.030203	7.40439	0.586729
ENSG00000196730	DAPK1	-0.0741075	5.8559	0.586729
ENSG00000109016	DHRS7B	-0.0373696	4.17232	0.587876
ENSG00000112293	GPLD1	0.129649	1.34031	0.587876
ENSG00000132604	TERF2	0.0356602	4.56113	0.587876
ENSG00000120868	APAF1	-0.042856	7.82621	0.588589
ENSG00000154229	PRKCA	0.0687378	5.99873	0.588589
ENSG00000172775	FAM192A	-0.0220643	6.63433	0.588589
ENSG00000180581	SRP9P1	0.226145	-1.07957	0.588589
ENSG00000197157	SND1	0.0419093	7.15365	0.588589
ENSG00000213694	S1PR3	0.0815656	3.8967	0.588589
ENSG00000148655	C10orf11	0.108277	2.30594	0.589099
ENSG00000070731	ST6GALNAC2	-0.088385	4.71418	0.590302
ENSG00000008226	DLEC1	0.0766923	2.57818	0.592535
ENSG00000012822	CALCOCO1	-0.0395842	6.88337	0.592535
ENSG00000049759	NEDD4L	0.10829	3.73226	0.592535
ENSG00000065621	GSTO2	-0.0988909	0.756537	0.592535
ENSG00000077684	JADE1	-0.0310669	6.76414	0.592535
ENSG00000100991	TRPC4AP	-0.0248504	7.10884	0.592535
ENSG00000115145	STAM2	-0.0361599	6.18257	0.592535
ENSG00000115350	POLE4	0.0552341	3.60628	0.592535
ENSG00000122870	BICC1	-0.222213	-1.21634	0.592535
ENSG00000126368	NR1D1	0.139443	-0.191297	0.592535
ENSG00000132010	ZNF20	-0.0981387	1.05532	0.592535
ENSG00000132561	MATN2	0.21734	-1.22171	0.592535
ENSG00000136051	KIAA1033	-0.047563	8.36607	0.592535
ENSG00000138433	CIR1	-0.0432605	5.76252	0.592535
ENSG00000140836	ZFHX3	0.0878228	3.35997	0.592535
ENSG00000153531	ADPRHL1	-0.142543	-0.499723	0.592535
ENSG00000154451	GBP5	-0.107542	9.00705	0.592535
ENSG00000157045	NTAN1	0.0728894	4.28855	0.592535
ENSG00000165300	SLITRK5	0.210501	-0.268455	0.592535
ENSG00000173567	GPR113	0.149203	-0.53705	0.592535
ENSG00000179542	SLITRK4	0.0916292	2.68746	0.592535
ENSG00000181826	RELL1	-0.0596278	5.26274	0.592535
ENSG00000183020	AP2A2	0.0402421	5.00594	0.592535
ENSG00000184047	DIABLO	-0.042051	3.42301	0.592535
ENSG00000186280	KDM4D	0.186768	-1.55037	0.592535
ENSG00000197694	SPTAN1	0.0559536	7.50707	0.592535
ENSG00000223547	ZNF844	-0.0811497	5.21634	0.592535
ENSG00000226149	RP1-69D17.4	0.17774	-1.04301	0.592535
ENSG00000226754	RP5-1024G6.5	0.193191	-1.86559	0.592535
ENSG00000228439	TSTD3	0.158111	-0.045212	0.592535
ENSG00000233270	SNRPEP4	0.189478	-2.02394	0.592535
ENSG00000236928	RP11-792A8.1	-0.192497	-2.16093	0.592535
ENSG00000257497	RP11-585P4.5	0.117849	0.429976	0.592535
ENSG00000267174	CTC-510F12.4	-0.13304	2.09792	0.592535
ENSG00000280384	RP4-695O20.1	-0.109184	0.308002	0.592535
ENSG00000116337	AMPD2	-0.0680278	7.07487	0.592615
ENSG00000137970	RPL7P9	0.287018	0.644334	0.592615
ENSG00000243385	CTD-2110K23.1	0.171176	-1.13655	0.592615
ENSG00000204344	STK19	-0.04399	3.36626	0.593973
ENSG00000238160	AC116366.5	-0.0603259	5.4938	0.593973
ENSG00000280730	AC090181.1	-0.2048	-1.87455	0.593973
ENSG00000012048	BRCA1	-0.049495	4.44699	0.595821
ENSG00000136244	IL6	-0.202747	-2.22627	0.595821
ENSG00000251593	MSNP1	0.195723	-1.31546	0.595821
ENSG00000197558	SSPO	0.132543	0.287719	0.596487
ENSG00000038358	EDC4	0.0460205	4.52747	0.598507
ENSG00000103485	QPRT	-0.121565	0.137858	0.598507
ENSG00000132326	PER2	0.0676222	2.85105	0.598507
ENSG00000132465	IGJ	-0.189544	5.0365	0.598507
ENSG00000166503	HDGFRP3	0.109755	3.02416	0.598507
ENSG00000188243	COMMD6	0.16382	2.62251	0.598507
ENSG00000213090	AC007256.5	0.077312	3.21605	0.598507
ENSG00000226026	RP11-57H12.3	0.205524	-1.4171	0.598507
ENSG00000232871	SEC1P	-0.191316	-2.20878	0.598507
ENSG00000258301	RP11-488C13.5	0.0732165	1.56522	0.598507
ENSG00000271254	AC240274.1	0.0936095	2.58923	0.598507
ENSG00000276924	FP236383.9	0.163651	3.30013	0.598507
ENSG00000121413	ZSCAN18	-0.0731591	4.30953	0.599825
ENSG00000170027	YWHAG	0.0336758	6.48587	0.601274
ENSG00000129292	PHF20L1	-0.0392312	8.26217	0.602854
ENSG00000265728	RP11-883A18.3	0.20059	-2.05515	0.602854
ENSG00000003402	CFLAR	-0.0404737	10.1988	0.603747
ENSG00000110042	DTX4	-0.086154	3.39408	0.603747
ENSG00000147174	ACRC	0.0542198	2.97462	0.603747
ENSG00000179604	CDC42EP4	-0.0745226	2.0335	0.603747
ENSG00000199165	MIRLET7A1	-0.134666	-0.144397	0.603747
ENSG00000211887	TRAJ2	0.106815	0.802434	0.603747
ENSG00000224550	RP11-270C12.3	0.185773	-2.69106	0.603747
ENSG00000229798	KRT18P26	0.191207	-1.92838	0.603747
ENSG00000232472	EEF1B2P3	0.268785	-0.463274	0.603747
ENSG00000237649	KIFC1	-0.139299	0.170051	0.603747
ENSG00000239951	IGKV3-20	-0.151752	3.52189	0.603747
ENSG00000021488	SLC7A9	0.192459	-2.26772	0.605479
ENSG00000110721	CHKA	-0.0618946	2.72616	0.605479
ENSG00000131037	EPS8L1	-0.159189	-0.684523	0.605479
ENSG00000131351	HAUS8	0.0536438	2.51454	0.605479
ENSG00000132109	TRIM21	-0.0512295	6.25822	0.605479
ENSG00000152270	PDE3B	-0.0457822	7.78038	0.605479
ENSG00000156299	TIAM1	0.0587022	6.47331	0.605479
ENSG00000187994	RINL	-0.0383795	4.94478	0.605479
ENSG00000198336	MYL4	0.175385	3.3314	0.605479
ENSG00000230715	RP11-274B21.4	0.169744	-0.932606	0.605479
ENSG00000266900	RP11-173A16.2	-0.0701374	2.6265	0.605479
ENSG00000268670	CTD-2622I13.3	-0.0764245	2.32264	0.605479
ENSG00000270956	RP11-65L3.4	-0.0765052	2.41984	0.605479
ENSG00000273249	LL09NC01-251B2.3	0.175378	-1.99524	0.605479
ENSG00000225889	AC074289.1	-0.0756395	4.65746	0.605546
ENSG00000233554	B4GALT1-AS1	0.177482	-1.03583	0.606377
ENSG00000153046	CDYL	0.079649	5.8144	0.606392
ENSG00000211777	TRAV3	0.105639	1.4502	0.606392
ENSG00000235920	AC073109.2	-0.204363	-2.34613	0.606392
ENSG00000123201	GUCY1B2	0.318745	-2.19498	0.607084
ENSG00000198130	HIBCH	-0.0473863	4.74142	0.607084
ENSG00000204020	LIPN	-0.116506	4.05345	0.607084
ENSG00000236439	RP11-175B9.3	0.256538	-1.54044	0.607084
ENSG00000011275	RNF216	0.0316053	6.63081	0.607395
ENSG00000075413	MARK3	0.0483574	7.57328	0.607395
ENSG00000079974	RABL2B	0.0637798	2.36397	0.607395
ENSG00000145741	BTF3	0.0672457	7.23566	0.607395
ENSG00000163251	FZD5	0.106553	2.00277	0.607395
ENSG00000166340	TPP1	0.0773624	5.51397	0.607395
ENSG00000169583	CLIC3	-0.145826	0.310717	0.607395
ENSG00000198189	HSD17B11	-0.0423409	7.68024	0.607395
ENSG00000012983	MAP4K5	0.0448113	5.95646	0.607616
ENSG00000066926	FECH	0.16376	7.52155	0.607616
ENSG00000072506	HSD17B10	-0.0516354	4.18623	0.607616
ENSG00000102760	RGCC	0.0851466	4.99723	0.607616
ENSG00000107643	MAPK8	-0.0362093	5.5886	0.607616
ENSG00000134463	ECHDC3	-0.120983	1.84384	0.607616
ENSG00000137757	CASP5	0.120356	3.83296	0.607616
ENSG00000137842	TMEM62	-0.0400682	4.59323	0.607616
ENSG00000138069	RAB1A	-0.0305785	6.24114	0.607616
ENSG00000160703	NLRX1	-0.0670544	3.95038	0.607616
ENSG00000161944	ASGR2	0.0982348	1.97679	0.607616
ENSG00000163755	HPS3	-0.0277724	6.31027	0.607616
ENSG00000173914	RBM4B	-0.0337657	3.98293	0.607616
ENSG00000183850	ZNF730	0.201373	-2.14661	0.607616
ENSG00000184221	OLIG1	0.0871096	1.95253	0.607616
ENSG00000197256	KANK2	0.19273	2.83128	0.607616
ENSG00000231981	RPL7L1P12	0.129255	-0.0113319	0.607616
ENSG00000233974	RP11-823P9.3	0.200325	-2.55651	0.607616
ENSG00000236352	AC005220.3	0.175015	-0.764371	0.607616
ENSG00000254719	RP11-351I24.3	0.226962	-1.29263	0.607616
ENSG00000215788	TNFRSF25	0.0710306	4.82634	0.608171
ENSG00000149534	MS4A2	-0.23593	1.97649	0.608496
ENSG00000241634	RP11-381E24.1	-0.142562	-0.288189	0.608496
ENSG00000196118	C16orf93	-0.0813827	1.50705	0.610039
ENSG00000203814	HIST2H2BF	-0.0557937	5.90382	0.610039
ENSG00000242272	AK2P2	-0.183164	-2.0326	0.610039
ENSG00000138615	CILP	-0.132238	-0.0182609	0.610444
ENSG00000154305	MIA3	-0.0257355	6.86463	0.610444
ENSG00000159055	MIS18A	0.0968993	0.887132	0.610444
ENSG00000207092	Y_RNA	-0.156536	-0.266841	0.610444
ENSG00000215223	CYP51A1P3	0.190481	-1.68204	0.610444
ENSG00000243836	WDR86-AS1	0.11476	2.19996	0.610646
ENSG00000179456	ZBTB18	-0.0310721	6.84667	0.611661
ENSG00000114742	WDR48	-0.0278096	6.41096	0.611765
ENSG00000151150	ANK3	0.0786971	6.35908	0.611765
ENSG00000271631	RP11-408O19.5	0.166008	-0.902533	0.611765
ENSG00000256590	TRDV3	0.232669	-1.50713	0.61257
ENSG00000090266	NDUFB2	0.0653501	4.01762	0.612697
ENSG00000165568	AKR1E2	0.151328	2.6663	0.616006
ENSG00000185608	MRPL40	0.0904	2.4072	0.616006
ENSG00000223621	AK4P4	0.191896	-1.31152	0.616365
ENSG00000278023	RDM1	-0.189688	-1.79697	0.616365
ENSG00000065357	DGKA	0.058989	7.09542	0.616558
ENSG00000122483	CCDC18	0.0661211	4.26987	0.616558
ENSG00000160185	UBASH3A	0.0591912	5.26903	0.616558
ENSG00000170915	PAQR8	0.0455973	4.91473	0.616558
ENSG00000244398	RP11-466H18.1	0.281906	-0.473519	0.616558
ENSG00000255115	RP11-91P24.3	0.142775	-0.445468	0.616558
ENSG00000267481	CTC-559E9.5	-0.0531781	3.17899	0.616558
ENSG00000120896	SORBS3	0.081102	1.69003	0.617081
ENSG00000254718	CTD-2184C24.2	-0.156143	-0.938754	0.617975
ENSG00000279518	AC083843.4	-0.135642	-0.160705	0.619336
ENSG00000151093	OXSM	0.0630715	2.66085	0.619398
ENSG00000153234	NR4A2	-0.108679	0.679594	0.619398
ENSG00000196683	TOMM7	0.125702	4.58135	0.619398
ENSG00000197635	DPP4	0.0721927	5.43844	0.619398
ENSG00000273542	HIST1H4K	-0.134475	-0.015445	0.619992
ENSG00000099250	NRP1	-0.136433	1.71302	0.6205
ENSG00000213860	RPL21P75	0.202483	-2.39868	0.6205
ENSG00000272263	RP11-767C1.2	0.169325	-1.08621	0.6205
ENSG00000006704	GTF2IRD1	0.183652	-2.28479	0.622484
ENSG00000163162	RNF149	-0.034985	9.23107	0.622484
ENSG00000269887	RP11-477H21.2	0.20326	-0.623857	0.622484
ENSG00000219085	NPM1P37	-0.0720944	3.17717	0.623466
ENSG00000138621	PPCDC	-0.0601754	4.98683	0.623588
ENSG00000171155	C1GALT1C1	0.060378	4.06505	0.623588
ENSG00000034677	RNF19A	-0.0305292	7.3324	0.623607
ENSG00000153207	AHCTF1	-0.0408232	7.87327	0.623607
ENSG00000213903	LTB4R	-0.0525395	5.838	0.623607
ENSG00000004846	ABCB5	0.21031	-2.25239	0.625839
ENSG00000109689	STIM2	-0.0318938	5.79583	0.625839
ENSG00000139517	LNX2	0.0457548	4.40501	0.625839
ENSG00000147324	MFHAS1	0.0577608	5.49965	0.625839
ENSG00000148180	GSN	-0.0716979	6.72213	0.625839
ENSG00000207642	MIR571	0.145232	-0.507521	0.625839
ENSG00000224977	RP11-160H22.3	-0.193388	-1.82348	0.625839
ENSG00000236603	RANP1	0.191161	-0.869644	0.625839
ENSG00000279243	CMB9-22P13.2	0.201041	-1.73497	0.625839
ENSG00000216316	RP3-354N19.3	-0.0972789	1.2892	0.62777
ENSG00000234981	RP11-534L20.4	0.1822	-1.80708	0.62777
ENSG00000270562	RP11-154H23.3	-0.0661335	3.6316	0.62777
ENSG00000100285	NEFH	-0.163794	-0.415277	0.628046
ENSG00000163798	SLC4A1AP	-0.0317992	5.18304	0.628046
ENSG00000245954	RP11-18H21.1	0.150589	2.44389	0.628046
ENSG00000039068	CDH1	0.146225	2.7931	0.628131
ENSG00000131944	C19orf40	-0.0958999	1.50941	0.628131
ENSG00000139514	SLC7A1	0.0683271	4.11049	0.628131
ENSG00000148488	ST8SIA6	-0.0958936	1.87376	0.628131
ENSG00000151445	VIPAS39	-0.0247122	5.20086	0.628131
ENSG00000162413	KLHL21	-0.0471385	6.45441	0.628131
ENSG00000168036	CTNNB1	-0.0225567	8.04029	0.628131
ENSG00000168818	STX18	0.0312037	4.45785	0.628131
ENSG00000183856	IQGAP3	-0.193304	-1.73719	0.628131
ENSG00000188206	HNRNPU-AS1	-0.0465333	6.70923	0.628131
ENSG00000236801	RPL24P8	0.229901	-1.30679	0.628131
ENSG00000237738	RNF216-IT1	0.188742	-1.15427	0.628131
ENSG00000248092	NNT-AS1	0.0562115	2.74692	0.628131
ENSG00000274997	HIST1H2AH	-0.119911	2.09794	0.628131
ENSG00000230082	PRRT3-AS1	0.173974	-1.15398	0.628325
ENSG00000165972	CCDC38	-0.182745	-2.32277	0.62967
ENSG00000271020	RP11-10C24.1	-0.187883	-1.85351	0.62967
ENSG00000026508	CD44	0.0441655	8.53466	0.630756
ENSG00000080839	RBL1	0.040605	5.14765	0.630756
ENSG00000086589	RBM22	-0.0223251	5.50892	0.630756
ENSG00000096384	HSP90AB1	0.0429869	7.68084	0.630756
ENSG00000103248	MTHFSD	-0.0314867	4.6218	0.630756
ENSG00000107551	RASSF4	0.0459455	5.99973	0.630756
ENSG00000111737	RAB35	-0.0384826	5.40734	0.630756
ENSG00000111850	SMIM8	-0.0529683	4.20823	0.630756
ENSG00000112218	GPR63	0.14766	0.23607	0.630756
ENSG00000117791	2021-03-02	-0.177677	-0.910956	0.630756
ENSG00000134644	PUM1	0.0285952	6.8195	0.630756
ENSG00000137073	UBAP2	0.0694939	5.75646	0.630756
ENSG00000140396	NCOA2	-0.0313927	8.32379	0.630756
ENSG00000140403	DNAJA4	0.110256	5.17254	0.630756
ENSG00000146963	C7orf55-LUC7L2	-0.0476395	5.22457	0.630756
ENSG00000156110	ADK	0.0524974	4.79009	0.630756
ENSG00000163931	TKT	-0.0538644	8.87574	0.630756
ENSG00000164615	CAMLG	0.0523997	4.31384	0.630756
ENSG00000167182	SP2	0.104437	1.21425	0.630756
ENSG00000174977	AC026271.5	0.177151	-0.0271002	0.630756
ENSG00000175931	UBE2O	0.138129	5.52575	0.630756
ENSG00000178695	KCTD12	0.043042	7.02425	0.630756
ENSG00000178814	OPLAH	0.112984	1.70735	0.630756
ENSG00000182774	RPS17	0.140902	6.47934	0.630756
ENSG00000182827	ACBD3	-0.0336788	5.66924	0.630756
ENSG00000188385	JAKMIP3	0.153626	-0.325971	0.630756
ENSG00000188559	RALGAPA2	-0.0457577	7.79749	0.630756
ENSG00000196083	IL1RAP	-0.06627	7.22705	0.630756
ENSG00000204257	HLA-DMA	-0.0473711	5.89617	0.630756
ENSG00000211678	IGLJ3	0.205169	-2.15019	0.630756
ENSG00000228702	RP11-671E7.1	-0.184578	-1.38804	0.630756
ENSG00000228903	RASA4CP	-0.086714	1.42599	0.630756
ENSG00000229152	ANKRD10-IT1	-0.0565599	3.89214	0.630756
ENSG00000231105	RP5-1071N3.1	0.0998501	0.502623	0.630756
ENSG00000233485	RP3-467K16.2	-0.211152	-2.40841	0.630756
ENSG00000250138	RP11-848G14.5	0.217869	0.41503	0.630756
ENSG00000263968	RN7SL381P	0.128919	0.283636	0.630756
ENSG00000269743	SLC25A53	-0.0449075	3.99711	0.630756
ENSG00000272562	RP11-396C23.4	-0.0709623	2.07889	0.630756
ENSG00000274020	LINC01138	-0.0449443	5.2228	0.630756
ENSG00000278311	GGNBP2	-0.0287946	6.77463	0.630756
ENSG00000278396	RP11-120E11.2	0.183729	-1.91073	0.630756
ENSG00000008130	NADK	-0.0547932	7.84284	0.630918
ENSG00000024862	CCDC28A	-0.038702	5.04911	0.630918
ENSG00000060762	MPC1	-0.0426154	4.09021	0.630918
ENSG00000108946	PRKAR1A	-0.0363925	8.5348	0.630918
ENSG00000111786	SRSF9	-0.0246499	6.5342	0.630918
ENSG00000144048	DUSP11	-0.0281448	5.27273	0.630918
ENSG00000163399	ATP1A1	0.0371258	7.24191	0.630918
ENSG00000169019	COMMD8	0.123813	2.81723	0.630918
ENSG00000181852	RNF41	-0.0269363	6.3318	0.630918
ENSG00000235776	AC000089.3	0.166798	-0.109259	0.630918
ENSG00000239291	RP5-867C24.1	0.0924931	1.02473	0.630918
ENSG00000240382	IGKV1-17	-0.227194	-0.294141	0.630918
ENSG00000070915	SLC12A3	-0.176507	-0.8361	0.631149
ENSG00000074603	DPP8	-0.0233646	7.08898	0.631149
ENSG00000110046	ATG2A	-0.0841248	4.89671	0.631149
ENSG00000163435	ELF3	0.148286	-0.661693	0.631149
ENSG00000180539	C9orf139	-0.0650037	3.61835	0.631149
ENSG00000181409	AATK	-0.0947207	4.6446	0.631149
ENSG00000184357	HIST1H1B	-0.110133	4.42246	0.631149
ENSG00000266783	RP11-715F3.2	-0.14849	-0.49804	0.631149
ENSG00000279039	CTC-260E6.3	0.187115	-1.97647	0.631149
ENSG00000010318	PHF7	0.0558363	2.56455	0.631409
ENSG00000100429	HDAC10	0.0890595	0.871048	0.631573
ENSG00000134698	AGO4	-0.0384523	8.32131	0.631573
ENSG00000137054	POLR1E	0.0440841	4.07053	0.631573
ENSG00000153922	CHD1	-0.0353239	7.8996	0.631573
ENSG00000158710	TAGLN2	-0.0651738	8.73864	0.631573
ENSG00000160602	NEK8	0.0758083	1.51135	0.631573
ENSG00000168906	MAT2A	0.0296622	6.50377	0.631573
ENSG00000179832	MROH1	0.0653585	3.93051	0.631573
ENSG00000184898	RBM43	-0.0576293	3.99862	0.631573
ENSG00000184983	NDUFA6	0.0775256	3.581	0.631573
ENSG00000185436	IFNLR1	-0.0884689	2.37825	0.631573
ENSG00000187091	PLCD1	-0.0535951	3.83379	0.631573
ENSG00000196436	NPIPB15	0.246697	-1.05013	0.631573
ENSG00000249673	NOP14-AS1	-0.0434134	4.2417	0.631573
ENSG00000250569	NTAN1P2	-0.0624295	2.13704	0.631573
ENSG00000267637	RP11-619I22.1	-0.164118	-0.646723	0.631573
ENSG00000277411	5S_rRNA	-0.176548	-2.24693	0.631573
ENSG00000278448	CTD-2240J17.3	0.181616	-1.53536	0.631573
ENSG00000196656	AC004057.1	0.229308	-1.34047	0.632253
ENSG00000243147	MRPL33	0.0495345	3.77974	0.632253
ENSG00000151014	CCRN4L	-0.0857598	1.37547	0.632879
ENSG00000228395	RP11-216B9.6	0.116044	0.0392028	0.633636
ENSG00000254528	RP11-728F11.4	0.181564	-0.17763	0.63408
ENSG00000185710	SMG1P4	-0.213	0.989875	0.634325
ENSG00000029153	ARNTL2	0.112856	0.964464	0.634512
ENSG00000136634	IL10	0.188694	-1.34949	0.634512
ENSG00000149656	LINC00266-1	-0.17956	-1.55339	0.634512
ENSG00000164548	TRA2A	-0.028525	6.74741	0.634512
ENSG00000171940	ZNF217	-0.0259366	8.64494	0.634512
ENSG00000277558	RP3-468O1.6	-0.100669	0.739237	0.634512
ENSG00000169951	ZNF764	0.0508833	2.48114	0.634814
ENSG00000102921	N4BP1	-0.0349509	7.03218	0.63514
ENSG00000107018	RLN1	0.125743	0.18368	0.63514
ENSG00000132024	CC2D1A	0.0756167	1.82676	0.63514
ENSG00000162631	NTNG1	-0.20763	-1.34757	0.63514
ENSG00000197632	SERPINB2	0.129224	0.969313	0.63514
ENSG00000265801	RP11-720N19.2	0.160508	-0.60286	0.63514
ENSG00000103355	PRSS33	0.149743	0.831196	0.635794
ENSG00000132514	CLEC10A	-0.0926823	3.47024	0.635794
ENSG00000277369	RP11-486I11.2	-0.0673132	2.17205	0.637027
ENSG00000261270	RP11-325K4.3	-0.0687725	1.94904	0.637124
ENSG00000072071	LPHN1	0.0872696	1.86188	0.637543
ENSG00000100056	DGCR14	-0.0453454	4.17687	0.637543
ENSG00000126522	ASL	-0.0640314	2.86986	0.637543
ENSG00000143252	SDHC	-0.0267939	5.89083	0.637543
ENSG00000148719	DNAJB12	-0.0375153	5.748	0.637543
ENSG00000163808	KIF15	0.117203	2.07138	0.637543
ENSG00000170468	C14orf169	0.0399325	4.2315	0.637543
ENSG00000173114	LRRN3	-0.156853	4.07204	0.637543
ENSG00000244703	CD46P1	0.153956	0.666636	0.637543
ENSG00000271382	RP11-1060G2.2	0.185971	-2.31948	0.637543
ENSG00000198918	RPL39	0.162212	4.90647	0.638896
ENSG00000229715	EEF1DP3	0.0972375	3.11688	0.638896
ENSG00000020181	GPR124	0.107212	0.972582	0.639928
ENSG00000067601	PMS2P4	-0.0764109	1.21427	0.639928
ENSG00000102081	FMR1	-0.0345065	6.62455	0.639928
ENSG00000102271	KLHL4	-0.231623	-1.756	0.639928
ENSG00000111144	LTA4H	0.0615727	8.29978	0.639928
ENSG00000114270	COL7A1	-0.11833	0.293528	0.639928
ENSG00000115524	SF3B1	-0.0475716	10.0151	0.639928
ENSG00000116266	STXBP3	-0.0397823	6.62648	0.639928
ENSG00000119986	AVPI1	-0.131855	0.0614582	0.639928
ENSG00000120129	DUSP1	-0.0616553	7.84636	0.639928
ENSG00000123384	LRP1	0.108812	6.10027	0.639928
ENSG00000125498	KIR2DL1	-0.220238	-0.719003	0.639928
ENSG00000130363	RSPH3	-0.0593492	4.11553	0.639928
ENSG00000137098	SPAG8	-0.0935753	0.683954	0.639928
ENSG00000149922	TBX6	0.161995	-1.47189	0.639928
ENSG00000154165	GPR15	-0.138151	4.32812	0.639928
ENSG00000156482	RPL30	0.101049	8.40277	0.639928
ENSG00000162543	UBXN10	-0.112238	2.34287	0.639928
ENSG00000163864	NMNAT3	0.0882683	1.79427	0.639928
ENSG00000176208	ATAD5	0.0563243	3.61533	0.639928
ENSG00000182518	FAM104B	0.0881372	1.97507	0.639928
ENSG00000183723	CMTM4	0.053432	3.52087	0.639928
ENSG00000198237	RP11-98J23.2	0.141707	-0.528287	0.639928
ENSG00000198911	SREBF2	0.0591752	4.82745	0.639928
ENSG00000214226	C17orf67	0.0651672	2.0816	0.639928
ENSG00000225830	ERCC6	-0.0365409	5.72475	0.639928
ENSG00000228794	LINC01128	0.0505093	4.19839	0.639928
ENSG00000232578	CTC-303L1.1	0.186728	-2.45023	0.639928
ENSG00000234773	CTD-2666L21.1	0.108175	0.484966	0.639928
ENSG00000249684	RP11-423H2.3	0.118906	0.775881	0.639928
ENSG00000258831	RP11-76E17.4	-0.173682	0.512195	0.639928
ENSG00000260947	RP11-384P7.7	-0.20702	-0.0753042	0.639928
ENSG00000280270	RP11-560F18.1	0.232761	-1.60422	0.639928
ENSG00000240429	LRRFIP1P1	0.092923	1.46323	0.640657
ENSG00000249042	CTD-2015H6.3	0.172239	-1.33675	0.641219
ENSG00000070159	PTPN3	-0.196516	-2.16496	0.64205
ENSG00000114554	PLXNA1	0.0661609	2.62411	0.64205
ENSG00000119471	HSDL2	-0.0467782	6.08654	0.64205
ENSG00000163297	ANTXR2	-0.0309486	7.83572	0.64205
ENSG00000272031	ANKRD34A	0.101729	0.458145	0.642568
ENSG00000240764	PCDHGC5	-0.19145	-2.10325	0.642936
ENSG00000103342	GSPT1	0.114353	9.00139	0.643163
ENSG00000166169	POLL	0.0859862	5.07897	0.643163
ENSG00000200156	RNU5B-1	-0.238679	1.82979	0.643163
ENSG00000204528	PSORS1C3	0.204268	-1.94198	0.643163
ENSG00000229222	KRT18P4	-0.074435	1.41494	0.643163
ENSG00000134215	VAV3	-0.0345826	6.72988	0.644419
ENSG00000143344	RGL1	0.0735267	2.24054	0.644419
ENSG00000271011	RP11-171I2.5	-0.0798153	2.16254	0.644419
ENSG00000258473	RP11-7F17.4	-0.194376	-2.05883	0.6445
ENSG00000004939	SLC4A1	0.168728	8.98311	0.644695
ENSG00000030110	BAK1	-0.059118	4.55413	0.644695
ENSG00000163221	S100A12	0.117038	5.88465	0.644771
ENSG00000173193	PARP14	-0.0798556	9.39719	0.644771
ENSG00000125691	RPL23	0.147406	6.47993	0.645365
ENSG00000123609	NMI	-0.048401	6.14279	0.6456
ENSG00000127824	TUBA4A	-0.054452	6.93227	0.6456
ENSG00000145365	TIFA	0.0584433	4.7843	0.6456
ENSG00000187775	DNAH17	0.214513	-1.02318	0.6456
ENSG00000260997	RP4-647J21.1	0.105613	1.80625	0.6456
ENSG00000111885	MAN1A1	-0.0533035	6.97293	0.645723
ENSG00000173542	MOB1B	0.0545183	5.34748	0.645723
ENSG00000185515	BRCC3	-0.0347321	4.43073	0.645723
ENSG00000214185	XPOTP1	0.163292	-2.20752	0.645723
ENSG00000228393	LINC01004	-0.0604993	1.90609	0.645723
ENSG00000240509	RPL34P18	0.218842	-2.49007	0.645723
ENSG00000269934	RP5-1139B12.3	0.16998	-2.32272	0.646282
ENSG00000139266	2021-03-09	0.0469237	3.22507	0.647218
ENSG00000163681	SLMAP	-0.0226547	6.79805	0.647218
ENSG00000034713	GABARAPL2	0.0801374	6.57131	0.6483
ENSG00000078403	MLLT10	0.030083	5.83334	0.6483
ENSG00000184860	SDR42E1	0.0637071	3.69673	0.6483
ENSG00000273064	RP11-474G23.3	-0.0775049	1.36323	0.6483
ENSG00000166130	IKBIP	-0.0625978	5.2274	0.648642
ENSG00000182944	EWSR1	-0.0217438	8.0083	0.649233
ENSG00000103035	PSMD7	-0.0311569	5.86544	0.649768
ENSG00000160307	S100B	-0.268106	0.797378	0.649768
ENSG00000261786	RP4-555D20.2	-0.186774	-2.29713	0.649768
ENSG00000278974	RP11-756P10.6	-0.187969	-2.08726	0.649768
ENSG00000113240	CLK4	-0.042586	6.92341	0.649893
ENSG00000132205	EMILIN2	0.044328	6.42741	0.649893
ENSG00000262227	RP5-1050D4.5	0.114799	-0.193198	0.649893
ENSG00000264204	AGAP7P	-0.142648	1.29508	0.649893
ENSG00000111186	WNT5B	-0.151071	-0.270849	0.650063
ENSG00000162923	WDR26	0.0535517	8.24417	0.650702
ENSG00000114450	GNB4	-0.0435776	6.61933	0.653587
ENSG00000145901	TNIP1	0.0509598	6.94472	0.654134
ENSG00000153157	SYCP2L	-0.258712	-0.665308	0.654134
ENSG00000237668	RPS15AP38	0.237604	-2.13131	0.654134
ENSG00000003756	RBM5	-0.0257651	8.45205	0.655241
ENSG00000155368	DBI	0.0763037	4.05385	0.655241
ENSG00000169087	HSPBAP1	-0.0472158	5.70693	0.655241
ENSG00000184060	ADAP2	0.0491478	3.69463	0.655241
ENSG00000243660	ZNF487	-0.0544689	3.88092	0.655241
ENSG00000275221	HIST1H2AK	-0.0838533	2.30358	0.655241
ENSG00000105778	AVL9	-0.0221188	7.21857	0.655291
ENSG00000105851	PIK3CG	-0.0278657	7.63373	0.655291
ENSG00000127328	RAB3IP	0.0480821	4.82707	0.655291
ENSG00000128789	PSMG2	-0.0328751	5.05372	0.655291
ENSG00000130560	UBAC1	0.049193	4.95293	0.655291
ENSG00000154620	TMSB4Y	-0.101106	-0.583057	0.655291
ENSG00000177868	CCDC23	0.084915	3.85414	0.655291
ENSG00000233954	UQCRHL	0.111445	1.21742	0.655291
ENSG00000261324	RP11-174G6.5	-0.0522397	4.59955	0.655291
ENSG00000271109	CTC-523E23.11	0.0696266	2.27596	0.655291
ENSG00000088986	DYNLL1	0.0488368	5.36227	0.655341
ENSG00000101624	CEP76	0.0478699	3.02631	0.655341
ENSG00000103599	IQCH	0.126091	-0.220681	0.655341
ENSG00000128594	LRRC4	-0.0646686	5.83399	0.655341
ENSG00000160446	ZDHHC12	-0.0711084	2.7167	0.655341
ENSG00000162654	GBP4	-0.0791625	6.65675	0.655341
ENSG00000173230	GOLGB1	-0.0324728	7.84078	0.655341
ENSG00000187838	TMEM256-PLSCR3	0.155504	-1.16154	0.655341
ENSG00000197381	ADARB1	0.059509	4.92905	0.655341
ENSG00000199347	RNU5E-1	-0.214053	0.081756	0.655341
ENSG00000271270	TMCC1-AS1	-0.0720416	1.74763	0.655341
ENSG00000271918	CTD-2287O16.5	0.0802719	1.19816	0.655341
ENSG00000116679	IVNS1ABP	-0.0351071	8.15489	0.655706
ENSG00000065491	TBC1D22B	0.0936783	5.02197	0.656304
ENSG00000104499	GML	-0.185174	-1.21793	0.656304
ENSG00000112294	ALDH5A1	0.107959	4.87228	0.656304
ENSG00000117425	PTCH2	0.169768	-1.72445	0.656304
ENSG00000123983	ACSL3	-0.0358306	5.66673	0.656304
ENSG00000131067	GGT7	0.0617248	2.77914	0.656304
ENSG00000132842	AP3B1	-0.0263333	7.3085	0.656304
ENSG00000135723	FHOD1	0.0597058	3.40988	0.656304
ENSG00000140678	ITGAX	0.0756053	7.9606	0.656304
ENSG00000147437	GNRH1	-0.0582771	2.44717	0.656304
ENSG00000165891	E2F7	-0.153332	-0.528481	0.656304
ENSG00000177352	CCDC71	-0.0463035	4.0962	0.656304
ENSG00000182197	EXT1	-0.0480459	4.84336	0.656304
ENSG00000197562	RAB40C	-0.0552784	3.42474	0.656304
ENSG00000233108	AC006042.7	-0.171095	-1.97767	0.656304
ENSG00000253043	RNU7-181P	-0.131689	-0.159494	0.656304
ENSG00000256269	HMBS	0.110812	3.71063	0.656304
ENSG00000259392	RP11-758N13.3	-0.230943	-1.73888	0.656304
ENSG00000264419	MIR548AC	-0.170498	-1.57639	0.656304
ENSG00000267750	RUNDC3A-AS1	0.181951	-0.31104	0.656304
ENSG00000277406	CH17-385C13.2	-0.0936642	1.98341	0.656304
ENSG00000278376	RP11-158I9.8	0.0868282	1.21235	0.656304
ENSG00000281357	ARRDC3-AS1	-0.0589779	2.27638	0.656304
ENSG00000107560	RAB11FIP2	-0.0356574	5.7595	0.656401
ENSG00000251002	AE000661.37	-0.0894409	2.11521	0.656401
ENSG00000272030	RP1-178F15.4	-0.145798	-0.754459	0.656696
ENSG00000280240	AL049794.1	0.160151	-0.87913	0.65739
ENSG00000199883	RN7SKP90	-0.167085	-2.41116	0.658373
ENSG00000227008	RP3-417G15.1	0.227131	-1.86481	0.658373
ENSG00000272172	RP13-582O9.7	0.171745	-2.28368	0.658373
ENSG00000273749	CYFIP1	0.0510214	5.56314	0.658373
ENSG00000109381	ELF2	-0.0240146	7.32846	0.659316
ENSG00000166965	RCCD1	0.0667268	1.78471	0.659316
ENSG00000222297	RNU6-1156P	-0.171004	-2.23871	0.659316
ENSG00000135924	DNAJB2	0.0985986	6.35697	0.661222
ENSG00000277463	CTD-3035K23.6	-0.163199	-1.3865	0.661426
ENSG00000050165	DKK3	-0.192521	-0.524941	0.661697
ENSG00000058272	PPP1R12A	-0.0313019	8.22975	0.661697
ENSG00000076356	PLXNA2	-0.0829607	3.50672	0.661697
ENSG00000076770	MBNL3	0.116537	8.68422	0.661697
ENSG00000099953	MMP11	-0.130698	-0.225208	0.661697
ENSG00000107789	MINPP1	0.0644804	3.52743	0.661697
ENSG00000114166	KAT2B	0.0628618	8.05696	0.661697
ENSG00000120875	DUSP4	-0.116339	0.764008	0.661697
ENSG00000122733	KIAA1045	-0.197858	-0.572636	0.661697
ENSG00000123080	CDKN2C	0.0856764	1.76275	0.661697
ENSG00000134461	ANKRD16	0.0610264	1.73868	0.661697
ENSG00000137941	TTLL7	-0.127034	1.01712	0.661697
ENSG00000141456	PELP1	0.0639454	2.4725	0.661697
ENSG00000143368	SF3B4	0.0555434	2.71024	0.661697
ENSG00000144468	RHBDD1	0.0612058	6.11058	0.661697
ENSG00000144579	CTDSP1	-0.046207	6.2787	0.661697
ENSG00000162819	BROX	-0.0318424	6.73495	0.661697
ENSG00000163904	SENP2	-0.0277367	5.34171	0.661697
ENSG00000174485	DENND4A	0.0395257	8.23043	0.661697
ENSG00000184277	TM2D3	-0.0249826	5.77317	0.661697
ENSG00000196739	COL27A1	-0.18073	-2.4411	0.661697
ENSG00000204267	TAP2	-0.0576652	6.13127	0.661697
ENSG00000204525	HLA-C	-0.0643757	10.7619	0.661697
ENSG00000211813	TRAV34	0.183523	-1.5752	0.661697
ENSG00000214787	MS4A4E	-0.074033	3.16575	0.661697
ENSG00000223705	NSUN5P1	-0.0617207	3.39236	0.661697
ENSG00000232187	FTH1P7	0.179422	-1.97889	0.661697
ENSG00000239998	LILRA2	-0.0550346	6.5684	0.661697
ENSG00000261888	AC144831.1	-0.131582	-0.344316	0.661697
ENSG00000264548	RP13-516M14.2	-0.14926	-0.740497	0.661697
ENSG00000265996	MIR3671	-0.07183	2.37727	0.661697
ENSG00000268659	RP11-310J24.3	0.196366	-0.249069	0.661697
ENSG00000080824	HSP90AA1	0.0801101	7.31071	0.661708
ENSG00000168216	LMBRD1	-0.0442856	5.98746	0.662015
ENSG00000233338	TLR8-AS1	-0.216385	-1.66816	0.662015
ENSG00000080371	RAB21	-0.0295959	6.65385	0.662053
ENSG00000188582	PAQR9	0.219776	-0.677819	0.662053
ENSG00000245532	NEAT1	0.139825	10.7445	0.662053
ENSG00000258092	RP4-816N1.7	0.150629	-0.957033	0.662053
ENSG00000004660	CAMKK1	-0.0691295	3.78398	0.663017
ENSG00000025434	NR1H3	-0.0746939	1.51141	0.663017
ENSG00000059588	TARBP1	-0.0398991	5.63022	0.663017
ENSG00000071564	TCF3	0.0722371	4.5469	0.663017
ENSG00000072134	EPN2	-0.0643834	3.18971	0.663017
ENSG00000079308	TNS1	0.164572	7.66388	0.663017
ENSG00000095397	DFNB31	-0.132022	0.597947	0.663017
ENSG00000103274	NUBP1	-0.0363546	4.37288	0.663017
ENSG00000106976	DNM1	-0.157909	-0.708709	0.663017
ENSG00000110076	NRXN2	-0.179605	-1.69267	0.663017
ENSG00000111796	KLRB1	0.102806	4.53386	0.663017
ENSG00000120696	KBTBD7	-0.0500584	5.63585	0.663017
ENSG00000121964	GTDC1	-0.036806	5.70369	0.663017
ENSG00000122026	RPL21	0.131794	6.65808	0.663017
ENSG00000124541	RRP36	-0.0288049	4.84706	0.663017
ENSG00000125898	FAM110A	-0.0613377	3.2835	0.663017
ENSG00000126759	CFP	-0.0513492	7.31808	0.663017
ENSG00000129534	MIS18BP1	-0.0459943	6.67432	0.663017
ENSG00000130997	POLN	0.0865077	0.895768	0.663017
ENSG00000134198	TSPAN2	-0.0729314	5.52415	0.663017
ENSG00000135090	TAOK3	-0.0201162	7.43519	0.663017
ENSG00000135925	WNT10A	0.110961	0.728256	0.663017
ENSG00000136938	ANP32B	0.0776599	5.10858	0.663017
ENSG00000137166	FOXP4	0.12376	-0.0567078	0.663017
ENSG00000137601	NEK1	0.0482754	4.6091	0.663017
ENSG00000142208	AKT1	-0.0475543	7.03581	0.663017
ENSG00000142676	RPL11	0.103931	7.70806	0.663017
ENSG00000143162	CREG1	0.0804491	6.27815	0.663017
ENSG00000143207	RFWD2	-0.0286006	7.74864	0.663017
ENSG00000146674	IGFBP3	-0.105643	2.59312	0.663017
ENSG00000147168	IL2RG	0.0305044	7.02555	0.663017
ENSG00000147912	FBXO10	0.130863	-0.290482	0.663017
ENSG00000149798	CDC42EP2	-0.0750148	4.51817	0.663017
ENSG00000152229	PSTPIP2	-0.0519616	5.78872	0.663017
ENSG00000153317	ASAP1	0.0667804	6.89882	0.663017
ENSG00000158470	B4GALT5	-0.0543189	7.17301	0.663017
ENSG00000163806	SPDYA	-0.0744132	2.01081	0.663017
ENSG00000164168	TMEM184C	-0.0306088	5.50586	0.663017
ENSG00000168000	BSCL2	-0.0661398	1.51422	0.663017
ENSG00000174437	ATP2A2	0.0387422	6.25828	0.663017
ENSG00000178562	CD28	0.0612372	6.68534	0.663017
ENSG00000180211	RP1-278E11.3	0.211604	-2.17134	0.663017
ENSG00000183527	PSMG1	0.0535275	2.86594	0.663017
ENSG00000184575	XPOT	0.0331718	6.13876	0.663017
ENSG00000185019	UBOX5	-0.0520105	3.00901	0.663017
ENSG00000185483	ROR1	-0.215575	-1.8367	0.663017
ENSG00000186132	C2orf76	0.0707456	1.65748	0.663017
ENSG00000186314	PRELID2	0.0975005	1.19806	0.663017
ENSG00000188315	C3orf62	-0.0410963	5.49401	0.663017
ENSG00000196544	C17orf59	-0.0519134	3.84278	0.663017
ENSG00000197006	METTL9	0.0538557	7.08899	0.663017
ENSG00000197093	GAL3ST4	0.138416	-0.148506	0.663017
ENSG00000205927	OLIG2	0.126374	1.25238	0.663017
ENSG00000211445	GPX3	-0.159839	-0.097878	0.663017
ENSG00000211637	IGLV4-69	-0.183096	-2.29945	0.663017
ENSG00000217527	RPS16P5	-0.0732648	2.79901	0.663017
ENSG00000232022	FAAHP1	0.13091	0.912893	0.663017
ENSG00000233040	FAM204BP	0.110601	0.605174	0.663017
ENSG00000235330	RP11-165F24.2	0.157758	-0.938507	0.663017
ENSG00000237513	RP11-325F22.2	-0.0830099	1.78842	0.663017
ENSG00000249307	LINC01088	0.177942	-1.51576	0.663017
ENSG00000258741	RP11-386M24.4	0.162748	-0.714095	0.663017
ENSG00000264920	RP11-6N17.4	0.0828219	1.1347	0.663017
ENSG00000265287	RP11-192H23.6	-0.171452	-2.15921	0.663017
ENSG00000271734	RP1-111B22.3	-0.110722	0.110369	0.663017
ENSG00000271911	RP11-532F6.5	-0.174198	-1.72318	0.663017
ENSG00000272426	RP11-108M9.6	0.180167	-2.03284	0.663017
ENSG00000272650	RP11-571I18.4	-0.0807412	1.75146	0.663017
ENSG00000275457	RP1-198K11.5	0.13612	-0.480921	0.663017
ENSG00000039319	ZFYVE16	-0.0368426	7.41438	0.663323
ENSG00000057468	MSH4	0.12197	0.176669	0.663323
ENSG00000100181	TPTEP1	-0.131136	3.30332	0.663323
ENSG00000101150	TPD52L2	-0.0355235	7.0012	0.663323
ENSG00000112335	SNX3	0.0831955	7.2464	0.663323
ENSG00000119682	AREL1	-0.0287736	7.43903	0.663323
ENSG00000119950	MXI1	0.121883	8.07174	0.663323
ENSG00000125375	ATP5S	0.0428423	5.0187	0.663323
ENSG00000130844	ZNF331	0.041223	4.08082	0.663323
ENSG00000135709	KIAA0513	-0.0482284	7.11698	0.663323
ENSG00000151929	BAG3	0.0755435	1.8263	0.663323
ENSG00000163563	MNDA	-0.054373	10.4291	0.663323
ENSG00000168824	D4S234E	0.140394	2.02898	0.663323
ENSG00000187240	DYNC2H1	-0.0606505	4.03735	0.663323
ENSG00000219023	RP3-340B19.2	0.232523	-1.04602	0.663323
ENSG00000223513	ATP6V0E1P2	-0.170264	-2.17468	0.663323
ENSG00000225756	DBH-AS1	0.175012	-1.08514	0.663323
ENSG00000229117	RPL41	0.121781	5.57071	0.663323
ENSG00000235781	XXbac-BPG249D20.9	0.11854	0.0752213	0.663323
ENSG00000253230	LINC00599	-0.198243	-2.71759	0.663323
ENSG00000260261	RP11-480A16.1	-0.0751271	1.86799	0.663323
ENSG00000261614	CSDAP1	0.249223	-0.475872	0.663323
ENSG00000273294	C1QTNF3-AMACR	0.16539	-1.4814	0.663323
ENSG00000280069	CTD-2349P21.3	-0.0647402	2.17736	0.663323
ENSG00000120158	RCL1	0.0604476	4.45581	0.663338
ENSG00000140526	ABHD2	-0.0580163	8.4346	0.663338
ENSG00000156140	ADAMTS3	0.192304	-1.82479	0.663572
ENSG00000092208	GEMIN2	0.0785507	2.03922	0.66417
ENSG00000231419	LINC00689	0.236302	-1.51279	0.66417
ENSG00000242732	RGAG4	0.122902	0.129514	0.66417
ENSG00000085276	MECOM	-0.19297	-1.32377	0.665555
ENSG00000116809	ZBTB17	-0.044328	4.44155	0.665555
ENSG00000164713	BRI3	-0.0398079	5.59446	0.665555
ENSG00000142089	IFITM3	-0.184989	5.46719	0.665848
ENSG00000172349	IL16	-0.0359909	9.41574	0.665848
ENSG00000226976	COX6A1P2	0.166804	-0.0938054	0.665848
ENSG00000237264	FTH1P11	0.200779	-1.37317	0.665848
ENSG00000243679	RP11-274B21.3	0.117274	-0.150184	0.665848
ENSG00000278941	SMG6-IT1	0.166939	-1.20241	0.665848
ENSG00000176390	CRLF3	-0.0269944	7.46409	0.666119
ENSG00000185669	SNAI3	-0.0639144	3.14946	0.666119
ENSG00000217648	RP1-95L4.4	0.167313	-1.38132	0.66621
ENSG00000004799	PDK4	0.109186	5.2446	0.668195
ENSG00000008710	PKD1	0.0666721	3.99621	0.668195
ENSG00000011007	TCEB3	0.0244889	5.28314	0.668195
ENSG00000013364	MVP	-0.0484135	7.70574	0.668195
ENSG00000050393	MCUR1	0.0470824	3.8706	0.668195
ENSG00000053524	MCF2L2	0.0852392	3.01903	0.668195
ENSG00000055208	TAB2	0.025275	7.54015	0.668195
ENSG00000064199	SPA17	0.162005	-1.24228	0.668195
ENSG00000065882	TBC1D1	-0.0342478	7.49128	0.668195
ENSG00000067082	KLF6	-0.0270938	8.66617	0.668195
ENSG00000073464	CLCN4	-0.108223	3.98364	0.668195
ENSG00000074527	NTN4	0.179944	-0.23835	0.668195
ENSG00000079215	SLC1A3	0.13675	0.363758	0.668195
ENSG00000080815	PSEN1	-0.0239381	7.74443	0.668195
ENSG00000081059	TCF7	0.0752468	6.63472	0.668195
ENSG00000081189	MEF2C	-0.0487028	6.78688	0.668195
ENSG00000082146	STRADB	0.12683	9.27776	0.668195
ENSG00000082397	EPB41L3	-0.0586954	5.33426	0.668195
ENSG00000085514	PILRA	-0.056219	5.08085	0.668195
ENSG00000086758	HUWE1	0.0559317	7.63851	0.668195
ENSG00000087053	MTMR2	-0.0353741	4.27569	0.668195
ENSG00000087074	PPP1R15A	-0.049195	5.89639	0.668195
ENSG00000089693	MLF2	-0.0449333	5.4539	0.668195
ENSG00000094804	CDC6	-0.116172	0.42941	0.668195
ENSG00000095380	NANS	0.0376075	4.22726	0.668195
ENSG00000095485	CWF19L1	-0.0283635	5.62886	0.668195
ENSG00000099725	PRKY	0.0549747	1.59325	0.668195
ENSG00000099889	ARVCF	0.100798	1.39786	0.668195
ENSG00000100147	CCDC134	0.061207	2.19975	0.668195
ENSG00000100473	COCH	-0.137483	1.15394	0.668195
ENSG00000100632	ERH	0.0777702	4.13426	0.668195
ENSG00000101096	NFATC2	0.0545885	5.99635	0.668195
ENSG00000101367	MAPRE1	-0.0210891	6.876	0.668195
ENSG00000101473	ACOT8	-0.0294916	4.52728	0.668195
ENSG00000101474	APMAP	-0.0491061	7.53099	0.668195
ENSG00000102054	RBBP7	-0.0282977	5.89026	0.668195
ENSG00000102445	KIAA0226L	-0.0633146	6.51706	0.668195
ENSG00000103168	TAF1C	0.0614331	2.96153	0.668195
ENSG00000104432	IL7	-0.0981829	1.33562	0.668195
ENSG00000104974	LILRA1	-0.0550219	5.65087	0.668195
ENSG00000106565	TMEM176B	0.301363	2.854	0.668195
ENSG00000107738	C10orf54	-0.0486591	8.96106	0.668195
ENSG00000110344	UBE4A	-0.0198489	7.46822	0.668195
ENSG00000111647	UHRF1BP1L	-0.0338342	6.95262	0.668195
ENSG00000111652	COPS7A	-0.0309075	4.39788	0.668195
ENSG00000111666	CHPT1	0.0844886	6.02838	0.668195
ENSG00000111731	C2CD5	-0.0307077	6.54362	0.668195
ENSG00000112992	NNT	0.0250433	6.43336	0.668195
ENSG00000113790	EHHADH	0.0878201	1.29807	0.668195
ENSG00000114209	PDCD10	0.0548304	5.58048	0.668195
ENSG00000114268	PFKFB4	-0.0509169	6.35063	0.668195
ENSG00000114942	EEF1B2	0.122259	5.57269	0.668195
ENSG00000115325	DOK1	-0.0448212	5.05574	0.668195
ENSG00000116922	C1orf109	0.0402842	3.4404	0.668195
ENSG00000117228	GBP1	-0.100866	7.42574	0.668195
ENSG00000118046	STK11	0.0767028	6.31011	0.668195
ENSG00000118200	CAMSAP2	0.0675288	3.20478	0.668195
ENSG00000118260	CREB1	-0.0298372	7.62645	0.668195
ENSG00000119013	NDUFB3	0.0980895	2.81602	0.668195
ENSG00000120694	HSPH1	0.0504262	5.88479	0.668195
ENSG00000121552	CSTA	0.102234	3.97845	0.668195
ENSG00000122203	KIAA1191	0.0387268	5.59203	0.668195
ENSG00000122707	RECK	0.0374711	3.72061	0.668195
ENSG00000123473	STIL	0.118869	5.39245	0.668195
ENSG00000124019	FAM124B	-0.0748884	1.6928	0.668195
ENSG00000124098	FAM210B	0.133534	8.28839	0.668195
ENSG00000124302	CHST8	-0.177202	-2.3588	0.668195
ENSG00000125505	MBOAT7	-0.0603327	6.64961	0.668195
ENSG00000125772	GPCPD1	-0.0455869	8.4323	0.668195
ENSG00000127578	WFIKKN1	0.146645	-1.33509	0.668195
ENSG00000128989	ARPP19	-0.0287762	7.29126	0.668195
ENSG00000130706	ADRM1	-0.0482106	4.4049	0.668195
ENSG00000130772	MED18	-0.0381947	4.40539	0.668195
ENSG00000130827	PLXNA3	0.0748656	3.33479	0.668195
ENSG00000131398	KCNC3	0.116518	0.0169145	0.668195
ENSG00000131848	ZSCAN5A	0.0523037	2.59919	0.668195
ENSG00000132906	CASP9	-0.0477069	3.98794	0.668195
ENSG00000132964	CDK8	0.0463077	4.01205	0.668195
ENSG00000132972	RNF17	-0.266907	-2.68863	0.668195
ENSG00000134330	IAH1	0.0336539	4.67583	0.668195
ENSG00000134697	GNL2	0.0341964	4.9596	0.668195
ENSG00000134716	CYP2J2	0.160443	-0.914122	0.668195
ENSG00000135451	TROAP	0.138368	1.8868	0.668195
ENSG00000135722	FBXL8	0.0665285	1.72593	0.668195
ENSG00000136436	CALCOCO2	-0.0291349	7.03251	0.668195
ENSG00000136868	SLC31A1	-0.0446777	5.01183	0.668195
ENSG00000137154	RPS6	0.0996729	8.65916	0.668195
ENSG00000139344	AMDHD1	0.124927	0.319012	0.668195
ENSG00000139624	CERS5	-0.027548	4.87651	0.668195
ENSG00000139880	CDH24	0.158445	-1.65685	0.668195
ENSG00000139946	PELI2	-0.0437623	6.84932	0.668195
ENSG00000140379	BCL2A1	0.111065	4.50127	0.668195
ENSG00000141084	RANBP10	0.108712	5.14136	0.668195
ENSG00000141337	ARSG	-0.0423892	5.71247	0.668195
ENSG00000141447	OSBPL1A	-0.0585826	3.69	0.668195
ENSG00000141854	CTB-55O6.8	-0.106484	0.250452	0.668195
ENSG00000143157	POGK	0.0214772	6.23103	0.668195
ENSG00000143224	PPOX	0.0465281	3.65843	0.668195
ENSG00000143333	RGS16	0.150146	-0.630091	0.668195
ENSG00000143393	PI4KB	0.033651	6.05063	0.668195
ENSG00000143653	SCCPDH	-0.0637136	3.50375	0.668195
ENSG00000144320	KIAA1715	0.0450906	5.66096	0.668195
[truncated: 19,877 more rows]

## Sheet: SE vs. ULE
Ensembl gene ID	HUGO gene symbol	Log fold change	Average expression	FDR
[truncated: 21,637 more rows]

[truncated: 1 more sheets: SE vs. AD]
