# Supplementary figures and images for: Clustering-based COPD subtypes have distinct longitudinal outcomes and multi-omics biomarkers
Source: HighWire-hosted journal article supplement (doi:10.1136/bmjresp-2021-001182), 2022-08-01

**Figure S4**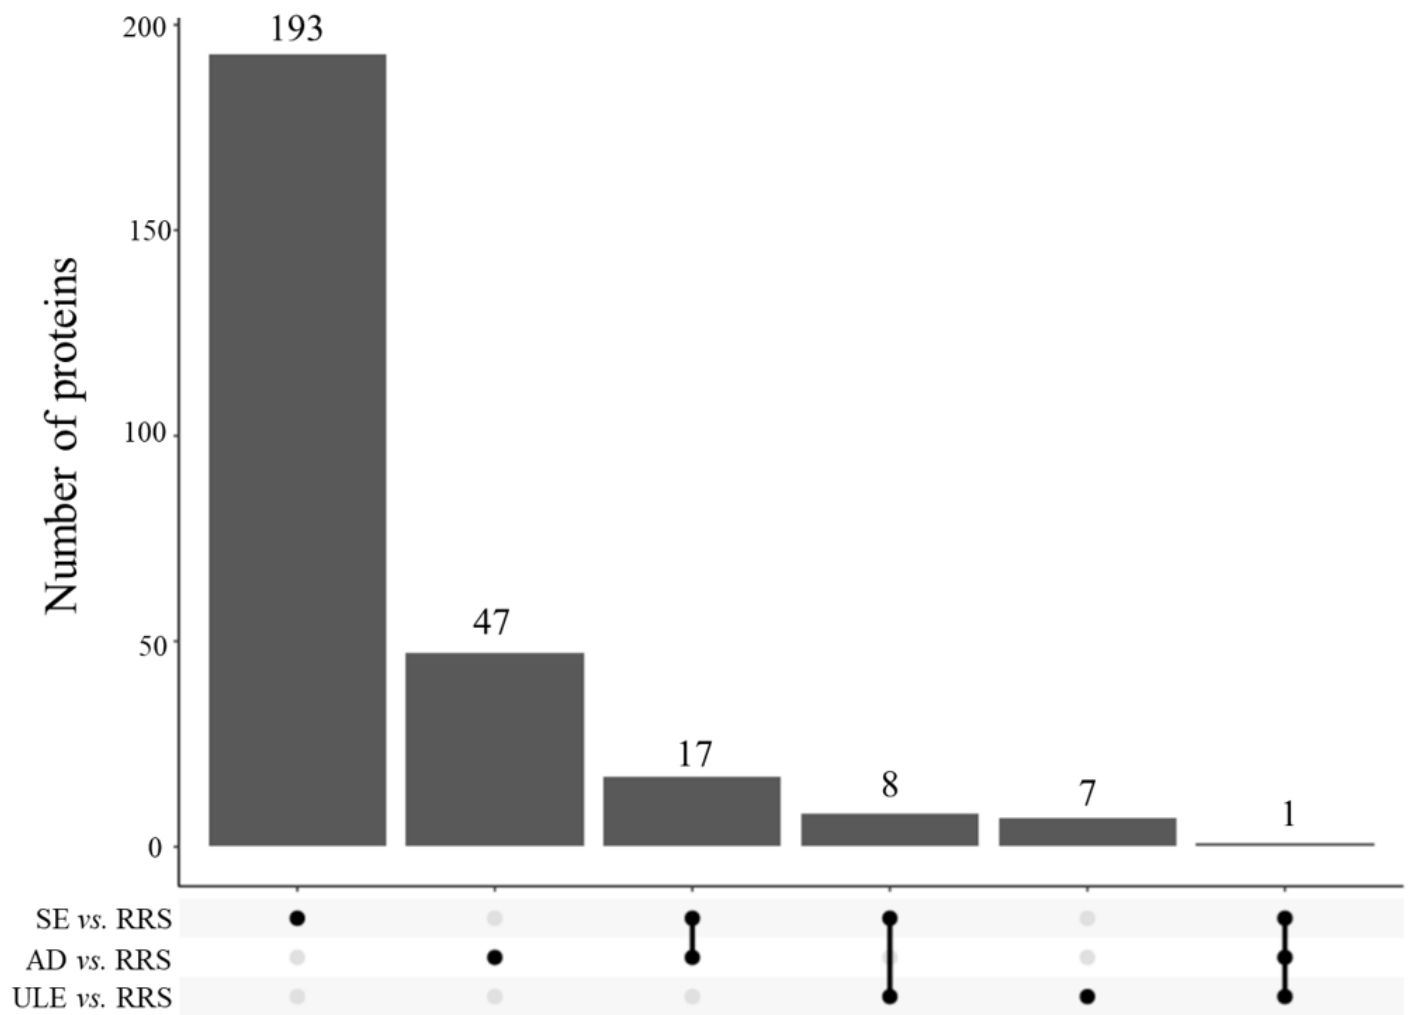

Supplement: bmjresp-2021-001182supp004_data_supplement.pdf [file bmjresp-2021-001182supp004_data_supplement.pdf]
